# Supplementary material for: Beyond Melanin: Proteomics Reveals Virulence-Related Proteins in Paracoccidioides brasiliensis and Paracoccidioides lutzii Yeast Cells Grown in the Presence of L-Dihydroxyphenylalanine
Source: MDPI journal article supplement (doi:10.3390/jof6040328), 2020-12-01

## Glycolysis / Gluconeogenesis

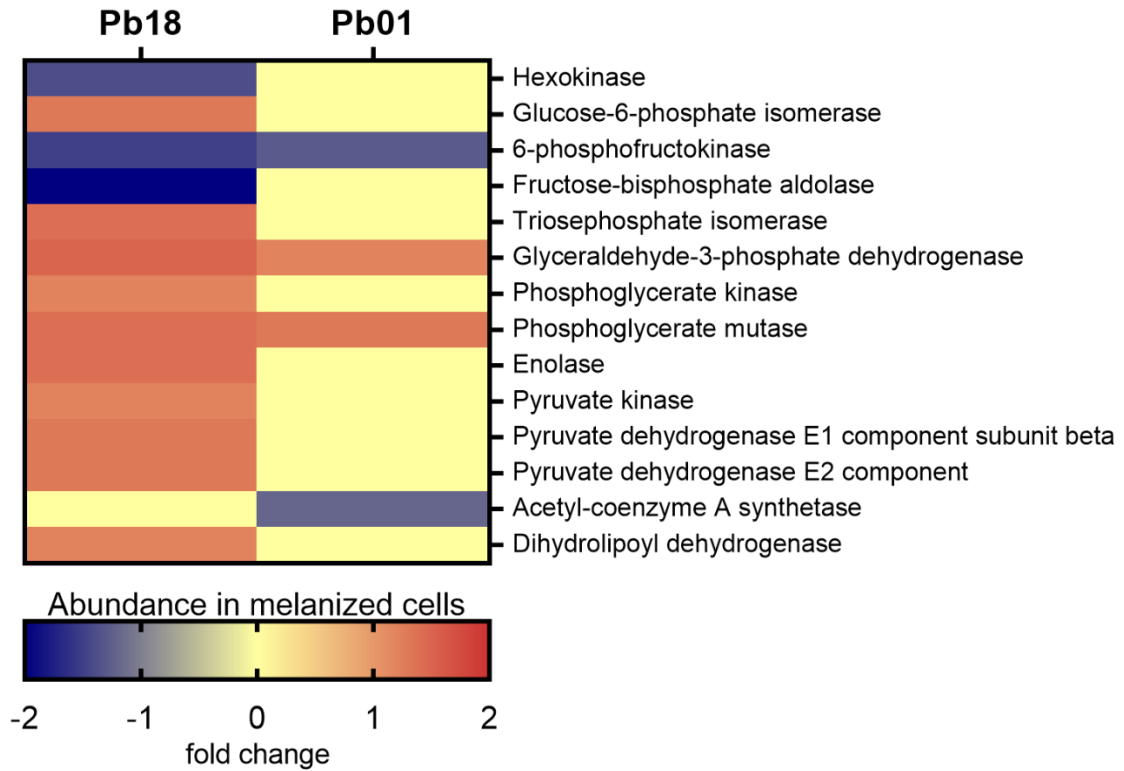

## Tricarboxylic acid cycle

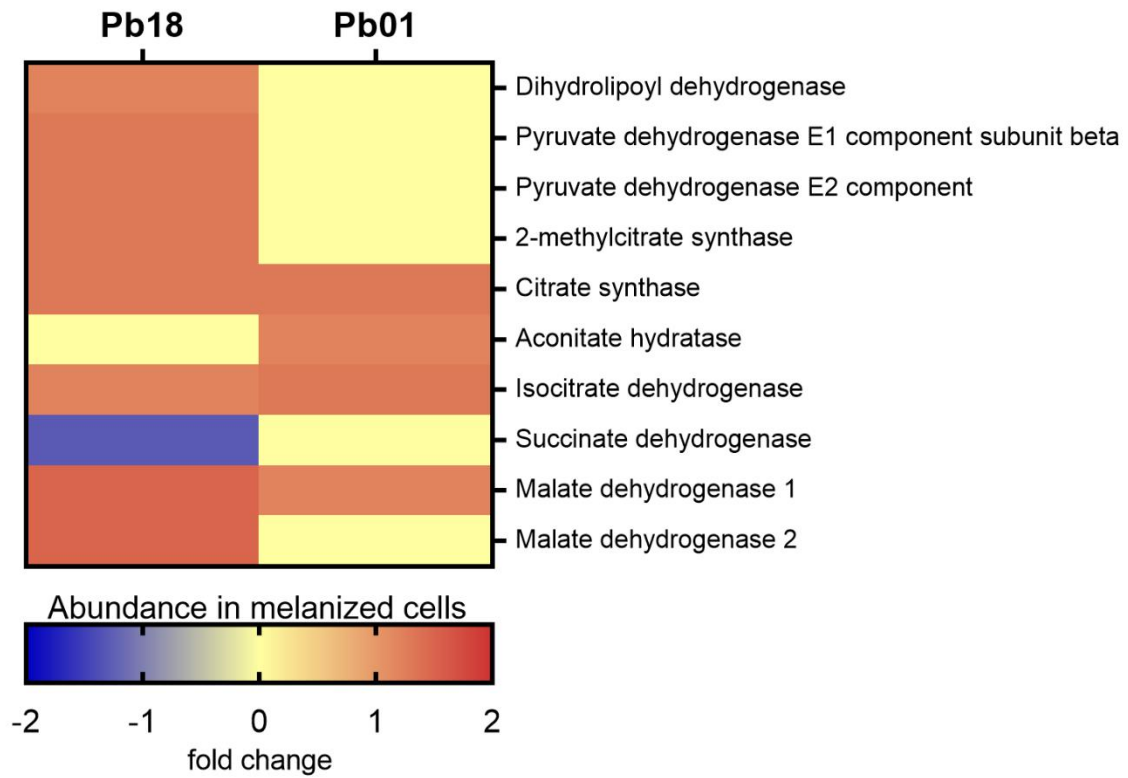

## Glyoxylate cycle

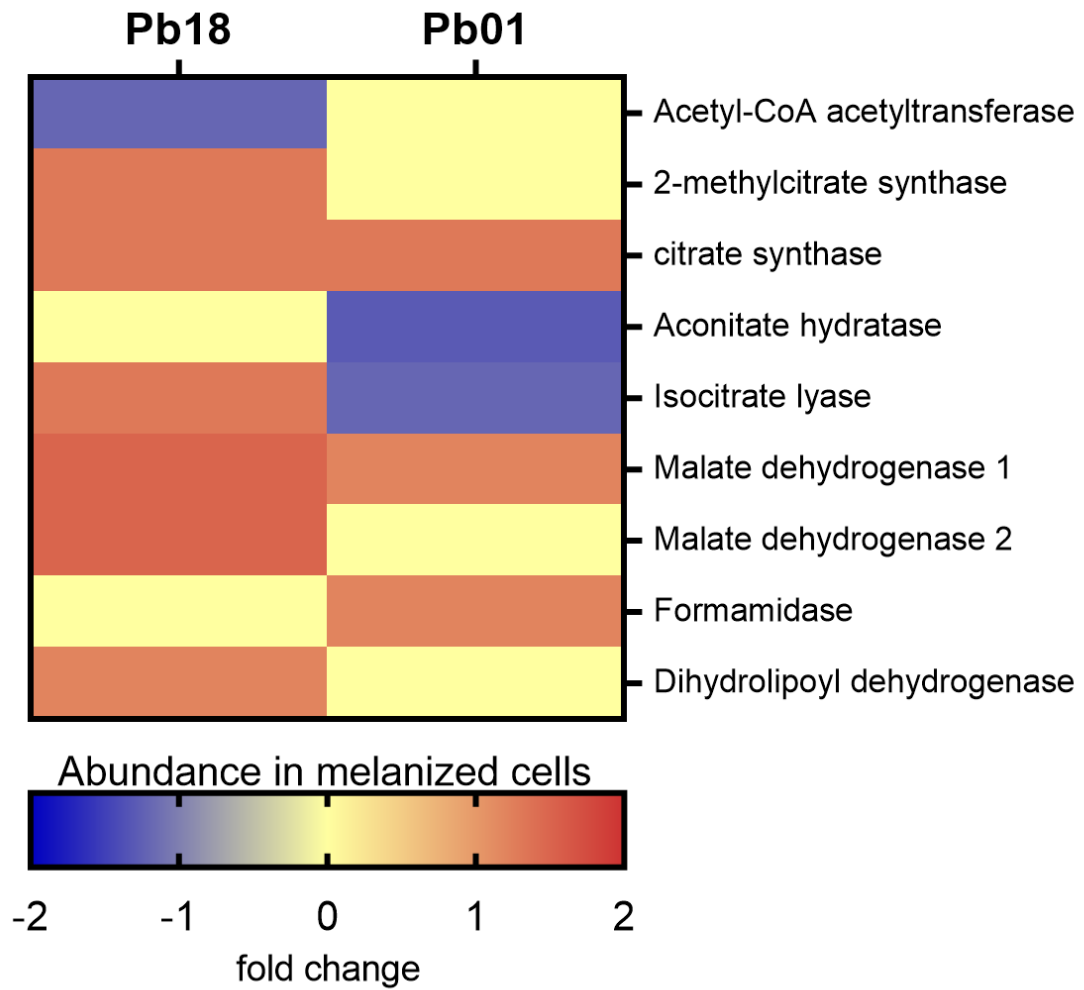

## Methane metabolism

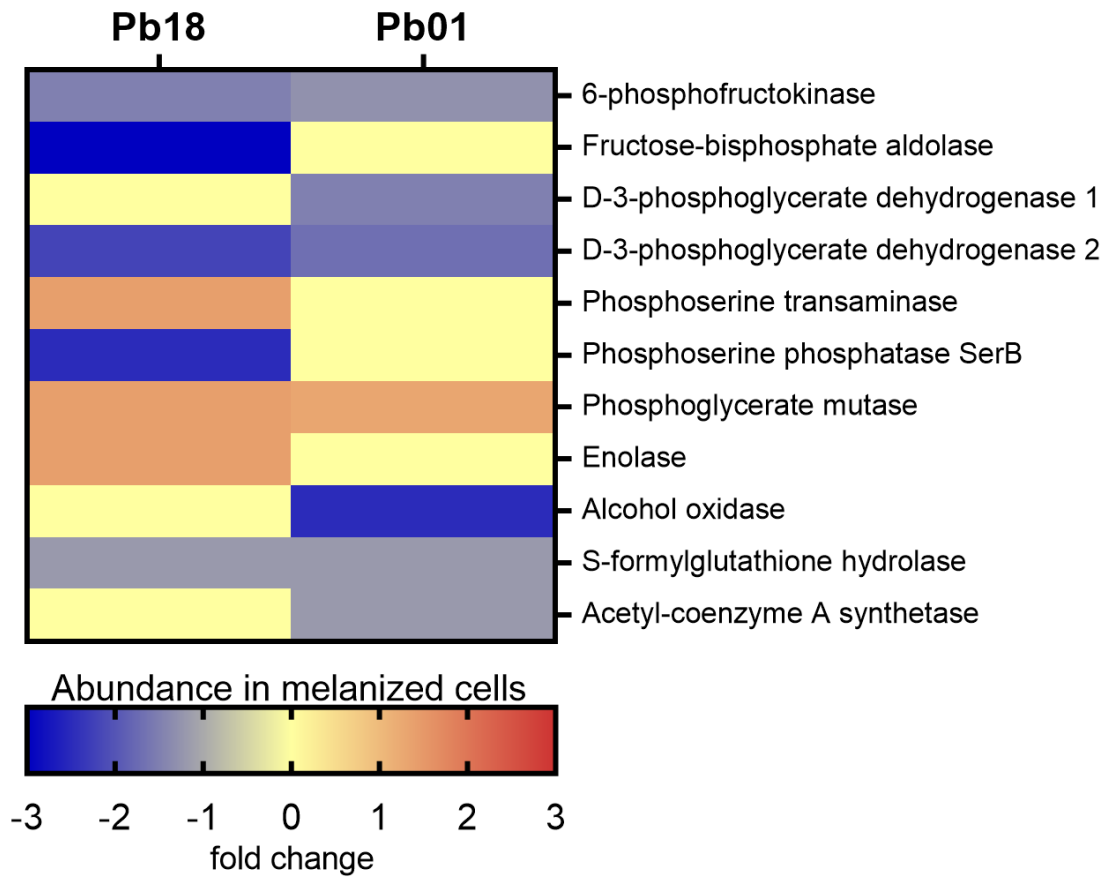

Pentose Phosphate Pathway

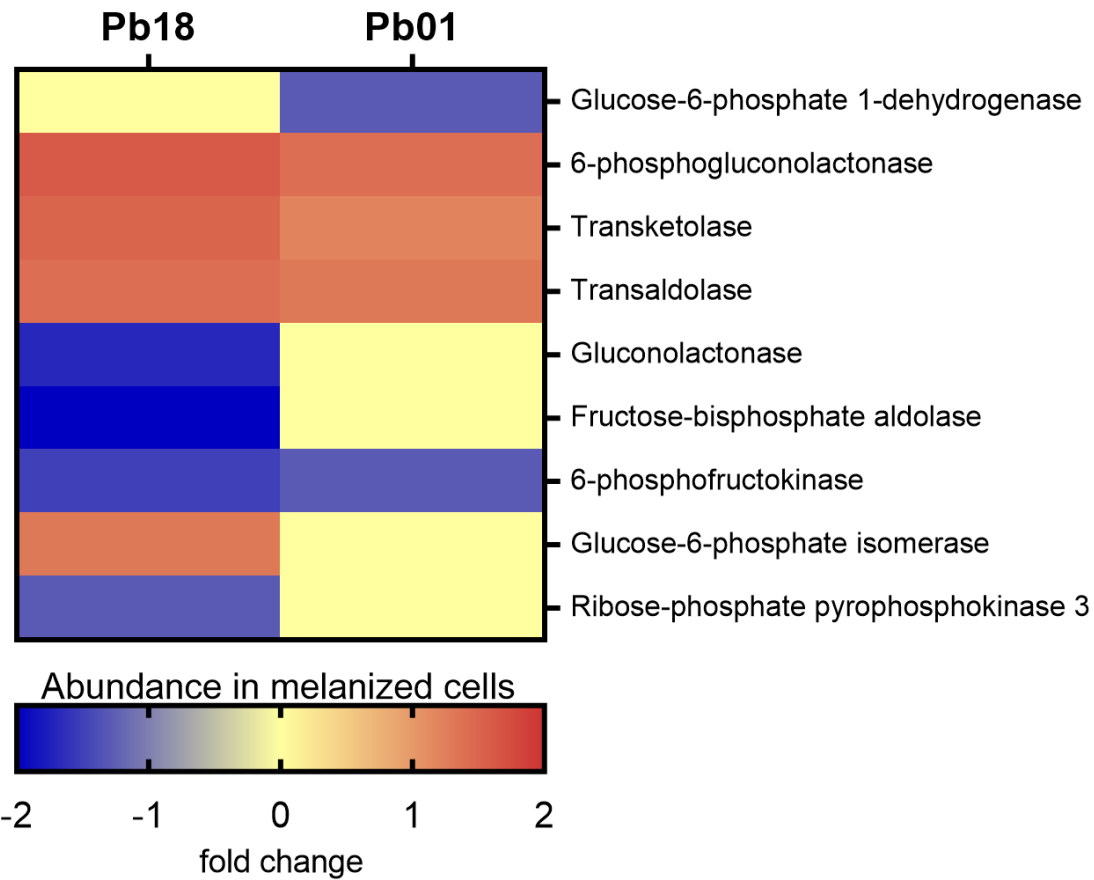

## Purine metabolism

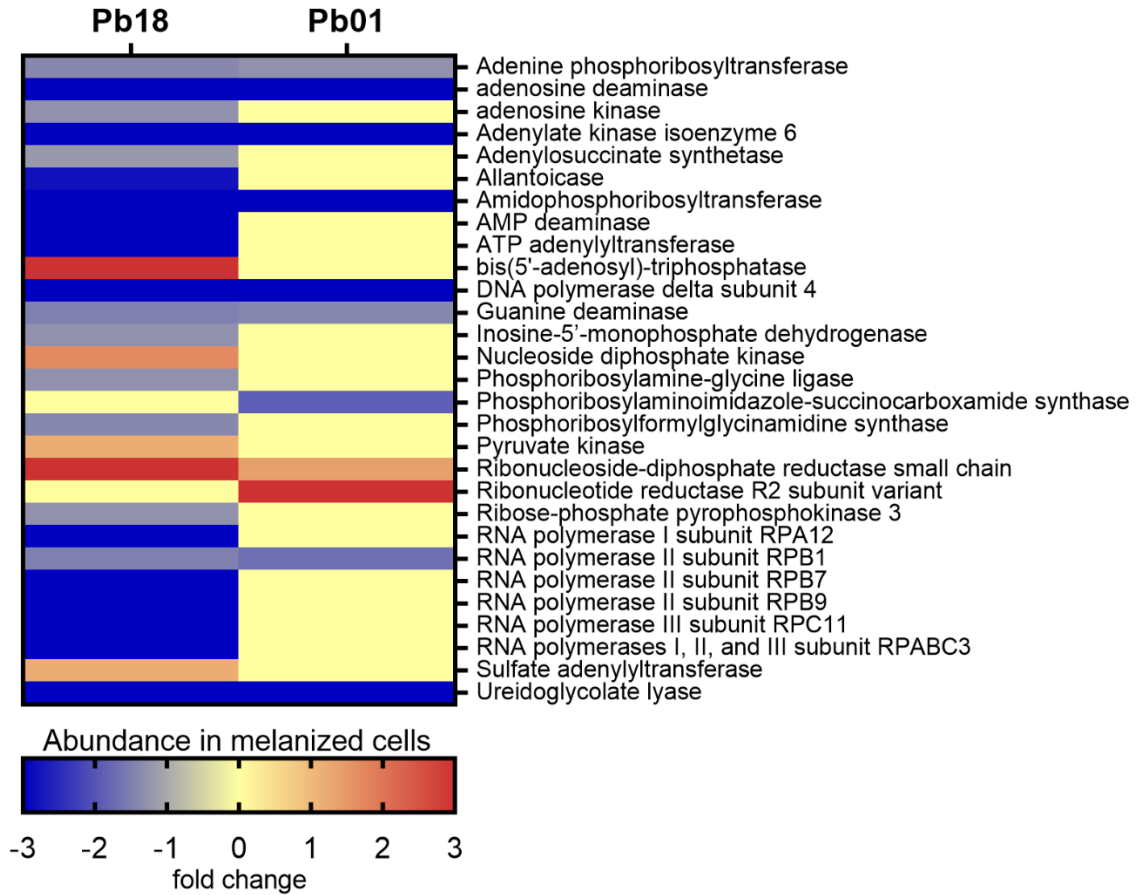

# Pyrimidine metabolism

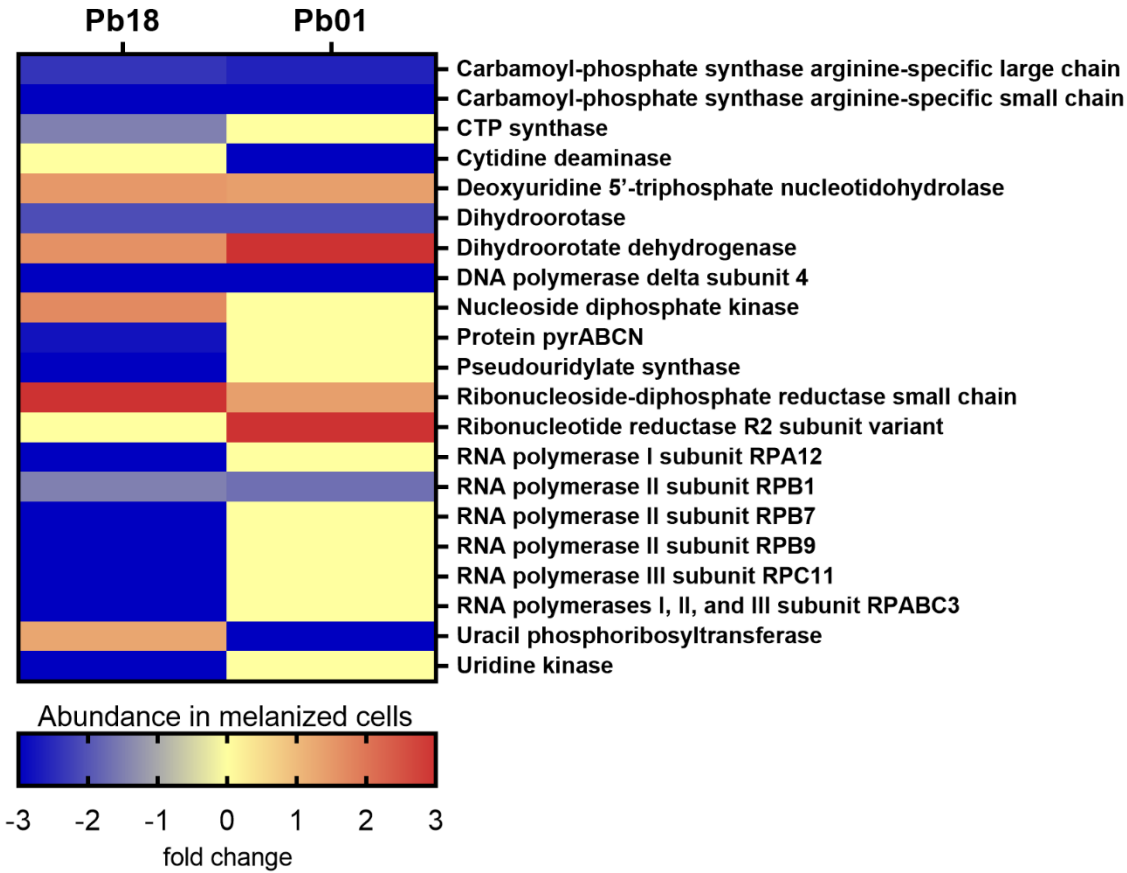

Tyrosine Metabolism

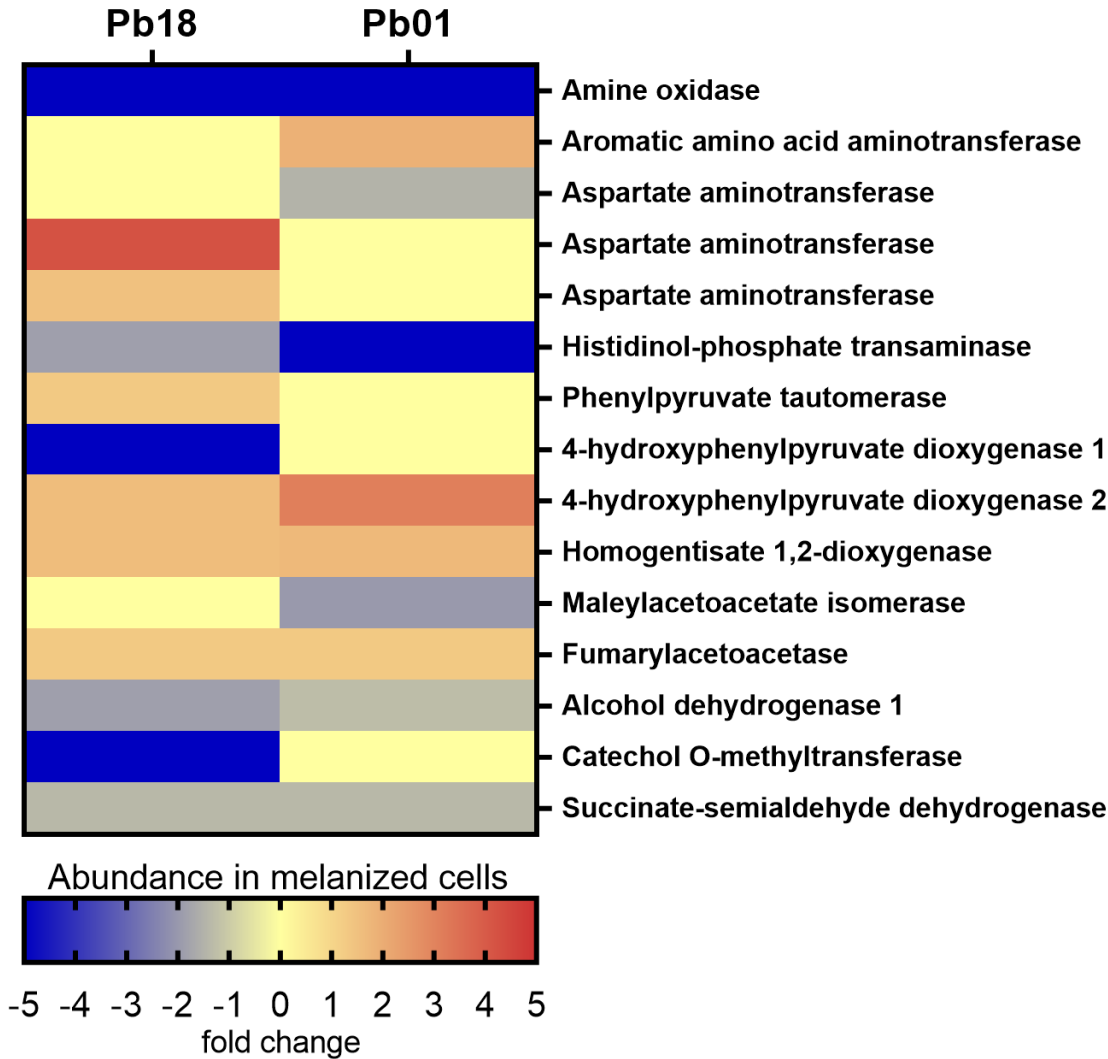



## Glycine, serine, and threonine metabolism

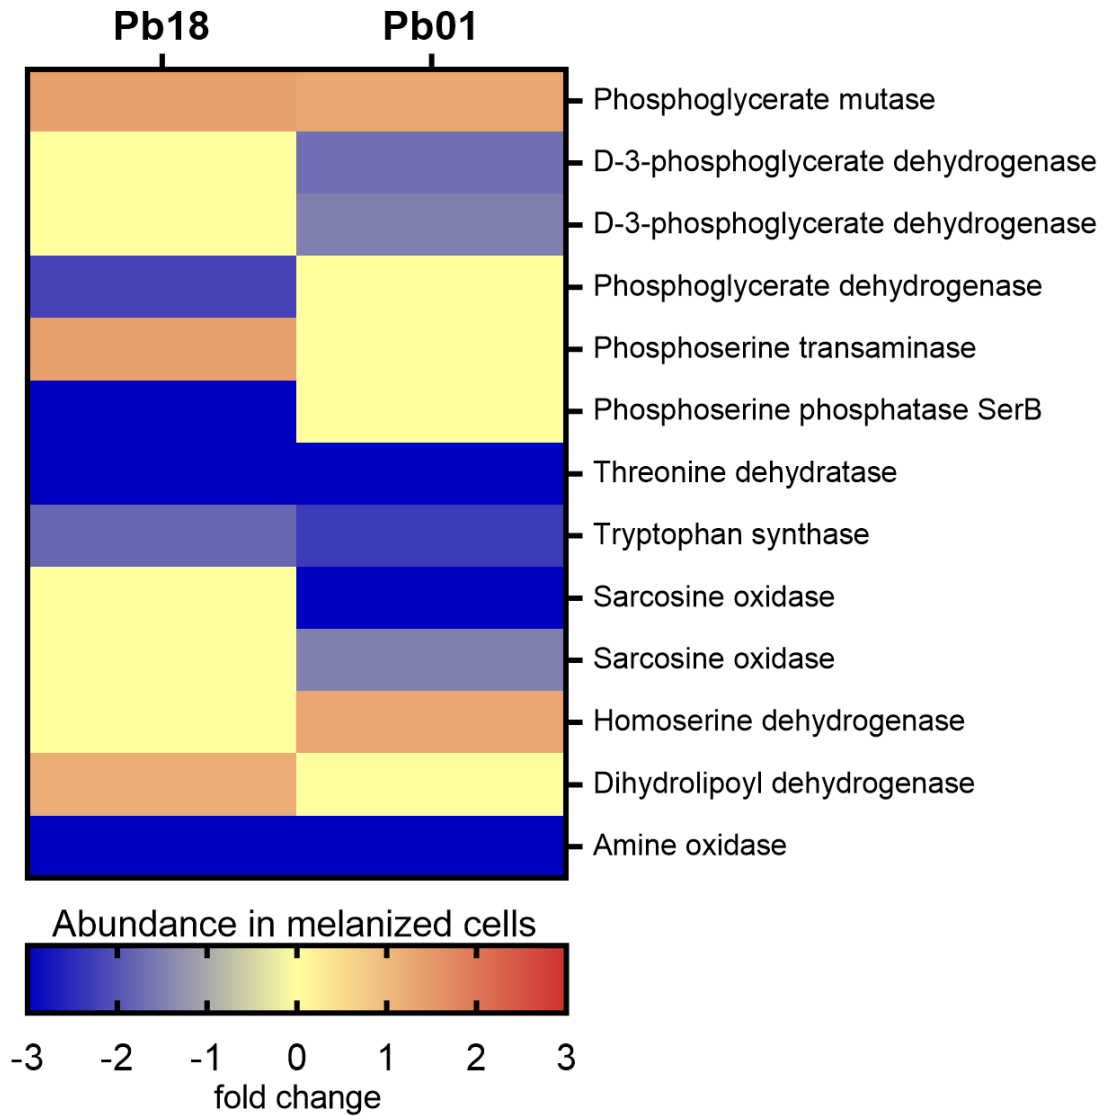

# Phenylalanine metabolism

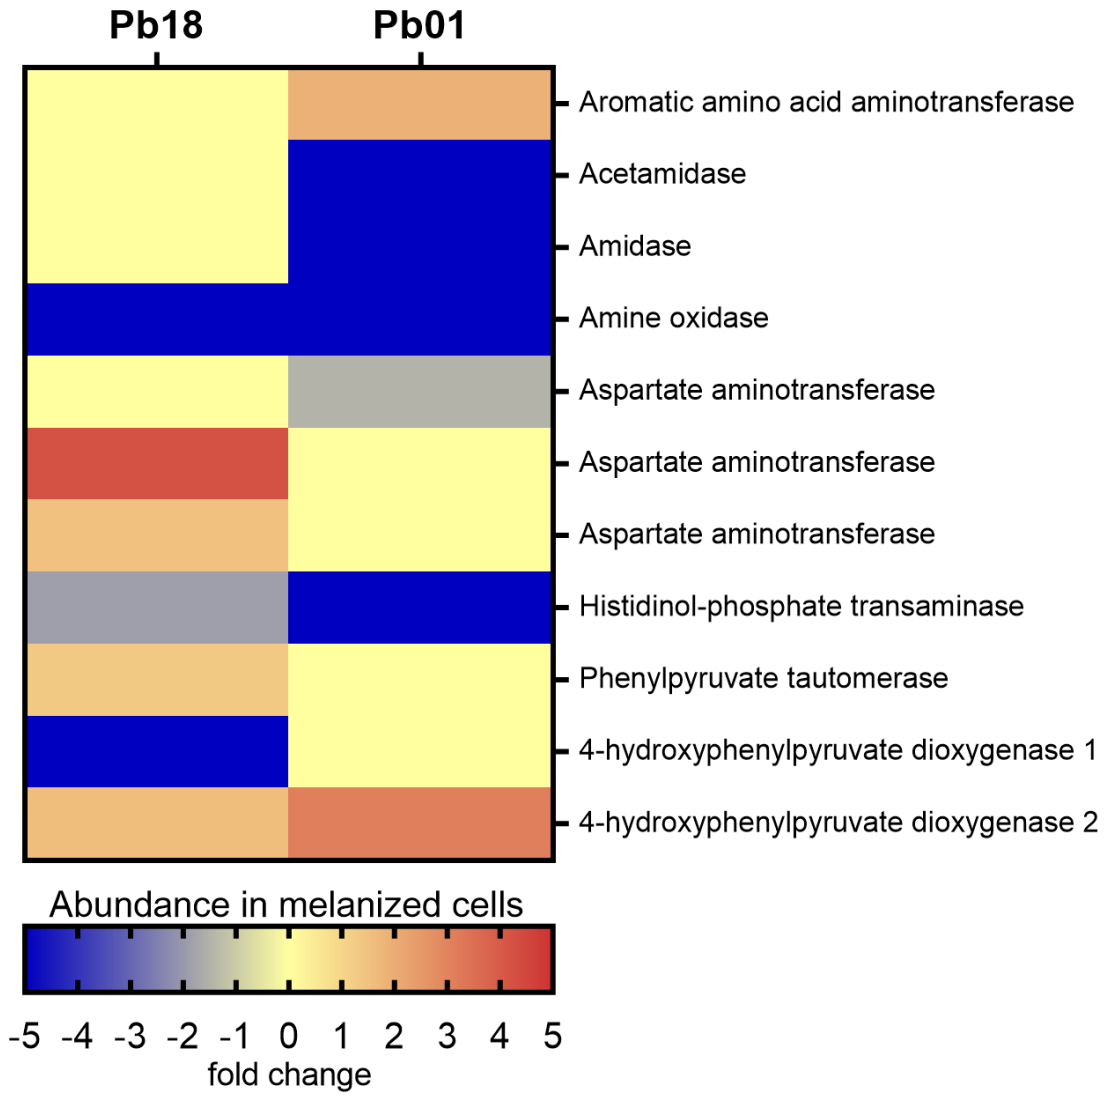

Alanine, aspartate, and glutamate metabolism

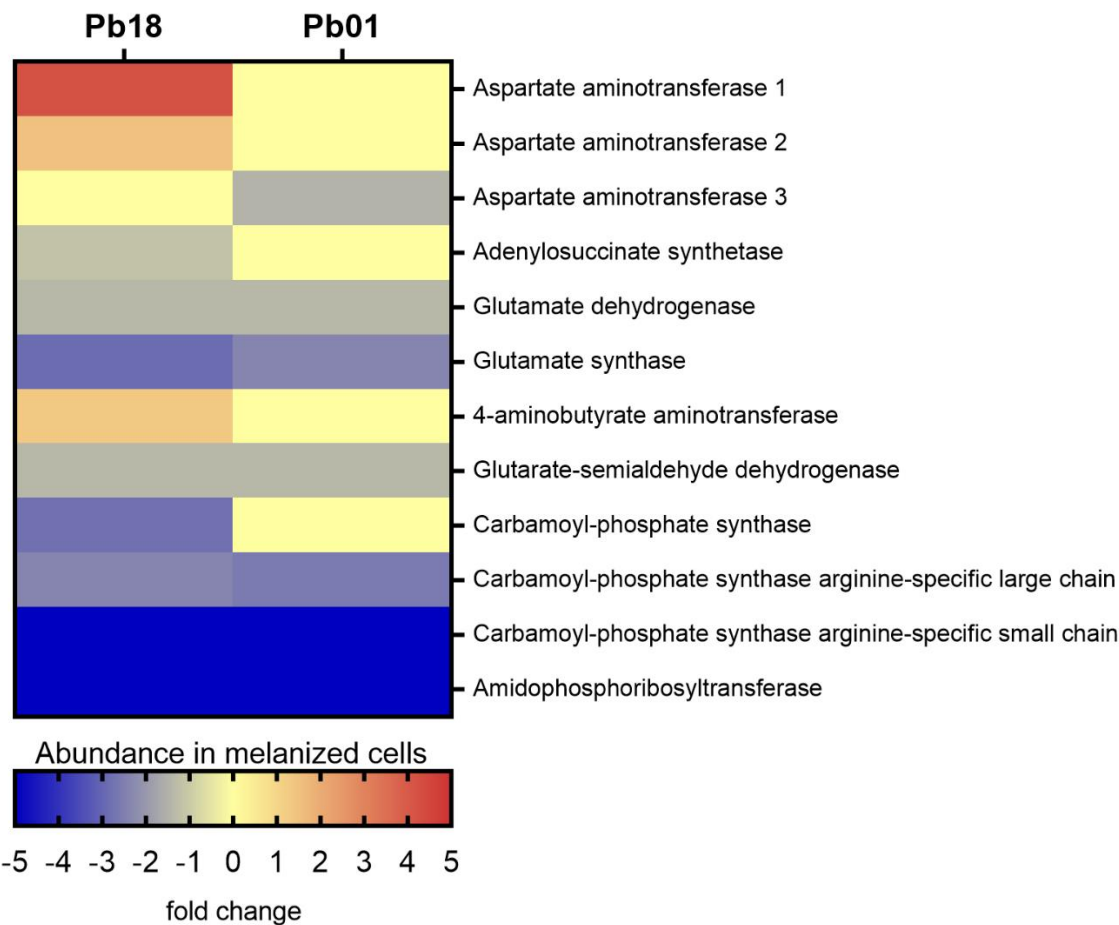

Phenylalanine, tyrosine, and tryptophan biosynthesis

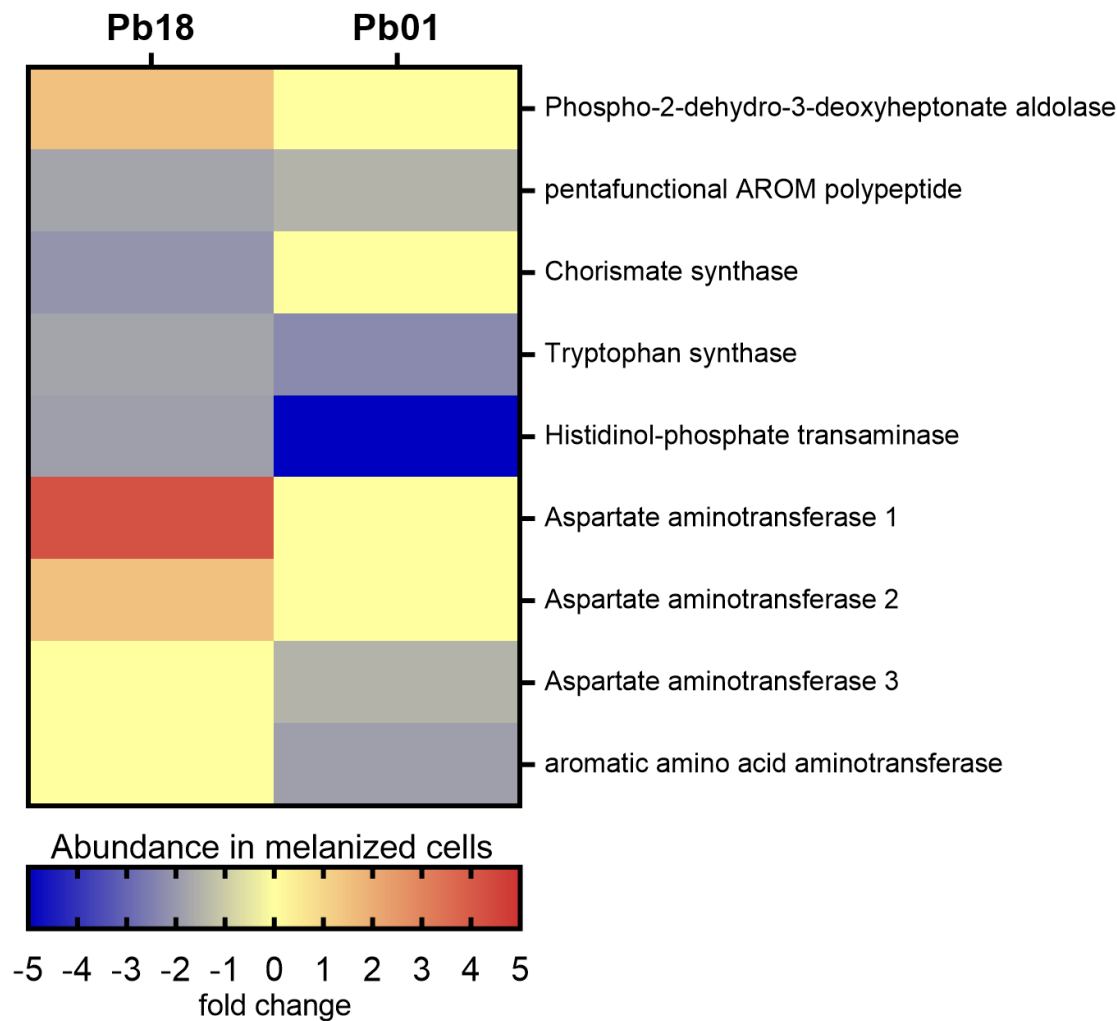

Valine, leucine, and isoleucine degradation

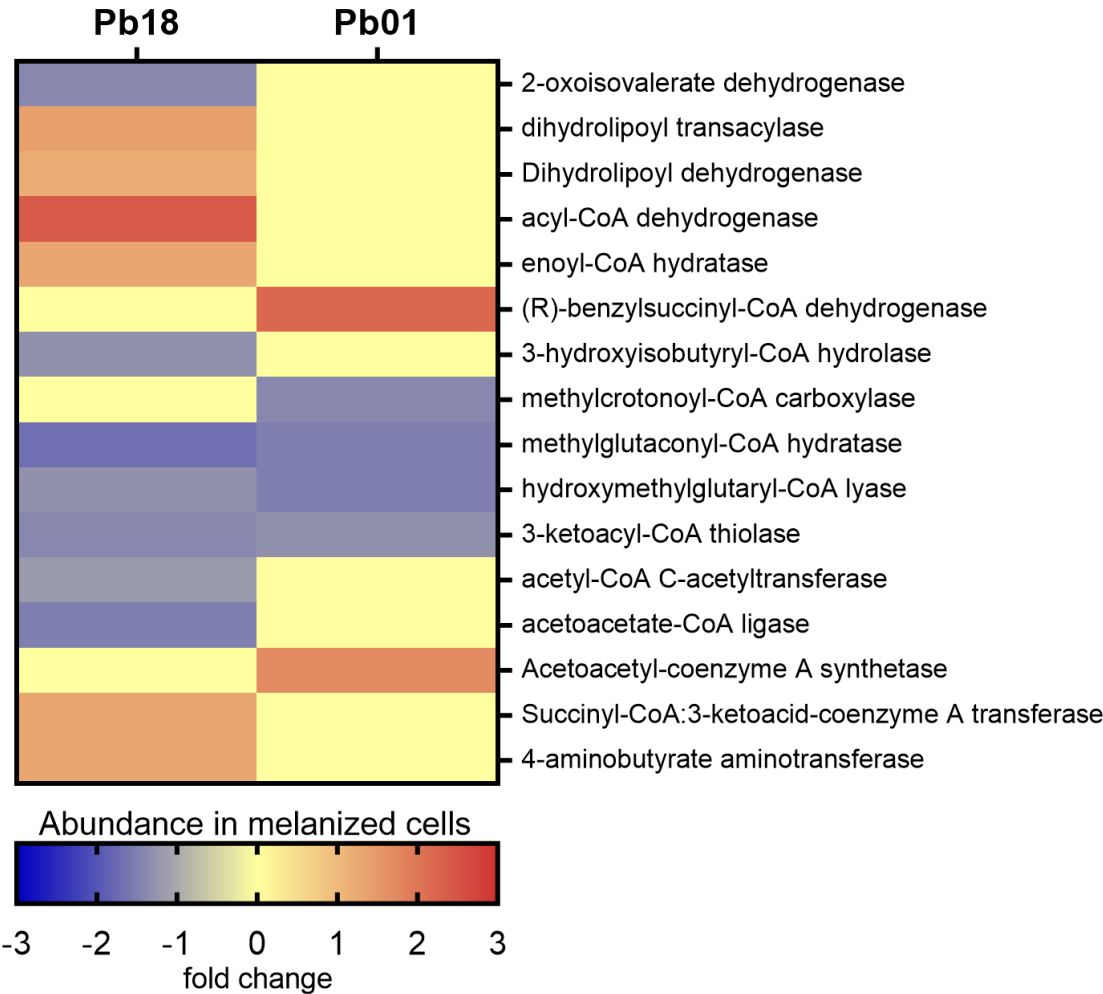

## Valine, leucine, and isoleucine biosynthesis

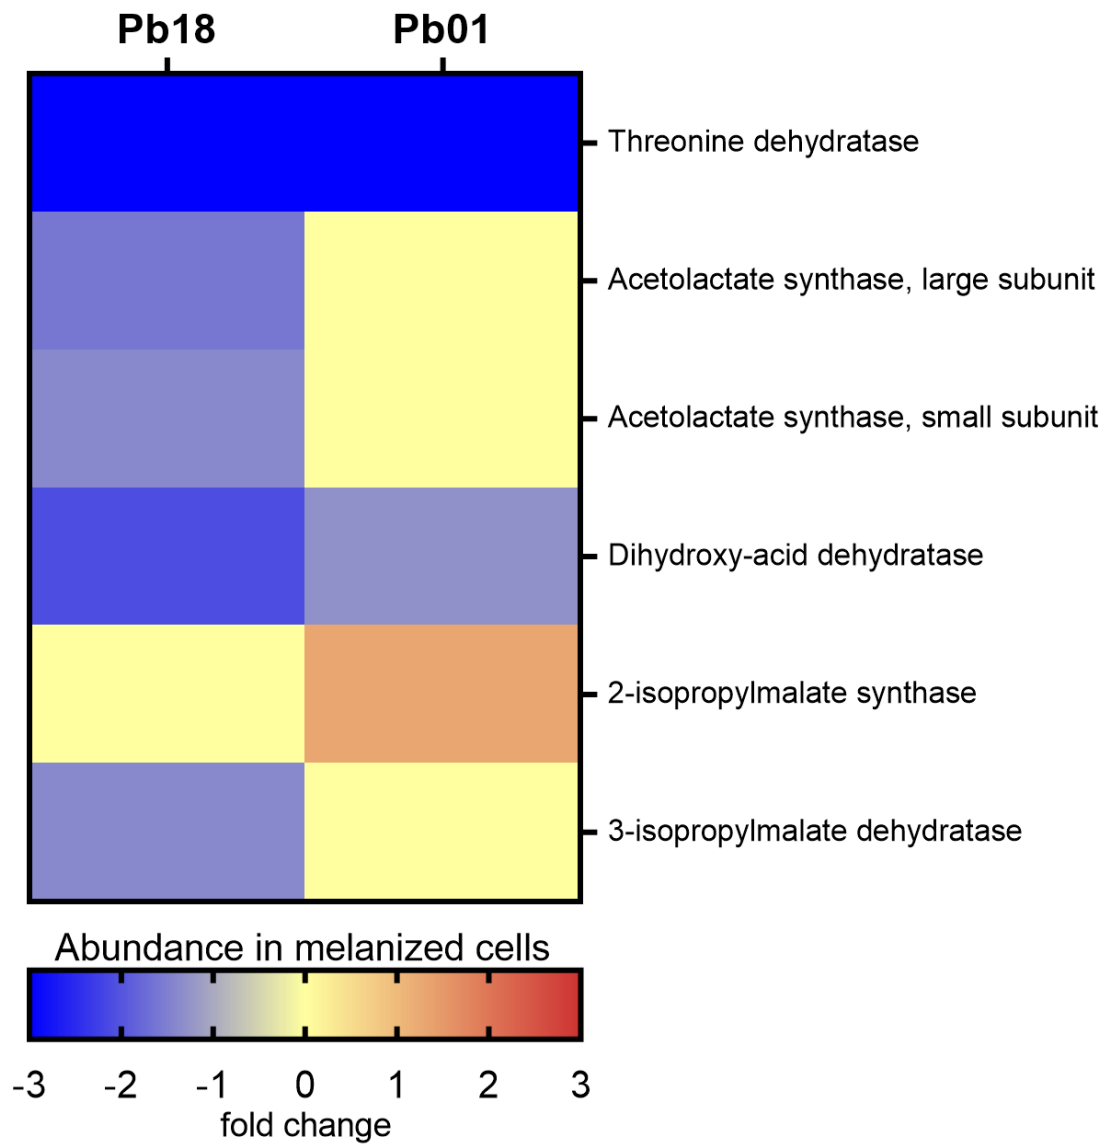

Lysine degradation

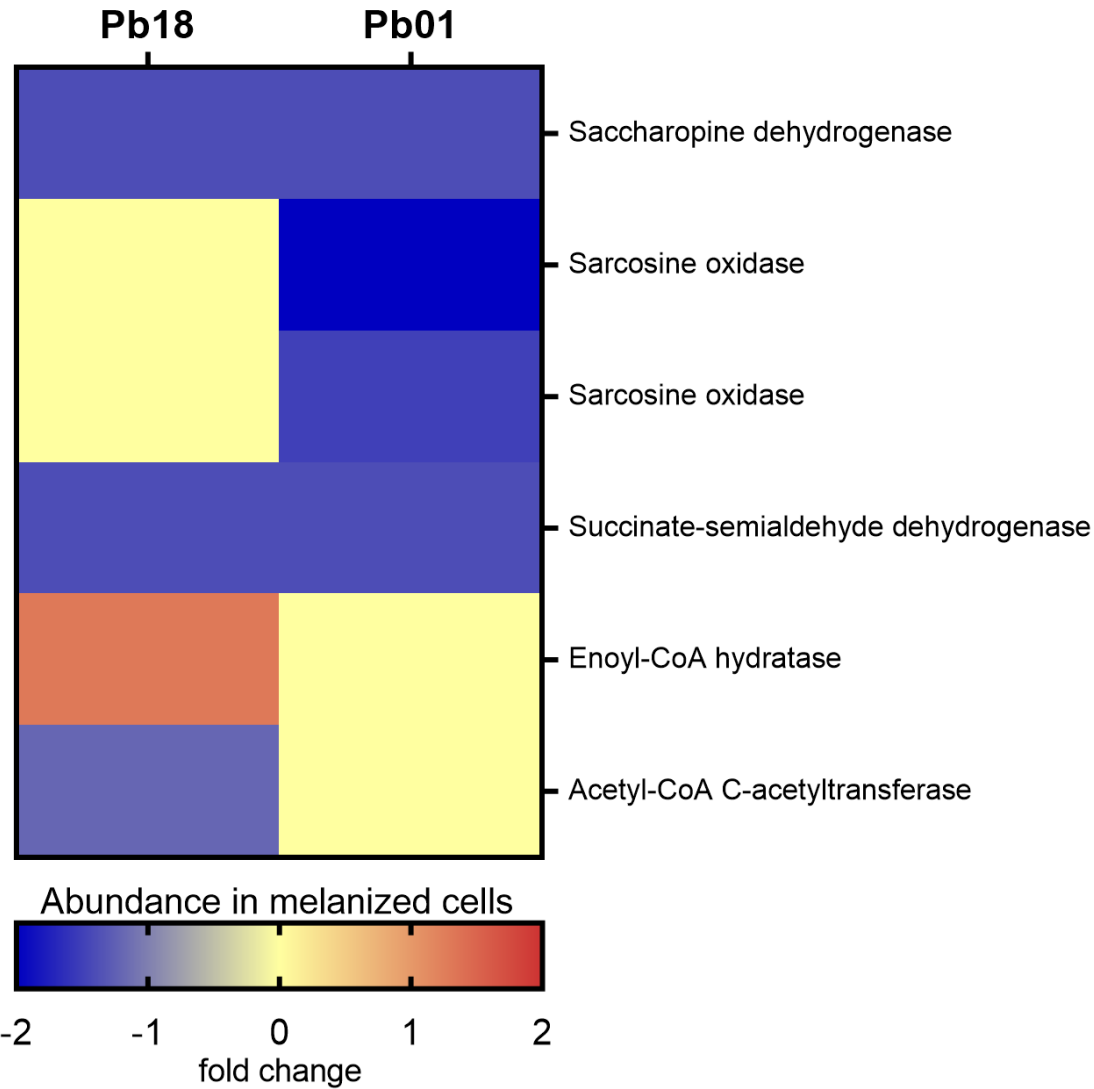

## Arginine biosynthesis

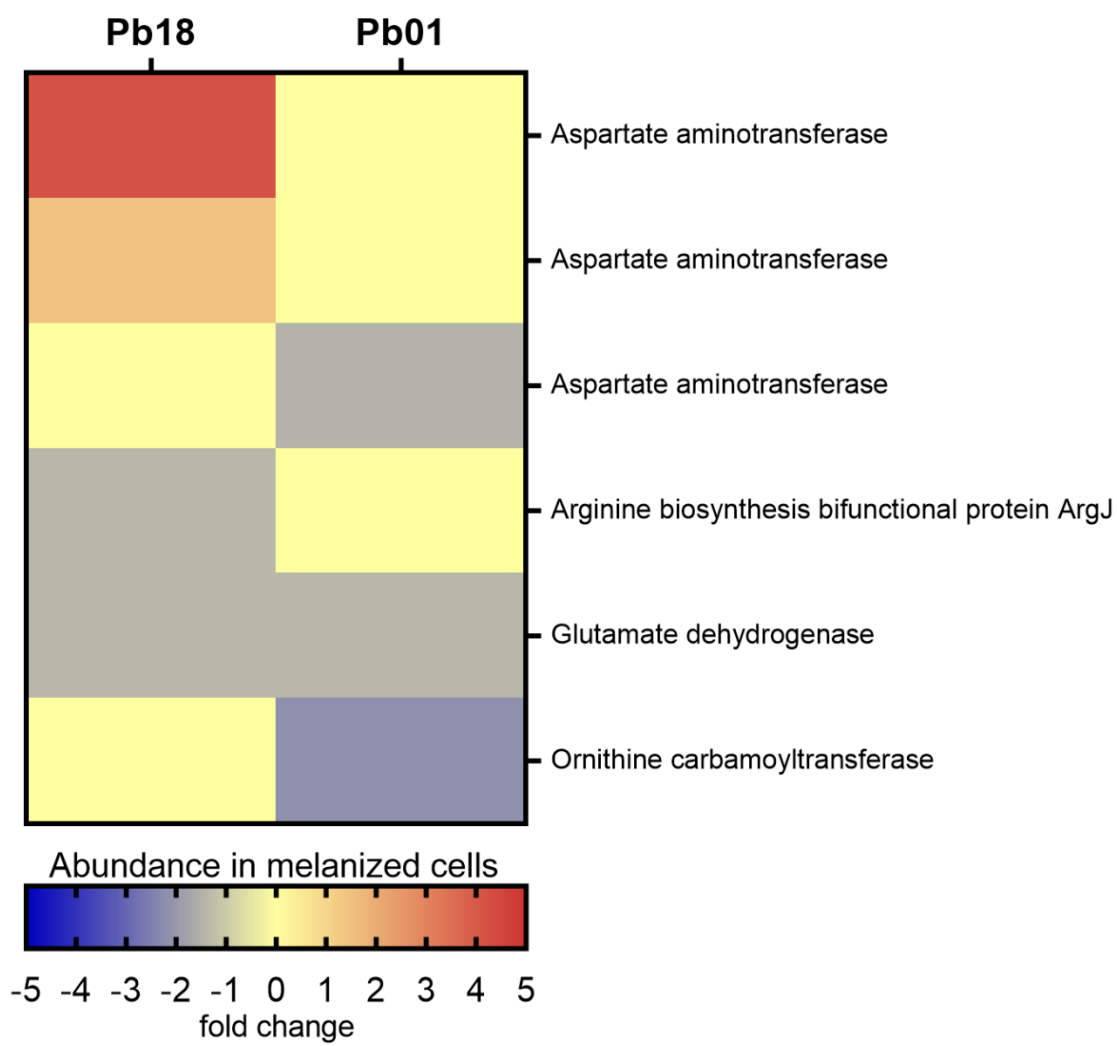



## RNA transport

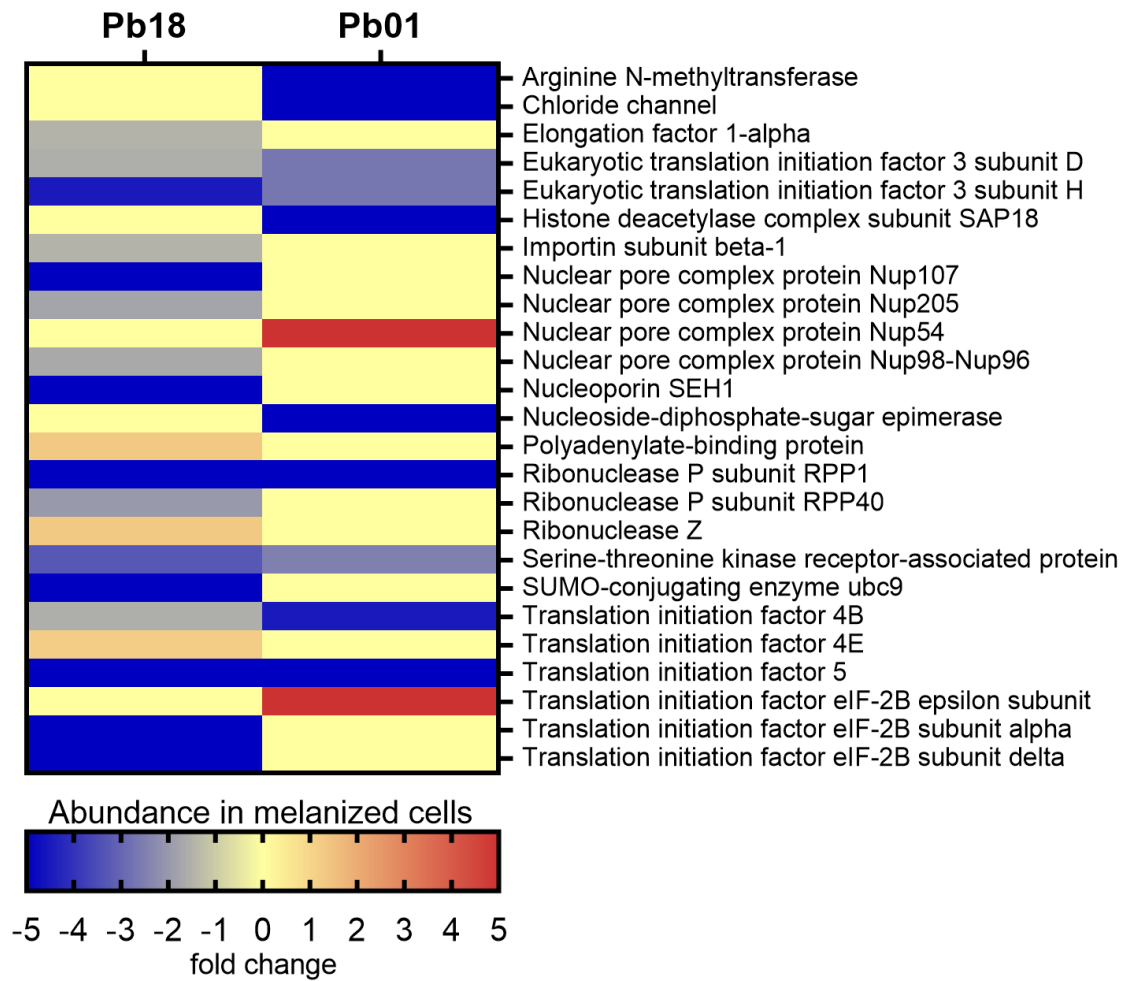

## RNA degradation

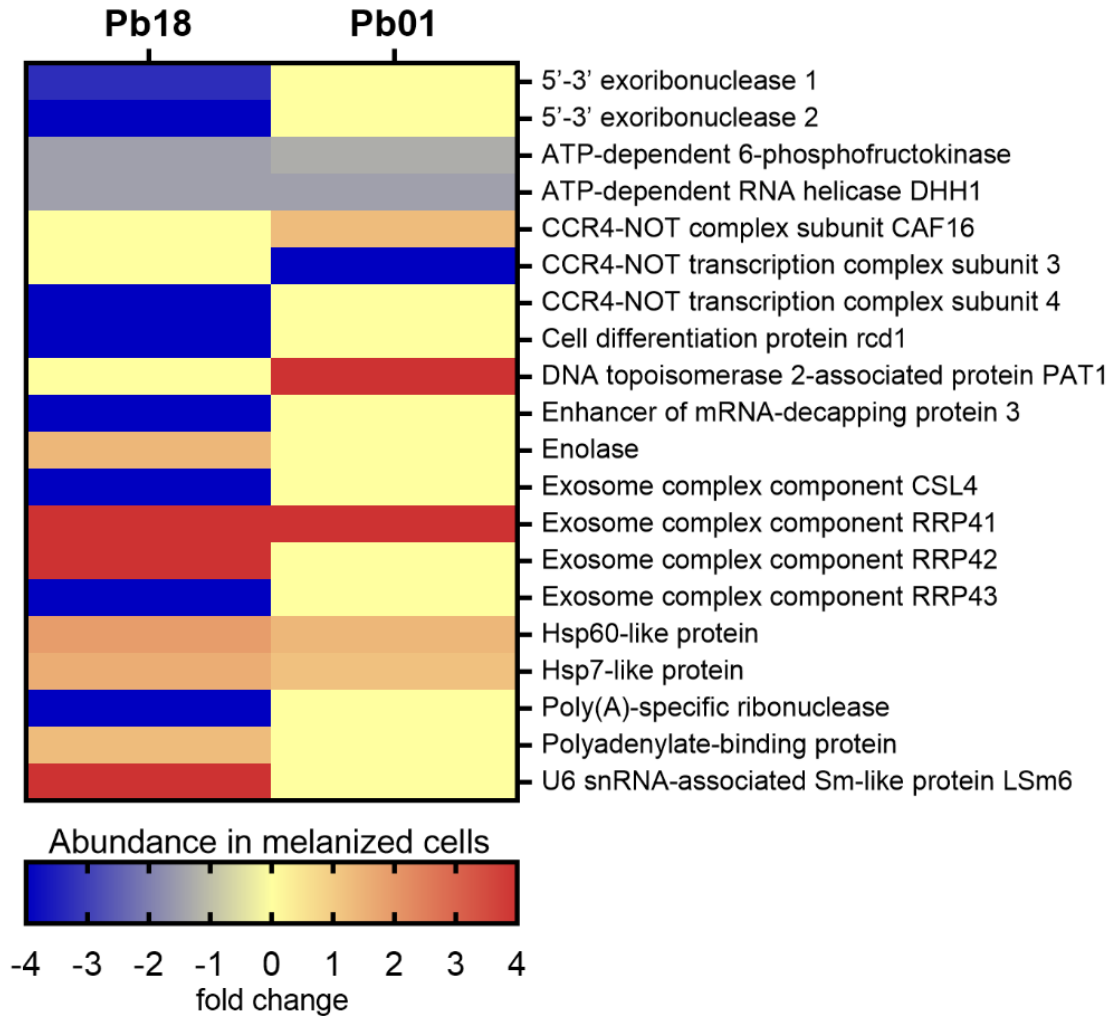

Supplement: s1 [file s1]
