# Supplementary material for: Beyond Melanin: Proteomics Reveals Virulence-Related Proteins in Paracoccidioides brasiliensis and Paracoccidioides lutzii Yeast Cells Grown in the Presence of L-Dihydroxyphenylalanine
Source: J Fungi (Basel). 2020 Dec 1;6(4):328. doi: 10.3390/jof6040328 (PMC7711940; doi:10.3390/jof6040328)
Supplement: Supplementary file 1 [file jof-06-00328-s001.zip]

Archive with 11 entries (11 files):
- FigureS1.tif
- FigureS2.tif
- FigureS3.tif
- FigureS4.tif
- FigureS5.tif
- FigureS6.tif
- FigureS7.tif
- FigureS8.pdf
- FigureS9.tif
- TableS1_R1_RHV.xlsx
- TableS2_R1_RHV.xlsx
