# Supplementary material for: Beyond Melanin: Proteomics Reveals Virulence-Related Proteins in Paracoccidioides brasiliensis and Paracoccidioides lutzii Yeast Cells Grown in the Presence of L-Dihydroxyphenylalanine
Source: J Fungi (Basel). 2020 Dec 1;6(4):328. doi: 10.3390/jof6040328 (PMC7711940; doi:10.3390/jof6040328)
Supplement: Supplementary file 1 [file jof-06-00328-s001.zip › TableS1_R1_RHV.xlsx]

## Sheet: Conditions&Volcano Plot
#PatternLab's TFold analyzer
	Blue dots - Identifications satisfied both, the automatic fold and statistical criteria.
#Parameters used:	Green dots - Identifications satisfied the fold criteria but, most likely, this happened by chance (should be disconsidered).
Normalization used: Total Spectral Count	Red dots - Identifications did not meet the fold and p-value criteria (should be disconsidered).
Minimum Replicates PER CLASS = 3	Orange dots - Identifications were filtered out by the L-stringency and so deserve further experimentation to verify if they are indeed differentially expressed.
BH q-value: 0.01; F-stringency: 0.03; L-Stringency: 0.60
#PatternLab Project File: E:\Dropbox\Marcos_INI_PatternLab\Pb18_Master\Quant_SpectralCount\PatternLabProjectFile_Proteins_UniquePeptides.plp
#Top Class: Pb18
#Bottom Class: Pb18LD
Negative (-) Fold change = Less abundant in Pb18
Positive (+) Fold change = More abundant in Pb18

## Sheet: Blue
Protein id	Fold Change	pValue	GPI (Index in the sparse matrix)	Signal(Pb18LD)	Signal(Pb18)	Description
C1FYW2	-4.25224	0.000465025	2060	0.000468951	0.000110283	Uncharacterized protein OS=Paracoccidioides brasiliensis (strain Pb18) OX=502780 GN=PADG_00988 PE=3 SV=2
C1G8V0	-4.18031	0.000610861	2939	0.000372068	8.9005e-05	Aspartate aminotransferase OS=Paracoccidioides brasiliensis (strain Pb18) OX=502780 GN=PADG_03686 PE=4 SV=1
C1GGA2	-3.29471	0.000179632	225	0.000438822	0.00013319	DNA topoisomerase 2 OS=Paracoccidioides brasiliensis (strain Pb18) OX=502780 GN=PADG_06339 PE=4 SV=2
C1FZB5	-2.61103	0.00349215	1405	0.000506326	0.000193918	Uncharacterized protein OS=Paracoccidioides brasiliensis (strain Pb18) OX=502780 GN=PADG_01141 PE=4 SV=2
C1G0I3	-2.56535	1e-05	1610	0.00118693	0.000462678	Uncharacterized protein OS=Paracoccidioides brasiliensis (strain Pb18) OX=502780 GN=PADG_00373 PE=4 SV=1
C1FZM0	-2.48536	5.8604e-05	1320	0.000554062	0.00022293	Uncharacterized protein OS=Paracoccidioides brasiliensis (strain Pb18) OX=502780 GN=PADG_00060 PE=4 SV=1
C1G278	-2.37816	0.0017031	2459	0.000318702	0.000134012	Uncharacterized protein OS=Paracoccidioides brasiliensis (strain Pb18) OX=502780 GN=PADG_02244 PE=3 SV=2
C1G4T8	-2.23659	9.91668e-05	2848	0.000912384	0.000407935	Superoxide dismutase OS=Paracoccidioides brasiliensis (strain Pb18) OX=502780 GN=PADG_01954 PE=3 SV=2
C1G1E8	-2.16391	6.59959e-05	176	0.000461793	0.000213407	Uncharacterized protein OS=Paracoccidioides brasiliensis (strain Pb18) OX=502780 GN=PADG_00688 PE=4 SV=2
C1GBA6	-2.15869	0.00499063	1323	0.000345102	0.000159867	Uncharacterized protein OS=Paracoccidioides brasiliensis (strain Pb18) OX=502780 GN=PADG_04907 PE=4 SV=1
C1GCU5	-2.10203	2.74899e-05	2857	0.000543372	0.000258499	Uncharacterized protein OS=Paracoccidioides brasiliensis (strain Pb18) OX=502780 GN=PADG_04817 PE=4 SV=1
C1G647	-2.02271	1e-05	1970	0.0027695	0.0013692	Uncharacterized protein OS=Paracoccidioides brasiliensis (strain Pb18) OX=502780 GN=PADG_02652 PE=4 SV=1
C1GMC6	-2.01458	1.34551e-05	1169	0.000859811	0.000426794	Uncharacterized protein OS=Paracoccidioides brasiliensis (strain Pb18) OX=502780 GN=PADG_08212 PE=4 SV=1
C1G634	-2.00966	0.000210285	2925	0.000338171	0.000168273	Protein fmp52-2, mitochondrial OS=Paracoccidioides brasiliensis (strain Pb18) OX=502780 GN=PADG_02639 PE=4 SV=1
C1GHN0	-1.97061	6.9639e-05	1154	0.00239932	0.00121755	Mitochondrial-processing peptidase subunit beta OS=Paracoccidioides brasiliensis (strain Pb18) OX=502780 GN=PADG_06766 PE=3 SV=1
C1FYK9	-1.96787	0.000437282	2915	0.000471455	0.000239576	Uncharacterized protein OS=Paracoccidioides brasiliensis (strain Pb18) OX=502780 GN=PADG_00885 PE=4 SV=2
C1GLK3	-1.94088	6.01417e-05	1233	0.000776008	0.000399823	60S acidic ribosomal protein P1 OS=Paracoccidioides brasiliensis (strain Pb18) OX=502780 GN=PADG_08244 PE=3 SV=1
C1GME5	-1.93554	0.00260553	199	0.00035996	0.000185974	Uncharacterized protein OS=Paracoccidioides brasiliensis (strain Pb18) OX=502780 GN=PADG_08231 PE=4 SV=2
C1GF70	-1.92701	0.000287605	1581	0.000839861	0.000435837	Histone H2A OS=Paracoccidioides brasiliensis (strain Pb18) OX=502780 GN=PADG_05906 PE=3 SV=1
C1G5V0	-1.92112	1e-05	2380	0.00148514	0.000773056	Uncharacterized protein OS=Paracoccidioides brasiliensis (strain Pb18) OX=502780 GN=PADG_02555 PE=4 SV=2
A0A0A0HS69	-1.9171	0.00213313	2832	0.000783668	0.000408778	40S ribosomal protein S8 OS=Paracoccidioides brasiliensis (strain Pb18) OX=502780 GN=PADG_12365 PE=3 SV=1
C1GLX8	-1.91442	1e-05	7	0.00601199	0.00314036	Hsp60-like protein OS=Paracoccidioides brasiliensis (strain Pb18) OX=502780 GN=PADG_08369 PE=3 SV=1
C1GKK3	-1.9019	1e-05	145	0.000625568	0.000328918	ATP synthase subunit delta, mitochondrial OS=Paracoccidioides brasiliensis (strain Pb18) OX=502780 GN=PADG_07789 PE=3 SV=1
C1G7P8	-1.88032	2.14679e-05	477	0.0012192	0.000648401	Uncharacterized protein OS=Paracoccidioides brasiliensis (strain Pb18) OX=502780 GN=PADG_03203 PE=4 SV=2
C1GJS0	-1.87869	0.000604721	918	0.000349744	0.000186163	Uncharacterized protein OS=Paracoccidioides brasiliensis (strain Pb18) OX=502780 GN=PADG_07506 PE=4 SV=1
C1G9U4	-1.87172	3.87457e-05	1585	0.00103389	0.000552373	60S acidic ribosomal protein P0 OS=Paracoccidioides brasiliensis (strain Pb18) OX=502780 GN=PADG_04030 PE=3 SV=1
C1GAH4	-1.86912	0.000193812	1584	0.000810494	0.000433624	Uncharacterized protein OS=Paracoccidioides brasiliensis (strain Pb18) OX=502780 GN=PADG_04260 PE=4 SV=2
C1GKG3	-1.85503	2.40309e-05	1545	0.00228908	0.00123399	NAD(P)H:quinone oxidoreductase, type IV OS=Paracoccidioides brasiliensis (strain Pb18) OX=502780 GN=PADG_07749 PE=4 SV=2
C1G4J1	-1.85154	0.000410479	2068	0.000428995	0.000231696	Uncharacterized protein OS=Paracoccidioides brasiliensis (strain Pb18) OX=502780 GN=PADG_01857 PE=4 SV=2
C1FZ35	-1.84996	2.79554e-05	1592	0.000789708	0.000426878	Cyanate hydratase OS=Paracoccidioides brasiliensis (strain Pb18) OX=502780 GN=CYN1 PE=3 SV=1
C1G6F9	-1.8131	1e-05	1052	0.00211477	0.00116639	Uncharacterized protein OS=Paracoccidioides brasiliensis (strain Pb18) OX=502780 GN=PADG_02764 PE=4 SV=2
C1G283	-1.80177	0.000293156	2846	0.000816787	0.000453324	60S ribosomal protein L2 OS=Paracoccidioides brasiliensis (strain Pb18) OX=502780 GN=PADG_02249 PE=4 SV=2
C1GH63	-1.77	0.00247132	599	0.000378182	0.000213662	40S ribosomal protein S25 OS=Paracoccidioides brasiliensis (strain Pb18) OX=502780 GN=PADG_06599 PE=4 SV=2
C1GJI6	-1.74186	0.000272259	1994	0.000945024	0.000542537	Uncharacterized protein OS=Paracoccidioides brasiliensis (strain Pb18) OX=502780 GN=PADG_07422 PE=3 SV=1
C1FZ38	-1.7372	0.00219207	1946	0.00100172	0.000576631	Phospholipase OS=Paracoccidioides brasiliensis (strain Pb18) OX=502780 GN=PADG_01064 PE=3 SV=1
C1FYR6	-1.71398	0.00147339	2393	0.000776519	0.000453049	40S ribosomal protein S7 OS=Paracoccidioides brasiliensis (strain Pb18) OX=502780 GN=PADG_00942 PE=3 SV=1
C1G2E1	-1.70397	0.00402885	1663	0.000423245	0.000248387	Uncharacterized protein OS=Paracoccidioides brasiliensis (strain Pb18) OX=502780 GN=PADG_02307 PE=4 SV=2
C1GJT8	-1.69967	1.52785e-05	444	0.000950999	0.00055952	Nucleoside diphosphate kinase OS=Paracoccidioides brasiliensis (strain Pb18) OX=502780 GN=PADG_07524 PE=3 SV=1
C1G9M7	-1.69274	1e-05	41	0.0012799	0.000756113	Uncharacterized protein OS=Paracoccidioides brasiliensis (strain Pb18) OX=502780 GN=PADG_03963 PE=3 SV=2
C1G4M6	-1.69229	0.000714682	2036	0.000420945	0.000248742	Uncharacterized protein OS=Paracoccidioides brasiliensis (strain Pb18) OX=502780 GN=PADG_01892 PE=4 SV=2
C1GEN5	-1.6811	1e-05	386	0.0021962	0.0013064	Uncharacterized protein OS=Paracoccidioides brasiliensis (strain Pb18) OX=502780 GN=PADG_05721 PE=4 SV=1; Additional IDs concatenated into MaxParsimony group: Reverse_C1G6X0
C1GHG3	-1.66894	0.00142063	126	0.000696539	0.000417354	Uncharacterized protein OS=Paracoccidioides brasiliensis (strain Pb18) OX=502780 GN=PADG_06699 PE=3 SV=1
C1GB65	-1.66619	0.00291909	116	0.000460201	0.0002762	Uncharacterized protein OS=Paracoccidioides brasiliensis (strain Pb18) OX=502780 GN=PADG_04866 PE=4 SV=2
C1GFT4	-1.64981	9.40575e-05	1940	0.000849893	0.000515145	Uncharacterized protein OS=Paracoccidioides brasiliensis (strain Pb18) OX=502780 GN=PADG_06120 PE=4 SV=2
C1GMI2	-1.61946	0.00134562	2907	0.000533831	0.000329636	4-hydroxyphenylpyruvate dioxygenase OS=Paracoccidioides brasiliensis (strain Pb18) OX=502780 GN=PADG_08468 PE=3 SV=1
C1GF71	-1.61378	1.62328e-05	460	0.000718265	0.000445083	Histone H2B OS=Paracoccidioides brasiliensis (strain Pb18) OX=502780 GN=PADG_05907 PE=3 SV=1
C1G3G3	-1.60836	0.000300429	1993	0.000956506	0.000594709	Gamma-glutamyltransferase OS=Paracoccidioides brasiliensis (strain Pb18) OX=502780 GN=PADG_01479 PE=4 SV=2
C1GMI0	-1.60773	1e-05	2377	0.00174326	0.0010843	Homogentisate 1,2-dioxygenase OS=Paracoccidioides brasiliensis (strain Pb18) OX=502780 GN=PADG_08466 PE=4 SV=1
C1GKI5	-1.60252	1e-05	1977	0.00146703	0.000915454	6-phosphogluconolactonase OS=Paracoccidioides brasiliensis (strain Pb18) OX=502780 GN=PADG_07771 PE=3 SV=1
C1GKL7	-1.59929	0.00130474	162	0.00036934	0.00023094	60S ribosomal protein L12 OS=Paracoccidioides brasiliensis (strain Pb18) OX=502780 GN=PADG_07803 PE=3 SV=2
C1G159	-1.59625	0.000210847	1593	0.000664924	0.000416553	26S protease regulatory subunit 6A OS=Paracoccidioides brasiliensis (strain Pb18) OX=502780 GN=PADG_00599 PE=3 SV=1
C1G9X0	-1.59429	0.000127536	1454	0.00177068	0.00111064	14-3-3 family protein epsilon OS=Paracoccidioides brasiliensis (strain Pb18) OX=502780 GN=PADG_04056 PE=3 SV=2
C1G347	-1.59399	1e-05	806	0.00100539	0.000630741	Uncharacterized protein OS=Paracoccidioides brasiliensis (strain Pb18) OX=502780 GN=PADG_01363 PE=4 SV=1
C1GBM4	-1.58018	0.000200345	470	0.000828342	0.000524207	Ribosomal protein L24 OS=Paracoccidioides brasiliensis (strain Pb18) OX=502780 GN=PADG_05025 PE=4 SV=1
C1G6T3	-1.57988	0.000454064	1203	0.000745522	0.000471885	60S ribosomal protein L6 OS=Paracoccidioides brasiliensis (strain Pb18) OX=502780 GN=PADG_02888 PE=3 SV=1
A0A0A0HRG7	-1.56966	0.000665066	388	0.000419148	0.000267032	Actin OS=Paracoccidioides brasiliensis (strain Pb18) OX=502780 GN=PADG_12076 PE=3 SV=1
C1G343	-1.5661	0.00134567	1693	0.000390644	0.000249437	Uncharacterized protein OS=Paracoccidioides brasiliensis (strain Pb18) OX=502780 GN=PADG_01359 PE=4 SV=1
C1G0P0	-1.56085	1e-05	4	0.00394057	0.00252463	Hsp7-like protein OS=Paracoccidioides brasiliensis (strain Pb18) OX=502780 GN=PADG_00430 PE=3 SV=1
C1G1S6	-1.55583	8.2549e-05	491	0.000787906	0.000506423	Uncharacterized protein OS=Paracoccidioides brasiliensis (strain Pb18) OX=502780 GN=PADG_02092 PE=4 SV=1
C1G3X8	-1.55556	2.89544e-05	863	0.000552656	0.000355279	Uncharacterized protein OS=Paracoccidioides brasiliensis (strain Pb18) OX=502780 GN=PADG_01644 PE=4 SV=1
C1GK20	-1.5454	0.000204403	2398	0.000974059	0.000630297	Uncharacterized protein OS=Paracoccidioides brasiliensis (strain Pb18) OX=502780 GN=PADG_07606 PE=4 SV=2
C1G1U8	-1.54391	0.000219618	178	0.000452778	0.000293267	Uncharacterized protein OS=Paracoccidioides brasiliensis (strain Pb18) OX=502780 GN=PADG_02114 PE=4 SV=2
C1GLV8	-1.54284	1.14501e-05	2366	0.0047746	0.00309468	ATP synthase subunit beta OS=Paracoccidioides brasiliensis (strain Pb18) OX=502780 GN=PADG_08349 PE=3 SV=1
C1GJS2	-1.54166	9.53235e-05	835	0.000945818	0.000613505	Uncharacterized protein OS=Paracoccidioides brasiliensis (strain Pb18) OX=502780 GN=PADG_07508 PE=4 SV=2
C1GL27	-1.54024	5.43944e-05	2428	0.000574604	0.000373062	Uncharacterized protein OS=Paracoccidioides brasiliensis (strain Pb18) OX=502780 GN=PADG_08034 PE=4 SV=1
C1GMF6	-1.53864	0.00105628	43	0.00105617	0.00068643	Proteasome subunit alpha type OS=Paracoccidioides brasiliensis (strain Pb18) OX=502780 GN=PADG_08442 PE=3 SV=1
C1GK29	-1.53583	0.00040225	1998	0.000750049	0.000488366	Uncharacterized protein OS=Paracoccidioides brasiliensis (strain Pb18) OX=502780 GN=PADG_07615 PE=3 SV=1
C1GL14	-1.53053	5.8165e-05	2420	0.000626548	0.000409367	Phospho-2-dehydro-3-deoxyheptonate aldolase, phenylalanine-inhibited OS=Paracoccidioides brasiliensis (strain Pb18) OX=502780 GN=PADG_08021 PE=4 SV=2
C1GLP7	-1.52924	0.000229255	1634	0.000626637	0.00040977	Uncharacterized protein OS=Paracoccidioides brasiliensis (strain Pb18) OX=502780 GN=PADG_08288 PE=3 SV=1
C1G651	-1.52576	0.000273709	845	0.000583736	0.000382588	Vacuolar protein sorting-associated protein 17 OS=Paracoccidioides brasiliensis (strain Pb18) OX=502780 GN=PADG_02656 PE=3 SV=1
C1GC82	-1.52554	2.40674e-05	701	0.00332161	0.00217733	Transketolase OS=Paracoccidioides brasiliensis (strain Pb18) OX=502780 GN=PADG_04604 PE=4 SV=2
C1G047	-1.52245	0.0025156	2850	0.000337895	0.000221942	Uncharacterized protein OS=Paracoccidioides brasiliensis (strain Pb18) OX=502780 GN=PADG_00237 PE=4 SV=1
C1GCJ6	-1.52031	1.36822e-05	382	0.00329885	0.00216986	2-methylcitrate dehydratase OS=Paracoccidioides brasiliensis (strain Pb18) OX=502780 GN=PADG_04718 PE=4 SV=2
C1GMW4	-1.52013	5.34612e-05	2394	0.000863358	0.00056795	Uncharacterized protein OS=Paracoccidioides brasiliensis (strain Pb18) OX=502780 GN=PADG_08615 PE=4 SV=2
C1GFA3	-1.51526	0.000156445	488	0.00059284	0.000391247	60S ribosomal protein L27a OS=Paracoccidioides brasiliensis (strain Pb18) OX=502780 GN=PADG_05939 PE=3 SV=1
C1GI92	-1.5098	0.00147856	99	0.000563729	0.000373379	Cytochrome c OS=Paracoccidioides brasiliensis (strain Pb18) OX=502780 GN=PADG_06978 PE=3 SV=2
C1G388	-1.5092	1e-05	776	0.00293978	0.00194791	Aspartate aminotransferase OS=Paracoccidioides brasiliensis (strain Pb18) OX=502780 GN=PADG_01404 PE=4 SV=1
C1GLB8	-1.50378	1e-05	773	0.00263686	0.00175349	Malate dehydrogenase, NAD-dependent OS=Paracoccidioides brasiliensis (strain Pb18) OX=502780 GN=PADG_08054 PE=3 SV=2
C1G5F6	-1.49992	1.03704e-05	772	0.00544079	0.00362738	Glyceraldehyde-3-phosphate dehydrogenase OS=Paracoccidioides brasiliensis (strain Pb18) OX=502780 GN=PADG_02411 PE=3 SV=1
C1GIA6	-1.49438	0.000930378	2443	0.000544618	0.000364445	GrpE protein homolog OS=Paracoccidioides brasiliensis (strain Pb18) OX=502780 GN=PADG_06992 PE=3 SV=1
C1GM15	-1.48999	3.24143e-05	1548	0.0019206	0.001289	O-acetylhomoserine (Thiol)-lyase OS=Paracoccidioides brasiliensis (strain Pb18) OX=502780 GN=PADG_08406 PE=3 SV=1
C1GKJ6	-1.48969	4.30537e-05	1234	0.000728329	0.000488912	Deoxyuridine 5'-triphosphate nucleotidohydrolase OS=Paracoccidioides brasiliensis (strain Pb18) OX=502780 GN=PADG_07782 PE=4 SV=2
C1GBN1	-1.48925	1e-05	810	0.00108735	0.000730132	Uncharacterized protein OS=Paracoccidioides brasiliensis (strain Pb18) OX=502780 GN=PADG_05032 PE=4 SV=2
C1GCB4	-1.47647	0.000130319	1207	0.000890827	0.000603349	Uncharacterized protein OS=Paracoccidioides brasiliensis (strain Pb18) OX=502780 GN=PADG_04636 PE=4 SV=2
C1G1D4	-1.47104	0.00317424	1198	0.000615897	0.000418682	Uncharacterized protein OS=Paracoccidioides brasiliensis (strain Pb18) OX=502780 GN=PADG_00674 PE=4 SV=1
C1G445	-1.47091	0.00231738	422	0.00134729	0.000915959	Uncharacterized protein OS=Paracoccidioides brasiliensis (strain Pb18) OX=502780 GN=PADG_01711 PE=4 SV=2
C1GF69	-1.4651	0.00828806	2445	0.000326586	0.00022291	Uncharacterized protein OS=Paracoccidioides brasiliensis (strain Pb18) OX=502780 GN=PADG_05905 PE=3 SV=1
C1G726	-1.46149	1.88109e-05	23	0.00189756	0.00129838	Uncharacterized protein OS=Paracoccidioides brasiliensis (strain Pb18) OX=502780 GN=PADG_02981 PE=4 SV=1
C1G0N2	-1.46135	1.51348e-05	2875	0.00139227	0.000952726	Uncharacterized protein OS=Paracoccidioides brasiliensis (strain Pb18) OX=502780 GN=PADG_00422 PE=4 SV=1
C1GLI2	-1.45971	1e-05	1535	0.00817704	0.00560182	Hsp72-like protein OS=Paracoccidioides brasiliensis (strain Pb18) OX=502780 GN=PADG_08118 PE=3 SV=1; Additional IDs concatenated into MaxParsimony group: contaminant_GR78_LYCES, contaminant_GR78_RAT, contaminant_GR78_MESAU, contaminant_GR78_HUMAN, contaminant_GR78_SCHPO, contaminant_GR78_KLULA
C1FZK4	-1.45545	0.000336765	2864	0.000634514	0.000435958	Uncharacterized protein OS=Paracoccidioides brasiliensis (strain Pb18) OX=502780 GN=PADG_00044 PE=4 SV=1
C1GCG8	-1.45414	0.00234788	1670	0.000296995	0.000204241	Uncharacterized protein OS=Paracoccidioides brasiliensis (strain Pb18) OX=502780 GN=PADG_04690 PE=4 SV=2
A0A0A0HT80	-1.45387	0.000397311	1843	0.00116488	0.000801226	60S ribosomal protein L13 OS=Paracoccidioides brasiliensis (strain Pb18) OX=502780 GN=PADG_11227 PE=3 SV=1
C1GIX4	-1.45239	1e-05	1931	0.00340899	0.00234716	Malate dehydrogenase OS=Paracoccidioides brasiliensis (strain Pb18) OX=502780 GN=PADG_07210 PE=3 SV=1
C1G8H6	-1.45206	1e-05	2	0.00262236	0.00180596	Chaperone DnaK OS=Paracoccidioides brasiliensis (strain Pb18) OX=502780 GN=PADG_03562 PE=3 SV=1
C1GF01	-1.4494	0.000190157	1842	0.000954936	0.000658851	E3 ubiquitin ligase complex SCF subunit sconC OS=Paracoccidioides brasiliensis (strain Pb18) OX=502780 GN=PADG_05837 PE=3 SV=2
C1GI20	-1.43707	0.000798425	1056	0.00217572	0.001514	Triosephosphate isomerase OS=Paracoccidioides brasiliensis (strain Pb18) OX=502780 GN=PADG_06906 PE=3 SV=2
C1G820	-1.4365	0.000513957	1228	0.000613268	0.000426919	Uncharacterized protein OS=Paracoccidioides brasiliensis (strain Pb18) OX=502780 GN=PADG_03325 PE=4 SV=1
C1GA81	-1.43346	7.30371e-05	787	0.00153058	0.00106776	Uncharacterized protein OS=Paracoccidioides brasiliensis (strain Pb18) OX=502780 GN=PADG_04167 PE=4 SV=1
A0A0A0HW92	-1.43304	0.00095715	2835	0.00137351	0.000958458	Uncharacterized protein OS=Paracoccidioides brasiliensis (strain Pb18) OX=502780 GN=PADG_11111 PE=4 SV=1
C1G505	-1.43199	0.00566309	2327	0.00041872	0.000292404	Uncharacterized protein OS=Paracoccidioides brasiliensis (strain Pb18) OX=502780 GN=PADG_02021 PE=4 SV=2
C1GG95	-1.43166	3.26278e-05	2839	0.0012218	0.000853419	Pro-apoptotic serine protease OS=Paracoccidioides brasiliensis (strain Pb18) OX=502780 GN=PADG_06332 PE=4 SV=2
C1GA02	-1.42653	0.000788379	2887	0.000966558	0.00067756	Uncharacterized protein OS=Paracoccidioides brasiliensis (strain Pb18) OX=502780 GN=PADG_04088 PE=4 SV=1
C1GCD5	-1.42442	0.005386	20	0.00152162	0.00106824	Nascent polypeptide-associated complex subunit beta OS=Paracoccidioides brasiliensis (strain Pb18) OX=502780 GN=PADG_04657 PE=3 SV=2
C1GAK2	-1.42362	0.000231058	37	0.00139187	0.000977696	Uncharacterized protein OS=Paracoccidioides brasiliensis (strain Pb18) OX=502780 GN=PADG_04288 PE=4 SV=2
C1GJZ6	-1.42261	0.000464138	77	0.000759467	0.000533855	Phenylalanine-tRNA ligase, alpha subunit OS=Paracoccidioides brasiliensis (strain Pb18) OX=502780 GN=PADG_07582 PE=4 SV=2
C1G8H3	-1.42025	0.000495424	2886	0.000719544	0.000506633	Uncharacterized protein OS=Paracoccidioides brasiliensis (strain Pb18) OX=502780 GN=PADG_03559 PE=3 SV=1
C1G678	-1.41757	4.89738e-05	1950	0.000656145	0.000462867	UV excision repair protein Rad23 OS=Paracoccidioides brasiliensis (strain Pb18) OX=502780 GN=PADG_02683 PE=4 SV=1
C1GMV8	-1.4145	0.000736123	412	0.00109506	0.00077417	40S ribosomal protein S2 OS=Paracoccidioides brasiliensis (strain Pb18) OX=502780 GN=PADG_08602 PE=3 SV=1
C1GGS8	-1.40728	0.000341548	2831	0.00202807	0.00144113	Uncharacterized protein OS=Paracoccidioides brasiliensis (strain Pb18) OX=502780 GN=PADG_06515 PE=4 SV=1
C1G712	-1.40362	1e-05	1138	0.00262278	0.00186858	Uncharacterized protein OS=Paracoccidioides brasiliensis (strain Pb18) OX=502780 GN=PADG_02967 PE=4 SV=1
C1GJI4	-1.4011	1e-05	2389	0.0012711	0.000907214	Transaldolase OS=Paracoccidioides brasiliensis (strain Pb18) OX=502780 GN=PADG_07420 PE=4 SV=2
C1G8D0	-1.40047	0.000605269	1957	0.000623268	0.000445042	NADH-ubiquinone oxidoreductase 30.4 kDa subunit, mitochondrial OS=Paracoccidioides brasiliensis (strain Pb18) OX=502780 GN=PADG_03516 PE=3 SV=1
C1GGZ4	-1.38836	0.00136805	2392	0.00111023	0.000799667	Phosphoserine transaminase OS=Paracoccidioides brasiliensis (strain Pb18) OX=502780 GN=PADG_06213 PE=3 SV=1
C1G5V6	-1.3879	0.000528626	775	0.00304444	0.00219356	ATP synthase subunit alpha OS=Paracoccidioides brasiliensis (strain Pb18) OX=502780 GN=PADG_02561 PE=3 SV=1
C1G9P7	-1.3878	1e-05	1991	0.000963011	0.000693912	6,7-dimethyl-8-ribityllumazine synthase OS=Paracoccidioides brasiliensis (strain Pb18) OX=502780 GN=PADG_03983 PE=3 SV=1
C1GGX7	-1.38645	5.62094e-05	2370	0.00234391	0.00169059	Uncharacterized protein OS=Paracoccidioides brasiliensis (strain Pb18) OX=502780 GN=PADG_06196 PE=4 SV=2
C1G371	-1.38551	0.000188079	2383	0.00114628	0.000827332	60S ribosomal protein L7 OS=Paracoccidioides brasiliensis (strain Pb18) OX=502780 GN=PADG_01387 PE=4 SV=1
C1G6I0	-1.38276	1e-05	1136	0.00373855	0.00270369	Uncharacterized protein OS=Paracoccidioides brasiliensis (strain Pb18) OX=502780 GN=PADG_02785 PE=3 SV=2
C1GG99	-1.3787	0.00528354	499	0.000540546	0.000392068	Reticulon-like protein OS=Paracoccidioides brasiliensis (strain Pb18) OX=502780 GN=PADG_06336 PE=4 SV=2
C1GCX3	-1.37863	0.000616595	1979	0.00173859	0.0012611	2,3-bisphosphoglycerate-independent phosphoglycerate mutase OS=Paracoccidioides brasiliensis (strain Pb18) OX=502780 GN=PADG_05109 PE=3 SV=1
C1G489	-1.37477	0.000741207	45	0.00114817	0.000835174	Superoxide dismutase OS=Paracoccidioides brasiliensis (strain Pb18) OX=502780 GN=PADG_01755 PE=3 SV=1
C1GBJ3	-1.37164	0.000222081	1980	0.00151484	0.0011044	Uncharacterized protein OS=Paracoccidioides brasiliensis (strain Pb18) OX=502780 GN=PADG_04994 PE=4 SV=1
C1G172	-1.36779	0.00148223	2824	0.000328989	0.000240525	Uncharacterized protein OS=Paracoccidioides brasiliensis (strain Pb18) OX=502780 GN=PADG_00612 PE=4 SV=2
C1GCK7	-1.36707	0.00127532	1579	0.000766225	0.000560489	ATP synthase subunit d, mitochondrial OS=Paracoccidioides brasiliensis (strain Pb18) OX=502780 GN=PADG_04729 PE=3 SV=1
C1GKX2	-1.36402	0.00244361	1252	0.000533097	0.000390828	Uncharacterized protein OS=Paracoccidioides brasiliensis (strain Pb18) OX=502780 GN=PADG_07979 PE=4 SV=1
C1G5X3	-1.36308	0.00261604	1952	0.000582041	0.000427005	ATP synthase subunit 4, mitochondrial OS=Paracoccidioides brasiliensis (strain Pb18) OX=502780 GN=PADG_02578 PE=4 SV=1
C1G9X3	-1.35964	0.000132871	6	0.00440223	0.00323779	Enolase OS=Paracoccidioides brasiliensis (strain Pb18) OX=502780 GN=PADG_04059 PE=3 SV=1
C1G4D1	-1.35815	0.00326235	2833	0.000796538	0.00058649	Dihydrolipoamide acetyltransferase component of pyruvate dehydrogenase complex OS=Paracoccidioides brasiliensis (strain Pb18) OX=502780 GN=PADG_01797 PE=3 SV=2
C1GKC9	-1.35143	4.0572e-05	1967	0.00565702	0.00418595	Hsp90-like protein OS=Paracoccidioides brasiliensis (strain Pb18) OX=502780 GN=PADG_07715 PE=3 SV=2
C1GC37	-1.34935	0.000660882	1645	0.000348209	0.000258057	Uncharacterized protein OS=Paracoccidioides brasiliensis (strain Pb18) OX=502780 GN=PADG_04559 PE=3 SV=1
C1GGQ1	-1.34581	5.12161e-05	1542	0.0022488	0.00167096	Uncharacterized protein OS=Paracoccidioides brasiliensis (strain Pb18) OX=502780 GN=PADG_06488 PE=4 SV=1
C1FYY4	-1.34328	0.000140541	1546	0.00225893	0.00168166	Uncharacterized protein OS=Paracoccidioides brasiliensis (strain Pb18) OX=502780 GN=PADG_01010 PE=4 SV=1
C1G784	-1.34302	0.00254944	2881	0.00117157	0.000872341	MICOS complex subunit MIC60 OS=Paracoccidioides brasiliensis (strain Pb18) OX=502780 GN=MIC60 PE=3 SV=2
C1G3C4	-1.34214	0.000212311	1984	0.00108631	0.000809384	ADP,ATP carrier protein OS=Paracoccidioides brasiliensis (strain Pb18) OX=502780 GN=PADG_01440 PE=3 SV=2
C1FYR1	-1.3418	0.0058565	1170	0.000858284	0.000639652	Uncharacterized protein OS=Paracoccidioides brasiliensis (strain Pb18) OX=502780 GN=PADG_00937 PE=4 SV=1
C1G0X4	-1.34026	6.565e-05	2436	0.000523666	0.000390721	60S ribosomal protein L16 OS=Paracoccidioides brasiliensis (strain Pb18) OX=502780 GN=PADG_00514 PE=3 SV=1
C1G4K1	-1.33822	0.000272738	1844	0.000808487	0.000604151	Uncharacterized protein OS=Paracoccidioides brasiliensis (strain Pb18) OX=502780 GN=PADG_01867 PE=4 SV=2
C1G659	-1.33754	0.000407471	2880	0.000951835	0.000711632	Uncharacterized protein OS=Paracoccidioides brasiliensis (strain Pb18) OX=502780 GN=PADG_02664 PE=4 SV=1
C1GFW9	-1.33707	0.000215886	2000	0.00082038	0.000613567	Uncharacterized protein OS=Paracoccidioides brasiliensis (strain Pb18) OX=502780 GN=PADG_06155 PE=4 SV=1
C1GIV4	-1.32463	0.00014333	1212	0.000706968	0.000533708	Proteasome endopeptidase complex OS=Paracoccidioides brasiliensis (strain Pb18) OX=502780 GN=PADG_07190 PE=3 SV=2
C1GG28	-1.32138	7.56697e-05	16	0.00217214	0.00164384	Uncharacterized protein OS=Paracoccidioides brasiliensis (strain Pb18) OX=502780 GN=PADG_06265 PE=4 SV=1
C1G2H7	-1.31982	0.00509321	1987	0.00126891	0.000961429	Uncharacterized protein OS=Paracoccidioides brasiliensis (strain Pb18) OX=502780 GN=PADG_02343 PE=4 SV=2
C1G5Y7	-1.31885	0.000322012	2367	0.00282318	0.00214063	Uncharacterized protein OS=Paracoccidioides brasiliensis (strain Pb18) OX=502780 GN=PADG_02592 PE=4 SV=1
C1G9C0	-1.31628	0.00637694	1624	0.000563249	0.000427911	Ribosomal protein L15 OS=Paracoccidioides brasiliensis (strain Pb18) OX=502780 GN=PADG_03856 PE=3 SV=1
C1GIX7	-1.31261	0.000184988	1049	0.00191455	0.00145858	Acetyltransferase component of pyruvate dehydrogenase complex OS=Paracoccidioides brasiliensis (strain Pb18) OX=502780 GN=PADG_07213 PE=3 SV=2
C1GMU5	-1.31145	0.00462683	103	0.000595583	0.000454142	Uncharacterized protein OS=Paracoccidioides brasiliensis (strain Pb18) OX=502780 GN=PADG_08589 PE=4 SV=2
C1GHE4	-1.3088	0.00332501	2405	0.000745925	0.000569929	40S ribosomal protein S22 OS=Paracoccidioides brasiliensis (strain Pb18) OX=502780 GN=PADG_06680 PE=3 SV=1
C1FZ74	-1.30732	0.00717105	1201	0.000673517	0.000515189	Uracil phosphoribosyltransferase OS=Paracoccidioides brasiliensis (strain Pb18) OX=502780 GN=PADG_01100 PE=4 SV=2
C1G056	-1.29907	0.000103593	407	0.00144419	0.00111171	Pyruvate dehydrogenase E1 component subunit beta OS=Paracoccidioides brasiliensis (strain Pb18) OX=502780 GN=PADG_00246 PE=4 SV=1
C1GH70	-1.2922	0.00836795	853	0.000573966	0.000444178	Uncharacterized protein OS=Paracoccidioides brasiliensis (strain Pb18) OX=502780 GN=PADG_06606 PE=4 SV=2
C1GL98	-1.29147	0.000183875	2866	0.00156075	0.00120851	Polyadenylate-binding protein OS=Paracoccidioides brasiliensis (strain Pb18) OX=502780 GN=PADG_07884 PE=3 SV=2
C1GG53	-1.28914	0.00725462	2845	0.000858968	0.000666309	Proteasome endopeptidase complex OS=Paracoccidioides brasiliensis (strain Pb18) OX=502780 GN=PADG_06290 PE=3 SV=1
C1G248	-1.28737	9.57111e-05	1969	0.00375485	0.00291667	4-aminobutyrate aminotransferase OS=Paracoccidioides brasiliensis (strain Pb18) OX=502780 GN=PADG_02214 PE=3 SV=2
C1G0R1	-1.28605	0.000117541	2825	0.0017943	0.0013952	Glucose-6-phosphate isomerase OS=Paracoccidioides brasiliensis (strain Pb18) OX=502780 GN=PADG_00451 PE=3 SV=1
A0A0A0HV97	-1.28319	1e-05	2378	0.00163105	0.00127109	Uncharacterized protein OS=Paracoccidioides brasiliensis (strain Pb18) OX=502780 GN=PADG_11950 PE=4 SV=1
C1G3G7	-1.2831	0.00018135	1149	0.00153888	0.00119935	Isocitrate lyase OS=Paracoccidioides brasiliensis (strain Pb18) OX=502780 GN=PADG_01483 PE=3 SV=1
C1FZ26	-1.28302	0.00525831	1958	0.000502598	0.000391732	Uncharacterized protein OS=Paracoccidioides brasiliensis (strain Pb18) OX=502780 GN=PADG_01052 PE=4 SV=1
C1G356	-1.28229	0.00293875	1974	0.0014499	0.00113071	Mannitol-1-phosphate 5-dehydrogenase OS=Paracoccidioides brasiliensis (strain Pb18) OX=502780 GN=PADG_01372 PE=3 SV=1
C1GM03	-1.28193	0.000149197	1551	0.00143437	0.00111892	Uncharacterized protein OS=Paracoccidioides brasiliensis (strain Pb18) OX=502780 GN=PADG_08394 PE=4 SV=1
C1GAA6	-1.28089	0.000305375	1577	0.00080891	0.00063152	Uncharacterized protein OS=Paracoccidioides brasiliensis (strain Pb18) OX=502780 GN=PADG_04192 PE=3 SV=2
C1G194	-1.28029	0.000390315	2408	0.000912335	0.000712601	Vacuolar protease A OS=Paracoccidioides brasiliensis (strain Pb18) OX=502780 GN=PADG_00634 PE=3 SV=1
C1G4R9	-1.2797	0.0078018	854	0.000512246	0.000400286	Uncharacterized protein OS=Paracoccidioides brasiliensis (strain Pb18) OX=502780 GN=PADG_01935 PE=4 SV=1
C1G6D0	-1.27955	0.000172809	34	0.00122931	0.000960734	Proteasome subunit alpha type OS=Paracoccidioides brasiliensis (strain Pb18) OX=502780 GN=PADG_02735 PE=3 SV=1
C1GCI8	-1.27905	0.000312589	2373	0.00241033	0.00188447	Citrate synthase OS=Paracoccidioides brasiliensis (strain Pb18) OX=502780 GN=PADG_04710 PE=3 SV=1
C1GC56	-1.27486	0.00401682	837	0.000533601	0.000418556	Uncharacterized protein OS=Paracoccidioides brasiliensis (strain Pb18) OX=502780 GN=PADG_04578 PE=4 SV=2
C1G0H6	-1.27481	0.00222339	2400	0.000759429	0.00059572	Uncharacterized protein OS=Paracoccidioides brasiliensis (strain Pb18) OX=502780 GN=PADG_00366 PE=4 SV=2
C1GMH9	-1.27404	0.000660761	2376	0.00206191	0.0016184	Fumarylacetoacetase OS=Paracoccidioides brasiliensis (strain Pb18) OX=502780 GN=PADG_08465 PE=3 SV=1
C1GK84	-1.27331	0.000522955	831	0.000543653	0.000426962	Uncharacterized protein OS=Paracoccidioides brasiliensis (strain Pb18) OX=502780 GN=PADG_07670 PE=4 SV=1
C1GIF6	-1.27309	0.00474222	1944	0.000657352	0.000516346	ATP synthase F1, delta subunit OS=Paracoccidioides brasiliensis (strain Pb18) OX=502780 GN=PADG_07042 PE=3 SV=1
C1G8T5	-1.2716	0.000742102	61	0.000667652	0.000525049	Uncharacterized protein OS=Paracoccidioides brasiliensis (strain Pb18) OX=502780 GN=PADG_03671 PE=4 SV=1
C1GEU2	-1.27154	0.00159906	770	0.00148995	0.00117176	Glycogen [starch] synthase OS=Paracoccidioides brasiliensis (strain Pb18) OX=502780 GN=PADG_05778 PE=3 SV=1
C1GB04	-1.27082	5.43139e-05	2293	0.00320863	0.00252486	Uncharacterized protein OS=Paracoccidioides brasiliensis (strain Pb18) OX=502780 GN=PADG_04440 PE=3 SV=1
C1GCK9	-1.27067	0.000165346	1595	0.000553749	0.000435791	Uncharacterized protein OS=Paracoccidioides brasiliensis (strain Pb18) OX=502780 GN=PADG_04731 PE=4 SV=1
C1GBD8	-1.26992	0.00309574	36	0.0014099	0.00111023	Succinyl-CoA:3-ketoacid-coenzyme A transferase OS=Paracoccidioides brasiliensis (strain Pb18) OX=502780 GN=PADG_04939 PE=3 SV=1
C1G9M9	-1.26861	0.00086635	1975	0.00124088	0.00097814	Proteasome subunit beta OS=Paracoccidioides brasiliensis (strain Pb18) OX=502780 GN=PADG_03965 PE=3 SV=1
C1GLZ6	-1.26773	0.000132366	768	0.00162299	0.00128023	Citrate synthase OS=Paracoccidioides brasiliensis (strain Pb18) OX=502780 GN=PADG_08387 PE=3 SV=1
C1G2P3	-1.26159	0.00221798	2826	0.00103259	0.000818484	Uncharacterized protein OS=Paracoccidioides brasiliensis (strain Pb18) OX=502780 GN=PADG_01209 PE=3 SV=1
C1GN78	-1.26131	0.00572733	498	0.000481128	0.00038145	Uncharacterized protein OS=Paracoccidioides brasiliensis (strain Pb18) OX=502780 GN=PADG_08715 PE=4 SV=1
C1G054	-1.25984	0.00755845	436	0.000972731	0.000772109	Uncharacterized protein OS=Paracoccidioides brasiliensis (strain Pb18) OX=502780 GN=PADG_00244 PE=4 SV=1
C1GFJ7	-1.2577	0.000281356	2390	0.0012421	0.000987597	Uncharacterized protein OS=Paracoccidioides brasiliensis (strain Pb18) OX=502780 GN=PADG_06033 PE=4 SV=1
A0A0A0HWK8	-1.25609	0.000584267	2822	0.002335	0.00185895	Actin OS=Paracoccidioides brasiliensis (strain Pb18) OX=502780 GN=PADG_12077 PE=3 SV=1
C1G0E5	-1.25515	0.00331864	1982	0.00119576	0.000952683	40S ribosomal protein S14 OS=Paracoccidioides brasiliensis (strain Pb18) OX=502780 GN=PADG_00335 PE=3 SV=1
C1GDK2	-1.25512	0.00372241	1960	0.000491378	0.000391499	60S ribosomal protein L18-B OS=Paracoccidioides brasiliensis (strain Pb18) OX=502780 GN=PADG_05338 PE=4 SV=2
C1G540	-1.25481	0.00110158	1602	0.000524043	0.000417628	Ribosomal protein L7/L12 OS=Paracoccidioides brasiliensis (strain Pb18) OX=502780 GN=PADG_02056 PE=3 SV=2
C1GF57	-1.2488	1e-05	2853	0.00239936	0.00192134	Uncharacterized protein OS=Paracoccidioides brasiliensis (strain Pb18) OX=502780 GN=PADG_05893 PE=3 SV=1
C1GAG3	-1.24539	0.0051084	2877	0.00150709	0.00121013	Isocitrate dehydrogenase [NADP] OS=Paracoccidioides brasiliensis (strain Pb18) OX=502780 GN=PADG_04249 PE=3 SV=2
C1G9C3	-1.24479	0.00531985	452	0.000553588	0.000444723	Chlorophyll synthesis pathway protein BchC OS=Paracoccidioides brasiliensis (strain Pb18) OX=502780 GN=PADG_03859 PE=3 SV=2
C1GE37	-1.24445	0.000297575	1976	0.00142773	0.00114728	Uncharacterized protein OS=Paracoccidioides brasiliensis (strain Pb18) OX=502780 GN=PADG_05523 PE=4 SV=1
C1G5L1	-1.24159	0.00613689	123	0.000452126	0.000364151	Uncharacterized protein OS=Paracoccidioides brasiliensis (strain Pb18) OX=502780 GN=PADG_02466 PE=4 SV=1
C1GGQ7	-1.23635	0.00218353	1973	0.00190319	0.00153936	Dihydrolipoyl dehydrogenase OS=Paracoccidioides brasiliensis (strain Pb18) OX=502780 GN=PADG_06494 PE=3 SV=1
C1GGQ7	-1.23272	0.00292416	1058	0.00145817	0.00118289	1,4-alpha-glucan-branching enzyme OS=Paracoccidioides brasiliensis (strain Pb18) OX=502780 GN=PADG_12426 PE=4 SV=1
C1GFM6	-1.23197	0.000184417	1144	0.00189599	0.00153899	Sulfate adenylyltransferase OS=Paracoccidioides brasiliensis (strain Pb18) OX=502780 GN=MET3 PE=3 SV=2
C1GMU8	-1.23138	0.00649609	2442	0.000481231	0.000390805	Uncharacterized protein OS=Paracoccidioides brasiliensis (strain Pb18) OX=502780 GN=PADG_08592 PE=3 SV=1
C1FYH3	-1.2289	0.00256753	426	0.00112497	0.000915433	Uncharacterized protein OS=Paracoccidioides brasiliensis (strain Pb18) OX=502780 GN=PADG_00849 PE=4 SV=1
C1GDK5	-1.22645	0.000576204	1146	0.00190639	0.00155439	Uncharacterized protein OS=Paracoccidioides brasiliensis (strain Pb18) OX=502780 GN=PADG_05341 PE=4 SV=2
C1G7J4	-1.22618	0.00060564	384	0.00192803	0.00157238	Aminopeptidase OS=Paracoccidioides brasiliensis (strain Pb18) OX=502780 GN=PADG_03149 PE=3 SV=1
C1G1C8	-1.22541	0.00165246	2368	0.00253868	0.00207169	Fructose-bisphosphate aldolase OS=Paracoccidioides brasiliensis (strain Pb18) OX=502780 GN=PADG_00668 PE=3 SV=1
C1FZZ3	-1.22194	0.00160234	1556	0.00129376	0.00105878	Profilin OS=Paracoccidioides brasiliensis (strain Pb18) OX=502780 GN=PADG_00183 PE=3 SV=2
C1G3L4	-1.21822	0.00134787	21	0.00178714	0.00146701	Guanine nucleotide-binding protein subunit beta-like protein OS=Paracoccidioides brasiliensis (strain Pb18) OX=502780 GN=PADG_01530 PE=4 SV=2
C1GJJ9	-1.21804	0.00600007	1550	0.00122201	0.00100326	Uncharacterized protein OS=Paracoccidioides brasiliensis (strain Pb18) OX=502780 GN=PADG_07435 PE=4 SV=1
A0A0A0HUX3	-1.21743	0.00562814	33	0.00129951	0.00106742	Proliferating cell nuclear antigen OS=Paracoccidioides brasiliensis (strain Pb18) OX=502780 GN=PADG_11679 PE=3 SV=1
C1G9P6	-1.21311	1e-05	809	0.000830444	0.000684557	Proteasome endopeptidase complex OS=Paracoccidioides brasiliensis (strain Pb18) OX=502780 GN=PADG_03982 PE=3 SV=2
C1G2W2	-1.21091	0.000888024	17	0.00214184	0.00176879	Pyruvate kinase OS=Paracoccidioides brasiliensis (strain Pb18) OX=502780 GN=PADG_01278 PE=3 SV=1
C1G4N0	-1.21067	0.000122854	1934	0.00268204	0.00221533	Phosphoglycerate kinase OS=Paracoccidioides brasiliensis (strain Pb18) OX=502780 GN=PADG_01896 PE=3 SV=1
C1GM00	-1.20864	0.00202239	2876	0.00175307	0.00145044	Plasma membrane ATPase OS=Paracoccidioides brasiliensis (strain Pb18) OX=502780 GN=PADG_08391 PE=3 SV=1
C1GBD6	-1.20319	0.00402323	88	0.000513717	0.000426962	Uncharacterized protein OS=Paracoccidioides brasiliensis (strain Pb18) OX=502780 GN=PADG_04937 PE=4 SV=1
C1GGT8	-1.19108	0.000841009	769	0.00122879	0.00103166	40S ribosomal protein S1 OS=Paracoccidioides brasiliensis (strain Pb18) OX=502780 GN=RPS1 PE=3 SV=1
C1G065	-1.18584	1e-05	5	0.00670563	0.00565475	Uncharacterized protein OS=Paracoccidioides brasiliensis (strain Pb18) OX=502780 GN=PADG_00255 PE=3 SV=1
C1G7K8	-1.1849	0.00189516	792	0.00112776	0.000951779	Peroxidase OS=Paracoccidioides brasiliensis (strain Pb18) OX=502780 GN=PADG_03163 PE=3 SV=1
C1FZG2	-1.18394	0.000462583	1540	0.00235799	0.00199164	Alanine--tRNA ligase OS=Paracoccidioides brasiliensis (strain Pb18) OX=502780 GN=ALA1 PE=3 SV=2
C1GAU3	-1.181	0.00104621	1972	0.0020476	0.00173379	Uncharacterized protein OS=Paracoccidioides brasiliensis (strain Pb18) OX=502780 GN=PADG_04379 PE=4 SV=1
C1G0Q0	-1.1803	0.00209138	2827	0.000809025	0.000685442	Uncharacterized protein OS=Paracoccidioides brasiliensis (strain Pb18) OX=502780 GN=PADG_00440 PE=4 SV=2
C1GA62	-1.17998	0.00237149	1971	0.00215305	0.00182464	Uncharacterized protein OS=Paracoccidioides brasiliensis (strain Pb18) OX=502780 GN=PADG_04148 PE=4 SV=1
C1G1M5	-1.1721	0.000974785	2371	0.00241746	0.00206251	Hsp98-like protein OS=Paracoccidioides brasiliensis (strain Pb18) OX=502780 GN=PADG_00765 PE=3 SV=2
C1GKV7	-1.17205	0.00158851	844	0.000553148	0.000471949	Uncharacterized protein OS=Paracoccidioides brasiliensis (strain Pb18) OX=502780 GN=PADG_07964 PE=3 SV=2
C1GDH4	-1.17073	0.00166101	1978	0.0014573	0.00124477	Leukotriene A(4) hydrolase OS=Paracoccidioides brasiliensis (strain Pb18) OX=502780 GN=PADG_05310 PE=3 SV=1
C1GBJ2	-1.1689	0.000322469	391	0.00169434	0.00144952	ATP-citrate synthase subunit 1 OS=Paracoccidioides brasiliensis (strain Pb18) OX=502780 GN=PADG_04993 PE=4 SV=1
C1G1J4	1.1198	1e-05	700	0.00208007	0.00232926	Urea carboxylase OS=Paracoccidioides brasiliensis (strain Pb18) OX=502780 GN=PADG_00734 PE=4 SV=1
C1G5S8	1.18218	0.00011119	2385	0.00130047	0.00153739	Uncharacterized protein OS=Paracoccidioides brasiliensis (strain Pb18) OX=502780 GN=PADG_02533 PE=4 SV=1
C1G6E6	1.18922	0.000730321	2829	0.000986117	0.00117271	Uncharacterized protein OS=Paracoccidioides brasiliensis (strain Pb18) OX=502780 GN=PADG_02751 PE=3 SV=1
C1G898	1.22645	0.00251647	1852	0.000544139	0.00066736	Uncharacterized protein OS=Paracoccidioides brasiliensis (strain Pb18) OX=502780 GN=PADG_03403 PE=3 SV=1
C1GF43	1.23041	0.00748807	2335	0.000368912	0.000453912	Eukaryotic peptide chain release factor subunit 1 OS=Paracoccidioides brasiliensis (strain Pb18) OX=502780 GN=PADG_05879 PE=4 SV=1
C1FYF6	1.23302	0.00320189	790	0.000728163	0.00089784	Adenylosuccinate synthetase OS=Paracoccidioides brasiliensis (strain Pb18) OX=502780 GN=PADG_00832 PE=3 SV=1
C1GAM6	1.23861	0.00107618	22	0.00119161	0.00147595	Uncharacterized protein OS=Paracoccidioides brasiliensis (strain Pb18) OX=502780 GN=PADG_04312 PE=4 SV=1
C1GLU6	1.2393	0.00288809	1164	0.000646196	0.000800827	GTP-binding protein rhoA OS=Paracoccidioides brasiliensis (strain Pb18) OX=502780 GN=PADG_08337 PE=4 SV=1
C1GEQ3	1.24366	0.00178326	408	0.000737007	0.000916589	Uncharacterized protein OS=Paracoccidioides brasiliensis (strain Pb18) OX=502780 GN=PADG_05739 PE=3 SV=2
C1GJM4	1.24843	0.00415563	786	0.000889977	0.00111107	Uncharacterized protein OS=Paracoccidioides brasiliensis (strain Pb18) OX=502780 GN=PADG_07460 PE=3 SV=1
C1GKB3	1.24973	0.00708839	406	0.000739953	0.000924745	S-formylglutathione hydrolase OS=Paracoccidioides brasiliensis (strain Pb18) OX=502780 GN=PADG_07699 PE=3 SV=1
A0A0A0HRM2	1.25051	0.000245359	1981	0.00129419	0.0016184	V-type proton ATPase catalytic subunit A OS=Paracoccidioides brasiliensis (strain Pb18) OX=502780 GN=PADG_11981 PE=3 SV=1
C1GFB5	1.25171	0.00688347	101	0.000298312	0.000373399	Uncharacterized protein OS=Paracoccidioides brasiliensis (strain Pb18) OX=502780 GN=PADG_05951 PE=4 SV=1
C1FYP6	1.25203	0.00638455	1847	0.000645883	0.000808662	Uncharacterized protein OS=Paracoccidioides brasiliensis (strain Pb18) OX=502780 GN=PADG_00922 PE=4 SV=1
C1G8X4	1.2577	0.000397892	2885	0.000842054	0.00105905	Uncharacterized protein OS=Paracoccidioides brasiliensis (strain Pb18) OX=502780 GN=PADG_03710 PE=4 SV=1
C1G579	1.26832	0.00400971	1929	0.000603115	0.000764942	Isopentenyl-diphosphate delta-isomerase OS=Paracoccidioides brasiliensis (strain Pb18) OX=502780 GN=PADG_03449 PE=4 SV=1
C1GCZ3	1.27411	0.000818896	2869	0.00152176	0.00193889	Uncharacterized protein OS=Paracoccidioides brasiliensis (strain Pb18) OX=502780 GN=PADG_05129 PE=4 SV=1
A0A0A0HYM8	1.27743	0.00284558	2306	0.000390267	0.000498539	Ribose-phosphate pyrophosphokinase 3 OS=Paracoccidioides brasiliensis (strain Pb18) OX=502780 GN=PADG_11296 PE=4 SV=1
C1G5P0	1.2791	5.67333e-05	29	0.00131343	0.00168002	Uncharacterized protein OS=Paracoccidioides brasiliensis (strain Pb18) OX=502780 GN=PADG_02495 PE=4 SV=1
C1G072	1.28216	0.000687472	2319	0.000429423	0.000550588	Inositol-1-monophosphatase OS=Paracoccidioides brasiliensis (strain Pb18) OX=502780 GN=PADG_00262 PE=3 SV=1
C1GHZ0	1.28684	0.000198192	2843	0.000849287	0.00109289	3-hydroxyisobutyryl-CoA hydrolase, mitochondrial OS=Paracoccidioides brasiliensis (strain Pb18) OX=502780 GN=PADG_06876 PE=3 SV=2
C1FYE5	1.29116	0.00285888	1139	0.00142477	0.00183961	Glutamate-tRNA ligase OS=Paracoccidioides brasiliensis (strain Pb18) OX=502780 GN=PADG_00821 PE=3 SV=1
C1G280	1.29399	0.00542587	1578	0.000418605	0.000541672	Uncharacterized protein OS=Paracoccidioides brasiliensis (strain Pb18) OX=502780 GN=PADG_02246 PE=4 SV=2
A0A0A0HWY2	1.29584	0.00578785	2865	0.000811076	0.00105102	Uncharacterized protein OS=Paracoccidioides brasiliensis (strain Pb18) OX=502780 GN=PADG_11413 PE=4 SV=1
C1GJZ9	1.29825	0.00764471	1568	0.000726176	0.000942757	Inosine-5'-monophosphate dehydrogenase OS=Paracoccidioides brasiliensis (strain Pb18) OX=502780 GN=PADG_07585 PE=3 SV=1
C1G0C5	1.30728	0.000875113	1152	0.000788808	0.0010312	Carbonic anhydrase OS=Paracoccidioides brasiliensis (strain Pb18) OX=502780 GN=PADG_00315 PE=3 SV=1
C1GF39	1.30794	0.00268371	492	0.000319494	0.00041788	Centromere/microtubule-binding protein cbf5 OS=Paracoccidioides brasiliensis (strain Pb18) OX=502780 GN=PADG_05875 PE=4 SV=1
C1GJL2	1.30875	0.0055742	2006	0.000646003	0.000845455	Cysteine-tRNA ligase OS=Paracoccidioides brasiliensis (strain Pb18) OX=502780 GN=PADG_07448 PE=3 SV=2
C1G4I3	1.30896	0.00208682	1841	0.000665767	0.000871459	Obg-like ATPase 1 OS=Paracoccidioides brasiliensis (strain Pb18) OX=502780 GN=PADG_01849 PE=3 SV=1
C1G7N9	1.30922	0.00691145	1190	0.000460943	0.000603475	Uncharacterized protein OS=Paracoccidioides brasiliensis (strain Pb18) OX=502780 GN=PADG_03194 PE=3 SV=1
C1FZL2	1.3108	0.000149589	1048	0.00101719	0.00133333	Succinate dehydrogenase [ubiquinone] flavoprotein subunit, mitochondrial OS=Paracoccidioides brasiliensis (strain Pb18) OX=502780 GN=PADG_00052 PE=3 SV=2
C1G5F2	1.31601	0.00618727	84	0.000358158	0.00047134	Uncharacterized protein OS=Paracoccidioides brasiliensis (strain Pb18) OX=502780 GN=PADG_02407 PE=4 SV=1
C1GG60	1.31639	0.00602823	54	0.000492752	0.000648654	Phosphoribosylamine-glycine ligase OS=Paracoccidioides brasiliensis (strain Pb18) OX=502780 GN=PADG_06297 PE=3 SV=1
C1GJX2	1.31753	0.00619713	402	0.00106018	0.00139682	Uncharacterized protein OS=Paracoccidioides brasiliensis (strain Pb18) OX=502780 GN=PADG_07558 PE=3 SV=2
C1FYE8	1.32499	0.00312732	2345	0.000430029	0.000569783	Uncharacterized protein OS=Paracoccidioides brasiliensis (strain Pb18) OX=502780 GN=PADG_00824 PE=4 SV=2
C1GEM3	1.33407	0.0012695	1926	0.000739519	0.00098657	Histone acetyltransferase type B subunit 2 OS=Paracoccidioides brasiliensis (strain Pb18) OX=502780 GN=PADG_05709 PE=4 SV=2
C1G0B7	1.3347	0.00550886	1936	0.00058578	0.000781842	Uncharacterized protein OS=Paracoccidioides brasiliensis (strain Pb18) OX=502780 GN=PADG_00307 PE=4 SV=1
C1GIE5	1.33622	0.00356182	1851	0.000472018	0.00063072	Uncharacterized protein OS=Paracoccidioides brasiliensis (strain Pb18) OX=502780 GN=PADG_07031 PE=4 SV=1
C1G0I9	1.33713	0.000313517	2898	0.000604905	0.000808834	Uncharacterized protein OS=Paracoccidioides brasiliensis (strain Pb18) OX=502780 GN=PADG_00379 PE=4 SV=1
C1GB84	1.34023	0.00271777	2417	0.000697915	0.000935364	Uncharacterized protein OS=Paracoccidioides brasiliensis (strain Pb18) OX=502780 GN=PADG_04885 PE=4 SV=1
C1GH68	1.3433	0.00244956	2910	0.000542797	0.00072914	Uncharacterized protein OS=Paracoccidioides brasiliensis (strain Pb18) OX=502780 GN=PADG_06604 PE=3 SV=2
C1GDY8	1.35611	0.00574835	2450	0.000484612	0.000657185	Uncharacterized protein OS=Paracoccidioides brasiliensis (strain Pb18) OX=502780 GN=PADG_05474 PE=4 SV=1
C1GLR3	1.35937	0.00328923	1562	0.000799116	0.0010863	Acetolactate synthase, small subunit OS=Paracoccidioides brasiliensis (strain Pb18) OX=502780 GN=PADG_08304 PE=4 SV=1
C1G0A1	1.36068	0.000221358	1853	0.000502975	0.000684386	Uncharacterized protein OS=Paracoccidioides brasiliensis (strain Pb18) OX=502780 GN=PADG_00291 PE=4 SV=1
C1G421	1.36077	0.00111645	2004	0.000647013	0.000880433	Uncharacterized protein OS=Paracoccidioides brasiliensis (strain Pb18) OX=502780 GN=PADG_01687 PE=3 SV=1
C1G6U5	1.36156	1.9707e-05	1990	0.0011763	0.00160161	Tubulin beta chain OS=Paracoccidioides brasiliensis (strain Pb18) OX=502780 GN=PADG_02900 PE=3 SV=2
C1GAK7	1.36237	3.91807e-05	808	0.000482663	0.000657564	Adenine phosphoribosyltransferase OS=Paracoccidioides brasiliensis (strain Pb18) OX=502780 GN=PADG_04293 PE=3 SV=1
C1G597	1.36369	0.00414566	2311	0.000574254	0.000783103	Uncharacterized protein OS=Paracoccidioides brasiliensis (strain Pb18) OX=502780 GN=PADG_03467 PE=4 SV=1
C1GB82	1.37111	0.0021811	2862	0.000655288	0.000898469	Protein transporter SEC24 OS=Paracoccidioides brasiliensis (strain Pb18) OX=502780 GN=PADG_04883 PE=4 SV=1
C1G7A3	1.37787	0.0003446	2396	0.000800177	0.00110254	Succinate-semialdehyde dehydrogenase OS=Paracoccidioides brasiliensis (strain Pb18) OX=502780 GN=PADG_03058 PE=3 SV=1
A0A0A0HWR3	1.37962	0.00534246	1564	0.000720751	0.000994366	Phosphoribosylformylglycinamidine synthase OS=Paracoccidioides brasiliensis (strain Pb18) OX=502780 GN=PADG_11972 PE=3 SV=1
C1G977	1.38118	1.89729e-05	781	0.00106896	0.00147643	Phosphotransferase OS=Paracoccidioides brasiliensis (strain Pb18) OX=502780 GN=PADG_03813 PE=3 SV=2
C1G5V2	1.38668	0.00553782	135	0.000256696	0.000355955	Uncharacterized protein OS=Paracoccidioides brasiliensis (strain Pb18) OX=502780 GN=PADG_02557 PE=4 SV=2
C1GAY3	1.38709	0.00312456	484	0.000359187	0.000498225	Proline dehydrogenase OS=Paracoccidioides brasiliensis (strain Pb18) OX=502780 GN=PADG_04419 PE=3 SV=1
C1G8P1	1.38805	0.00140302	2325	0.000410369	0.000569612	Uncharacterized protein OS=Paracoccidioides brasiliensis (strain Pb18) OX=502780 GN=PADG_03627 PE=4 SV=1
C1GL48	1.38829	0.000533077	1567	0.000820822	0.00113954	Ubiquitin carboxyl-terminal hydrolase OS=Paracoccidioides brasiliensis (strain Pb18) OX=502780 GN=PADG_07834 PE=3 SV=2
C1G9D3	1.38907	0.00196937	1611	0.000306829	0.000426206	Uncharacterized protein OS=Paracoccidioides brasiliensis (strain Pb18) OX=502780 GN=PADG_03869 PE=4 SV=2
C1G7L2	1.39219	0.000688509	39	0.000780322	0.00108636	3-isopropylmalate dehydratase OS=Paracoccidioides brasiliensis (strain Pb18) OX=502780 GN=PADG_03167 PE=3 SV=1
C1G0D2	1.39376	0.000379164	2044	0.000286957	0.000399949	Uncharacterized protein OS=Paracoccidioides brasiliensis (strain Pb18) OX=502780 GN=PADG_00322 PE=4 SV=1
C1G413	1.39432	0.000810965	1572	0.000676311	0.000942991	NADH dehydrogenase [ubiquinone] flavoprotein 1, mitochondrial OS=Paracoccidioides brasiliensis (strain Pb18) OX=502780 GN=PADG_01679 PE=3 SV=1
C1G989	1.39581	1e-05	774	0.00157905	0.00220406	NAD-specific glutamate dehydrogenase OS=Paracoccidioides brasiliensis (strain Pb18) OX=502780 GN=PADG_03825 PE=3 SV=1; Additional IDs concatenated into MaxParsimony group: A0A0A0HRG1
C1G3H9	1.40185	0.00394708	2313	0.000450266	0.000631205	Aldehyde dehydrogenase OS=Paracoccidioides brasiliensis (strain Pb18) OX=502780 GN=PADG_01495 PE=3 SV=2
C1G8B6	1.40583	0.00129431	836	0.00041074	0.000577431	Uncharacterized protein OS=Paracoccidioides brasiliensis (strain Pb18) OX=502780 GN=PADG_03502 PE=4 SV=2
C1GKH0	1.40983	0.000782946	1616	0.000277724	0.000391543	F-actin-capping protein subunit beta OS=Paracoccidioides brasiliensis (strain Pb18) OX=502780 GN=PADG_07756 PE=3 SV=1
C1GIS0	1.41074	0.00168696	433	0.00062417	0.000880539	Histone acetyltransferase type B catalytic subunit OS=Paracoccidioides brasiliensis (strain Pb18) OX=502780 GN=PADG_07156 PE=3 SV=2
C1G548	1.41087	0.000906264	483	0.000308626	0.000435432	Uncharacterized protein OS=Paracoccidioides brasiliensis (strain Pb18) OX=502780 GN=PADG_02064 PE=4 SV=1
C1G3H0	1.41482	0.000371938	2307	0.0003895	0.000551073	Uncharacterized protein OS=Paracoccidioides brasiliensis (strain Pb18) OX=502780 GN=PADG_01486 PE=4 SV=1
C1G351	1.42035	0.00255324	1558	0.000687237	0.000976117	Coatomer subunit beta' OS=Paracoccidioides brasiliensis (strain Pb18) OX=502780 GN=PADG_01367 PE=3 SV=1
C1GFV8	1.42149	0.00052422	487	0.000318951	0.000453386	Saccharopine dehydrogenase [NAD(+), L-lysine-forming] OS=Paracoccidioides brasiliensis (strain Pb18) OX=502780 GN=PADG_06144 PE=3 SV=2
A0A0A0HT88	1.42266	0.00234018	450	0.000513142	0.000730028	Uncharacterized protein OS=Paracoccidioides brasiliensis (strain Pb18) OX=502780 GN=PADG_11240 PE=4 SV=1
C1G1W6	1.42944	0.000220886	2020	0.000552898	0.000790335	Mannose-6-phosphate isomerase OS=Paracoccidioides brasiliensis (strain Pb18) OX=502780 GN=PADG_02132 PE=3 SV=1
C1GGC0	1.43582	0.00171633	1199	0.000470095	0.000674969	Uncharacterized protein OS=Paracoccidioides brasiliensis (strain Pb18) OX=502780 GN=PADG_06357 PE=3 SV=1
C1GG06	1.4388	0.00397222	1197	0.000420982	0.000605708	Uncharacterized protein OS=Paracoccidioides brasiliensis (strain Pb18) OX=502780 GN=PADG_06243 PE=4 SV=1
C1GHU1	1.43983	0.0032877	2016	0.000462023	0.000665236	Uncharacterized protein OS=Paracoccidioides brasiliensis (strain Pb18) OX=502780 GN=PADG_06827 PE=4 SV=1
C1G6U0	1.44179	0.00287613	2921	0.00052412	0.00075567	Uncharacterized protein OS=Paracoccidioides brasiliensis (strain Pb18) OX=502780 GN=PADG_02895 PE=3 SV=1
C1GEZ1	1.44326	0.00111238	1251	0.000338536	0.000488596	Arginine biosynthesis bifunctional protein ArgJ, mitochondrial OS=Paracoccidioides brasiliensis (strain Pb18) OX=502780 GN=PADG_05827 PE=3 SV=1
C1G950	1.44794	0.00222194	2343	0.000306778	0.000444197	Uncharacterized protein OS=Paracoccidioides brasiliensis (strain Pb18) OX=502780 GN=PADG_03786 PE=4 SV=1
A0A0A0HRF1	1.44867	0.00669373	1218	0.000307584	0.000445588	Hydroxyacylglutathione hydrolase OS=Paracoccidioides brasiliensis (strain Pb18) OX=502780 GN=PADG_12204 PE=4 SV=1
C1GL11	1.44939	0.00466351	2904	0.000490931	0.000711548	Glycerol-3-phosphate dehydrogenase [NAD(+)] OS=Paracoccidioides brasiliensis (strain Pb18) OX=502780 GN=PADG_08018 PE=3 SV=1
A0A0A0HVP8	1.45168	5.16071e-05	2002	0.000820937	0.00119174	Mitogen-activated protein kinase OS=Paracoccidioides brasiliensis (strain Pb18) OX=502780 GN=PADG_11275 PE=3 SV=1
C1GEX6	1.45214	0.00020165	439	0.00048987	0.000711359	CTP synthase OS=Paracoccidioides brasiliensis (strain Pb18) OX=502780 GN=PADG_05812 PE=3 SV=2
C1GLJ3	1.4555	4.19905e-05	1561	0.000788885	0.00114822	T-complex protein 1 subunit eta OS=Paracoccidioides brasiliensis (strain Pb18) OX=502780 GN=PADG_08234 PE=3 SV=1
C1GJJ1	1.45588	0.000212948	66	0.00046971	0.000683841	Serine/threonine-protein phosphatase OS=Paracoccidioides brasiliensis (strain Pb18) OX=502780 GN=PADG_07427 PE=3 SV=1; Additional IDs concatenated into MaxParsimony group: C1GE30
C1GF88	1.45594	0.000976239	1166	0.000615819	0.000896593	ATP-dependent RNA helicase DHH1 OS=Paracoccidioides brasiliensis (strain Pb18) OX=502780 GN=PADG_05924 PE=3 SV=2
C1G7L4	1.46685	0.00383763	1263	0.000309016	0.000453279	Uncharacterized protein OS=Paracoccidioides brasiliensis (strain Pb18) OX=502780 GN=PADG_03169 PE=4 SV=2
C1GHE5	1.47083	0.000685259	1167	0.000513441	0.000755184	Uncharacterized protein OS=Paracoccidioides brasiliensis (strain Pb18) OX=502780 GN=PADG_06681 PE=4 SV=2
C1GCV8	1.47245	1e-05	1945	0.000675741	0.000994995	T-complex protein 1 subunit zeta OS=Paracoccidioides brasiliensis (strain Pb18) OX=502780 GN=PADG_05094 PE=3 SV=1
C1FZY1	1.47421	0.000387827	1850	0.00055516	0.000818421	Uncharacterized protein OS=Paracoccidioides brasiliensis (strain Pb18) OX=502780 GN=PADG_00171 PE=3 SV=1
C1GFL8	1.47453	0.000489374	2919	0.000379499	0.000559583	Deoxyribose-phosphate aldolase OS=Paracoccidioides brasiliensis (strain Pb18) OX=502780 GN=PADG_06054 PE=3 SV=1
C1FZP5	1.48735	1e-05	440	0.000472222	0.000702361	Uncharacterized protein OS=Paracoccidioides brasiliensis (strain Pb18) OX=502780 GN=PADG_00085 PE=4 SV=1
C1G0Y9	1.49074	0.00157889	2828	0.000358043	0.000533748	Glutaredoxin OS=Paracoccidioides brasiliensis (strain Pb18) OX=502780 GN=PADG_00529 PE=4 SV=1
C1GDK4	1.49745	7.39611e-05	2471	0.000296567	0.000444095	Uncharacterized protein OS=Paracoccidioides brasiliensis (strain Pb18) OX=502780 GN=PADG_05340 PE=4 SV=1
C1G1F2	1.50619	1e-05	8	0.00183554	0.00276467	Elongation factor 1-alpha OS=Paracoccidioides brasiliensis (strain Pb18) OX=502780 GN=PADG_00692 PE=3 SV=1
C1GJH6	1.51499	2.04585e-05	2321	0.000328613	0.000497847	Uncharacterized protein OS=Paracoccidioides brasiliensis (strain Pb18) OX=502780 GN=PADG_07412 PE=4 SV=1
C1GG11	1.51644	0.00212597	1583	0.000369193	0.000559859	Uncharacterized protein OS=Paracoccidioides brasiliensis (strain Pb18) OX=502780 GN=PADG_06248 PE=3 SV=1
C1G002	1.51702	1.17794e-05	390	0.00101429	0.00153869	ATP-dependent 6-phosphofructokinase OS=Paracoccidioides brasiliensis (strain Pb18) OX=502780 GN=PADG_00192 PE=3 SV=1
A0A0A0HT52	1.52251	0.00247129	1236	0.000297207	0.0004525	Uracil-regulated protein 1 OS=Paracoccidioides brasiliensis (strain Pb18) OX=502780 GN=PADG_12145 PE=4 SV=1
C1GL12	1.52327	0.000283289	1854	0.000555135	0.000845623	Glycogen debranching enzyme OS=Paracoccidioides brasiliensis (strain Pb18) OX=502780 GN=PADG_08019 PE=4 SV=2
C1FZT8	1.52675	0.0013612	2290	0.000921261	0.00140653	Tubulin alpha chain OS=Paracoccidioides brasiliensis (strain Pb18) OX=502780 GN=PADG_00128 PE=3 SV=1; Additional IDs concatenated into MaxParsimony group: C1G3F2
C1G019	1.53019	4.08673e-05	2905	0.000626752	0.000959051	Guanine deaminase OS=Paracoccidioides brasiliensis (strain Pb18) OX=502780 GN=PADG_00209 PE=4 SV=2
C1GHL1	1.53063	0.00343505	2316	0.000390037	0.000597004	DNA-directed RNA polymerase subunit OS=Paracoccidioides brasiliensis (strain Pb18) OX=502780 GN=PADG_06747 PE=3 SV=2
C1G2R8	1.532	0.000162766	1462	0.000574612	0.000880308	Pre-mRNA-splicing factor OS=Paracoccidioides brasiliensis (strain Pb18) OX=502780 GN=PADG_01234 PE=3 SV=1
C1GF61	1.53235	1.81622e-05	789	0.00061557	0.000943269	Serine-tRNA ligase OS=Paracoccidioides brasiliensis (strain Pb18) OX=502780 GN=PADG_05897 PE=4 SV=1
C1G4X7	1.53618	0.00350531	2703	0.000266855	0.000409937	Acetoacetate-CoA ligase OS=Paracoccidioides brasiliensis (strain Pb18) OX=502780 GN=PADG_01993 PE=4 SV=1
C1GB15	1.53716	1.47692e-05	480	0.00031835	0.000489354	26S proteasome regulatory subunit rpn11 OS=Paracoccidioides brasiliensis (strain Pb18) OX=502780 GN=PADG_04451 PE=4 SV=2
C1G252	1.54221	0.000946334	2465	0.000236709	0.000365055	Glutathione synthetase OS=Paracoccidioides brasiliensis (strain Pb18) OX=502780 GN=PADG_02218 PE=3 SV=1
C1G479	1.54314	0.000218191	2007	0.000472452	0.000729057	Mannose-1-phosphate guanyltransferase OS=Paracoccidioides brasiliensis (strain Pb18) OX=502780 GN=PADG_01745 PE=4 SV=2
C1G5J3	1.5451	0.000101632	2867	0.000512476	0.000791828	ATP-dependent (S)-NAD(P)H-hydrate dehydratase OS=Paracoccidioides brasiliensis (strain Pb18) OX=502780 GN=PADG_02448 PE=3 SV=2
A0A0A0HUB3	1.54544	0.00390914	846	0.000379553	0.000586576	Uncharacterized protein OS=Paracoccidioides brasiliensis (strain Pb18) OX=502780 GN=PADG_11735 PE=3 SV=1
C1GIF1	1.5486	4.62678e-05	771	0.000769231	0.00119123	Uncharacterized protein OS=Paracoccidioides brasiliensis (strain Pb18) OX=502780 GN=PADG_07037 PE=4 SV=2
C1G631	1.553	0.000986	60	0.00041822	0.000649494	Uncharacterized protein OS=Paracoccidioides brasiliensis (strain Pb18) OX=502780 GN=PADG_02636 PE=3 SV=2
C1GK72	1.55839	0.000355896	153	0.000245123	0.000381999	Uncharacterized protein OS=Paracoccidioides brasiliensis (strain Pb18) OX=502780 GN=PADG_07658 PE=3 SV=1
C1GHT1	1.55842	0.00143615	2493	0.000245226	0.000382165	Uncharacterized protein OS=Paracoccidioides brasiliensis (strain Pb18) OX=502780 GN=PADG_06817 PE=4 SV=1
C1GMG6	1.56168	1e-05	2870	0.000511869	0.000799373	3'(2'),5'-bisphosphate nucleotidase OS=Paracoccidioides brasiliensis (strain Pb18) OX=502780 GN=PADG_08452 PE=4 SV=1
C1G558	1.56411	7.40646e-05	42	0.000511653	0.000800281	Uncharacterized protein OS=Paracoccidioides brasiliensis (strain Pb18) OX=502780 GN=PADG_03428 PE=4 SV=1
C1GLA2	1.56622	1.14094e-05	1565	0.00048201	0.000754935	Eukaryotic translation initiation factor 5A OS=Paracoccidioides brasiliensis (strain Pb18) OX=502780 GN=PADG_07888 PE=3 SV=2
C1FZ53	1.57229	0.00181534	2852	0.000770937	0.00121214	Uncharacterized protein OS=Paracoccidioides brasiliensis (strain Pb18) OX=502780 GN=PADG_01079 PE=4 SV=2
C1G766	1.573	7.65646e-05	1601	0.000378861	0.00059595	Myosin-1 OS=Paracoccidioides brasiliensis (strain Pb18) OX=502780 GN=PADG_03021 PE=3 SV=2
C1GAN6	1.57318	0.0022821	1184	0.000350357	0.000551176	Uncharacterized protein OS=Paracoccidioides brasiliensis (strain Pb18) OX=502780 GN=PADG_04322 PE=4 SV=1
C1G7W3	1.57708	0.00410199	1618	0.00023662	0.000373169	Uncharacterized protein OS=Paracoccidioides brasiliensis (strain Pb18) OX=502780 GN=PADG_03268 PE=4 SV=2
C1FZP0	1.57711	0.000269158	2444	0.000440337	0.000694458	Eukaryotic translation initiation factor 3 subunit D OS=Paracoccidioides brasiliensis (strain Pb18) OX=502780 GN=PADG_00080 PE=3 SV=1
C1GE89	1.59071	0.00628047	2456	0.000224472	0.000357068	HAL protein kinase OS=Paracoccidioides brasiliensis (strain Pb18) OX=502780 GN=PADG_05575 PE=4 SV=2
C1G6R0	1.593	1.18212e-05	2301	0.000513602	0.000818166	Uncharacterized protein OS=Paracoccidioides brasiliensis (strain Pb18) OX=502780 GN=PADG_02865 PE=4 SV=2
C1G5B2	1.59328	0.00738158	1608	0.000278555	0.000443817	Uncharacterized protein OS=Paracoccidioides brasiliensis (strain Pb18) OX=502780 GN=PADG_03482 PE=4 SV=1
C1G8S4	1.60148	6.0858e-05	51	0.000471806	0.000755587	Uncharacterized protein OS=Paracoccidioides brasiliensis (strain Pb18) OX=502780 GN=PADG_03660 PE=4 SV=1
A0A0A0HX63	1.60202	2.44096e-05	393	0.000799254	0.00128042	Acetolactate synthase OS=Paracoccidioides brasiliensis (strain Pb18) OX=502780 GN=PADG_11114 PE=3 SV=1
C1GM90	1.60585	0.00164809	2303	0.000419373	0.000673451	Uncharacterized protein OS=Paracoccidioides brasiliensis (strain Pb18) OX=502780 GN=PADG_08176 PE=4 SV=1
C1G018	1.60912	4.28568e-05	1448	0.000596285	0.000959493	Choline-sulfatase OS=Paracoccidioides brasiliensis (strain Pb18) OX=502780 GN=PADG_00208 PE=4 SV=2
C1GD55	1.61785	0.00725866	1858	0.000449632	0.000727435	Uncharacterized protein OS=Paracoccidioides brasiliensis (strain Pb18) OX=502780 GN=PADG_05191 PE=4 SV=2
C1GLG4	1.61863	0.000348578	1590	0.000318287	0.000515189	Uncharacterized protein OS=Paracoccidioides brasiliensis (strain Pb18) OX=502780 GN=PADG_08100 PE=4 SV=1
C1GAU7	1.62274	0.000104994	1554	0.000821799	0.00133356	Uncharacterized protein OS=Paracoccidioides brasiliensis (strain Pb18) OX=502780 GN=PADG_04383 PE=4 SV=2
C1GHS9	1.63546	0.000140944	2300	0.000473315	0.000774085	Probable Xaa-Pro aminopeptidase PADG_06815 OS=Paracoccidioides brasiliensis (strain Pb18) OX=502780 GN=PADG_06815 PE=3 SV=2
C1G0A8	1.64018	1e-05	1150	0.000748399	0.00122751	Uncharacterized protein OS=Paracoccidioides brasiliensis (strain Pb18) OX=502780 GN=PADG_00298 PE=4 SV=1
C1GHB2	1.64363	0.00356405	141	0.000195168	0.000320785	Uncharacterized protein OS=Paracoccidioides brasiliensis (strain Pb18) OX=502780 GN=PADG_06648 PE=4 SV=1
C1G561	1.64499	9.72212e-05	764	0.000654987	0.00107744	Uncharacterized protein OS=Paracoccidioides brasiliensis (strain Pb18) OX=502780 GN=PADG_03431 PE=4 SV=2
C1FZT6	1.6455	0.000783193	2707	0.000330248	0.000543423	Uncharacterized protein OS=Paracoccidioides brasiliensis (strain Pb18) OX=502780 GN=PADG_00126 PE=4 SV=1
C1G8Z1	1.64682	0.00198761	104	0.000258932	0.000426416	Uncharacterized protein OS=Paracoccidioides brasiliensis (strain Pb18) OX=502780 GN=PADG_03727 PE=4 SV=1
C1FZ88	1.64937	1e-05	816	0.000420893	0.000694207	Importin subunit alpha OS=Paracoccidioides brasiliensis (strain Pb18) OX=502780 GN=PADG_01114 PE=3 SV=2
C1FZF8	1.65015	0.00748848	120	0.000237036	0.000391144	Uncharacterized protein OS=Paracoccidioides brasiliensis (strain Pb18) OX=502780 GN=PADG_01184 PE=4 SV=1
C1G1A3	1.65231	3.42579e-05	2018	0.000349468	0.000577431	Uncharacterized protein OS=Paracoccidioides brasiliensis (strain Pb18) OX=502780 GN=PADG_00643 PE=4 SV=1
C1G3V6	1.65755	0.000329553	65	0.000418369	0.000693468	Uncharacterized protein OS=Paracoccidioides brasiliensis (strain Pb18) OX=502780 GN=PADG_01622 PE=3 SV=1
C1GMU9	1.6631	0.00344396	509	0.000235353	0.000391415	Nicotinate phosphoribosyltransferase OS=Paracoccidioides brasiliensis (strain Pb18) OX=502780 GN=PADG_08593 PE=4 SV=2
C1G109	1.66605	0.00246748	497	0.000246267	0.000410294	Dolichol-phosphate mannosyltransferase subunit 1 OS=Paracoccidioides brasiliensis (strain Pb18) OX=502780 GN=PADG_00549 PE=3 SV=2
C1G8X9	1.67442	0.000764159	511	0.000265047	0.000443799	Peptidylprolyl isomerase OS=Paracoccidioides brasiliensis (strain Pb18) OX=502780 GN=PADG_03715 PE=4 SV=1
C1G2R7	1.67467	6.61008e-05	2926	0.000275928	0.000462088	Uncharacterized protein OS=Paracoccidioides brasiliensis (strain Pb18) OX=502780 GN=PADG_01233 PE=4 SV=2
C1GIJ9	1.67586	0.000434415	428	0.00050948	0.00085382	Uncharacterized protein OS=Paracoccidioides brasiliensis (strain Pb18) OX=502780 GN=PADG_07085 PE=4 SV=1
C1GF19	1.68197	2.28939e-05	2917	0.000565934	0.000951884	Uncharacterized protein OS=Paracoccidioides brasiliensis (strain Pb18) OX=502780 GN=PADG_05855 PE=4 SV=1
A0A0A0HVL2	1.69602	0.00204787	1210	0.000308249	0.000522796	Uncharacterized protein OS=Paracoccidioides brasiliensis (strain Pb18) OX=502780 GN=PADG_12430 PE=4 SV=1
C1FYZ9	1.69654	0.0020127	2457	0.000235137	0.000398918	Uncharacterized protein OS=Paracoccidioides brasiliensis (strain Pb18) OX=502780 GN=PADG_01025 PE=4 SV=1
C1G168	1.70255	0.00157485	1223	0.000297622	0.000506717	Uncharacterized protein OS=Paracoccidioides brasiliensis (strain Pb18) OX=502780 GN=PADG_00608 PE=4 SV=1
C1GAE3	1.71134	1e-05	1953	0.000685678	0.00117343	Uncharacterized protein OS=Paracoccidioides brasiliensis (strain Pb18) OX=502780 GN=PADG_04229 PE=4 SV=1
C1G412	1.72546	0.00146871	2695	0.000361263	0.000623343	Uncharacterized protein OS=Paracoccidioides brasiliensis (strain Pb18) OX=502780 GN=PADG_01678 PE=4 SV=1
C1G4U9	1.72991	0.00403778	1334	0.00017435	0.000301611	Uncharacterized protein OS=Paracoccidioides brasiliensis (strain Pb18) OX=502780 GN=PADG_01965 PE=3 SV=1
C1G029	1.73107	0.000184807	824	0.000297808	0.000515525	Uncharacterized protein OS=Paracoccidioides brasiliensis (strain Pb18) OX=502780 GN=PADG_00219 PE=3 SV=1
C1G4B4	1.73473	0.00216417	1284	0.000184409	0.0003199	Uncharacterized protein OS=Paracoccidioides brasiliensis (strain Pb18) OX=502780 GN=PADG_01780 PE=4 SV=2
C1G8L6	1.73911	8.55012e-05	1575	0.000368484	0.000640833	Uncharacterized protein OS=Paracoccidioides brasiliensis (strain Pb18) OX=502780 GN=PADG_03602 PE=4 SV=1
C1GFP5	1.74762	0.000104027	2309	0.000472938	0.000826514	Uncharacterized protein OS=Paracoccidioides brasiliensis (strain Pb18) OX=502780 GN=PADG_06081 PE=4 SV=1
C1G2L2	1.75243	0.00673046	2709	0.000177786	0.000311558	Uncharacterized protein OS=Paracoccidioides brasiliensis (strain Pb18) OX=502780 GN=PADG_02378 PE=4 SV=2
C1G136	1.75346	1e-05	456	0.000319443	0.000560132	Uncharacterized protein OS=Paracoccidioides brasiliensis (strain Pb18) OX=502780 GN=PADG_00576 PE=4 SV=1
C1G653	1.75405	0.000250273	823	0.000350172	0.00061422	Uncharacterized protein OS=Paracoccidioides brasiliensis (strain Pb18) OX=502780 GN=PADG_02658 PE=4 SV=2
C1G4I2	1.75411	0.00213287	2792	0.000238505	0.000418365	Protein HIR OS=Paracoccidioides brasiliensis (strain Pb18) OX=502780 GN=PADG_01848 PE=3 SV=2
C1G763	1.77817	0.000149917	2070	0.000214874	0.000382082	Uncharacterized protein OS=Paracoccidioides brasiliensis (strain Pb18) OX=502780 GN=PADG_03018 PE=4 SV=2
C1FYJ9	1.78122	1e-05	2391	0.00167073	0.00297595	Pentafunctional AROM polypeptide OS=Paracoccidioides brasiliensis (strain Pb18) OX=502780 GN=PADG_00875 PE=3 SV=2
C1GM22	1.78641	0.000868353	765	0.00031814	0.000568328	Tubulin alpha chain OS=Paracoccidioides brasiliensis (strain Pb18) OX=502780 GN=PADG_08413 PE=3 SV=2
C1G5U7	1.78808	0.00381309	880	0.000173922	0.000310987	Uncharacterized protein OS=Paracoccidioides brasiliensis (strain Pb18) OX=502780 GN=PADG_02552 PE=4 SV=2
A0A0A0HU55	1.79123	0.00262007	2508	0.000178851	0.000320362	Uncharacterized protein OS=Paracoccidioides brasiliensis (strain Pb18) OX=502780 GN=PADG_11980 PE=4 SV=1
C1GEJ1	1.79419	0.00816928	1261	0.000204062	0.000366127	Uncharacterized protein OS=Paracoccidioides brasiliensis (strain Pb18) OX=502780 GN=PADG_05677 PE=3 SV=2
C1G6P0	1.80407	0.000107124	1607	0.000226447	0.000408525	Uncharacterized protein OS=Paracoccidioides brasiliensis (strain Pb18) OX=502780 GN=PADG_02845 PE=4 SV=1
C1FZL0	1.80439	7.68714e-05	815	0.000409429	0.000738771	T-complex protein 1 subunit delta OS=Paracoccidioides brasiliensis (strain Pb18) OX=502780 GN=PADG_00050 PE=3 SV=2
C1FZH6	1.80485	0.00122176	1227	0.000216133	0.000390088	Uncharacterized protein OS=Paracoccidioides brasiliensis (strain Pb18) OX=502780 GN=PADG_00016 PE=3 SV=2
C1GMI8	1.81387	7.14444e-05	804	0.000484784	0.000879336	Uncharacterized protein OS=Paracoccidioides brasiliensis (strain Pb18) OX=502780 GN=PADG_08474 PE=4 SV=1
C1GDW4	1.81634	1.68574e-05	883	0.000215578	0.000391563	DNA helicase OS=Paracoccidioides brasiliensis (strain Pb18) OX=502780 GN=PADG_05450 PE=3 SV=1
C1G787	1.82282	0.000189069	454	0.000327193	0.000596415	Glycylpeptide N-tetradecanoyltransferase OS=Paracoccidioides brasiliensis (strain Pb18) OX=502780 GN=PADG_03042 PE=3 SV=1
C1GI69	1.82966	3.94175e-05	1959	0.00053442	0.000977806	Tryptophan synthase OS=Paracoccidioides brasiliensis (strain Pb18) OX=502780 GN=PADG_06955 PE=3 SV=1
C1G3Y6	1.83793	1.94571e-05	446	0.00051297	0.000942803	Uncharacterized protein OS=Paracoccidioides brasiliensis (strain Pb18) OX=502780 GN=PADG_01652 PE=4 SV=1
C1GN40	1.8408	0.00090559	2132	0.000266102	0.00048984	Uncharacterized protein OS=Paracoccidioides brasiliensis (strain Pb18) OX=502780 GN=PADG_08684 PE=4 SV=2
C1G9E5	1.85733	0.000459286	2691	0.000286957	0.000532974	Lysine-tRNA ligase OS=Paracoccidioides brasiliensis (strain Pb18) OX=502780 GN=PADG_03881 PE=4 SV=2
C1FZI7	1.86191	1.283e-05	398	0.000830489	0.0015463	Vacuolar protein sorting/targeting protein 10 OS=Paracoccidioides brasiliensis (strain Pb18) OX=502780 GN=VPS10 PE=3 SV=1
C1G5Z1	1.86194	0.000903512	2469	0.000286856	0.000534108	Uncharacterized protein OS=Paracoccidioides brasiliensis (strain Pb18) OX=502780 GN=PADG_02596 PE=4 SV=2
A0A0A0HTP6	1.86879	1e-05	44	0.000513959	0.000960481	Alcohol dehydrogenase 1 OS=Paracoccidioides brasiliensis (strain Pb18) OX=502780 GN=PADG_11405 PE=3 SV=1
C1FYG5	1.874	0.000862842	2099	0.000184952	0.000346599	Histidinol-phosphate transaminase OS=Paracoccidioides brasiliensis (strain Pb18) OX=502780 GN=PADG_00841 PE=3 SV=1
C1GE78	1.88594	0.00149598	2714	0.00019407	0.000366004	Porphobilinogen deaminase OS=Paracoccidioides brasiliensis (strain Pb18) OX=502780 GN=PADG_05564 PE=4 SV=2
C1G7T4	1.88893	1e-05	1222	0.000296567	0.000560195	Lon protease homolog, mitochondrial OS=Paracoccidioides brasiliensis (strain Pb18) OX=502780 GN=PIM1 PE=3 SV=1
C1GMJ8	1.91547	2.1068e-05	2013	0.000593422	0.00113668	T-complex protein 1 subunit epsilon OS=Paracoccidioides brasiliensis (strain Pb18) OX=502780 GN=PADG_08484 PE=3 SV=2
C1G0S6	1.91934	0.000353593	2754	0.000184952	0.000354985	Uncharacterized protein OS=Paracoccidioides brasiliensis (strain Pb18) OX=502780 GN=PADG_00466 PE=4 SV=1
C1G0F9	1.94034	1.23546e-05	2347	0.000370938	0.000719746	Kynureninase OS=Paracoccidioides brasiliensis (strain Pb18) OX=502780 GN=BNA5 PE=3 SV=1
C1G620	1.94467	6.11459e-05	2026	0.000370229	0.000719974	Uncharacterized protein OS=Paracoccidioides brasiliensis (strain Pb18) OX=502780 GN=PADG_02625 PE=4 SV=1
C1G5V7	1.94793	4.28888e-05	2023	0.000388132	0.000756053	Uncharacterized protein OS=Paracoccidioides brasiliensis (strain Pb18) OX=502780 GN=PADG_02562 PE=4 SV=1
C1GKS2	1.95121	5.4076e-05	1857	0.000359239	0.000700951	Ubiquitin carboxyl-terminal hydrolase OS=Paracoccidioides brasiliensis (strain Pb18) OX=502780 GN=PADG_07929 PE=3 SV=2
C1G8F9	1.99792	0.000470335	2740	0.000235968	0.000471445	Uncharacterized protein OS=Paracoccidioides brasiliensis (strain Pb18) OX=502780 GN=PADG_03545 PE=4 SV=2
C1GMS5	2.04554	4.09344e-05	2317	0.000286881	0.000586829	Uncharacterized protein OS=Paracoccidioides brasiliensis (strain Pb18) OX=502780 GN=PADG_08569 PE=4 SV=1
C1G6E5	2.06185	0.000200764	2104	0.000185003	0.00038145	Uncharacterized protein OS=Paracoccidioides brasiliensis (strain Pb18) OX=502780 GN=PADG_02750 PE=4 SV=2
C1FZM6	2.07147	0.00019941	53	0.000317968	0.000658661	tRNA (guanine(37)-N1)-methyltransferase OS=Paracoccidioides brasiliensis (strain Pb18) OX=502780 GN=TRM5 PE=3 SV=2
C1G9M8	2.07587	0.000194751	520	0.000153872	0.000319417	Uncharacterized protein OS=Paracoccidioides brasiliensis (strain Pb18) OX=502780 GN=PADG_03964 PE=4 SV=2
C1GBW5	2.10085	0.000120784	2765	0.000194728	0.000409094	Chorismate synthase OS=Paracoccidioides brasiliensis (strain Pb18) OX=502780 GN=PADG_04487 PE=3 SV=1
C1GJ05	2.10351	1e-05	1559	0.000481743	0.00101335	Dihydroxy-acid dehydratase OS=Paracoccidioides brasiliensis (strain Pb18) OX=502780 GN=PADG_07241 PE=3 SV=1
C1GK18	2.12852	6.50253e-05	2708	0.000225251	0.000479453	Uncharacterized protein OS=Paracoccidioides brasiliensis (strain Pb18) OX=502780 GN=PADG_07604 PE=3 SV=1
C1GLJ8	2.13271	0.00631657	895	0.000162179	0.00034588	Uncharacterized protein OS=Paracoccidioides brasiliensis (strain Pb18) OX=502780 GN=PADG_08239 PE=4 SV=2
C1GKW3	2.13412	1.95555e-05	1613	0.000204171	0.000435727	Dihydroorotase, homodimeric type OS=Paracoccidioides brasiliensis (strain Pb18) OX=502780 GN=PADG_07970 PE=3 SV=1
C1GCH9	2.14075	1e-05	1141	0.000726354	0.00155494	Uncharacterized protein OS=Paracoccidioides brasiliensis (strain Pb18) OX=502780 GN=PADG_04701 PE=3 SV=2
C1GN15	2.20193	3.45428e-05	2295	0.000294707	0.000648923	D-3-phosphoglycerate dehydrogenase OS=Paracoccidioides brasiliensis (strain Pb18) OX=502780 GN=PADG_08648 PE=3 SV=2
C1G0G7	2.204	0.00303313	158	0.000173099	0.000381512	Uncharacterized protein OS=Paracoccidioides brasiliensis (strain Pb18) OX=502780 GN=PADG_00357 PE=3 SV=1
C1G4C0	2.21258	0.000726371	73	0.000216837	0.000479769	Uncharacterized protein OS=Paracoccidioides brasiliensis (strain Pb18) OX=502780 GN=PADG_01786 PE=4 SV=1
C1GMD0	2.21999	1e-05	1239	0.000164364	0.000364886	NADH-ubiquinone oxidoreductase 23 kDa subunit, mitochondrial OS=Paracoccidioides brasiliensis (strain Pb18) OX=502780 GN=PADG_08216 PE=3 SV=1
C1G8T6	2.23335	0.000130265	1580	0.000234369	0.000523428	Uncharacterized protein OS=Paracoccidioides brasiliensis (strain Pb18) OX=502780 GN=PADG_03672 PE=4 SV=1
C1G3Q0	2.23672	2.60544e-05	2055	0.000175118	0.000391689	Methylthioribulose-1-phosphate dehydratase OS=Paracoccidioides brasiliensis (strain Pb18) OX=502780 GN=MDE1 PE=3 SV=1
C1G246	2.24847	0.000202436	2082	0.000257475	0.000578925	Serine/threonine-protein phosphatase OS=Paracoccidioides brasiliensis (strain Pb18) OX=502780 GN=PADG_02212 PE=3 SV=2
C1G032	2.30381	0.000119659	847	0.000166012	0.000382461	Uncharacterized protein OS=Paracoccidioides brasiliensis (strain Pb18) OX=502780 GN=PADG_00222 PE=4 SV=2
C1GB26	2.32585	2.73216e-05	2489	0.000175719	0.000408695	Uncharacterized protein OS=Paracoccidioides brasiliensis (strain Pb18) OX=502780 GN=PADG_04827 PE=4 SV=1
C1G8N6	2.32647	3.63667e-05	2324	0.000329642	0.000766902	Uncharacterized protein OS=Paracoccidioides brasiliensis (strain Pb18) OX=502780 GN=PADG_03622 PE=4 SV=2
C1GC21	2.36158	0.000573815	74	0.00026722	0.000631059	Uncharacterized protein OS=Paracoccidioides brasiliensis (strain Pb18) OX=502780 GN=PADG_04543 PE=3 SV=2
C1GKK5	2.37047	0.000396693	2813	0.000127316	0.0003018	Uncharacterized protein OS=Paracoccidioides brasiliensis (strain Pb18) OX=502780 GN=PADG_07791 PE=4 SV=2
C1G5I8	2.4329	0.000168563	1589	0.000267034	0.000649667	Carbamoyl-phosphate synthase arginine-specific large chain OS=Paracoccidioides brasiliensis (strain Pb18) OX=502780 GN=PADG_02443 PE=4 SV=1
A0A0A0HR72	2.43676	0.000288079	2715	0.000320325	0.000780556	Sorting nexin-41 OS=Paracoccidioides brasiliensis (strain Pb18) OX=502780 GN=PADG_12261 PE=3 SV=1
C1G3W6	2.43821	1e-05	2763	0.000123789	0.000301822	Uncharacterized protein OS=Paracoccidioides brasiliensis (strain Pb18) OX=502780 GN=PADG_01632 PE=4 SV=2
A0A0A0HVY3	2.44344	0.00070333	1630	0.000130647	0.000319228	Uncharacterized protein OS=Paracoccidioides brasiliensis (strain Pb18) OX=502780 GN=PADG_11387 PE=3 SV=1
C1GBH3	2.47525	4.87345e-05	1215	0.000233666	0.000578379	Serine/threonine-protein phosphatase OS=Paracoccidioides brasiliensis (strain Pb18) OX=502780 GN=PADG_04974 PE=3 SV=2
C1G992	2.51986	1e-05	1189	0.000295915	0.000745665	Uncharacterized protein OS=Paracoccidioides brasiliensis (strain Pb18) OX=502780 GN=PADG_03828 PE=4 SV=2
C1GF83	2.56818	0.00019485	833	0.000173118	0.000444598	Uncharacterized protein OS=Paracoccidioides brasiliensis (strain Pb18) OX=502780 GN=PADG_05919 PE=4 SV=1
C1G137	2.67232	0.00255473	1656	0.000143546	0.000383601	Uncharacterized protein OS=Paracoccidioides brasiliensis (strain Pb18) OX=502780 GN=PADG_00577 PE=4 SV=1
C1G650	2.67835	0.00218412	2499	0.000183202	0.00049068	Ribosome-releasing factor 2, mitochondrial OS=Paracoccidioides brasiliensis (strain Pb18) OX=502780 GN=MEF2 PE=3 SV=1
A0A0A0HZD4	2.6819	0.00554184	2102	0.000129016	0.000346009	Uncharacterized protein OS=Paracoccidioides brasiliensis (strain Pb18) OX=502780 GN=PADG_11157 PE=3 SV=1
C1G022	2.73086	1e-05	1449	0.000367832	0.0010045	Uncharacterized protein OS=Paracoccidioides brasiliensis (strain Pb18) OX=502780 GN=PADG_00212 PE=4 SV=1
C1GBS0	2.76475	1e-05	48	0.00033463	0.000925166	Protein pyrABCN OS=Paracoccidioides brasiliensis (strain Pb18) OX=502780 GN=PADG_05071 PE=3 SV=1
C1FYN0	2.78119	2.16534e-05	1204	0.000194665	0.000541399	Allantoicase OS=Paracoccidioides brasiliensis (strain Pb18) OX=502780 GN=PADG_00906 PE=3 SV=1
C1G1T5	2.85882	1e-05	2897	0.000749135	0.00214164	Uncharacterized protein OS=Paracoccidioides brasiliensis (strain Pb18) OX=502780 GN=PADG_02101 PE=4 SV=2
C1GL59	2.86134	1e-05	2935	0.000214485	0.000613715	Imidazole glycerol phosphate synthase hisHF OS=Paracoccidioides brasiliensis (strain Pb18) OX=502780 GN=PADG_07845 PE=3 SV=1
C1GDK8	2.95666	3.01053e-05	86	0.000144101	0.000426058	Uncharacterized protein OS=Paracoccidioides brasiliensis (strain Pb18) OX=502780 GN=PADG_05344 PE=4 SV=2
C1G7B9	3.00968	0.000645395	2814	0.000123898	0.000372893	Transcription elongation factor SPT5 OS=Paracoccidioides brasiliensis (strain Pb18) OX=502780 GN=PADG_03074 PE=3 SV=1
C1G8Q3	3.12886	1e-05	2353	0.000227361	0.000711379	Uncharacterized protein OS=Paracoccidioides brasiliensis (strain Pb18) OX=502780 GN=PADG_03639 PE=4 SV=1
C1G5D2	3.24204	3.05667e-05	2496	0.000153495	0.000497637	Uncharacterized protein OS=Paracoccidioides brasiliensis (strain Pb18) OX=502780 GN=PADG_02387 PE=4 SV=1
C1FZE4	3.25161	1e-05	530	9.29843e-05	0.000302348	Uncharacterized protein OS=Paracoccidioides brasiliensis (strain Pb18) OX=502780 GN=PADG_01170 PE=4 SV=2
C1GJ51	3.25984	1e-05	494	0.000122645	0.000399803	Uncharacterized protein OS=Paracoccidioides brasiliensis (strain Pb18) OX=502780 GN=PADG_07287 PE=4 SV=2
C1G392	3.28912	1e-05	1458	0.000286681	0.00094293	Uncharacterized protein OS=Paracoccidioides brasiliensis (strain Pb18) OX=502780 GN=PADG_01408 PE=4 SV=1
C1G749	3.28964	0.00101334	525	9.23955e-05	0.000303949	Uncharacterized protein OS=Paracoccidioides brasiliensis (strain Pb18) OX=502780 GN=PADG_03004 PE=4 SV=2
C1GEM5	3.32672	0.000696056	2531	0.000112268	0.000373483	5'-3' exoribonuclease 1 OS=Paracoccidioides brasiliensis (strain Pb18) OX=502780 GN=PADG_05711 PE=3 SV=1
C1G2H4	3.37857	5.07107e-05	914	9.19039e-05	0.000310504	Methionine-tRNA ligase OS=Paracoccidioides brasiliensis (strain Pb18) OX=502780 GN=PADG_02340 PE=3 SV=2
C1G3B1	3.42821	1e-05	1160	0.000186524	0.000639443	40S ribosomal protein S12 OS=Paracoccidioides brasiliensis (strain Pb18) OX=502780 GN=PADG_01427 PE=3 SV=2
C1FZC4	3.56002	6.73078e-05	2746	9.97436e-05	0.00035509	Uncharacterized protein OS=Paracoccidioides brasiliensis (strain Pb18) OX=502780 GN=PADG_01150 PE=4 SV=1
C1GD39	3.76972	0.000121194	2119	0.000141923	0.000535012	Uncharacterized protein OS=Paracoccidioides brasiliensis (strain Pb18) OX=502780 GN=PADG_05175 PE=4 SV=2
C1G306	3.82916	4.3129e-05	862	0.000114144	0.000437075	Uncharacterized protein OS=Paracoccidioides brasiliensis (strain Pb18) OX=502780 GN=PADG_01322 PE=4 SV=2
C1G4J9	4.46861	1.59345e-05	864	9.18403e-05	0.000410399	Eukaryotic translation initiation factor 3 subunit H OS=Paracoccidioides brasiliensis (strain Pb18) OX=502780 GN=PADG_01865 PE=3 SV=2
C1GA40	5.871	1e-05	795	0.000154363	0.000906267	Uncharacterized protein OS=Paracoccidioides brasiliensis (strain Pb18) OX=502780 GN=PADG_04126 PE=4 SV=2
C1G461	6.58707	1e-05	504	5.13289e-05	0.000338107	Uncharacterized protein OS=Paracoccidioides brasiliensis (strain Pb18) OX=502780 GN=PADG_01727 PE=4 SV=2
C1G7F3	7.73712	1e-05	2146	0.000133399	0.00103212	Uncharacterized protein OS=Paracoccidioides brasiliensis (strain Pb18) OX=502780 GN=PADG_03108 PE=4 SV=2

## Sheet: Green
Protein id	Fold Change	pValue	GPI (Index in the sparse matrix)	Signal(Bottom)	Signal(Top)	Description
A0A0A0HS74	-2.74994	0.0111188	2112	0.000153118	5.56805e-05	Uncharacterized protein OS=Paracoccidioides brasiliensis (strain Pb18) OX=502780 GN=PADG_12370 PE=4 SV=1
C1G8E3	-2.53499	0.00962137	1007	0.000134339	5.29938e-05	Uncharacterized protein OS=Paracoccidioides brasiliensis (strain Pb18) OX=502780 GN=PADG_03529 PE=4 SV=1
C1GHM7	-2.31168	0.0168902	1370	0.000143399	6.20325e-05	Septum formation protein Maf OS=Paracoccidioides brasiliensis (strain Pb18) OX=502780 GN=PADG_06763 PE=3 SV=1
C1G0T2	-2.30388	0.0233419	2100	0.000164422	7.13673e-05	Uncharacterized protein OS=Paracoccidioides brasiliensis (strain Pb18) OX=502780 GN=PADG_00472 PE=4 SV=1
C1GDL1	-2.29859	0.027549	1479	0.000167666	7.29432e-05	Phospholipid-transporting ATPase OS=Paracoccidioides brasiliensis (strain Pb18) OX=502780 GN=PADG_05347 PE=3 SV=1
C1G1B6	-2.184	0.0287178	961	0.000272156	0.000124614	Non-histone chromosomal protein 6 OS=Paracoccidioides brasiliensis (strain Pb18) OX=502780 GN=PADG_00656 PE=4 SV=2
C1GM11	-2.17585	0.0310152	627	0.000154185	7.08618e-05	Uncharacterized protein OS=Paracoccidioides brasiliensis (strain Pb18) OX=502780 GN=PADG_08402 PE=1 SV=1
C1G7C4	-2.0931	0.021273	350	0.000153116	7.31526e-05	Patatin-like phospholipase domain-containing protein OS=Paracoccidioides brasiliensis (strain Pb18) OX=502780 GN=PADG_03079 PE=3 SV=1
C1GBH7	-2.04526	0.0331516	581	9.19553e-05	4.49602e-05	Uncharacterized protein OS=Paracoccidioides brasiliensis (strain Pb18) OX=502780 GN=PADG_04978 PE=4 SV=1
C1G5L4	-2.02689	0.0398832	2542	0.000151118	7.45565e-05	Uncharacterized protein OS=Paracoccidioides brasiliensis (strain Pb18) OX=502780 GN=PADG_02469 PE=4 SV=2
C1GEQ0	-2.00347	0.0358707	1769	0.00012428	6.20325e-05	Uncharacterized protein OS=Paracoccidioides brasiliensis (strain Pb18) OX=502780 GN=PADG_05736 PE=4 SV=1
C1FZ02	-1.99679	0.0400946	2482	0.000295987	0.000148231	Uncharacterized protein OS=Paracoccidioides brasiliensis (strain Pb18) OX=502780 GN=PADG_01028 PE=4 SV=1
C1G1V1	-1.99093	0.0207264	1491	8.94253e-05	4.49163e-05	Uncharacterized protein OS=Paracoccidioides brasiliensis (strain Pb18) OX=502780 GN=PADG_02117 PE=4 SV=1
C1G3X4	-1.97651	0.0328333	1793	0.000123234	6.23489e-05	Uncharacterized protein OS=Paracoccidioides brasiliensis (strain Pb18) OX=502780 GN=PADG_01640 PE=4 SV=2
C1G6J0	-1.97034	0.0115974	2553	0.000177076	8.98705e-05	Uncharacterized protein OS=Paracoccidioides brasiliensis (strain Pb18) OX=502780 GN=PADG_02795 PE=4 SV=2
C1GKG4	-1.96834	0.0252674	2997	0.000174262	8.85324e-05	Nuclear protein localization protein 4 OS=Paracoccidioides brasiliensis (strain Pb18) OX=502780 GN=PADG_07750 PE=4 SV=1
C1FYF8	-1.92397	0.00865459	2729	0.000256906	0.000133529	Uncharacterized protein OS=Paracoccidioides brasiliensis (strain Pb18) OX=502780 GN=PADG_00834 PE=3 SV=2
contaminant_GR78_MAIZE	-1.92269	0.0266191	1444	0.000153182	7.96706e-05	IMMUNOGLOBULIN BINDING PROTEIN HOMOLOG B70 (HEAT SHOCK PROTEIN...
C1GES7	-1.90132	0.065204	2134	0.000227554	0.000119682	Uncharacterized protein OS=Paracoccidioides brasiliensis (strain Pb18) OX=502780 GN=PADG_05763 PE=4 SV=2
C1GMV9	-1.87332	0.0635944	1855	0.00018426	9.83602e-05	Uncharacterized protein OS=Paracoccidioides brasiliensis (strain Pb18) OX=502780 GN=PADG_08603 PE=3 SV=2
C1G0T1	-1.85661	0.0178414	680	0.00020499	0.000110411	Uncharacterized protein OS=Paracoccidioides brasiliensis (strain Pb18) OX=502780 GN=PADG_00471 PE=4 SV=2
C1GK92	-1.84985	0.0119485	1035	0.000214222	0.000115805	U2 snRNP auxiliary factor large subunit OS=Paracoccidioides brasiliensis (strain Pb18) OX=502780 GN=PADG_07678 PE=3 SV=1
C1GB69	-1.84517	0.0190081	2940	0.000243972	0.000132222	Uncharacterized protein OS=Paracoccidioides brasiliensis (strain Pb18) OX=502780 GN=PADG_04870 PE=4 SV=2
A0A0A0HVP9	-1.76893	0.029162	618	0.000141749	8.01327e-05	40S ribosomal protein S30 OS=Paracoccidioides brasiliensis (strain Pb18) OX=502780 GN=PADG_12373 PE=3 SV=1
C1G1S3	-1.74681	0.0175571	2818	0.000115574	6.61629e-05	Uncharacterized protein OS=Paracoccidioides brasiliensis (strain Pb18) OX=502780 GN=PADG_02089 PE=4 SV=2
contaminant_KERATIN13	-1.74512	0.21172	1060	0.000341902	0.000195919
C1GF55	-1.7277	0.0106218	614	0.000123737	7.16199e-05	Inosine triphosphate pyrophosphatase OS=Paracoccidioides brasiliensis (strain Pb18) OX=502780 GN=PADG_05891 PE=3 SV=1
C1G4U7	-1.7093	0.0314956	1008	0.000213002	0.000124614	Glycine cleavage system H protein OS=Paracoccidioides brasiliensis (strain Pb18) OX=502780 GN=PADG_01963 PE=3 SV=1
C1GIB3	-1.70628	0.12079	2512	0.000102882	6.02961e-05	Uncharacterized protein OS=Paracoccidioides brasiliensis (strain Pb18) OX=502780 GN=PADG_06999 PE=4 SV=1
C1G6Y9	-1.70617	0.0218541	1422	0.00020366	0.000119367	Uncharacterized protein OS=Paracoccidioides brasiliensis (strain Pb18) OX=502780 GN=PADG_02944 PE=4 SV=2
C1GF79	-1.70508	0.0126011	2214	0.000101438	5.94914e-05	Uncharacterized protein OS=Paracoccidioides brasiliensis (strain Pb18) OX=502780 GN=PADG_05915 PE=4 SV=1
C1FYU5	-1.70486	0.07178	1399	7.65181e-05	4.48824e-05	Uncharacterized protein OS=Paracoccidioides brasiliensis (strain Pb18) OX=502780 GN=PADG_00971 PE=3 SV=1
C1G1M0	-1.70265	0.0623824	2038	0.000197214	0.000115828	Uncharacterized protein OS=Paracoccidioides brasiliensis (strain Pb18) OX=502780 GN=PADG_00760 PE=4 SV=1
C1GB98	-1.68427	0.0112127	1329	0.000255239	0.000151543	Uncharacterized protein OS=Paracoccidioides brasiliensis (strain Pb18) OX=502780 GN=PADG_04899 PE=4 SV=2
C1GBH1	-1.68148	0.0621533	1725	0.000120321	7.15564e-05	Uncharacterized protein OS=Paracoccidioides brasiliensis (strain Pb18) OX=502780 GN=PADG_04972 PE=4 SV=2
C1G5A5	-1.67925	0.054884	1933	0.000163366	9.72856e-05	ADP-ribosylation factor 6 OS=Paracoccidioides brasiliensis (strain Pb18) OX=502780 GN=PADG_03475 PE=3 SV=1
C1GEF9	-1.67618	0.015191	1795	0.000179383	0.000107019	Uncharacterized protein OS=Paracoccidioides brasiliensis (strain Pb18) OX=502780 GN=PADG_05645 PE=3 SV=2
C1GMB2	-1.64845	0.0221214	999	0.000236056	0.000143199	Neutral ceramidase OS=Paracoccidioides brasiliensis (strain Pb18) OX=502780 GN=PADG_08198 PE=3 SV=1
C1GLZ7	-1.63874	0.0161122	2470	0.000277347	0.000169244	Uncharacterized protein OS=Paracoccidioides brasiliensis (strain Pb18) OX=502780 GN=PADG_08388 PE=4 SV=2
A0A0A0HXK0	-1.6081	0.109068	563	0.000172536	0.000107292	Uncharacterized protein OS=Paracoccidioides brasiliensis (strain Pb18) OX=502780 GN=PADG_11660 PE=4 SV=1
A0A0A0HSC0	-1.60213	0.0254602	1282	7.12645e-05	4.4481e-05	Uncharacterized protein OS=Paracoccidioides brasiliensis (strain Pb18) OX=502780 GN=PADG_12327 PE=4 SV=1
C1G629	-1.60071	0.0247901	2567	7.12009e-05	4.4481e-05	Uncharacterized protein OS=Paracoccidioides brasiliensis (strain Pb18) OX=502780 GN=PADG_02634 PE=4 SV=1
C1G2F3	-1.59815	0.143074	2117	7.18533e-05	4.49602e-05	Uncharacterized protein OS=Paracoccidioides brasiliensis (strain Pb18) OX=502780 GN=PADG_02319 PE=4 SV=2
C1GH57	-1.59541	0.0461119	1344	0.000183986	0.000115322	Vacuolar protein sorting-associated protein 28 OS=Paracoccidioides brasiliensis (strain Pb18) OX=502780 GN=PADG_06593 PE=3 SV=2
C1G504	-1.58835	0.159299	1014	0.000113457	7.14308e-05	Uncharacterized protein OS=Paracoccidioides brasiliensis (strain Pb18) OX=502780 GN=PADG_02020 PE=3 SV=1
C1GJR4	-1.57912	0.104047	669	0.000126939	8.03856e-05	Uncharacterized protein OS=Paracoccidioides brasiliensis (strain Pb18) OX=502780 GN=PADG_07500 PE=4 SV=1
C1G887	-1.56993	0.0268639	2049	0.000277181	0.000176556	Uncharacterized protein OS=Paracoccidioides brasiliensis (strain Pb18) OX=502780 GN=PADG_03392 PE=4 SV=2
C1GKG2	-1.56568	0.0793889	313	0.000141636	9.0463e-05	Uncharacterized protein OS=Paracoccidioides brasiliensis (strain Pb18) OX=502780 GN=PADG_07748 PE=3 SV=1
C1GGY6	-1.56312	0.0943089	1000	0.000181348	0.000116017	Uncharacterized protein OS=Paracoccidioides brasiliensis (strain Pb18) OX=502780 GN=PADG_06205 PE=4 SV=2
C1G5F3	-1.56185	0.05641	1406	0.000139975	8.96211e-05	Uncharacterized protein OS=Paracoccidioides brasiliensis (strain Pb18) OX=502780 GN=PADG_02408 PE=3 SV=2
C1GI28	-1.56098	0.0472563	2097	8.27221e-05	5.29938e-05	Uncharacterized protein OS=Paracoccidioides brasiliensis (strain Pb18) OX=502780 GN=PADG_06914 PE=4 SV=2
C1GAB8	-1.55758	0.0820475	2138	0.000138892	8.91714e-05	Gamma-glutamylcyclotransferase OS=Paracoccidioides brasiliensis (strain Pb18) OX=502780 GN=PADG_04204 PE=3 SV=2
C1GE99	-1.55524	0.0555538	2213	0.000164233	0.000105599	Pre-mRNA-splicing factor syf1 OS=Paracoccidioides brasiliensis (strain Pb18) OX=502780 GN=PADG_05585 PE=4 SV=1
C1G4I0	-1.55112	0.0132749	2455	0.000317258	0.000204535	Uncharacterized protein OS=Paracoccidioides brasiliensis (strain Pb18) OX=502780 GN=PADG_01846 PE=4 SV=2
C1G4K3	-1.54432	0.012338	2522	0.000123361	7.98801e-05	Uncharacterized protein OS=Paracoccidioides brasiliensis (strain Pb18) OX=502780 GN=PADG_01869 PE=4 SV=1
C1GBE6	-1.53193	0.0268082	2936	0.000176181	0.000115006	CDP-diacylglycerol--serine O-phosphatidyltransferase OS=Paracoccidioides brasiliensis (strain Pb18) OX=502780 GN=PADG_04947 PE=3 SV=2
C1GB03	-1.5307	0.0344368	1372	0.000122593	8.00896e-05	Uncharacterized protein OS=Paracoccidioides brasiliensis (strain Pb18) OX=502780 GN=PADG_04439 PE=4 SV=2
C1GL55	-1.52841	0.0180798	2514	0.000153495	0.000100428	Uncharacterized protein OS=Paracoccidioides brasiliensis (strain Pb18) OX=502780 GN=PADG_07841 PE=4 SV=1
C1GGB4	-1.52839	0.116301	2517	0.000102166	6.68457e-05	Uncharacterized protein OS=Paracoccidioides brasiliensis (strain Pb18) OX=502780 GN=PADG_06351 PE=4 SV=1
C1GF93	-1.52603	0.0495214	673	8.16417e-05	5.34993e-05	Protein-L-isoaspartate O-methyltransferase OS=Paracoccidioides brasiliensis (strain Pb18) OX=502780 GN=PADG_05929 PE=3 SV=1
A0A0A0HQN9	-1.52338	0.0153689	1250	0.000488648	0.000320765	40S ribosomal protein S19 OS=Paracoccidioides brasiliensis (strain Pb18) OX=502780 GN=PADG_12324 PE=4 SV=1
A0A0A0HVN6	-1.52199	0.00929967	196	0.000433168	0.000284606	Uncharacterized protein OS=Paracoccidioides brasiliensis (strain Pb18) OX=502780 GN=PADG_12412 PE=4 SV=1
C1GF18	-1.52109	0.0199565	925	0.000216121	0.000142083	Uncharacterized protein OS=Paracoccidioides brasiliensis (strain Pb18) OX=502780 GN=PADG_05854 PE=4 SV=1
C1GEQ8	-1.51487	0.0224721	661	0.000134	8.84564e-05	Uncharacterized protein OS=Paracoccidioides brasiliensis (strain Pb18) OX=502780 GN=PADG_05744 PE=4 SV=1
C1G3P7	-1.51003	0.0358871	2505	0.000214612	0.000142124	Uncharacterized protein OS=Paracoccidioides brasiliensis (strain Pb18) OX=502780 GN=PADG_01563 PE=4 SV=1
C1FYJ6	-1.50871	0.113199	2294	8.08108e-05	5.35628e-05	Histone H4 OS=Paracoccidioides brasiliensis (strain Pb18) OX=502780 GN=PADG_00872 PE=3 SV=2
C1GCR5	-1.50606	0.106792	2507	9.34245e-05	6.20325e-05	Uncharacterized protein OS=Paracoccidioides brasiliensis (strain Pb18) OX=502780 GN=PADG_04787 PE=4 SV=1
C1FZM4	-1.505	0.109354	666	0.000132594	8.81023e-05	Uncharacterized protein OS=Paracoccidioides brasiliensis (strain Pb18) OX=502780 GN=PADG_00064 PE=4 SV=2
C1GCC3	-1.5033	0.0330018	2468	0.000173744	0.000115575	AGC/NDR/NDR-UNCLASSIFIED protein kinase OS=Paracoccidioides brasiliensis (strain Pb18) OX=502780 GN=PADG_04645 PE=4 SV=2
C1GK60	-1.503	0.0495576	1019	0.000132919	8.8436e-05	Uncharacterized protein OS=Paracoccidioides brasiliensis (strain Pb18) OX=502780 GN=PADG_07646 PE=4 SV=1
A0A0A0HVH2	-1.49747	0.0215067	2908	0.000399748	0.00026695	Uncharacterized protein OS=Paracoccidioides brasiliensis (strain Pb18) OX=502780 GN=PADG_11832 PE=4 SV=1
C1G3R3	-1.49648	0.0122122	894	0.000451641	0.000301802	Uncharacterized protein OS=Paracoccidioides brasiliensis (strain Pb18) OX=502780 GN=PADG_01579 PE=4 SV=2
C1GIL6	-1.49261	0.0271707	1254	0.000489251	0.000327783	Structural maintenance of chromosomes protein OS=Paracoccidioides brasiliensis (strain Pb18) OX=502780 GN=PADG_07102 PE=3 SV=1
C1G6E2	-1.48635	0.0473461	2116	9.30479e-05	6.26015e-05	Dephospho-CoA kinase OS=Paracoccidioides brasiliensis (strain Pb18) OX=502780 GN=PADG_02747 PE=3 SV=1
C1GH26	-1.48575	0.0545274	2484	0.00022559	0.000151836	Uncharacterized protein OS=Paracoccidioides brasiliensis (strain Pb18) OX=502780 GN=PADG_06562 PE=4 SV=1
C1GB13	-1.48313	0.00956464	876	0.000316919	0.000213683	60S ribosomal protein L23 OS=Paracoccidioides brasiliensis (strain Pb18) OX=502780 GN=PADG_04449 PE=3 SV=2
C1GCX2	-1.46945	0.0589829	591	0.000183207	0.000124677	Uncharacterized protein OS=Paracoccidioides brasiliensis (strain Pb18) OX=502780 GN=PADG_05108 PE=4 SV=1
C1GBM7	-1.46077	0.0529501	1753	6.49765e-05	4.4481e-05	Uncharacterized protein OS=Paracoccidioides brasiliensis (strain Pb18) OX=502780 GN=PADG_05028 PE=4 SV=1
C1G598	-1.45659	0.0265221	1866	0.00011452	7.8622e-05	Uncharacterized protein OS=Paracoccidioides brasiliensis (strain Pb18) OX=502780 GN=PADG_03468 PE=4 SV=1
C1G6Q3	-1.45556	0.0416569	2463	0.000154639	0.000106241	Uncharacterized protein OS=Paracoccidioides brasiliensis (strain Pb18) OX=502780 GN=PADG_02858 PE=4 SV=1
C1G8R8	-1.45333	0.045061	2913	0.00035042	0.000241115	Uncharacterized protein OS=Paracoccidioides brasiliensis (strain Pb18) OX=502780 GN=PADG_03654 PE=4 SV=1
C1GEB9	-1.45212	0.0444817	259	0.000194171	0.000133716	Uncharacterized protein OS=Paracoccidioides brasiliensis (strain Pb18) OX=502780 GN=PADG_05605 PE=4 SV=1
C1G590	-1.44997	0.0111124	2761	0.000167581	0.000115575	Uncharacterized protein OS=Paracoccidioides brasiliensis (strain Pb18) OX=502780 GN=PADG_03460 PE=4 SV=1
C1GC90	-1.44902	0.0478741	978	0.000206396	0.000142439	Uncharacterized protein OS=Paracoccidioides brasiliensis (strain Pb18) OX=502780 GN=PADG_04612 PE=4 SV=1
C1GLA9	-1.44655	0.040504	1242	0.000463666	0.000320531	Translation initiation factor aIF-2 OS=Paracoccidioides brasiliensis (strain Pb18) OX=502780 GN=PADG_07895 PE=4 SV=1
C1G6A4	-1.44418	0.288676	2121	0.00010264	7.10712e-05	Uncharacterized protein OS=Paracoccidioides brasiliensis (strain Pb18) OX=502780 GN=PADG_02709 PE=4 SV=1
C1GGU1	-1.4396	0.105507	315	0.000216434	0.000150343	Uncharacterized protein OS=Paracoccidioides brasiliensis (strain Pb18) OX=502780 GN=PADG_06528 PE=4 SV=1
C1G6F4	-1.43236	0.0482553	1757	0.000204447	0.000142734	Uncharacterized protein OS=Paracoccidioides brasiliensis (strain Pb18) OX=502780 GN=PADG_02759 PE=4 SV=1
C1G2F1	-1.43213	0.0446256	2781	0.000102298	7.14308e-05	Uncharacterized protein OS=Paracoccidioides brasiliensis (strain Pb18) OX=502780 GN=PADG_02317 PE=4 SV=2
C1GAM3	-1.42817	0.0934268	2122	0.000101564	7.11143e-05	Uncharacterized protein OS=Paracoccidioides brasiliensis (strain Pb18) OX=502780 GN=PADG_04309 PE=4 SV=1
C1GDR6	-1.4278	0.0427765	216	0.000163936	0.000114817	Uncharacterized protein OS=Paracoccidioides brasiliensis (strain Pb18) OX=502780 GN=PADG_05402 PE=4 SV=2
C1GA76	-1.42727	0.063985	874	0.000560817	0.000392931	Structural maintenance of chromosomes protein OS=Paracoccidioides brasiliensis (strain Pb18) OX=502780 GN=PADG_04162 PE=3 SV=2
C1FZ18	-1.42376	0.120024	1349	0.000278819	0.000195832	Uncharacterized protein OS=Paracoccidioides brasiliensis (strain Pb18) OX=502780 GN=PADG_01044 PE=4 SV=2
C1G8C3	-1.42126	0.0426918	278	0.000101043	7.1094e-05	Uncharacterized protein OS=Paracoccidioides brasiliensis (strain Pb18) OX=502780 GN=PADG_03509 PE=4 SV=2
A0A0A0HST0	-1.42121	0.0116937	1651	0.00043042	0.000302854	Uncharacterized protein OS=Paracoccidioides brasiliensis (strain Pb18) OX=502780 GN=PADG_12152 PE=4 SV=1
C1GA20	-1.41866	0.0171651	165	0.000390279	0.000275105	60S ribosomal protein L11 OS=Paracoccidioides brasiliensis (strain Pb18) OX=502780 GN=PADG_04106 PE=3 SV=1
C1GDF4	-1.41677	0.0758485	1232	0.000329039	0.000232245	Uncharacterized protein OS=Paracoccidioides brasiliensis (strain Pb18) OX=502780 GN=PADG_05290 PE=3 SV=1
C1G0B6	-1.41513	0.170102	302	8.49826e-05	6.00527e-05	Uncharacterized protein OS=Paracoccidioides brasiliensis (strain Pb18) OX=502780 GN=PADG_00306 PE=4 SV=2
C1GFU2	-1.41454	0.0343076	545	0.000327028	0.000231191	Uncharacterized protein OS=Paracoccidioides brasiliensis (strain Pb18) OX=502780 GN=PADG_06128 PE=4 SV=1
C1G7W8	-1.41175	0.119077	2547	0.000113099	8.01123e-05	Uncharacterized protein OS=Paracoccidioides brasiliensis (strain Pb18) OX=502780 GN=PADG_03273 PE=4 SV=1
C1GFR7	-1.40743	0.00953558	2318	0.000525238	0.00037319	Uncharacterized protein OS=Paracoccidioides brasiliensis (strain Pb18) OX=502780 GN=PADG_06103 PE=4 SV=2
C1FZ16	-1.40704	0.0240343	1697	0.000350824	0.000249334	60S ribosomal export protein NMD3 OS=Paracoccidioides brasiliensis (strain Pb18) OX=502780 GN=PADG_01042 PE=3 SV=1
C1G907	-1.40661	0.141316	2203	0.000100831	7.16834e-05	Uncharacterized protein OS=Paracoccidioides brasiliensis (strain Pb18) OX=502780 GN=PADG_03743 PE=3 SV=1
C1GE61	-1.40541	0.0729017	2757	0.000113035	8.04287e-05	Uncharacterized protein OS=Paracoccidioides brasiliensis (strain Pb18) OX=502780 GN=PADG_05547 PE=4 SV=1
C1G0S5	-1.40405	0.0738514	1266	0.000112216	7.99232e-05	Uncharacterized protein OS=Paracoccidioides brasiliensis (strain Pb18) OX=502780 GN=PADG_00465 PE=4 SV=2
C1G3Z2	-1.40053	0.129661	2609	8.76465e-05	6.25811e-05	Uncharacterized protein OS=Paracoccidioides brasiliensis (strain Pb18) OX=502780 GN=PADG_01658 PE=4 SV=1
C1GLF0	-1.39727	0.0722183	1439	0.000175003	0.000125246	Uncharacterized protein OS=Paracoccidioides brasiliensis (strain Pb18) OX=502780 GN=PADG_08086 PE=4 SV=2
C1GN28	-1.39299	0.0235456	2331	0.000371476	0.000266676	Uncharacterized protein OS=Paracoccidioides brasiliensis (strain Pb18) OX=502780 GN=PADG_08672 PE=4 SV=2
C1GB05	-1.39206	0.0200712	893	0.00042083	0.000302308	Uncharacterized protein OS=Paracoccidioides brasiliensis (strain Pb18) OX=502780 GN=PADG_04441 PE=4 SV=2
C1GJS9	-1.3913	0.00937332	1178	0.000855207	0.000614683	Uncharacterized protein OS=Paracoccidioides brasiliensis (strain Pb18) OX=502780 GN=PADG_07515 PE=4 SV=1
C1G8K6	-1.38697	0.0889211	671	0.000168883	0.000121764	Uncharacterized protein OS=Paracoccidioides brasiliensis (strain Pb18) OX=502780 GN=PADG_03592 PE=4 SV=1
C1G110	-1.38573	0.21495	647	0.00012384	8.93683e-05	Uncharacterized protein OS=Paracoccidioides brasiliensis (strain Pb18) OX=502780 GN=PADG_00550 PE=4 SV=1
C1GDY7	-1.38466	0.0678376	696	6.15911e-05	4.4481e-05	Uncharacterized protein OS=Paracoccidioides brasiliensis (strain Pb18) OX=502780 GN=PADG_05473 PE=4 SV=2
C1GC66	-1.3839	0.0438591	2017	0.00046785	0.000338066	Uncharacterized protein OS=Paracoccidioides brasiliensis (strain Pb18) OX=502780 GN=PADG_04588 PE=4 SV=2
C1G7T9	-1.38288	0.0238779	551	0.000318894	0.000230601	Uncharacterized protein OS=Paracoccidioides brasiliensis (strain Pb18) OX=502780 GN=PADG_03244 PE=4 SV=1
C1G422	-1.37949	0.0133635	909	0.000257187	0.000186437	Uncharacterized protein OS=Paracoccidioides brasiliensis (strain Pb18) OX=502780 GN=PADG_01688 PE=4 SV=1
C1GHJ0	-1.37917	0.0293585	2872	0.000514229	0.000372855	60S ribosomal protein L17 OS=Paracoccidioides brasiliensis (strain Pb18) OX=502780 GN=PADG_06726 PE=3 SV=2
C1GFU3	-1.37868	0.185896	2253	0.000101581	7.368e-05	AP complex subunit sigma OS=Paracoccidioides brasiliensis (strain Pb18) OX=502780 GN=PADG_06129 PE=3 SV=2
C1GH39	-1.37611	0.0359772	2363	0.000256906	0.00018669	Uncharacterized protein OS=Paracoccidioides brasiliensis (strain Pb18) OX=502780 GN=PADG_06575 PE=4 SV=2
C1GGC2	-1.3754	0.0142072	838	0.000513487	0.000373337	Uncharacterized protein OS=Paracoccidioides brasiliensis (strain Pb18) OX=502780 GN=PADG_06359 PE=4 SV=2
C1G237	-1.37431	0.0145436	2359	0.000244522	0.000177924	Protein YOP1 OS=Paracoccidioides brasiliensis (strain Pb18) OX=502780 GN=PADG_02203 PE=3 SV=2
C1G8Z9	-1.37219	0.0430046	1319	0.000244146	0.000177924	Uncharacterized protein OS=Paracoccidioides brasiliensis (strain Pb18) OX=502780 GN=PADG_03735 PE=4 SV=1
C1GGX1	-1.37158	0.013701	2024	0.000389551	0.000284017	Uncharacterized protein OS=Paracoccidioides brasiliensis (strain Pb18) OX=502780 GN=PADG_06190 PE=4 SV=1
C1G1I3	-1.37047	0.0187126	2095	0.000166589	0.000121556	Uncharacterized protein OS=Paracoccidioides brasiliensis (strain Pb18) OX=502780 GN=PADG_00723 PE=4 SV=1
C1G4U4	-1.37	0.0494463	1830	6.09387e-05	4.4481e-05	Uncharacterized protein OS=Paracoccidioides brasiliensis (strain Pb18) OX=502780 GN=PADG_01960 PE=4 SV=2
C1GL70	-1.36969	0.022062	603	0.000195214	0.000142525	Uncharacterized protein OS=Paracoccidioides brasiliensis (strain Pb18) OX=502780 GN=PADG_07856 PE=4 SV=1
C1G5J9	-1.36766	0.0850837	888	0.000304432	0.000222594	Uncharacterized protein OS=Paracoccidioides brasiliensis (strain Pb18) OX=502780 GN=PADG_02454 PE=4 SV=1
C1GBC4	-1.35958	0.0174155	2738	0.000205692	0.00015129	alpha-1,2-Mannosidase OS=Paracoccidioides brasiliensis (strain Pb18) OX=502780 GN=PADG_04925 PE=3 SV=1
A0A0A0HUY0	-1.35869	0.0582071	1655	0.000277244	0.000204052	Uncharacterized protein OS=Paracoccidioides brasiliensis (strain Pb18) OX=502780 GN=PADG_12144 PE=4 SV=1
C1G9N0	-1.35384	0.160248	663	7.57026e-05	5.59169e-05	Uncharacterized protein OS=Paracoccidioides brasiliensis (strain Pb18) OX=502780 GN=PADG_03966 PE=4 SV=2
C1G4S9	-1.3537	0.00941196	648	0.000215641	0.000159298	Protein SEY1 OS=Paracoccidioides brasiliensis (strain Pb18) OX=502780 GN=SEY1 PE=3 SV=1
C1G9R2	-1.35201	0.0225359	2312	0.000410343	0.000303505	Uncharacterized protein OS=Paracoccidioides brasiliensis (strain Pb18) OX=502780 GN=PADG_03998 PE=4 SV=1
C1GB60	-1.35127	0.159316	2232	7.55588e-05	5.59169e-05	Uncharacterized protein OS=Paracoccidioides brasiliensis (strain Pb18) OX=502780 GN=PADG_04861 PE=4 SV=1
C1GJQ7	-1.35066	0.141634	619	7.23449e-05	5.35628e-05	Uncharacterized protein OS=Paracoccidioides brasiliensis (strain Pb18) OX=502780 GN=PADG_07493 PE=4 SV=1
C1GG91	-1.34999	0.131507	1802	7.19683e-05	5.33102e-05	Uncharacterized protein OS=Paracoccidioides brasiliensis (strain Pb18) OX=502780 GN=PADG_06328 PE=4 SV=2
C1GIW9	-1.34962	0.0751721	1740	0.000144152	0.00010681	Uncharacterized protein OS=Paracoccidioides brasiliensis (strain Pb18) OX=502780 GN=PADG_07205 PE=4 SV=1
C1GGR5	-1.34865	0.14302	950	0.000132568	9.82967e-05	40S ribosomal protein S20 OS=Paracoccidioides brasiliensis (strain Pb18) OX=502780 GN=PADG_06502 PE=3 SV=1
C1G197	-1.34687	0.0154945	870	0.000503601	0.000373905	Arginase OS=Paracoccidioides brasiliensis (strain Pb18) OX=502780 GN=PADG_00637 PE=3 SV=1
C1G241	-1.34572	0.0900056	2077	0.000143395	0.000106557	Uncharacterized protein OS=Paracoccidioides brasiliensis (strain Pb18) OX=502780 GN=PADG_02207 PE=4 SV=2
C1GBP2	-1.34405	0.0728973	2794	0.000154999	0.000115322	Uncharacterized protein OS=Paracoccidioides brasiliensis (strain Pb18) OX=502780 GN=PADG_05043 PE=4 SV=1
C1GK61	-1.34266	0.138803	2491	7.19169e-05	5.35628e-05	Uncharacterized protein OS=Paracoccidioides brasiliensis (strain Pb18) OX=502780 GN=PADG_07647 PE=4 SV=1
C1GIY9	-1.33877	0.119012	2474	0.000155067	0.000115828	Uncharacterized protein OS=Paracoccidioides brasiliensis (strain Pb18) OX=502780 GN=PADG_07225 PE=4 SV=1
C1GJH5	-1.33731	0.137528	1727	0.000118315	8.84724e-05	Uncharacterized protein OS=Paracoccidioides brasiliensis (strain Pb18) OX=502780 GN=PADG_07411 PE=3 SV=2
C1G0J6	-1.33624	0.0632801	206	0.000224938	0.000168336	Phospho-2-dehydro-3-deoxyheptonate aldolase OS=Paracoccidioides brasiliensis (strain Pb18) OX=502780 GN=PADG_00386 PE=3 SV=1
C1GN06	-1.33624	0.0486759	904	0.000225418	0.000168696	Uncharacterized protein OS=Paracoccidioides brasiliensis (strain Pb18) OX=502780 GN=PADG_08666 PE=4 SV=1
C1GK41	-1.33427	0.0701559	1587	0.000544692	0.000408232	Uncharacterized protein OS=Paracoccidioides brasiliensis (strain Pb18) OX=502780 GN=PADG_07627 PE=4 SV=1
C1G4S2	-1.33419	0.145215	637	0.000154312	0.000115659	Uncharacterized protein OS=Paracoccidioides brasiliensis (strain Pb18) OX=502780 GN=PADG_01938 PE=4 SV=2
C1FZS6	-1.33402	0.0238771	2364	0.000224874	0.000168569	NADH-ubiquinone oxidoreductase 12 kDa subunit, mitochondrial OS=Paracoccidioides brasiliensis (strain Pb18) OX=502780 GN=PADG_00116 PE=4 SV=2
C1GB24	-1.33313	0.14042	252	0.000165028	0.00012379	CAMK/CAMK1/CAMK1-RCK protein kinase OS=Paracoccidioides brasiliensis (strain Pb18) OX=502780 GN=PADG_04460 PE=4 SV=2
C1GFG5	-1.33286	0.0287159	1291	0.00037968	0.00028486	Uncharacterized protein OS=Paracoccidioides brasiliensis (strain Pb18) OX=502780 GN=PADG_06001 PE=3 SV=1
C1GA32	-1.3321	0.0702382	270	0.000133779	0.000100428	60S ribosomal protein L38 OS=Paracoccidioides brasiliensis (strain Pb18) OX=502780 GN=PADG_04118 PE=3 SV=1
C1G2E6	-1.33123	0.0785437	1869	0.000120427	9.0463e-05	Ribosome biogenesis protein ERB1 OS=Paracoccidioides brasiliensis (strain Pb18) OX=502780 GN=ERB1 PE=3 SV=1
C1G2H3	-1.33119	0.030433	2696	0.000225239	0.000169202	mRNA export factor OS=Paracoccidioides brasiliensis (strain Pb18) OX=502780 GN=PADG_02339 PE=4 SV=2
C1FYD3	-1.32434	0.104293	2088	0.000234599	0.000177145	Uncharacterized protein OS=Paracoccidioides brasiliensis (strain Pb18) OX=502780 GN=PADG_00809 PE=4 SV=2
C1GMH8	-1.32253	0.0266514	1280	0.000411763	0.000311344	Maleylacetoacetate isomerase OS=Paracoccidioides brasiliensis (strain Pb18) OX=502780 GN=PADG_08464 PE=3 SV=1
C1G9Y1	-1.32213	0.0154738	1962	0.000471115	0.000356331	Proteasome subunit beta OS=Paracoccidioides brasiliensis (strain Pb18) OX=502780 GN=PADG_04067 PE=3 SV=2
C1GG74	-1.31857	0.0119527	592	0.000164312	0.000124614	Uncharacterized protein OS=Paracoccidioides brasiliensis (strain Pb18) OX=502780 GN=PADG_06311 PE=4 SV=2
C1GFL2	-1.31843	0.0224416	905	0.000327647	0.000248512	40S ribosomal protein S27 OS=Paracoccidioides brasiliensis (strain Pb18) OX=502780 GN=PADG_06048 PE=3 SV=2
C1G0T3	-1.31633	0.0900267	560	0.000257558	0.000195665	Uncharacterized protein OS=Paracoccidioides brasiliensis (strain Pb18) OX=502780 GN=PADG_00473 PE=4 SV=2
C1GGE1	-1.31598	0.0697419	181	0.000256356	0.000194803	Uncharacterized protein OS=Paracoccidioides brasiliensis (strain Pb18) OX=502780 GN=PADG_06378 PE=3 SV=2
C1GII8	-1.31507	0.0707261	1074	0.000103217	7.84883e-05	Uncharacterized protein OS=Paracoccidioides brasiliensis (strain Pb18) OX=502780 GN=PADG_07074 PE=4 SV=1
C1GBI0	-1.31311	0.0501834	2354	0.000326598	0.000248722	Uncharacterized protein OS=Paracoccidioides brasiliensis (strain Pb18) OX=502780 GN=PADG_04981 PE=4 SV=1
C1GB77	-1.31242	0.00961127	2425	0.000653357	0.000497824	NADH-ubiquinone oxidoreductase 40 kDa subunit, mitochondrial OS=Paracoccidioides brasiliensis (strain Pb18) OX=502780 GN=PADG_04878 PE=4 SV=2
C1GDK6	-1.31166	0.0124495	2328	0.000442792	0.000337581	Uncharacterized protein OS=Paracoccidioides brasiliensis (strain Pb18) OX=502780 GN=PADG_05342 PE=4 SV=2
A0A0A0HT60	-1.31078	0.0140627	866	0.000513665	0.000391878	Uncharacterized protein OS=Paracoccidioides brasiliensis (strain Pb18) OX=502780 GN=PADG_11590 PE=4 SV=1
C1GDX9	-1.30995	0.0363504	1640	0.000337352	0.000257531	Pantoate-beta-alanine ligase OS=Paracoccidioides brasiliensis (strain Pb18) OX=502780 GN=PADG_05465 PE=3 SV=2
C1GMA2	-1.30808	0.0236852	2842	0.000418732	0.000320112	Vacuolar-sorting protein snf7 OS=Paracoccidioides brasiliensis (strain Pb18) OX=502780 GN=PADG_08188 PE=4 SV=1
C1GHW6	-1.30766	0.0464015	567	0.0003261	0.000249377	Uncharacterized protein OS=Paracoccidioides brasiliensis (strain Pb18) OX=502780 GN=PADG_06852 PE=3 SV=1
C1FYD2	-1.3055	0.0413059	977	0.00018538	0.000141999	Signal peptidase complex catalytic subunit SEC11 OS=Paracoccidioides brasiliensis (strain Pb18) OX=502780 GN=SEC11 PE=3 SV=1
C1GE16	-1.30522	0.0616456	149	0.000347908	0.000266551	Uncharacterized protein OS=Paracoccidioides brasiliensis (strain Pb18) OX=502780 GN=PADG_05502 PE=4 SV=1
C1FYI4	-1.30234	0.0457219	1743	0.000267335	0.000205272	DNA-directed RNA polymerase subunit OS=Paracoccidioides brasiliensis (strain Pb18) OX=502780 GN=PADG_00860 PE=3 SV=1
C1GG29	-1.29561	0.0323326	1750	0.000151564	0.000116983	Uncharacterized protein OS=Paracoccidioides brasiliensis (strain Pb18) OX=502780 GN=PADG_06266 PE=3 SV=2
C1FZL3	-1.29197	0.00858993	2399	0.000933075	0.000722211	Probable dipeptidyl-aminopeptidase B OS=Paracoccidioides brasiliensis (strain Pb18) OX=502780 GN=DAPB PE=3 SV=1
C1G0E3	-1.29104	0.0105033	81	0.000562002	0.000435308	40S ribosomal protein S16 OS=Paracoccidioides brasiliensis (strain Pb18) OX=502780 GN=PADG_00333 PE=3 SV=1
C1GAE8	-1.28116	0.0171896	2305	0.000432791	0.000337811	Uncharacterized protein OS=Paracoccidioides brasiliensis (strain Pb18) OX=502780 GN=PADG_04234 PE=4 SV=1
C1GIC4	-1.28071	0.00870385	2416	0.000740463	0.000578166	Urease accessory protein UreG OS=Paracoccidioides brasiliensis (strain Pb18) OX=502780 GN=PADG_07010 PE=3 SV=1
C1GD28	-1.27446	0.0113975	473	0.000657902	0.00051622	Protein transporter SEC13 OS=Paracoccidioides brasiliensis (strain Pb18) OX=502780 GN=PADG_05164 PE=3 SV=1
C1GF47	-1.27197	0.0133368	106	0.000418669	0.000329151	60S ribosomal protein L25 OS=Paracoccidioides brasiliensis (strain Pb18) OX=502780 GN=PADG_05883 PE=3 SV=2
C1GDU4	-1.27062	0.0280749	190	0.000226395	0.000178176	Uncharacterized protein OS=Paracoccidioides brasiliensis (strain Pb18) OX=502780 GN=PADG_05430 PE=4 SV=1
C1G6U1	-1.27042	0.0190038	1193	0.000744315	0.00058588	Uncharacterized protein OS=Paracoccidioides brasiliensis (strain Pb18) OX=502780 GN=PADG_02896 PE=4 SV=2
C1G4P8	-1.26458	0.00950284	1244	0.000460388	0.000364064	60S ribosomal protein L35 OS=Paracoccidioides brasiliensis (strain Pb18) OX=502780 GN=PADG_01914 PE=3 SV=2
C1FYS2	-1.26407	0.0187551	547	0.000359578	0.00028446	Uncharacterized protein OS=Paracoccidioides brasiliensis (strain Pb18) OX=502780 GN=PADG_00948 PE=4 SV=1
C1G6H8	-1.26289	0.0200484	115	0.000585588	0.000463688	Uncharacterized protein OS=Paracoccidioides brasiliensis (strain Pb18) OX=502780 GN=PADG_02783 PE=4 SV=1
C1GHM8	-1.26197	0.0102128	1788	0.000112268	8.89619e-05	Succinate dehydrogenase [ubiquinone] cytochrome b small subunit OS=Paracoccidioides brasiliensis (strain Pb18) OX=502780 GN=PADG_06764 PE=3 SV=1
C1GEW2	-1.25612	0.0107746	1557	0.000981849	0.000781655	Uncharacterized protein OS=Paracoccidioides brasiliensis (strain Pb18) OX=502780 GN=PADG_05798 PE=4 SV=1
C1GIH9	-1.25409	0.0099615	2894	0.000625453	0.000498732	Uncharacterized protein OS=Paracoccidioides brasiliensis (strain Pb18) OX=502780 GN=PADG_07065 PE=4 SV=2
C1G5E6	-1.24832	0.0133511	2914	0.000389551	0.000312061	Actin-related protein 2/3 complex subunit 3 OS=Paracoccidioides brasiliensis (strain Pb18) OX=502780 GN=PADG_02401 PE=3 SV=2
C1GIC8	-1.24571	0.0094178	1574	0.000675083	0.000541925	Uncharacterized protein OS=Paracoccidioides brasiliensis (strain Pb18) OX=502780 GN=PADG_07014 PE=4 SV=1
C1G5L8	-1.22834	0.00860206	501	0.000502975	0.000409474	Uncharacterized protein OS=Paracoccidioides brasiliensis (strain Pb18) OX=502780 GN=PADG_02473 PE=3 SV=2
C1GB53	1.24765	0.00867009	2418	0.000770151	0.000960882	Anthranilate synthase component I OS=Paracoccidioides brasiliensis (strain Pb18) OX=502780 GN=PADG_04854 PE=4 SV=2
C1GN13	1.25125	0.0123991	1202	0.000461923	0.000577979	Uncharacterized protein OS=Paracoccidioides brasiliensis (strain Pb18) OX=502780 GN=PADG_08646 PE=4 SV=2
C1FZD8	1.26321	0.0178727	2297	0.000583487	0.000737065	Trehalose-phosphatase OS=Paracoccidioides brasiliensis (strain Pb18) OX=502780 GN=PADG_01164 PE=4 SV=1
C1GMJ7	1.26369	0.0216153	91	0.000316976	0.000400561	Uncharacterized protein OS=Paracoccidioides brasiliensis (strain Pb18) OX=502780 GN=PADG_08483 PE=4 SV=2
C1G2L0	1.2657	0.0169161	64	0.00070886	0.000897206	Uncharacterized protein OS=Paracoccidioides brasiliensis (strain Pb18) OX=502780 GN=PADG_02376 PE=4 SV=2
C1G9L3	1.26835	0.0214241	1669	0.000153987	0.000195309	Orotate phosphoribosyltransferase OS=Paracoccidioides brasiliensis (strain Pb18) OX=502780 GN=PADG_03949 PE=3 SV=1
C1G8G0	1.2724	0.022577	2402	0.000811857	0.00103301	Uncharacterized protein OS=Paracoccidioides brasiliensis (strain Pb18) OX=502780 GN=PADG_03546 PE=4 SV=2
C1GLM8	1.28847	0.00998751	1224	0.000317896	0.0004096	Uncharacterized protein OS=Paracoccidioides brasiliensis (strain Pb18) OX=502780 GN=PADG_08269 PE=4 SV=2
C1GI05	1.29636	0.00907168	532	0.000246606	0.00031969	Probable vacuolar protein sorting-associated protein 16 homolog OS=Paracoccidioides brasiliensis (strain Pb18) OX=502780 GN=PADG_06891 PE=3 SV=2
C1G5S6	1.29804	0.0292095	2169	0.000102658	0.000133254	Uncharacterized protein OS=Paracoccidioides brasiliensis (strain Pb18) OX=502780 GN=PADG_02531 PE=4 SV=2
C1G9U6	1.29972	0.0229769	2058	0.000328843	0.000427404	Uroporphyrinogen decarboxylase OS=Paracoccidioides brasiliensis (strain Pb18) OX=502780 GN=PADG_04032 PE=3 SV=1
C1GIL5	1.30153	0.0275951	2062	0.000307436	0.000400138	Serine/threonine-protein kinase RIO1 OS=Paracoccidioides brasiliensis (strain Pb18) OX=502780 GN=PADG_07101 PE=3 SV=1
C1GFS7	1.30208	0.019373	2087	0.000224874	0.000292804	Uncharacterized protein OS=Paracoccidioides brasiliensis (strain Pb18) OX=502780 GN=PADG_06113 PE=4 SV=1
C1GIE3	1.30334	0.0350335	2704	0.000381476	0.000497194	Uncharacterized protein OS=Paracoccidioides brasiliensis (strain Pb18) OX=502780 GN=PADG_07029 PE=3 SV=1
C1G0L1	1.30417	0.0286236	543	0.000204287	0.000266423	Glucosamine-6-phosphate isomerase OS=Paracoccidioides brasiliensis (strain Pb18) OX=502780 GN=PADG_00401 PE=3 SV=2
C1G9W9	1.3045	0.0519173	2733	0.000205252	0.000267751	Calcium-transporting ATPase OS=Paracoccidioides brasiliensis (strain Pb18) OX=502780 GN=PADG_04055 PE=3 SV=1
C1G6V6	1.3061	0.0579011	937	0.000122593	0.000160119	Uncharacterized protein OS=Paracoccidioides brasiliensis (strain Pb18) OX=502780 GN=PADG_02911 PE=4 SV=1
C1G1Q5	1.30826	0.025685	901	0.000264995	0.000346682	Uncharacterized protein OS=Paracoccidioides brasiliensis (strain Pb18) OX=502780 GN=PADG_02071 PE=3 SV=2
C1GGW8	1.30965	0.0117801	1271	0.000379781	0.000497382	Uncharacterized protein OS=Paracoccidioides brasiliensis (strain Pb18) OX=502780 GN=PADG_06187 PE=4 SV=1
C1G4C1	1.31046	0.0482943	1639	0.000278152	0.000364507	Uncharacterized protein OS=Paracoccidioides brasiliensis (strain Pb18) OX=502780 GN=PADG_01787 PE=4 SV=1
C1G1D6	1.31137	0.0263526	1555	0.000804683	0.00105524	Uncharacterized protein OS=Paracoccidioides brasiliensis (strain Pb18) OX=502780 GN=PADG_00676 PE=4 SV=1
A0A0A0HWH2	1.31451	0.0685413	2460	0.000155182	0.000203988	Uncharacterized protein OS=Paracoccidioides brasiliensis (strain Pb18) OX=502780 GN=PADG_11236 PE=4 SV=1
C1GLP2	1.31453	0.0288208	2158	0.000101514	0.000133443	Uncharacterized protein OS=Paracoccidioides brasiliensis (strain Pb18) OX=502780 GN=PADG_08283 PE=4 SV=2
C1G5K1	1.32069	0.0439291	2042	0.000335972	0.000443715	Uncharacterized protein OS=Paracoccidioides brasiliensis (strain Pb18) OX=502780 GN=PADG_02456 PE=3 SV=1
C1GGX8	1.32243	0.0390174	2483	0.000268051	0.000354477	Xanthine dehydrogenase, molybdopterin binding subunit OS=Paracoccidioides brasiliensis (strain Pb18) OX=502780 GN=PADG_06197 PE=4 SV=2
A0A0A0HYZ8	1.32857	0.0449699	1331	0.000154363	0.000205083	Uncharacterized protein OS=Paracoccidioides brasiliensis (strain Pb18) OX=502780 GN=PADG_11417 PE=3 SV=1
A0A0A0HUN4	1.33148	0.0103035	1211	0.000420255	0.000559563	Uncharacterized protein OS=Paracoccidioides brasiliensis (strain Pb18) OX=502780 GN=PADG_11857 PE=4 SV=1
C1GET2	1.33262	0.0602147	1309	0.000134051	0.000178639	Serine/threonine-protein phosphatase 2A 56 kDa regulatory subunit OS=Paracoccidioides brasiliensis (strain Pb18) OX=502780 GN=PADG_05768 PE=3 SV=2
C1GLB3	1.33464	0.0398304	1683	0.000226619	0.000302455	Signal recognition particle subunit SRP68 OS=Paracoccidioides brasiliensis (strain Pb18) OX=502780 GN=PADG_07899 PE=3 SV=2
Q1XAA0	1.33479	0.0321671	203	0.000166196	0.000221836	NADH-ubiquinone oxidoreductase chain 4 OS=Paracoccidioides brasiliensis (strain Pb18) OX=502780 GN=nad4 PE=3 SV=1
C1G534	1.33556	0.0926784	1321	0.000133284	0.000178008	Uncharacterized protein OS=Paracoccidioides brasiliensis (strain Pb18) OX=502780 GN=PADG_02050 PE=4 SV=1
C1G1F0	1.33622	0.0363254	150	0.000206134	0.000275442	Uncharacterized protein OS=Paracoccidioides brasiliensis (strain Pb18) OX=502780 GN=PADG_00690 PE=4 SV=2
C1GG64	1.34118	0.0282102	839	0.000298349	0.00040014	Uncharacterized protein OS=Paracoccidioides brasiliensis (strain Pb18) OX=502780 GN=PADG_06301 PE=3 SV=2
C1G000	1.34128	0.167723	122	0.000185279	0.000248512	IMP-specific 5'-nucleotidase 1 OS=Paracoccidioides brasiliensis (strain Pb18) OX=502780 GN=PADG_00190 PE=3 SV=2
C1GAC4	1.34206	0.0320058	2029	0.000297838	0.000399717	Uncharacterized protein OS=Paracoccidioides brasiliensis (strain Pb18) OX=502780 GN=PADG_04210 PE=4 SV=1
C1GD03	1.34449	0.0123144	100	0.00032982	0.000443441	Uncharacterized protein OS=Paracoccidioides brasiliensis (strain Pb18) OX=502780 GN=PADG_05139 PE=3 SV=1
C1GLU9	1.34488	0.0251812	2700	0.000277788	0.00037359	Uncharacterized protein OS=Paracoccidioides brasiliensis (strain Pb18) OX=502780 GN=PADG_08340 PE=4 SV=2
C1GF62	1.34528	0.0623186	1615	0.00020412	0.000274599	Uncharacterized protein OS=Paracoccidioides brasiliensis (strain Pb18) OX=502780 GN=PADG_05898 PE=4 SV=1
C1GM58	1.34673	0.0675177	2532	0.000184561	0.000248553	Cleavage and polyadenylation specificity factor subunit 2 OS=Paracoccidioides brasiliensis (strain Pb18) OX=502780 GN=PADG_08144 PE=3 SV=2
C1G730	1.35247	0.122876	2157	7.19169e-05	9.72653e-05	tRNA (guanine-N(7)-)-methyltransferase OS=Paracoccidioides brasiliensis (strain Pb18) OX=502780 GN=TRM8 PE=3 SV=2
C1GDY6	1.35542	0.00862304	2063	0.000216785	0.000293836	Uncharacterized protein OS=Paracoccidioides brasiliensis (strain Pb18) OX=502780 GN=PADG_05472 PE=4 SV=1
C1GKJ4	1.35625	0.1209	1664	0.000196222	0.000266128	Phosphoribosylglycinamide formyltransferase OS=Paracoccidioides brasiliensis (strain Pb18) OX=502780 GN=PADG_07780 PE=3 SV=1
C1GJN5	1.35675	0.0119613	898	0.000203404	0.000275968	Uncharacterized protein OS=Paracoccidioides brasiliensis (strain Pb18) OX=502780 GN=PADG_07471 PE=4 SV=2
C1GLE3	1.35838	0.0310582	2142	0.000143609	0.000195077	Uncharacterized protein OS=Paracoccidioides brasiliensis (strain Pb18) OX=502780 GN=PADG_08079 PE=4 SV=2
C1G1E5	1.36153	0.02939	2337	0.000391603	0.00053318	3-hydroxy-3-methylglutaryl coenzyme A synthase OS=Paracoccidioides brasiliensis (strain Pb18) OX=502780 GN=PADG_00685 PE=3 SV=2
C1GFS6	1.36419	0.030368	466	0.000351731	0.000479829	Phosphoribosylaminoimidazolesuccinocarboxamide synthase OS=Paracoccidioides brasiliensis (strain Pb18) OX=502780 GN=PADG_06112 PE=3 SV=1
A0A0A0HTQ5	1.36539	0.0849713	1339	0.000143118	0.000195412	Uncharacterized protein OS=Paracoccidioides brasiliensis (strain Pb18) OX=502780 GN=PADG_12250 PE=4 SV=1
C1GB14	1.36633	0.0725238	2086	0.000175821	0.00024023	Histone deacetylase RPD3 OS=Paracoccidioides brasiliensis (strain Pb18) OX=502780 GN=PADG_04450 PE=4 SV=2
C1GJ68	1.3672	0.0690907	1262	0.00023389	0.000319773	Uncharacterized protein OS=Paracoccidioides brasiliensis (strain Pb18) OX=502780 GN=PADG_07304 PE=4 SV=2
C1GHF5	1.36758	0.0252107	2339	0.00031752	0.000434233	Uncharacterized protein OS=Paracoccidioides brasiliensis (strain Pb18) OX=502780 GN=PADG_06691 PE=4 SV=2
C1FZ00	1.36769	0.00959285	2360	0.000195105	0.000266843	60S ribosomal protein L43 OS=Paracoccidioides brasiliensis (strain Pb18) OX=502780 GN=PADG_01026 PE=4 SV=2
C1FYW9	1.36961	0.111717	1209	7.12009e-05	9.75178e-05	Ubiquitin-40S ribosomal protein S27a OS=Paracoccidioides brasiliensis (strain Pb18) OX=502780 GN=PADG_00995 PE=4 SV=1; Additional IDs concatenated into MaxParsimony group: C1GLA5, contaminant_UBIQUITIN08
C1GN94	1.36986	0.0439456	884	0.000227329	0.00031141	Geranylgeranyl transferase type-2 subunit beta OS=Paracoccidioides brasiliensis (strain Pb18) OX=502780 GN=PADG_08728 PE=3 SV=1
C1G2K1	1.37037	0.0468424	858	0.00038837	0.000532211	Glycerol-3-phosphate dehydrogenase OS=Paracoccidioides brasiliensis (strain Pb18) OX=502780 GN=PADG_02367 PE=3 SV=2
C1GHC0	1.37163	0.0432245	2566	0.000143296	0.00019655	Uncharacterized protein OS=Paracoccidioides brasiliensis (strain Pb18) OX=502780 GN=PADG_06656 PE=4 SV=1
C1G9D8	1.37263	0.0707994	930	0.000144492	0.000198333	Uncharacterized protein OS=Paracoccidioides brasiliensis (strain Pb18) OX=502780 GN=PADG_03874 PE=4 SV=1
C1GKM9	1.37271	0.131822	2759	0.000154038	0.00021145	Uncharacterized protein OS=Paracoccidioides brasiliensis (strain Pb18) OX=502780 GN=PADG_07815 PE=4 SV=2
C1GA86	1.37291	0.154464	2128	0.000142856	0.000196129	Uncharacterized protein OS=Paracoccidioides brasiliensis (strain Pb18) OX=502780 GN=PADG_04172 PE=4 SV=1
C1G7E4	1.37407	0.0135545	801	0.000589071	0.000809423	Uncharacterized protein OS=Paracoccidioides brasiliensis (strain Pb18) OX=502780 GN=PADG_03099 PE=3 SV=1
C1GGK2	1.37522	0.143102	982	5.13289e-05	7.05884e-05	Uncharacterized protein OS=Paracoccidioides brasiliensis (strain Pb18) OX=502780 GN=PADG_06439 PE=3 SV=2
C1GIL8	1.37572	0.111493	2702	0.000174147	0.000239576	NADH-cytochrome b5 reductase OS=Paracoccidioides brasiliensis (strain Pb18) OX=502780 GN=PADG_07104 PE=3 SV=2
C1GDH2	1.37846	0.0799221	1806	0.000123297	0.00016996	Uncharacterized protein OS=Paracoccidioides brasiliensis (strain Pb18) OX=502780 GN=PADG_05308 PE=4 SV=2
C1G460	1.38209	0.0267625	2149	0.00012253	0.000169348	Uncharacterized protein OS=Paracoccidioides brasiliensis (strain Pb18) OX=502780 GN=PADG_01726 PE=4 SV=2
C1FYU2	1.38228	0.0265936	1310	0.000205591	0.000284184	Uncharacterized protein OS=Paracoccidioides brasiliensis (strain Pb18) OX=502780 GN=PADG_00968 PE=4 SV=1
C1GEL8	1.38292	0.0130065	2369	0.000616351	0.000852365	Uncharacterized protein OS=Paracoccidioides brasiliensis (strain Pb18) OX=502780 GN=PADG_05704 PE=4 SV=2
C1G4M2	1.38343	0.0517223	1361	0.000102658	0.00014202	Uncharacterized protein OS=Paracoccidioides brasiliensis (strain Pb18) OX=502780 GN=PADG_01888 PE=4 SV=1
C1GD41	1.3866	0.0681696	1335	0.000102773	0.000142504	50S ribosomal protein L3 OS=Paracoccidioides brasiliensis (strain Pb18) OX=502780 GN=PADG_05177 PE=3 SV=1
C1GBB5	1.38707	0.0573799	1686	0.000205276	0.000284733	Uncharacterized protein OS=Paracoccidioides brasiliensis (strain Pb18) OX=502780 GN=PADG_04916 PE=4 SV=2
C1GHP7	1.39066	0.0494421	264	0.000101942	0.000141767	Uncharacterized protein OS=Paracoccidioides brasiliensis (strain Pb18) OX=502780 GN=PADG_06783 PE=4 SV=2
Q1XA98	1.3909	0.0377739	2140	0.000165884	0.000230729	ATP synthase subunit a OS=Paracoccidioides brasiliensis (strain Pb18) OX=502780 GN=atp6 PE=3 SV=1
C1GJX3	1.39169	0.0299241	2153	0.00010223	0.000142272	Uncharacterized protein OS=Paracoccidioides brasiliensis (strain Pb18) OX=502780 GN=PADG_07559 PE=3 SV=1
C1GFI8	1.39182	0.204644	998	8.24482e-05	0.000114753	Uncharacterized protein OS=Paracoccidioides brasiliensis (strain Pb18) OX=502780 GN=PADG_06024 PE=4 SV=1
C1GKJ5	1.39197	0.00853617	111	0.000288038	0.000400938	Pyridoxal kinase OS=Paracoccidioides brasiliensis (strain Pb18) OX=502780 GN=PADG_07781 PE=4 SV=1
C1FZY4	1.39444	0.08877	2136	8.26707e-05	0.000115279	Uncharacterized protein OS=Paracoccidioides brasiliensis (strain Pb18) OX=502780 GN=PADG_00174 PE=4 SV=1
C1G983	1.39593	0.0877762	195	0.000102658	0.000143303	Uncharacterized protein OS=Paracoccidioides brasiliensis (strain Pb18) OX=502780 GN=PADG_03819 PE=4 SV=2
C1GDG7	1.39666	0.173017	2793	8.38331e-05	0.000117086	Uncharacterized protein OS=Paracoccidioides brasiliensis (strain Pb18) OX=502780 GN=PADG_05303 PE=4 SV=1
C1GF65	1.39746	0.0748938	1701	0.000140075	0.000195749	Uracil phosphoribosyltransferase OS=Paracoccidioides brasiliensis (strain Pb18) OX=502780 GN=PADG_05901 PE=4 SV=1
C1GFJ8	1.39861	0.103733	2069	0.000101514	0.000141978	Uncharacterized protein OS=Paracoccidioides brasiliensis (strain Pb18) OX=502780 GN=PADG_06034 PE=4 SV=1
C1GC63	1.40176	0.109826	1341	0.00015253	0.000213809	Uncharacterized protein OS=Paracoccidioides brasiliensis (strain Pb18) OX=502780 GN=PADG_04585 PE=4 SV=2
C1G695	1.40727	0.0200668	489	0.000340485	0.000479155	ATP-dependent DNA helicase II subunit 1 OS=Paracoccidioides brasiliensis (strain Pb18) OX=502780 GN=PADG_02700 PE=4 SV=2
C1GJJ6	1.40868	0.0297356	173	0.000113412	0.00015976	Uncharacterized protein OS=Paracoccidioides brasiliensis (strain Pb18) OX=502780 GN=PADG_07432 PE=4 SV=2
C1G8P5	1.40876	0.0540652	1633	0.000163168	0.000229866	Uncharacterized protein OS=Paracoccidioides brasiliensis (strain Pb18) OX=502780 GN=PADG_03631 PE=4 SV=2
C1GL42	1.41499	0.0425435	429	0.000175494	0.000248324	Uncharacterized protein OS=Paracoccidioides brasiliensis (strain Pb18) OX=502780 GN=PADG_08049 PE=4 SV=1
C1GIP9	1.41534	0.0306675	2697	0.000213993	0.000302874	Uncharacterized protein OS=Paracoccidioides brasiliensis (strain Pb18) OX=502780 GN=PADG_07135 PE=3 SV=1
C1GKN0	1.41897	0.00926393	966	0.000113035	0.000160393	RNA cytidine acetyltransferase OS=Paracoccidioides brasiliensis (strain Pb18) OX=502780 GN=NAT10 PE=3 SV=2
C1GEB6	1.41958	0.0155345	1194	0.000399564	0.000567213	DNA ligase OS=Paracoccidioides brasiliensis (strain Pb18) OX=502780 GN=PADG_05602 PE=3 SV=2
C1G4H5	1.42087	0.0360804	2126	8.15781e-05	0.000115912	Cytochrome c oxidase assembly protein COX19 OS=Paracoccidioides brasiliensis (strain Pb18) OX=502780 GN=PADG_01841 PE=4 SV=1
C1G293	1.42157	0.0219108	2472	0.00020646	0.000293496	Uncharacterized protein OS=Paracoccidioides brasiliensis (strain Pb18) OX=502780 GN=PADG_02259 PE=4 SV=2
C1G521	1.42182	0.0291062	2476	0.000275602	0.000391857	Uncharacterized protein OS=Paracoccidioides brasiliensis (strain Pb18) OX=502780 GN=PADG_02037 PE=4 SV=2
C1GHY8	1.42194	0.031963	169	0.000174414	0.000248007	Uncharacterized protein OS=Paracoccidioides brasiliensis (strain Pb18) OX=502780 GN=PADG_06874 PE=4 SV=1
C1GGB6	1.42312	0.0231019	2033	0.00026931	0.00038326	Transmembrane 9 superfamily member OS=Paracoccidioides brasiliensis (strain Pb18) OX=502780 GN=PADG_06353 PE=3 SV=1
C1G3W8	1.42655	0.0240215	2789	0.000175003	0.00024965	Uncharacterized protein OS=Paracoccidioides brasiliensis (strain Pb18) OX=502780 GN=PADG_01634 PE=4 SV=2
C1G1X8	1.4303	0.0414992	2073	0.000205379	0.000293753	Uncharacterized protein OS=Paracoccidioides brasiliensis (strain Pb18) OX=502780 GN=PADG_02144 PE=4 SV=2
C1G2I2	1.43058	0.0450289	892	0.000174126	0.000249102	Pheromone-processing carboxypeptidase KEX1 OS=Paracoccidioides brasiliensis (strain Pb18) OX=502780 GN=KEX1 PE=3 SV=1
C1GMS7	1.43167	0.034224	2816	9.22805e-05	0.000132115	GPI mannosyltransferase 1 OS=Paracoccidioides brasiliensis (strain Pb18) OX=502780 GN=PADG_08571 PE=3 SV=1
C1G555	1.43537	0.024392	502	0.000296783	0.000425994	Uncharacterized protein OS=Paracoccidioides brasiliensis (strain Pb18) OX=502780 GN=PADG_03425 PE=4 SV=1
C1G0W1	1.43948	0.0152486	842	0.000308525	0.000444115	Uncharacterized protein OS=Paracoccidioides brasiliensis (strain Pb18) OX=502780 GN=PADG_00501 PE=4 SV=1
C1GK52	1.4417	0.0165828	2304	0.000123412	0.000177924	Uncharacterized protein OS=Paracoccidioides brasiliensis (strain Pb18) OX=502780 GN=PADG_07638 PE=4 SV=2
C1GMJ3	1.44307	0.0532277	2494	0.000178329	0.000257342	Uncharacterized protein OS=Paracoccidioides brasiliensis (strain Pb18) OX=502780 GN=PADG_08479 PE=4 SV=1
C1G1R0	1.44328	0.0131245	1846	0.000554005	0.000799584	Uncharacterized protein OS=Paracoccidioides brasiliensis (strain Pb18) OX=502780 GN=PADG_02076 PE=4 SV=2
C1GMX2	1.44403	0.00855683	138	0.000215463	0.000311135	Histidinol-phosphatase OS=Paracoccidioides brasiliensis (strain Pb18) OX=502780 GN=PADG_08623 PE=3 SV=2
C1G949	1.44433	0.0172745	2346	0.000184549	0.000266549	Uncharacterized protein OS=Paracoccidioides brasiliensis (strain Pb18) OX=502780 GN=PADG_03785 PE=4 SV=1
C1G0G8	1.44752	0.0225066	596	0.000122567	0.000177418	Uncharacterized protein OS=Paracoccidioides brasiliensis (strain Pb18) OX=502780 GN=PADG_00358 PE=4 SV=2
C1GIH3	1.44799	0.0109483	1720	0.000123021	0.000178133	Replication factor C subunit 5 OS=Paracoccidioides brasiliensis (strain Pb18) OX=502780 GN=PADG_07059 PE=4 SV=2
C1GF82	1.44819	0.0238706	2529	0.000153559	0.000222382	Uncharacterized protein OS=Paracoccidioides brasiliensis (strain Pb18) OX=502780 GN=PADG_05918 PE=4 SV=2
C1GET9	1.44846	0.0317602	897	0.000196096	0.000284039	DNA helicase OS=Paracoccidioides brasiliensis (strain Pb18) OX=502780 GN=PADG_05775 PE=3 SV=1
C1G2U4	1.45102	0.072101	2227	6.75393e-05	9.80007e-05	Uncharacterized protein OS=Paracoccidioides brasiliensis (strain Pb18) OX=502780 GN=PADG_01260 PE=4 SV=1
C1GLQ9	1.45269	0.0141843	1219	0.000359967	0.000522921	Ornithine carbamoyltransferase, mitochondrial OS=Paracoccidioides brasiliensis (strain Pb18) OX=502780 GN=PADG_08300 PE=3 SV=2
A0A0A0HWU6	1.45548	0.0695855	2115	0.000103802	0.000151081	Tubulin gamma chain OS=Paracoccidioides brasiliensis (strain Pb18) OX=502780 GN=PADG_11375 PE=3 SV=1
C1GFU4	1.45583	0.0338792	1637	0.000237801	0.000346199	Uncharacterized protein OS=Paracoccidioides brasiliensis (strain Pb18) OX=502780 GN=PADG_06130 PE=4 SV=2
C1GDM8	1.45831	0.0686369	944	0.000183935	0.000268233	DNA ligase OS=Paracoccidioides brasiliensis (strain Pb18) OX=502780 GN=PADG_05364 PE=3 SV=2
C1G267	1.45832	0.0287069	1297	0.000206735	0.000301486	Uncharacterized protein OS=Paracoccidioides brasiliensis (strain Pb18) OX=502780 GN=PADG_02233 PE=4 SV=2
C1GER3	1.46069	0.0892011	1800	5.04154e-05	7.36415e-05	Uncharacterized protein OS=Paracoccidioides brasiliensis (strain Pb18) OX=502780 GN=PADG_05749 PE=4 SV=2
C1G1A1	1.46758	0.144282	1671	0.000114	0.000167305	Uncharacterized protein OS=Paracoccidioides brasiliensis (strain Pb18) OX=502780 GN=PADG_00641 PE=4 SV=2
C1GKR1	1.46819	0.0112704	947	0.000102658	0.000150721	Pyrimidine 5'-nucleotidase OS=Paracoccidioides brasiliensis (strain Pb18) OX=502780 GN=PADG_07918 PE=4 SV=2
A0A0A0HUA0	1.47245	0.0117808	1623	0.000307757	0.000453156	Uncharacterized protein OS=Paracoccidioides brasiliensis (strain Pb18) OX=502780 GN=PADG_12276 PE=4 SV=1
C1G0F5	1.47326	0.0597447	95	0.000174791	0.000257512	Uncharacterized protein OS=Paracoccidioides brasiliensis (strain Pb18) OX=502780 GN=PADG_00345 PE=4 SV=1
C1GLV0	1.47491	0.0139738	1311	0.000132919	0.000196044	Histone chaperone OS=Paracoccidioides brasiliensis (strain Pb18) OX=502780 GN=PADG_08341 PE=4 SV=1
C1GN66	1.47776	0.012072	210	0.000132479	0.000195771	Uncharacterized protein OS=Paracoccidioides brasiliensis (strain Pb18) OX=502780 GN=PADG_08702 PE=4 SV=1
C1GE59	1.47984	0.0136936	486	0.000245661	0.000363539	Pre-mRNA-splicing factor ATP-dependent RNA helicase PRP43 OS=Paracoccidioides brasiliensis (strain Pb18) OX=502780 GN=PADG_05545 PE=4 SV=1
C1GJA3	1.48088	0.0663	1653	0.000167557	0.000248132	Uncharacterized protein OS=Paracoccidioides brasiliensis (strain Pb18) OX=502780 GN=PADG_07339 PE=4 SV=2
C1G9A0	1.48461	0.012049	911	0.000215917	0.000320551	Uncharacterized protein OS=Paracoccidioides brasiliensis (strain Pb18) OX=502780 GN=PADG_03836 PE=4 SV=2
C1G2Y8	1.48534	0.0276677	194	0.000214874	0.000319161	Uncharacterized protein OS=Paracoccidioides brasiliensis (strain Pb18) OX=502780 GN=PADG_01304 PE=4 SV=2
C1G4F8	1.4886	0.0854225	605	7.76829e-05	0.000115638	Uncharacterized protein OS=Paracoccidioides brasiliensis (strain Pb18) OX=502780 GN=PADG_01824 PE=4 SV=1
A0A0A0HVQ5	1.49037	0.108973	2776	0.000102005	0.000152026	Uncharacterized protein OS=Paracoccidioides brasiliensis (strain Pb18) OX=502780 GN=PADG_11661 PE=4 SV=1
C1G2Y3	1.49169	0.0768613	2574	0.000142613	0.000212734	Uncharacterized protein OS=Paracoccidioides brasiliensis (strain Pb18) OX=502780 GN=PADG_01299 PE=4 SV=1
C1G980	1.49186	0.035757	1326	0.000101043	0.000150742	Uncharacterized protein OS=Paracoccidioides brasiliensis (strain Pb18) OX=502780 GN=PADG_03816 PE=4 SV=1
C1GJW7	1.49249	0.0648571	2805	0.000100831	0.000150489	Uncharacterized protein OS=Paracoccidioides brasiliensis (strain Pb18) OX=502780 GN=PADG_07553 PE=4 SV=1
C1G911	1.49286	0.0318495	2053	0.000267034	0.000398644	Alternative oxidase OS=Paracoccidioides brasiliensis (strain Pb18) OX=502780 GN=PADG_03747 PE=3 SV=1
C1GBH6	1.49328	0.0241094	1713	0.000112984	0.000168716	Uncharacterized protein OS=Paracoccidioides brasiliensis (strain Pb18) OX=502780 GN=PADG_04977 PE=4 SV=2
C1GCX1	1.49913	0.0394438	2526	0.000141749	0.000212501	Uncharacterized protein OS=Paracoccidioides brasiliensis (strain Pb18) OX=502780 GN=PADG_05107 PE=3 SV=1
C1G696	1.50033	0.0138635	1220	0.000297584	0.000446474	Ferrochelatase OS=Paracoccidioides brasiliensis (strain Pb18) OX=502780 GN=PADG_02701 PE=3 SV=2
C1GC24	1.50404	0.0146112	929	0.000165159	0.000248406	Uncharacterized protein OS=Paracoccidioides brasiliensis (strain Pb18) OX=502780 GN=PADG_04546 PE=4 SV=1
C1GHG2	1.50451	0.0360284	1305	0.000153762	0.000231337	Uncharacterized protein OS=Paracoccidioides brasiliensis (strain Pb18) OX=502780 GN=PADG_06698 PE=4 SV=2
C1GLP9	1.50508	0.0090983	1625	0.00022421	0.000337454	Diphosphomevalonate decarboxylase OS=Paracoccidioides brasiliensis (strain Pb18) OX=502780 GN=PADG_08290 PE=3 SV=2
C1GN02	1.50633	0.0126967	2720	0.00019515	0.000293961	Cystathionine beta-lyase OS=Paracoccidioides brasiliensis (strain Pb18) OX=502780 GN=PADG_08662 PE=3 SV=1
C1GAZ4	1.51029	0.0231513	2541	0.000112268	0.000169557	Uncharacterized protein OS=Paracoccidioides brasiliensis (strain Pb18) OX=502780 GN=PADG_04430 PE=3 SV=2
C1G325	1.5117	0.151758	493	0.000176336	0.000266567	Uncharacterized protein OS=Paracoccidioides brasiliensis (strain Pb18) OX=502780 GN=PADG_01341 PE=4 SV=2
C1G5D3	1.5127	0.128444	555	0.00012276	0.000185699	Uncharacterized protein OS=Paracoccidioides brasiliensis (strain Pb18) OX=502780 GN=PADG_02388 PE=4 SV=1
C1GBL7	1.51875	0.0705245	2048	0.000186786	0.000283681	Uncharacterized protein OS=Paracoccidioides brasiliensis (strain Pb18) OX=502780 GN=PADG_05018 PE=4 SV=2
C1GJH7	1.51898	0.0113686	829	0.000381072	0.000578842	Uncharacterized protein OS=Paracoccidioides brasiliensis (strain Pb18) OX=502780 GN=PADG_07413 PE=4 SV=1
C1GFT0	1.52006	0.00898003	1270	0.00017577	0.000267182	Uncharacterized protein OS=Paracoccidioides brasiliensis (strain Pb18) OX=502780 GN=PADG_06116 PE=3 SV=2
C1G231	1.52053	0.0149863	919	0.000174939	0.000266	Uncharacterized protein OS=Paracoccidioides brasiliensis (strain Pb18) OX=502780 GN=PADG_02197 PE=4 SV=1
C1G4H2	1.52378	0.00996933	170	8.16417e-05	0.000124404	Uncharacterized protein OS=Paracoccidioides brasiliensis (strain Pb18) OX=502780 GN=PADG_01838 PE=4 SV=1
C1GMC7	1.52545	0.0318178	2804	7.61091e-05	0.000116101	Ribosomal protein S2 OS=Paracoccidioides brasiliensis (strain Pb18) OX=502780 GN=PADG_08213 PE=3 SV=2
C1G8P3	1.52919	0.0126839	2734	0.000121877	0.000186373	Uncharacterized protein OS=Paracoccidioides brasiliensis (strain Pb18) OX=502780 GN=PADG_03629 PE=4 SV=1
C1G0L7	1.53015	0.0557465	2758	0.000168305	0.000257531	N-acetylglucosamine-6-phosphate deacetylase OS=Paracoccidioides brasiliensis (strain Pb18) OX=502780 GN=PADG_00407 PE=4 SV=1
C1GF02	1.53192	0.0260435	2538	0.000133572	0.000204621	Mannosyltransferase OS=Paracoccidioides brasiliensis (strain Pb18) OX=502780 GN=PADG_05838 PE=3 SV=2
C1G9Q5	1.53221	0.0285344	1365	0.000127962	0.000196065	Uncharacterized protein OS=Paracoccidioides brasiliensis (strain Pb18) OX=502780 GN=PADG_03991 PE=4 SV=2
C1GJN4	1.5324	0.0695714	2137	8.7081e-05	0.000133443	Succinate dehydrogenase, cytochrome b556 subunit OS=Paracoccidioides brasiliensis (strain Pb18) OX=502780 GN=PADG_07470 PE=4 SV=1
C1G3G8	1.53319	0.0410324	2927	0.000243339	0.000373085	Trehalase OS=Paracoccidioides brasiliensis (strain Pb18) OX=502780 GN=PADG_01484 PE=3 SV=2
C1G5E7	1.5357	0.0266017	903	0.000185929	0.000285532	Uncharacterized protein OS=Paracoccidioides brasiliensis (strain Pb18) OX=502780 GN=PADG_02402 PE=4 SV=2
C1GDJ1	1.53618	0.0108111	481	0.000392115	0.000602359	Uncharacterized protein OS=Paracoccidioides brasiliensis (strain Pb18) OX=502780 GN=PADG_05327 PE=4 SV=2
C1GM66	1.54723	0.0553266	217	5.13289e-05	7.94177e-05	Uncharacterized protein OS=Paracoccidioides brasiliensis (strain Pb18) OX=502780 GN=PADG_08152 PE=4 SV=1
A0A0A0HT87	1.55506	0.0134565	1245	0.000246108	0.000382713	Rab proteins geranylgeranyltransferase OS=Paracoccidioides brasiliensis (strain Pb18) OX=502780 GN=PADG_12381 PE=3 SV=1
C1G9S0	1.56157	0.0635644	1691	0.000102281	0.000159719	Uncharacterized protein OS=Paracoccidioides brasiliensis (strain Pb18) OX=502780 GN=PADG_04006 PE=4 SV=1
C1GE55	1.56197	0.0527055	2583	7.66442e-05	0.000119716	Uncharacterized protein OS=Paracoccidioides brasiliensis (strain Pb18) OX=502780 GN=PADG_05541 PE=4 SV=2
C1G9Q8	1.56279	0.042163	2247	6.36903e-05	9.95344e-05	Uncharacterized protein OS=Paracoccidioides brasiliensis (strain Pb18) OX=502780 GN=PADG_03994 PE=4 SV=1
C1GM54	1.57119	0.0199476	1689	0.000152843	0.000240145	Uncharacterized protein OS=Paracoccidioides brasiliensis (strain Pb18) OX=502780 GN=PADG_08140 PE=4 SV=2
C1GHB0	1.57216	0.00939992	2785	0.000112984	0.000177628	Ubiquitin carboxyl-terminal hydrolase OS=Paracoccidioides brasiliensis (strain Pb18) OX=502780 GN=PADG_06646 PE=3 SV=1
C1GG36	1.57251	0.0233778	1627	0.000175066	0.000275294	Calcineurin B OS=Paracoccidioides brasiliensis (strain Pb18) OX=502780 GN=CNB PE=4 SV=2
C1G2S5	1.58324	0.144519	237	8.4749e-05	0.000134178	Uncharacterized protein OS=Paracoccidioides brasiliensis (strain Pb18) OX=502780 GN=PADG_01241 PE=4 SV=2
C1GIQ1	1.58727	0.0160701	1276	0.000123789	0.000196486	Uncharacterized protein OS=Paracoccidioides brasiliensis (strain Pb18) OX=502780 GN=PADG_07137 PE=3 SV=2
C1G1W5	1.58738	0.0242418	177	0.000118126	0.000187511	Uncharacterized protein OS=Paracoccidioides brasiliensis (strain Pb18) OX=502780 GN=PADG_02131 PE=4 SV=1
C1FYX7	1.59007	0.0115645	2942	0.00011774	0.000187215	Uncharacterized protein OS=Paracoccidioides brasiliensis (strain Pb18) OX=502780 GN=PADG_01003 PE=4 SV=1
C1GCY2	1.59086	0.0648143	223	0.000122318	0.00019459	Eukaryotic translation initiation factor 3 subunit K OS=Paracoccidioides brasiliensis (strain Pb18) OX=502780 GN=PADG_05118 PE=3 SV=1
C1GE91	1.59128	0.0258542	192	0.000133687	0.000212733	Uncharacterized protein OS=Paracoccidioides brasiliensis (strain Pb18) OX=502780 GN=PADG_05577 PE=4 SV=2
C1GHY9	1.59185	0.016057	1781	6.15911e-05	9.80438e-05	50S ribosomal protein L4 OS=Paracoccidioides brasiliensis (strain Pb18) OX=502780 GN=PADG_06875 PE=4 SV=2
C1GJU2	1.59595	0.0311561	1652	0.000278977	0.000445233	Methylenetetrahydrofolate reductase OS=Paracoccidioides brasiliensis (strain Pb18) OX=502780 GN=PADG_07528 PE=3 SV=1
C1GC97	1.60223	0.0118778	843	0.000267034	0.00042785	Glutamine-dependent NAD(+) synthetase OS=Paracoccidioides brasiliensis (strain Pb18) OX=502780 GN=PADG_04619 PE=3 SV=2
C1G2C4	1.60361	0.0411018	1348	7.74596e-05	0.000124215	Ribosomal protein L17 OS=Paracoccidioides brasiliensis (strain Pb18) OX=502780 GN=PADG_02290 PE=3 SV=1
C1GBL3	1.60992	0.0104892	2779	0.000154376	0.000248533	Uncharacterized protein OS=Paracoccidioides brasiliensis (strain Pb18) OX=502780 GN=PADG_05014 PE=4 SV=2
C1G2M4	1.61543	0.11615	2098	0.000104856	0.000169388	Protein YIP OS=Paracoccidioides brasiliensis (strain Pb18) OX=502780 GN=PADG_01190 PE=3 SV=2
A0A0A0HVN3	1.61581	0.00924158	527	0.000202964	0.000327951	ATP-dependent RNA helicase DBP2 OS=Paracoccidioides brasiliensis (strain Pb18) OX=502780 GN=PADG_11254 PE=3 SV=1
A0A0A0HU37	1.61629	0.0671126	2584	0.000127381	0.000205884	Uncharacterized protein OS=Paracoccidioides brasiliensis (strain Pb18) OX=502780 GN=PADG_11673 PE=3 SV=1
C1G8Q6	1.6195	0.0212338	2690	0.000296476	0.000480143	Tryptophan-tRNA ligase OS=Paracoccidioides brasiliensis (strain Pb18) OX=502780 GN=PADG_03642 PE=3 SV=2
C1GDR5	1.62534	0.0384748	1748	8.22305e-05	0.000133652	Uncharacterized protein OS=Paracoccidioides brasiliensis (strain Pb18) OX=502780 GN=PADG_05401 PE=4 SV=2
C1FZN7	1.62639	0.0178907	2572	0.000103853	0.000168906	Uncharacterized protein OS=Paracoccidioides brasiliensis (strain Pb18) OX=502780 GN=PADG_00077 PE=4 SV=2
C1G8W2	1.62745	0.0785301	234	0.000103825	0.000168969	Uncharacterized protein OS=Paracoccidioides brasiliensis (strain Pb18) OX=502780 GN=PADG_03698 PE=4 SV=1
A0A0A0HVM2	1.62911	0.116768	1749	8.73691e-05	0.000142334	Inositol hexakisphosphate and diphosphoinositol-pentakisphosphate kinase OS=Paracoccidioides brasiliensis (strain Pb18) OX=502780 GN=PADG_11072 PE=3 SV=1
C1G5L9	1.63104	0.0526954	1706	0.000103687	0.000169117	Uncharacterized protein OS=Paracoccidioides brasiliensis (strain Pb18) OX=502780 GN=PADG_02474 PE=4 SV=1
C1G8B2	1.63478	0.0984317	2118	8.69128e-05	0.000142083	Uncharacterized protein OS=Paracoccidioides brasiliensis (strain Pb18) OX=502780 GN=PADG_03417 PE=4 SV=1
C1G481	1.64866	0.0339177	1353	7.55588e-05	0.000124571	Uncharacterized protein OS=Paracoccidioides brasiliensis (strain Pb18) OX=502780 GN=PADG_01747 PE=3 SV=1
C1GCU6	1.65379	0.0289925	941	0.000129081	0.000213473	Uncharacterized protein OS=Paracoccidioides brasiliensis (strain Pb18) OX=502780 GN=PADG_04818 PE=4 SV=2
C1GN41	1.65737	0.0208229	447	0.000155182	0.000257194	Serine/threonine-protein phosphatase OS=Paracoccidioides brasiliensis (strain Pb18) OX=502780 GN=PADG_08685 PE=3 SV=1
C1GH99	1.66711	0.0258718	1642	0.000144037	0.000240126	Uncharacterized protein OS=Paracoccidioides brasiliensis (strain Pb18) OX=502780 GN=PADG_06635 PE=4 SV=2
C1GMM2	1.67304	0.0186038	1411	6.36903e-05	0.000106557	Uncharacterized protein OS=Paracoccidioides brasiliensis (strain Pb18) OX=502780 GN=PADG_08508 PE=4 SV=2
C1FZ63	1.68759	0.00950207	114	0.000179561	0.000303024	COP9 signalosome complex subunit 5 OS=Paracoccidioides brasiliensis (strain Pb18) OX=502780 GN=PADG_01089 PE=4 SV=1
C1G4J4	1.68929	0.0504697	1333	0.000100746	0.00017019	Casein kinase II subunit beta OS=Paracoccidioides brasiliensis (strain Pb18) OX=502780 GN=PADG_01860 PE=3 SV=2
C1G5P1	1.70321	0.0404675	1680	0.000119508	0.000203547	NAK protein kinase OS=Paracoccidioides brasiliensis (strain Pb18) OX=502780 GN=PADG_02496 PE=3 SV=1
C1GHW9	1.704	0.0815045	945	8.28371e-05	0.000141154	Dihydroxyacetone kinase OS=Paracoccidioides brasiliensis (strain Pb18) OX=502780 GN=PADG_06855 PE=4 SV=1
C1GAJ4	1.70537	0.0186434	2556	0.000114179	0.000194717	Uncharacterized protein OS=Paracoccidioides brasiliensis (strain Pb18) OX=502780 GN=PADG_04280 PE=4 SV=1
C1GFA1	1.70657	0.0462713	1308	0.000130583	0.000222848	Uncharacterized protein OS=Paracoccidioides brasiliensis (strain Pb18) OX=502780 GN=PADG_05937 PE=4 SV=1
A0A0A0HW80	1.72336	0.023366	2749	0.0001543	0.000265914	Uncharacterized protein OS=Paracoccidioides brasiliensis (strain Pb18) OX=502780 GN=PADG_11487 PE=4 SV=1
C1G031	1.72682	0.0121768	2525	9.23955e-05	0.000159551	Uncharacterized protein OS=Paracoccidioides brasiliensis (strain Pb18) OX=502780 GN=PADG_00221 PE=4 SV=1
C1G1T2	1.73874	0.0659451	2554	0.000112146	0.000194993	Uncharacterized protein OS=Paracoccidioides brasiliensis (strain Pb18) OX=502780 GN=PADG_02098 PE=3 SV=2
C1G260	1.74763	0.135464	915	0.000102086	0.000178409	Uncharacterized protein OS=Paracoccidioides brasiliensis (strain Pb18) OX=502780 GN=PADG_02226 PE=4 SV=1
C1GF64	1.74861	0.0722006	2772	5.11896e-05	8.95106e-05	Transcription elongation factor 1 homolog OS=Paracoccidioides brasiliensis (strain Pb18) OX=502780 GN=PADG_05900 PE=3 SV=2
C1GN30	1.74951	0.0776772	923	0.00010223	0.000178852	Uncharacterized protein OS=Paracoccidioides brasiliensis (strain Pb18) OX=502780 GN=PADG_08674 PE=3 SV=2
C1GDH6	1.75374	0.0232138	2177	0.000126565	0.000221963	Uncharacterized protein OS=Paracoccidioides brasiliensis (strain Pb18) OX=502780 GN=PADG_05312 PE=4 SV=2
C1G5D0	1.75658	0.0198056	1723	0.000116847	0.000205252	Glutamate-cysteine ligase OS=Paracoccidioides brasiliensis (strain Pb18) OX=502780 GN=PADG_03500 PE=4 SV=2
A0A0A0HSS2	1.78961	0.00914252	917	8.94719e-05	0.00016012	Uncharacterized protein OS=Paracoccidioides brasiliensis (strain Pb18) OX=502780 GN=PADG_12264 PE=4 SV=1
C1GEK5	1.80483	0.00922244	1699	0.00011292	0.000203801	Uncharacterized protein OS=Paracoccidioides brasiliensis (strain Pb18) OX=502780 GN=PADG_05691 PE=4 SV=1
C1G8K9	1.80931	0.0110791	907	0.000117763	0.00021307	Uncharacterized protein OS=Paracoccidioides brasiliensis (strain Pb18) OX=502780 GN=PADG_03595 PE=3 SV=2
C1GA83	1.81408	0.054669	981	6.71655e-05	0.000121844	ATP-dependent Clp protease proteolytic subunit OS=Paracoccidioides brasiliensis (strain Pb18) OX=502780 GN=PADG_04169 PE=3 SV=2
C1FYH2	1.82106	0.0511014	2555	0.000113035	0.000205843	Uncharacterized protein OS=Paracoccidioides brasiliensis (strain Pb18) OX=502780 GN=PADG_00848 PE=3 SV=2
C1GDU0	1.82658	0.0141246	2171	0.000102196	0.000186669	Uncharacterized protein OS=Paracoccidioides brasiliensis (strain Pb18) OX=502780 GN=PADG_05426 PE=4 SV=2
C1G8W4	1.86365	0.0213265	1654	0.00016644	0.000310185	E3 ubiquitin-protein ligase OS=Paracoccidioides brasiliensis (strain Pb18) OX=502780 GN=PADG_03700 PE=3 SV=1
C1G3P5	1.86918	0.0621547	2728	7.63743e-05	0.000142757	Mannosyltransferase OS=Paracoccidioides brasiliensis (strain Pb18) OX=502780 GN=PADG_01561 PE=3 SV=2
A0A0A0HYN4	1.95728	0.0119912	512	0.000144817	0.000283447	Uncharacterized protein OS=Paracoccidioides brasiliensis (strain Pb18) OX=502780 GN=PADG_11302 PE=4 SV=1
C1GD00	1.95888	0.02271	920	0.000114128	0.000223562	Uncharacterized protein OS=Paracoccidioides brasiliensis (strain Pb18) OX=502780 GN=PADG_05136 PE=4 SV=1
C1G6S1	1.96334	0.0558723	578	6.78167e-05	0.000133147	Uncharacterized protein OS=Paracoccidioides brasiliensis (strain Pb18) OX=502780 GN=PADG_02876 PE=4 SV=2
C1GA04	1.96676	0.0337579	1746	6.7731e-05	0.000133211	Ribosome biogenesis protein YTM1 OS=Paracoccidioides brasiliensis (strain Pb18) OX=502780 GN=YTM1 PE=3 SV=1
C1G025	1.9842	0.0141122	1632	0.000151604	0.000300811	Uncharacterized protein OS=Paracoccidioides brasiliensis (strain Pb18) OX=502780 GN=PADG_00215 PE=3 SV=2
C1GBB1	2.00224	0.0245273	2519	0.000102281	0.000204791	Peroxiredoxin OS=Paracoccidioides brasiliensis (strain Pb18) OX=502780 GN=PADG_04912 PE=3 SV=2
C1GCP3	2.00822	0.0236951	2109	0.000116295	0.000233545	Uncharacterized protein OS=Paracoccidioides brasiliensis (strain Pb18) OX=502780 GN=PADG_04765 PE=4 SV=2
C1G8U3	2.00881	0.0276165	902	0.00015474	0.000310843	DNA-directed RNA polymerase subunit beta OS=Paracoccidioides brasiliensis (strain Pb18) OX=502780 GN=PADG_03679 PE=3 SV=1
C1G8U5	2.0201	0.00874073	2752	0.000127651	0.000257867	Uncharacterized protein OS=Paracoccidioides brasiliensis (strain Pb18) OX=502780 GN=PADG_03681 PE=4 SV=1
C1GLF5	2.03522	0.0142743	568	0.000122376	0.000249061	Uncharacterized protein OS=Paracoccidioides brasiliensis (strain Pb18) OX=502780 GN=PADG_08091 PE=4 SV=1
A0A0A0HW94	2.07393	0.0122856	1388	7.28366e-05	0.000151058	Uncharacterized protein OS=Paracoccidioides brasiliensis (strain Pb18) OX=502780 GN=PADG_12247 PE=4 SV=1
C1GF48	2.08156	0.0704132	2787	7.74596e-05	0.000161237	Uncharacterized protein OS=Paracoccidioides brasiliensis (strain Pb18) OX=502780 GN=PADG_05884 PE=3 SV=1
C1GDN3	2.09805	0.0459301	2492	8.50061e-05	0.000178347	Cell division control protein 42 OS=Paracoccidioides brasiliensis (strain Pb18) OX=502780 GN=PADG_05369 PE=4 SV=2
C1GAD5	2.10083	0.0134599	1391	7.65975e-05	0.000160919	Uncharacterized protein OS=Paracoccidioides brasiliensis (strain Pb18) OX=502780 GN=PADG_04221 PE=4 SV=2
C1FZI3	2.10344	0.033029	1387	5.07188e-05	0.000106684	Translation machinery-associated protein 22 OS=Paracoccidioides brasiliensis (strain Pb18) OX=502780 GN=PADG_00023 PE=4 SV=1
C1GA87	2.10412	0.0118308	557	7.62377e-05	0.000160413	Uncharacterized protein OS=Paracoccidioides brasiliensis (strain Pb18) OX=502780 GN=PADG_04173 PE=4 SV=1
C1G6F7	2.12008	0.00854158	2952	7.84188e-05	0.000166254	Uncharacterized protein OS=Paracoccidioides brasiliensis (strain Pb18) OX=502780 GN=PADG_02762 PE=4 SV=2
A0A0A0HX32	2.21662	0.0173989	1383	6.36903e-05	0.000141177	Uncharacterized protein OS=Paracoccidioides brasiliensis (strain Pb18) OX=502780 GN=PADG_11955 PE=4 SV=1
A0A0A0HVG0	2.36529	0.00942819	146	9.35396e-05	0.000221248	Folylpolyglutamate synthase OS=Paracoccidioides brasiliensis (strain Pb18) OX=502780 GN=PADG_11535 PE=3 SV=1
C1GA33	2.42938	0.00942715	1296	8.08108e-05	0.00019632	Uncharacterized protein OS=Paracoccidioides brasiliensis (strain Pb18) OX=502780 GN=PADG_04119 PE=4 SV=2
C1GFY3	2.44339	0.0119692	608	5.11896e-05	0.000125076	Uncharacterized protein OS=Paracoccidioides brasiliensis (strain Pb18) OX=502780 GN=PADG_06169 PE=4 SV=2
C1GH62	2.66473	0.0371402	1813	5.03297e-05	0.000134115	Uncharacterized protein OS=Paracoccidioides brasiliensis (strain Pb18) OX=502780 GN=PADG_06598 PE=4 SV=2
C1GCK1	2.69864	0.0101235	2819	8.55684e-05	0.000230918	Uncharacterized protein OS=Paracoccidioides brasiliensis (strain Pb18) OX=502780 GN=PADG_04723 PE=3 SV=2
C1GFL0	2.76012	0.0198903	1355	5.22364e-05	0.000144179	Uncharacterized protein OS=Paracoccidioides brasiliensis (strain Pb18) OX=502780 GN=PADG_06046 PE=3 SV=2

## Sheet: Red
Protein id	Fold Change	pValue	GPI (Index in the sparse matrix)	Signal(Bottom)	Signal(Top)	Description
C1G0F4	-1.33995	0.184689	1685	0.000143348	0.00010698	Uncharacterized protein OS=Paracoccidioides brasiliensis (strain Pb18) OX=502780 GN=PADG_00344 PE=4 SV=2
A0A0A0HR31	-1.31677	0.210568	266	0.000139921	0.000106261	Phosphoribosylaminoimidazole carboxylase, ATPase subunit OS=Paracoccidioides brasiliensis (strain Pb18) OX=502780 GN=PADG_12229 PE=3 SV=1
C1GIQ5	-1.31544	0.254921	606	9.32144e-05	7.08618e-05	Uncharacterized protein OS=Paracoccidioides brasiliensis (strain Pb18) OX=502780 GN=PADG_07141 PE=4 SV=1
C1GCQ8	-1.31174	0.242171	2515	0.000115304	8.79014e-05	Uncharacterized protein OS=Paracoccidioides brasiliensis (strain Pb18) OX=502780 GN=PADG_04780 PE=4 SV=2
C1G798	-1.30524	0.233636	245	0.000103906	7.96068e-05	Pescadillo homolog OS=Paracoccidioides brasiliensis (strain Pb18) OX=502780 GN=NOP7 PE=3 SV=1
C1GL61	-1.29786	0.207448	2595	8.64533e-05	6.66123e-05	Autophagy-related protein OS=Paracoccidioides brasiliensis (strain Pb18) OX=502780 GN=PADG_07847 PE=3 SV=1
C1GCP5	-1.29413	0.124724	1719	0.000184664	0.000142693	Uncharacterized protein OS=Paracoccidioides brasiliensis (strain Pb18) OX=502780 GN=PADG_04767 PE=4 SV=1
C1GAK0	-1.28808	0.0887999	2692	0.000298415	0.000231674	Uncharacterized protein OS=Paracoccidioides brasiliensis (strain Pb18) OX=502780 GN=PADG_04286 PE=4 SV=1
C1GK81	-1.27774	0.0412674	182	0.000317155	0.000248216	Uncharacterized protein OS=Paracoccidioides brasiliensis (strain Pb18) OX=502780 GN=PADG_07667 PE=4 SV=2
C1G4F7	-1.27771	0.125619	2057	0.000204209	0.000159824	Uncharacterized protein OS=Paracoccidioides brasiliensis (strain Pb18) OX=502780 GN=PADG_01823 PE=3 SV=2
A0A0A0HT76	-1.27651	0.256721	2737	0.000136238	0.000106727	Uncharacterized protein OS=Paracoccidioides brasiliensis (strain Pb18) OX=502780 GN=PADG_12371 PE=4 SV=1
C1GM02	-1.2727	0.060501	155	0.000316548	0.000248722	Mitochondrial DNA replication protein YHM2 OS=Paracoccidioides brasiliensis (strain Pb18) OX=502780 GN=PADG_08393 PE=3 SV=1
C1GHP2	-1.27263	0.164036	2559	0.000112492	8.83929e-05	Uncharacterized protein OS=Paracoccidioides brasiliensis (strain Pb18) OX=502780 GN=PADG_06778 PE=4 SV=1
C1GBV3	-1.27224	0.0729563	546	0.000237916	0.000187006	Uncharacterized protein OS=Paracoccidioides brasiliensis (strain Pb18) OX=502780 GN=PADG_04475 PE=4 SV=1
C1GB90	-1.26808	0.242025	2540	0.000225993	0.000178218	Iron-sulfur clusters transporter atm1, mitochondrial OS=Paracoccidioides brasiliensis (strain Pb18) OX=502780 GN=PADG_04891 PE=4 SV=1
C1GBS4	-1.26776	0.307274	2807	8.51121e-05	6.7136e-05	Uncharacterized protein OS=Paracoccidioides brasiliensis (strain Pb18) OX=502780 GN=PADG_05075 PE=3 SV=2
C1FZN1	-1.26741	0.0494217	536	0.000225743	0.000178113	Uncharacterized protein OS=Paracoccidioides brasiliensis (strain Pb18) OX=502780 GN=PADG_00071 PE=4 SV=2
C1GEX3	-1.26715	0.0280592	834	0.000719274	0.000567632	Uncharacterized protein OS=Paracoccidioides brasiliensis (strain Pb18) OX=502780 GN=PADG_05809 PE=4 SV=2; Additional IDs concatenated into MaxParsimony group: C1G7B4
C1GCD3	-1.26489	0.098588	586	0.000224759	0.000177691	Uncharacterized protein OS=Paracoccidioides brasiliensis (strain Pb18) OX=502780 GN=PADG_04655 PE=4 SV=1
C1GEY2	-1.26227	0.113736	2479	0.0002252	0.000178409	Uncharacterized protein OS=Paracoccidioides brasiliensis (strain Pb18) OX=502780 GN=PADG_05818 PE=4 SV=1
C1G487	-1.26217	0.0837921	2698	0.000348345	0.000275988	Vacuolar protein sorting-associated protein OS=Paracoccidioides brasiliensis (strain Pb18) OX=502780 GN=PADG_01753 PE=3 SV=1
C1G815	-1.26101	0.0527327	1264	0.000470995	0.000373506	Uncharacterized protein OS=Paracoccidioides brasiliensis (strain Pb18) OX=502780 GN=PADG_03320 PE=4 SV=2
C1G1S4	-1.26079	0.191916	262	0.000154153	0.000122267	Uncharacterized protein OS=Paracoccidioides brasiliensis (strain Pb18) OX=502780 GN=PADG_02090 PE=4 SV=2
C1G132	-1.26063	0.237911	1425	0.00013531	0.000107335	Uncharacterized protein OS=Paracoccidioides brasiliensis (strain Pb18) OX=502780 GN=PADG_00572 PE=4 SV=1
C1G7M5	-1.26015	0.0433577	2352	0.000380497	0.000301946	Uncharacterized protein OS=Paracoccidioides brasiliensis (strain Pb18) OX=502780 GN=PADG_03180 PE=4 SV=1
C1GN32	-1.25865	0.0378358	188	0.000390868	0.000310545	Uncharacterized protein OS=Paracoccidioides brasiliensis (strain Pb18) OX=502780 GN=PADG_08676 PE=4 SV=2
C1GLI0	-1.25711	0.24739	1760	9.15646e-05	7.28374e-05	Uncharacterized protein OS=Paracoccidioides brasiliensis (strain Pb18) OX=502780 GN=PADG_08116 PE=4 SV=2
C1GLI8	-1.256	0.129281	2769	0.000236281	0.000188121	Uncharacterized protein OS=Paracoccidioides brasiliensis (strain Pb18) OX=502780 GN=PADG_08124 PE=4 SV=2
C1GF89	-1.25478	0.190884	227	0.000134102	0.000106873	Uncharacterized protein OS=Paracoccidioides brasiliensis (strain Pb18) OX=502780 GN=PADG_05925 PE=3 SV=2
A0A0A0HT57	-1.25417	0.033151	164	0.000245238	0.000195539	60S ribosomal protein L37 OS=Paracoccidioides brasiliensis (strain Pb18) OX=502780 GN=PADG_11585 PE=3 SV=1
C1GH81	-1.25079	0.25553	955	6.9446e-05	5.55219e-05	Uncharacterized protein OS=Paracoccidioides brasiliensis (strain Pb18) OX=502780 GN=PADG_06617 PE=4 SV=1
C1GBA0	-1.25042	0.172064	2577	9.23955e-05	7.38916e-05	Uncharacterized protein OS=Paracoccidioides brasiliensis (strain Pb18) OX=502780 GN=PADG_04901 PE=4 SV=1
C1GKV5	-1.2503	0.0642205	1707	0.00012253	9.80007e-05	Uncharacterized protein OS=Paracoccidioides brasiliensis (strain Pb18) OX=502780 GN=PADG_07962 PE=4 SV=1
C1G0A9	-1.24898	0.0576491	2798	0.000144377	0.000115595	Calcium/proton exchanger OS=Paracoccidioides brasiliensis (strain Pb18) OX=502780 GN=PADG_00299 PE=3 SV=1
C1GMM4	-1.24699	0.0655833	1605	0.000431941	0.000346386	Uncharacterized protein OS=Paracoccidioides brasiliensis (strain Pb18) OX=502780 GN=PADG_08510 PE=4 SV=1
C1G0G4	-1.2429	0.0151119	1163	0.000850413	0.000684217	40S ribosomal protein S17 OS=Paracoccidioides brasiliensis (strain Pb18) OX=502780 GN=PADG_00354 PE=3 SV=1
C1GCT4	-1.24134	0.0392778	2103	0.000143233	0.000115386	Uncharacterized protein OS=Paracoccidioides brasiliensis (strain Pb18) OX=502780 GN=PADG_04806 PE=4 SV=1
C1GHZ9	-1.2404	0.23441	2815	8.38331e-05	6.75854e-05	Kinesin-like protein OS=Paracoccidioides brasiliensis (strain Pb18) OX=502780 GN=PADG_06885 PE=3 SV=2
C1GGX4	-1.24032	0.127296	1736	0.000154639	0.000124677	Uncharacterized protein OS=Paracoccidioides brasiliensis (strain Pb18) OX=502780 GN=PADG_06193 PE=4 SV=1
C1GJ94	-1.23975	0.244937	2520	0.000142945	0.000115302	Uncharacterized protein OS=Paracoccidioides brasiliensis (strain Pb18) OX=502780 GN=PADG_07330 PE=4 SV=2
C1FYZ4	-1.23827	0.121039	2096	0.000275763	0.000222701	Uncharacterized protein OS=Paracoccidioides brasiliensis (strain Pb18) OX=502780 GN=PADG_01020 PE=3 SV=1
C1GCY6	-1.23684	0.261535	2565	7.24085e-05	5.8543e-05	Uncharacterized protein OS=Paracoccidioides brasiliensis (strain Pb18) OX=502780 GN=PADG_05122 PE=4 SV=1
C1G6F8	-1.23583	0.0543398	2453	0.000472553	0.000382378	Cyclin-dependent kinases regulatory subunit OS=Paracoccidioides brasiliensis (strain Pb18) OX=502780 GN=PADG_02763 PE=3 SV=2
C1GG82	-1.23498	0.0242818	425	0.000823501	0.000666812	Glutamate decarboxylase OS=Paracoccidioides brasiliensis (strain Pb18) OX=502780 GN=PADG_06319 PE=3 SV=1
C1GA97	-1.23477	0.165973	218	0.000122645	9.93259e-05	60S ribosomal protein L33-A OS=Paracoccidioides brasiliensis (strain Pb18) OX=502780 GN=PADG_04183 PE=4 SV=2
C1G4L2	-1.23213	0.238013	1817	0.000154217	0.000125162	Uncharacterized protein OS=Paracoccidioides brasiliensis (strain Pb18) OX=502780 GN=PADG_01878 PE=4 SV=2
C1G901	-1.23179	0.246019	2544	0.000154639	0.00012554	Uncharacterized protein OS=Paracoccidioides brasiliensis (strain Pb18) OX=502780 GN=PADG_03737 PE=4 SV=1
C1G0Z8	-1.22992	0.0130347	2421	0.000655588	0.000533034	Uncharacterized protein OS=Paracoccidioides brasiliensis (strain Pb18) OX=502780 GN=PADG_00538 PE=4 SV=1
C1GG77	-1.22478	0.0143122	1142	0.00170948	0.00139575	Carboxypeptidase Y homolog A OS=Paracoccidioides brasiliensis (strain Pb18) OX=502780 GN=CPYA PE=3 SV=1
C1G9N1	-1.22463	0.00873457	1836	0.000850194	0.000694248	Uncharacterized protein OS=Paracoccidioides brasiliensis (strain Pb18) OX=502780 GN=PADG_03967 PE=4 SV=1
C1G317	-1.22401	0.268281	2135	7.19169e-05	5.87552e-05	Uncharacterized protein OS=Paracoccidioides brasiliensis (strain Pb18) OX=502780 GN=PADG_01333 PE=4 SV=1
C1G654	-1.22339	0.165669	519	0.000369066	0.000301674	Uncharacterized protein OS=Paracoccidioides brasiliensis (strain Pb18) OX=502780 GN=PADG_02659 PE=4 SV=1
C1GEA1	-1.22314	0.0311792	102	0.000553136	0.000452228	Uncharacterized protein OS=Paracoccidioides brasiliensis (strain Pb18) OX=502780 GN=PADG_05587 PE=4 SV=2
C1GGV1	-1.22293	0.0438842	1294	0.000368797	0.00030157	Uncharacterized protein OS=Paracoccidioides brasiliensis (strain Pb18) OX=502780 GN=PADG_06538 PE=4 SV=2
C1FYF2	-1.222	0.0186183	1635	0.000358989	0.000293772	Uncharacterized protein OS=Paracoccidioides brasiliensis (strain Pb18) OX=502780 GN=PADG_00828 PE=4 SV=1
C1G661	-1.22163	0.080077	2080	0.000206031	0.000168653	Uncharacterized protein OS=Paracoccidioides brasiliensis (strain Pb18) OX=502780 GN=PADG_02666 PE=4 SV=1
C1GMD1	-1.22146	0.157635	2502	0.000162996	0.000133443	Acyl carrier protein OS=Paracoccidioides brasiliensis (strain Pb18) OX=502780 GN=PADG_08217 PE=4 SV=2
C1G3L3	-1.22097	0.218595	1761	0.000151611	0.000124172	Succinate dehydrogenase assembly factor 2, mitochondrial OS=Paracoccidioides brasiliensis (strain Pb18) OX=502780 GN=PADG_01529 PE=3 SV=2
C1GML4	-1.21846	0.198586	2111	0.000174249	0.000143008	Uncharacterized protein OS=Paracoccidioides brasiliensis (strain Pb18) OX=502780 GN=PADG_08500 PE=3 SV=2
C1GKP7	-1.21566	0.162287	1797	0.000121576	0.000100009	Uncharacterized protein OS=Paracoccidioides brasiliensis (strain Pb18) OX=502780 GN=PADG_07904 PE=4 SV=1
C1GBI7	-1.21481	0.0260039	136	0.000430957	0.000354753	NEDD8-activating enzyme E1 regulatory subunit OS=Paracoccidioides brasiliensis (strain Pb18) OX=502780 GN=PADG_04988 PE=3 SV=2
C1GBE7	-1.21426	0.0877402	1708	0.00018396	0.0001515	H/ACA ribonucleoprotein complex subunit OS=Paracoccidioides brasiliensis (strain Pb18) OX=502780 GN=PADG_04948 PE=3 SV=1
C1G7G3	-1.21131	0.0569994	1570	0.00113255	0.000934982	Glucose-6-phosphate 1-epimerase OS=Paracoccidioides brasiliensis (strain Pb18) OX=502780 GN=PADG_03118 PE=3 SV=1
C1G9V7	-1.21114	0.232097	1463	0.000194383	0.000160495	Patatin-like phospholipase domain-containing protein OS=Paracoccidioides brasiliensis (strain Pb18) OX=502780 GN=PADG_04043 PE=3 SV=2
C1GAD2	-1.21015	0.0530165	1325	0.000225616	0.000186437	Uncharacterized protein OS=Paracoccidioides brasiliensis (strain Pb18) OX=502780 GN=PADG_04218 PE=4 SV=1
C1G112	-1.20945	0.0247116	513	0.000429308	0.000354962	Vacuolar protein sorting-associated protein 35 OS=Paracoccidioides brasiliensis (strain Pb18) OX=502780 GN=PADG_00552 PE=3 SV=1
C1G106	-1.20902	0.0997944	92	0.000452669	0.00037441	Uncharacterized protein OS=Paracoccidioides brasiliensis (strain Pb18) OX=502780 GN=PADG_00546 PE=3 SV=1
C1GJ33	-1.20836	0.171655	2464	0.00024736	0.000204707	Uncharacterized protein OS=Paracoccidioides brasiliensis (strain Pb18) OX=502780 GN=PADG_07269 PE=4 SV=1
C1G0E1	-1.20798	0.0364899	69	0.000750674	0.000621427	Uricase OS=Paracoccidioides brasiliensis (strain Pb18) OX=502780 GN=PADG_00331 PE=3 SV=1
C1G501	-1.20783	0.0806359	1586	0.000504676	0.000417837	Calmodulin OS=Paracoccidioides brasiliensis (strain Pb18) OX=502780 GN=PADG_02017 PE=3 SV=2
C1G3I7	-1.20744	0.0367683	2079	0.000225188	0.0001865	Uncharacterized protein OS=Paracoccidioides brasiliensis (strain Pb18) OX=502780 GN=PADG_01503 PE=4 SV=1
C1GFI5	-1.20729	0.0688626	2078	0.000204171	0.000169115	Uncharacterized protein OS=Paracoccidioides brasiliensis (strain Pb18) OX=502780 GN=PADG_06021 PE=4 SV=1
C1G810	-1.2068	0.0129093	11	0.0010935	0.000906119	40S ribosomal protein S4 OS=Paracoccidioides brasiliensis (strain Pb18) OX=502780 GN=PADG_03315 PE=3 SV=1
C1GDS9	-1.2065	0.29111	2133	0.000123131	0.000102056	Uncharacterized protein OS=Paracoccidioides brasiliensis (strain Pb18) OX=502780 GN=PADG_05415 PE=4 SV=1
C1FYX3	-1.206	0.0168456	417	0.000923965	0.00076614	Uncharacterized protein OS=Paracoccidioides brasiliensis (strain Pb18) OX=502780 GN=PADG_00999 PE=4 SV=1
C1FYE6	-1.20499	0.0065101	416	0.000996164	0.000826699	Uncharacterized protein OS=Paracoccidioides brasiliensis (strain Pb18) OX=502780 GN=PADG_00822 PE=4 SV=1
C1GEZ2	-1.2049	0.110131	564	0.0002352	0.000195202	Protein transporter SEC61 subunit alpha OS=Paracoccidioides brasiliensis (strain Pb18) OX=502780 GN=PADG_05828 PE=3 SV=1
C1G0Z9	-1.20419	0.0455962	921	0.000235137	0.000195266	Uncharacterized protein OS=Paracoccidioides brasiliensis (strain Pb18) OX=502780 GN=PADG_00539 PE=3 SV=1
C1G6B9	-1.20412	0.133582	2537	0.000128307	0.000106557	Uncharacterized protein OS=Paracoccidioides brasiliensis (strain Pb18) OX=502780 GN=PADG_02724 PE=4 SV=1
C1GFD1	-1.20299	0.335135	228	0.0001382	0.000114881	Uncharacterized protein OS=Paracoccidioides brasiliensis (strain Pb18) OX=502780 GN=PADG_05967 PE=4 SV=2
C1GII1	-1.2013	0.0205206	1278	0.000256644	0.000213639	Uncharacterized protein OS=Paracoccidioides brasiliensis (strain Pb18) OX=502780 GN=PADG_07067 PE=4 SV=2
C1G3A2	-1.20092	0.187966	1359	0.000127586	0.000106241	Cysteine dioxygenase OS=Paracoccidioides brasiliensis (strain Pb18) OX=502780 GN=PADG_01418 PE=3 SV=2
C1G8V3	-1.20016	0.0157566	2010	0.000491281	0.000409347	Tyrosine--tRNA ligase OS=Paracoccidioides brasiliensis (strain Pb18) OX=502780 GN=PADG_03689 PE=3 SV=2
C1G0P4	-1.19966	0.0105952	2386	0.00142668	0.00118923	Uncharacterized protein OS=Paracoccidioides brasiliensis (strain Pb18) OX=502780 GN=PADG_00434 PE=4 SV=2
C1G632	-1.19878	0.0448718	1188	0.000777542	0.000648609	Uncharacterized protein OS=Paracoccidioides brasiliensis (strain Pb18) OX=502780 GN=PADG_02637 PE=3 SV=1
A0A0A0HUJ5	-1.19753	0.0314218	1447	0.00122416	0.00102224	60S ribosomal protein L3 OS=Paracoccidioides brasiliensis (strain Pb18) OX=502780 GN=PADG_12253 PE=3 SV=1
A0A0A0HVT2	-1.19742	0.0180353	1181	0.000798131	0.000666543	Uncharacterized protein OS=Paracoccidioides brasiliensis (strain Pb18) OX=502780 GN=PADG_11128 PE=3 SV=1
A0A0A0HXV8	-1.19625	0.130892	171	0.000287124	0.00024002	Glycolate oxidase, subunit GlcD OS=Paracoccidioides brasiliensis (strain Pb18) OX=502780 GN=PADG_11733 PE=4 SV=1
C1GFH3	-1.19549	0.00513703	926	0.000286842	0.000239936	Flap endonuclease 1 OS=Paracoccidioides brasiliensis (strain Pb18) OX=502780 GN=FEN1 PE=3 SV=2
C1G5N0	-1.1937	0.107912	2434	0.000499453	0.000418408	CMGC/CK2 protein kinase OS=Paracoccidioides brasiliensis (strain Pb18) OX=502780 GN=PADG_02485 PE=3 SV=1
A0A0A0HWS3	-1.1925	0.0690208	1937	0.000614389	0.000515209	Uncharacterized protein OS=Paracoccidioides brasiliensis (strain Pb18) OX=502780 GN=PADG_11982 PE=3 SV=1
C1G294	-1.19231	0.0134587	396	0.00145172	0.00121757	Succinate--CoA ligase [ADP-forming] subunit alpha, mitochondrial OS=Paracoccidioides brasiliensis (strain Pb18) OX=502780 GN=PADG_02260 PE=3 SV=1
A0A0A0HV09	-1.19215	0.00935028	413	0.0008916	0.000747896	ATP-dependent RNA helicase eIF4A OS=Paracoccidioides brasiliensis (strain Pb18) OX=502780 GN=PADG_11711 PE=3 SV=1
C1G8Z2	-1.19179	0.229381	2089	0.00025529	0.000214208	Uncharacterized protein OS=Paracoccidioides brasiliensis (strain Pb18) OX=502780 GN=PADG_03728 PE=4 SV=2
C1G9A3	-1.19136	0.019272	2892	0.000645127	0.000541506	Uncharacterized protein OS=Paracoccidioides brasiliensis (strain Pb18) OX=502780 GN=PADG_03839 PE=3 SV=1
C1GD63	-1.18956	0.120439	2451	0.000348758	0.000293183	Nuclear cap-binding protein subunit 2 OS=Paracoccidioides brasiliensis (strain Pb18) OX=502780 GN=PADG_05199 PE=3 SV=1
C1GF12	-1.18841	0.0148237	1995	0.00106742	0.000898196	Glycine-tRNA ligase OS=Paracoccidioides brasiliensis (strain Pb18) OX=502780 GN=PADG_05848 PE=4 SV=1
C1G9X6	-1.18719	0.0390493	872	0.000411775	0.00034685	Probable carboxypeptidase PADG_04062 OS=Paracoccidioides brasiliensis (strain Pb18) OX=502780 GN=PADG_04062 PE=3 SV=1
C1GLM5	-1.18579	0.298377	2543	8.73691e-05	7.368e-05	Sphingolipid delta(4)-desaturase OS=Paracoccidioides brasiliensis (strain Pb18) OX=502780 GN=PADG_08266 PE=3 SV=1
C1G014	-1.18566	0.0746471	2045	0.000368875	0.000311114	Sterol 24-C-methyltransferase OS=Paracoccidioides brasiliensis (strain Pb18) OX=502780 GN=PADG_00204 PE=3 SV=1
C1G5J0	-1.18468	0.0568883	830	0.000420945	0.000355322	40S ribosomal protein S15 OS=Paracoccidioides brasiliensis (strain Pb18) OX=502780 GN=PADG_02445 PE=3 SV=1
C1GI12	-1.18292	0.0929368	109	0.000410369	0.000346913	Uncharacterized protein OS=Paracoccidioides brasiliensis (strain Pb18) OX=502780 GN=PADG_06898 PE=4 SV=1
A0A0A0HWM5	-1.18173	0.00450557	1175	0.000893895	0.000756429	Uncharacterized protein OS=Paracoccidioides brasiliensis (strain Pb18) OX=502780 GN=PADG_12105 PE=4 SV=1
C1GJ28	-1.18059	0.0156809	2896	0.000429914	0.000364151	Uncharacterized protein OS=Paracoccidioides brasiliensis (strain Pb18) OX=502780 GN=PADG_07264 PE=4 SV=2
C1G6C1	-1.18041	0.011988	26	0.00138595	0.00117412	Cysteine synthase OS=Paracoccidioides brasiliensis (strain Pb18) OX=502780 GN=PADG_02726 PE=4 SV=1
C1GLX7	-1.1773	0.0174235	1553	0.00108667	0.000923019	Uncharacterized protein OS=Paracoccidioides brasiliensis (strain Pb18) OX=502780 GN=PADG_08368 PE=3 SV=2
C1GDJ9	-1.17646	0.132506	2509	0.000156966	0.000133423	Iron-sulfur cluster assembly protein OS=Paracoccidioides brasiliensis (strain Pb18) OX=502780 GN=PADG_05335 PE=3 SV=2
C1G7J8	-1.17478	0.240533	1434	0.000120513	0.000102583	ULK/ULK protein kinase OS=Paracoccidioides brasiliensis (strain Pb18) OX=502780 GN=PADG_03153 PE=4 SV=2
C1GDV0	-1.17329	0.0639385	442	0.000782541	0.000666962	Cytochrome b-c1 complex subunit Rieske, mitochondrial OS=Paracoccidioides brasiliensis (strain Pb18) OX=502780 GN=PADG_05436 PE=4 SV=1
C1GF68	-1.17125	0.00689256	400	0.0013745	0.00117353	Uncharacterized protein OS=Paracoccidioides brasiliensis (strain Pb18) OX=502780 GN=PADG_05904 PE=4 SV=2
C1GG76	-1.17027	0.017079	79	0.000582808	0.000498013	40S ribosomal protein S18 OS=Paracoccidioides brasiliensis (strain Pb18) OX=502780 GN=PADG_06313 PE=3 SV=2
C1GDK3	-1.16997	0.185305	649	0.000118486	0.000101273	Uncharacterized protein OS=Paracoccidioides brasiliensis (strain Pb18) OX=502780 GN=PADG_05339 PE=3 SV=1
C1G3Y8	-1.16946	0.0522882	457	0.000655791	0.000560765	40S ribosomal protein S6 OS=Paracoccidioides brasiliensis (strain Pb18) OX=502780 GN=PADG_01654 PE=3 SV=1
C1GC81	-1.16807	0.0400758	2430	0.000788826	0.000675326	Spermidine synthase OS=Paracoccidioides brasiliensis (strain Pb18) OX=502780 GN=PADG_04603 PE=3 SV=2
C1G776	-1.16735	0.00419121	1165	0.000945051	0.00080957	Uncharacterized protein OS=Paracoccidioides brasiliensis (strain Pb18) OX=502780 GN=PADG_03031 PE=4 SV=1
C1GLF9	-1.16692	0.0596764	828	0.000674206	0.000577766	26S proteasome regulatory subunit rpn-8 OS=Paracoccidioides brasiliensis (strain Pb18) OX=502780 GN=PADG_08095 PE=4 SV=1
C1G2I3	-1.16681	0.216092	2495	0.000103802	8.89619e-05	Probable cytosolic iron-sulfur protein assembly protein 1 OS=Paracoccidioides brasiliensis (strain Pb18) OX=502780 GN=CIA1 PE=3 SV=1
C1G7F4	-1.16632	0.120669	2072	0.000187069	0.000160393	Uncharacterized protein OS=Paracoccidioides brasiliensis (strain Pb18) OX=502780 GN=PADG_03109 PE=4 SV=1
C1GH64	-1.16528	0.238957	622	0.000175706	0.000150785	Uncharacterized protein OS=Paracoccidioides brasiliensis (strain Pb18) OX=502780 GN=PADG_06600 PE=3 SV=1
C1FZC5	-1.16515	0.202025	1739	0.000134	0.000115006	Uncharacterized protein OS=Paracoccidioides brasiliensis (strain Pb18) OX=502780 GN=PADG_01151 PE=4 SV=2
C1GGV9	-1.16488	0.00191295	15	0.00246456	0.00211572	Aminopeptidase OS=Paracoccidioides brasiliensis (strain Pb18) OX=502780 GN=PADG_06546 PE=3 SV=2
C1G3U9	-1.1644	0.0798774	443	0.000642649	0.000551913	Homocitrate synthase, mitochondrial OS=Paracoccidioides brasiliensis (strain Pb18) OX=502780 GN=PADG_01615 PE=3 SV=2
C1G9Q0	-1.16437	0.282735	1005	0.000102709	8.821e-05	Uncharacterized protein OS=Paracoccidioides brasiliensis (strain Pb18) OX=502780 GN=PADG_03986 PE=4 SV=2
C1G4P7	-1.16423	0.204558	2791	0.000175719	0.000150931	Golgi SNAP receptor complex member 1 OS=Paracoccidioides brasiliensis (strain Pb18) OX=502780 GN=PADG_01913 PE=3 SV=2
C1G6X0	-1.16358	0.231829	1700	0.000143724	0.000123519	Uncharacterized protein OS=Paracoccidioides brasiliensis (strain Pb18) OX=502780 GN=PADG_02925 PE=4 SV=2
C1GHZ2	-1.1635	0.236339	271	0.000114391	9.83171e-05	Uncharacterized protein OS=Paracoccidioides brasiliensis (strain Pb18) OX=502780 GN=PADG_06878 PE=4 SV=2
C1GFQ1	-1.16326	0.21035	1314	0.000165131	0.000141956	Uncharacterized protein OS=Paracoccidioides brasiliensis (strain Pb18) OX=502780 GN=PADG_06087 PE=4 SV=2
C1G7J3	-1.16325	0.366912	723	0.000152828	0.00013138	Pre-mRNA-splicing ATP-dependent RNA helicase PRP28 OS=Paracoccidioides brasiliensis (strain Pb18) OX=502780 GN=PADG_03148 PE=4 SV=2
C1GLA6	-1.16175	0.156754	2727	0.000134	0.000115343	Protein YIP OS=Paracoccidioides brasiliensis (strain Pb18) OX=502780 GN=PADG_07892 PE=3 SV=2
C1G486	-1.16148	0.268492	973	0.000103034	8.87093e-05	Uncharacterized protein OS=Paracoccidioides brasiliensis (strain Pb18) OX=502780 GN=PADG_01752 PE=4 SV=1
C1GHJ6	-1.16135	0.319008	2582	8.23455e-05	7.09048e-05	Uncharacterized protein OS=Paracoccidioides brasiliensis (strain Pb18) OX=502780 GN=PADG_06732 PE=4 SV=2
C1G514	-1.16075	0.00733158	404	0.00124817	0.00107532	Uncharacterized protein OS=Paracoccidioides brasiliensis (strain Pb18) OX=502780 GN=PADG_02030 PE=4 SV=1
C1G6M4	-1.16039	0.308758	716	8.67211e-05	7.47342e-05	Uncharacterized protein OS=Paracoccidioides brasiliensis (strain Pb18) OX=502780 GN=PADG_02829 PE=4 SV=2
C1G9Z1	-1.16035	0.174554	174	0.000319655	0.000275483	Uncharacterized protein OS=Paracoccidioides brasiliensis (strain Pb18) OX=502780 GN=PADG_04077 PE=4 SV=1
C1G2R2	-1.16019	0.183132	1948	0.000701713	0.000604824	Uncharacterized protein OS=Paracoccidioides brasiliensis (strain Pb18) OX=502780 GN=PADG_01228 PE=4 SV=1
C1G7R6	-1.15986	0.00209105	14	0.00187707	0.00161836	Uncharacterized protein OS=Paracoccidioides brasiliensis (strain Pb18) OX=502780 GN=PADG_03221 PE=3 SV=2
C1G7E0	-1.1596	0.00297291	2820	0.00325127	0.0028038	Uncharacterized protein OS=Paracoccidioides brasiliensis (strain Pb18) OX=502780 GN=PADG_03095 PE=4 SV=1
C1GF04	-1.15927	0.323853	643	8.27343e-05	7.13673e-05	CAMKK/CAMKK-META protein kinase OS=Paracoccidioides brasiliensis (strain Pb18) OX=502780 GN=PADG_05840 PE=4 SV=2
C1GD64	-1.15923	0.146239	1315	0.000276944	0.000238905	Uncharacterized protein OS=Paracoccidioides brasiliensis (strain Pb18) OX=502780 GN=PADG_05200 PE=4 SV=1
C1G496	-1.15918	0.00923303	383	0.00230907	0.00199199	Oxoglutarate dehydrogenase (Succinyl-transferring), E1 component OS=Paracoccidioides brasiliensis (strain Pb18) OX=502780 GN=PADG_01762 PE=4 SV=1
C1GMD9	-1.15878	0.243461	960	0.000174626	0.000150699	Uncharacterized protein OS=Paracoccidioides brasiliensis (strain Pb18) OX=502780 GN=PADG_08225 PE=4 SV=2
C1G350	-1.15807	0.0237975	496	0.000483692	0.000417671	Uncharacterized protein OS=Paracoccidioides brasiliensis (strain Pb18) OX=502780 GN=PADG_01366 PE=4 SV=2
C1G1T3	-1.1575	0.168241	997	0.000165581	0.000143051	Uncharacterized protein OS=Paracoccidioides brasiliensis (strain Pb18) OX=502780 GN=PADG_02099 PE=4 SV=2
C1GFG2	-1.15689	0.162127	1395	0.000246331	0.000212924	Uncharacterized protein OS=Paracoccidioides brasiliensis (strain Pb18) OX=502780 GN=PADG_05998 PE=4 SV=2
C1FZK6	-1.15668	0.172472	2448	0.000134	0.000115848	Uncharacterized protein OS=Paracoccidioides brasiliensis (strain Pb18) OX=502780 GN=PADG_00046 PE=4 SV=1
C1GE04	-1.15661	0.0266562	2893	0.0007198	0.000622333	Uncharacterized protein OS=Paracoccidioides brasiliensis (strain Pb18) OX=502780 GN=PADG_05490 PE=4 SV=1
C1G3Q7	-1.15656	0.262287	2124	0.000102281	8.8436e-05	Uncharacterized protein OS=Paracoccidioides brasiliensis (strain Pb18) OX=502780 GN=PADG_01573 PE=4 SV=2
C1GE93	-1.15644	0.00377884	691	5.13333e-05	4.4389e-05	Uncharacterized protein OS=Paracoccidioides brasiliensis (strain Pb18) OX=502780 GN=PADG_05579 PE=3 SV=1
C1G391	-1.15559	0.0258853	27	0.00136557	0.00118171	40S ribosomal protein OS=Paracoccidioides brasiliensis (strain Pb18) OX=502780 GN=PADG_01407 PE=3 SV=1
C1G0S1	-1.15524	0.21525	2580	0.000102773	8.89619e-05	Protein YOP1 OS=Paracoccidioides brasiliensis (strain Pb18) OX=502780 GN=PADG_00461 PE=3 SV=1
C1GA21	-1.15476	0.0538357	1620	0.000338338	0.000292993	Uncharacterized protein OS=Paracoccidioides brasiliensis (strain Pb18) OX=502780 GN=PADG_04107 PE=4 SV=2
C1GBH2	-1.15443	0.0204185	2699	0.000246267	0.000213323	Uncharacterized protein OS=Paracoccidioides brasiliensis (strain Pb18) OX=502780 GN=PADG_04973 PE=4 SV=1
C1G1N8	-1.15432	0.012206	1457	0.00116817	0.001012	Uncharacterized protein OS=Paracoccidioides brasiliensis (strain Pb18) OX=502780 GN=PADG_00778 PE=3 SV=1
C1GHD0	-1.154	0.21986	572	0.000133347	0.000115552	Uncharacterized protein OS=Paracoccidioides brasiliensis (strain Pb18) OX=502780 GN=PADG_06666 PE=4 SV=1
C1G277	-1.15387	0.0039311	1015	5.11491e-05	4.43283e-05	Uncharacterized protein OS=Paracoccidioides brasiliensis (strain Pb18) OX=502780 GN=PADG_02243 PE=4 SV=2
C1G1H4	-1.15371	0.00171181	2878	0.00142516	0.00123529	Pyruvate decarboxylase OS=Paracoccidioides brasiliensis (strain Pb18) OX=502780 GN=PADG_00714 PE=3 SV=1
C1G722	-1.15367	0.175313	2344	0.000225564	0.000195519	Uncharacterized protein OS=Paracoccidioides brasiliensis (strain Pb18) OX=502780 GN=PADG_02977 PE=4 SV=1
C1GBF6	-1.15354	0.00141814	1045	5.07188e-05	4.3968e-05	Uncharacterized protein OS=Paracoccidioides brasiliensis (strain Pb18) OX=502780 GN=PADG_04957 PE=4 SV=2
C1G4S5	-1.15341	0.162819	2548	0.000113035	9.80007e-05	Uncharacterized protein OS=Paracoccidioides brasiliensis (strain Pb18) OX=502780 GN=PADG_01941 PE=4 SV=1
C1G7N7	-1.15311	0.00355464	2882	0.000954661	0.000827903	Proteasome endopeptidase complex OS=Paracoccidioides brasiliensis (strain Pb18) OX=502780 GN=PADG_03192 PE=3 SV=2
C1G5P6	-1.15252	0.0145302	1573	0.000880565	0.000764034	Uncharacterized protein OS=Paracoccidioides brasiliensis (strain Pb18) OX=502780 GN=PADG_02501 PE=4 SV=1
C1GEQ4	-1.15248	0.141648	2486	0.000132907	0.000115322	Uncharacterized protein OS=Paracoccidioides brasiliensis (strain Pb18) OX=502780 GN=PADG_05740 PE=4 SV=1
C1GID3	-1.15238	0.227712	263	0.000132919	0.000115343	Uncharacterized protein OS=Paracoccidioides brasiliensis (strain Pb18) OX=502780 GN=PADG_07019 PE=4 SV=2
C1GDA8	-1.1523	0.278599	2625	0.000120393	0.00010448	60S ribosomal protein L44 OS=Paracoccidioides brasiliensis (strain Pb18) OX=502780 GN=PADG_05244 PE=3 SV=2
C1GG42	-1.15204	0.185525	2093	0.000143609	0.000124657	Uncharacterized protein OS=Paracoccidioides brasiliensis (strain Pb18) OX=502780 GN=PADG_06279 PE=3 SV=2
C1GKU6	-1.15172	0.0623092	1569	0.000726628	0.000630908	Peptidyl-prolyl cis-trans isomerase OS=Paracoccidioides brasiliensis (strain Pb18) OX=502780 GN=PADG_07953 PE=3 SV=2; Additional IDs concatenated into MaxParsimony group: C1GI23
A0A0A0HYV6	-1.15136	0.0293102	767	0.00132093	0.00114728	60S ribosomal protein L5 OS=Paracoccidioides brasiliensis (strain Pb18) OX=502780 GN=PADG_11379 PE=3 SV=1
C1G7Y7	-1.15132	0.289411	288	9.19675e-05	7.98801e-05	Uncharacterized protein OS=Paracoccidioides brasiliensis (strain Pb18) OX=502780 GN=PADG_03292 PE=4 SV=2
C1GE65	-1.15125	0.326573	561	0.000154377	0.000134096	Uncharacterized protein OS=Paracoccidioides brasiliensis (strain Pb18) OX=502780 GN=PADG_05551 PE=4 SV=1
C1GJC0	-1.15097	0.16062	1017	0.000122593	0.000106513	Woronin body major protein OS=Paracoccidioides brasiliensis (strain Pb18) OX=502780 GN=PADG_07356 PE=4 SV=2
C1G2Z8	-1.15053	0.120973	1157	0.000686195	0.000596415	Pyridoxal phosphate homeostasis protein OS=Paracoccidioides brasiliensis (strain Pb18) OX=502780 GN=PADG_01314 PE=3 SV=1
C1G538	-1.14991	0.00159039	2627	5.11491e-05	4.4481e-05	Uncharacterized protein OS=Paracoccidioides brasiliensis (strain Pb18) OX=502780 GN=PADG_02054 PE=4 SV=2
C1G2U9	-1.1492	0.136457	128	0.000449525	0.000391165	Uncharacterized protein OS=Paracoccidioides brasiliensis (strain Pb18) OX=502780 GN=PADG_01265 PE=4 SV=1
C1G7Q9	-1.14867	0.159954	1638	0.000317046	0.000276011	Small nuclear ribonucleoprotein E OS=Paracoccidioides brasiliensis (strain Pb18) OX=502780 GN=PADG_03214 PE=3 SV=1
A0A0A0HVI1	-1.14863	0.336938	2144	8.62818e-05	7.51173e-05	Uncharacterized protein OS=Paracoccidioides brasiliensis (strain Pb18) OX=502780 GN=PADG_11843 PE=4 SV=1
C1GGP4	-1.14858	0.263576	1780	0.00010189	8.871e-05	Uncharacterized protein OS=Paracoccidioides brasiliensis (strain Pb18) OX=502780 GN=PADG_06481 PE=4 SV=1
A0A0A0HU75	-1.14725	0.160946	226	0.000132907	0.000115848	Uncharacterized protein OS=Paracoccidioides brasiliensis (strain Pb18) OX=502780 GN=PADG_11705 PE=4 SV=1
A0A0A0HYS7	-1.14696	0.12187	1678	0.000275487	0.000240189	Uncharacterized protein OS=Paracoccidioides brasiliensis (strain Pb18) OX=502780 GN=PADG_11347 PE=4 SV=1
C1G2Q2	-1.14688	0.271526	1036	0.000102005	8.89416e-05	Uncharacterized protein OS=Paracoccidioides brasiliensis (strain Pb18) OX=502780 GN=PADG_01218 PE=4 SV=1
C1G8W0	-1.14664	0.276969	2358	0.000203941	0.00017786	Uncharacterized protein OS=Paracoccidioides brasiliensis (strain Pb18) OX=502780 GN=PADG_03696 PE=4 SV=2
C1G4Q3	-1.1459	0.295076	1787	0.000122466	0.000106873	Uncharacterized protein OS=Paracoccidioides brasiliensis (strain Pb18) OX=502780 GN=PADG_01919 PE=4 SV=2
C1GJF9	-1.14537	0.00487848	295	5.10431e-05	4.45647e-05	Uncharacterized protein OS=Paracoccidioides brasiliensis (strain Pb18) OX=502780 GN=PADG_07395 PE=4 SV=2
C1G7S0	-1.14489	0.327482	2123	8.20698e-05	7.16834e-05	Acyl-CoA desaturase OS=Paracoccidioides brasiliensis (strain Pb18) OX=502780 GN=PADG_03225 PE=3 SV=1
C1GJX9	-1.14482	0.35485	968	8.14631e-05	7.11578e-05	Uncharacterized protein OS=Paracoccidioides brasiliensis (strain Pb18) OX=502780 GN=PADG_07565 PE=4 SV=2
A0A0A0HUZ5	-1.14337	0.0100229	1424	5.12348e-05	4.48105e-05	ATP-dependent RNA helicase DBP2 OS=Paracoccidioides brasiliensis (strain Pb18) OX=502780 GN=PADG_11253 PE=4 SV=1
C1GLB5	-1.14331	0.213147	1932	0.00030605	0.000267687	DNA helicase OS=Paracoccidioides brasiliensis (strain Pb18) OX=502780 GN=PADG_07901 PE=3 SV=2
C1GBD3	-1.14229	0.0117023	2838	0.00122926	0.00107614	Uncharacterized protein OS=Paracoccidioides brasiliensis (strain Pb18) OX=502780 GN=PADG_04934 PE=4 SV=2
C1GDQ7	-1.14122	0.0227058	430	0.000872027	0.00076412	Uncharacterized protein OS=Paracoccidioides brasiliensis (strain Pb18) OX=502780 GN=PADG_05393 PE=4 SV=1
C1GGN1	-1.14053	0.370473	1362	6.7731e-05	5.93856e-05	Uncharacterized protein OS=Paracoccidioides brasiliensis (strain Pb18) OX=502780 GN=PADG_06468 PE=4 SV=2
C1FYJ7	-1.13992	0.285586	562	0.000172554	0.000151374	Histone H3 OS=Paracoccidioides brasiliensis (strain Pb18) OX=502780 GN=PADG_00873 PE=3 SV=1
C1G0R7	-1.13791	0.109384	1965	0.000646708	0.000568329	Uncharacterized protein OS=Paracoccidioides brasiliensis (strain Pb18) OX=502780 GN=PADG_00457 PE=4 SV=2
C1GBT0	-1.13553	0.00999751	1137	0.00221909	0.00195423	Aldehyde dehydrogenase OS=Paracoccidioides brasiliensis (strain Pb18) OX=502780 GN=PADG_05081 PE=3 SV=2
C1GG15	-1.1344	0.0374735	2859	0.00071723	0.000632257	1,2-dihydroxy-3-keto-5-methylthiopentene dioxygenase OS=Paracoccidioides brasiliensis (strain Pb18) OX=502780 GN=ADI1 PE=3 SV=1
C1G6F6	-1.13401	0.0272458	780	0.00184448	0.00162652	Hsp75-like protein OS=Paracoccidioides brasiliensis (strain Pb18) OX=502780 GN=PADG_02761 PE=3 SV=1
C1FYM2	-1.13386	0.199079	1216	0.00059564	0.00052532	Uncharacterized protein OS=Paracoccidioides brasiliensis (strain Pb18) OX=502780 GN=PADG_00898 PE=4 SV=2
C1G049	-1.13344	0.213197	1765	0.000130711	0.000115322	Uncharacterized protein OS=Paracoccidioides brasiliensis (strain Pb18) OX=502780 GN=PADG_00239 PE=4 SV=2
C1GER4	-1.13276	0.0774295	467	0.000553652	0.000488765	Uncharacterized protein OS=Paracoccidioides brasiliensis (strain Pb18) OX=502780 GN=PADG_05750 PE=4 SV=2
C1G7Q4	-1.13233	0.12003	2302	0.000603787	0.000533226	Uncharacterized protein OS=Paracoccidioides brasiliensis (strain Pb18) OX=502780 GN=PADG_03209 PE=4 SV=1
C1GBY8	-1.13203	0.213012	1290	0.000501914	0.000443377	Ribonucleoside-diphosphate reductase OS=Paracoccidioides brasiliensis (strain Pb18) OX=502780 GN=PADG_04510 PE=3 SV=2
C1GM71	-1.13178	0.310176	2706	0.00013829	0.000122188	Uncharacterized protein OS=Paracoccidioides brasiliensis (strain Pb18) OX=502780 GN=PADG_08157 PE=4 SV=2
C1GMJ4	-1.13008	0.133869	1230	0.000430452	0.000380904	Uncharacterized protein OS=Paracoccidioides brasiliensis (strain Pb18) OX=502780 GN=PADG_08480 PE=4 SV=1
C1GKU3	-1.12991	0.101749	802	0.00099464	0.000880285	Phosphotransferase OS=Paracoccidioides brasiliensis (strain Pb18) OX=502780 GN=PADG_07950 PE=3 SV=1
C1GC92	-1.12987	0.164531	56	0.000613472	0.000542958	Prohibitin-1 OS=Paracoccidioides brasiliensis (strain Pb18) OX=502780 GN=PADG_04614 PE=4 SV=1
C1G764	-1.12803	0.194759	2027	0.00040136	0.000355807	Vacuolar protein sorting-associated protein 29 OS=Paracoccidioides brasiliensis (strain Pb18) OX=502780 GN=PADG_03019 PE=3 SV=2
C1GC48	-1.12795	0.0276539	1180	0.000851715	0.000755102	Branched-chain-amino-acid aminotransferase OS=Paracoccidioides brasiliensis (strain Pb18) OX=502780 GN=PADG_04570 PE=3 SV=2
C1GA89	-1.12719	0.0554387	2382	0.00126254	0.00112007	Inorganic pyrophosphatase OS=Paracoccidioides brasiliensis (strain Pb18) OX=502780 GN=PADG_04175 PE=4 SV=2
C1GIJ5	-1.12707	0.0548923	1159	0.00087264	0.000774254	Uncharacterized protein OS=Paracoccidioides brasiliensis (strain Pb18) OX=502780 GN=PADG_07081 PE=4 SV=1
C1GD89	-1.124	0.105168	1614	0.000470101	0.00041824	Orotidine 5'-phosphate decarboxylase OS=Paracoccidioides brasiliensis (strain Pb18) OX=502780 GN=PADG_05225 PE=3 SV=1
C1GBF1	-1.12244	0.131325	822	0.00079001	0.000703835	Uncharacterized protein OS=Paracoccidioides brasiliensis (strain Pb18) OX=502780 GN=PADG_04952 PE=3 SV=1
C1GK76	-1.12217	0.274055	2462	0.000329168	0.000293331	Precorrin 3B synthase CobZ OS=Paracoccidioides brasiliensis (strain Pb18) OX=502780 GN=PADG_07662 PE=4 SV=2
C1FZZ8	-1.12044	0.294917	1747	0.000139671	0.000124657	Uncharacterized protein OS=Paracoccidioides brasiliensis (strain Pb18) OX=502780 GN=PADG_00188 PE=4 SV=1
C1G3M9	-1.12008	0.270833	575	8.94719e-05	7.98801e-05	Golgi apparatus membrane protein TVP23 OS=Paracoccidioides brasiliensis (strain Pb18) OX=502780 GN=PADG_01545 PE=3 SV=1
C1FZC6	-1.11972	0.23725	2480	0.000326868	0.000291919	Actin cytoskeleton-regulatory complex protein PAN1 OS=Paracoccidioides brasiliensis (strain Pb18) OX=502780 GN=PADG_01152 PE=4 SV=1
C1GCK8	-1.11764	0.0539746	63	0.000656119	0.000587059	Nascent polypeptide-associated complex subunit alpha OS=Paracoccidioides brasiliensis (strain Pb18) OX=502780 GN=PADG_04730 PE=4 SV=1
C1GII4	-1.11689	0.279671	1628	0.00035654	0.000319227	Uncharacterized protein OS=Paracoccidioides brasiliensis (strain Pb18) OX=502780 GN=PADG_07070 PE=3 SV=1
C1G0B0	-1.11564	0.191347	811	0.000574974	0.000515378	26S protease regulatory subunit 8 OS=Paracoccidioides brasiliensis (strain Pb18) OX=502780 GN=PADG_00300 PE=3 SV=2
C1G554	-1.1151	0.0339577	1968	0.00332435	0.00298121	Uncharacterized protein OS=Paracoccidioides brasiliensis (strain Pb18) OX=502780 GN=PADG_03424 PE=3 SV=2
C1GA17	-1.11426	0.00545259	9	0.00349761	0.00313896	Pyruvate carboxylase OS=Paracoccidioides brasiliensis (strain Pb18) OX=502780 GN=PADG_04103 PE=4 SV=1
C1FYL2	-1.11416	0.0127617	782	0.00155563	0.00139623	Argininosuccinate synthase OS=Paracoccidioides brasiliensis (strain Pb18) OX=502780 GN=PADG_00888 PE=3 SV=2
C1G9D7	-1.11414	0.0297069	441	0.000634137	0.000569171	60S ribosomal protein L20 OS=Paracoccidioides brasiliensis (strain Pb18) OX=502780 GN=PADG_03873 PE=3 SV=2
C1GM08	-1.11379	0.173183	1213	0.000524574	0.000470981	Uncharacterized protein OS=Paracoccidioides brasiliensis (strain Pb18) OX=502780 GN=PADG_08399 PE=4 SV=1
C1GDA3	-1.11267	0.0566046	2933	0.00026697	0.000239936	Tubulin-specific chaperone A OS=Paracoccidioides brasiliensis (strain Pb18) OX=502780 GN=PADG_05239 PE=3 SV=1
C1G9M3	-1.11199	0.0932368	1172	0.000900285	0.000809614	Actin-related protein 2/3 complex subunit OS=Paracoccidioides brasiliensis (strain Pb18) OX=502780 GN=PADG_03959 PE=3 SV=2
C1GA79	-1.11192	0.0779889	1191	0.000861024	0.000774359	Uncharacterized protein OS=Paracoccidioides brasiliensis (strain Pb18) OX=502780 GN=PADG_04165 PE=4 SV=2
C1GFL5	-1.11153	0.088806	814	0.000759901	0.000683651	Uncharacterized protein OS=Paracoccidioides brasiliensis (strain Pb18) OX=502780 GN=PADG_06051 PE=4 SV=2
C1G553	-1.11134	0.096075	110	0.000592642	0.000533266	Uncharacterized protein OS=Paracoccidioides brasiliensis (strain Pb18) OX=502780 GN=PADG_03423 PE=4 SV=2
C1GLF1	-1.11059	0.0547564	2440	0.000533339	0.000480232	Proteasome subunit beta OS=Paracoccidioides brasiliensis (strain Pb18) OX=502780 GN=PADG_08087 PE=3 SV=2
C1G857	-1.11016	0.329194	243	0.000226346	0.000203886	Uncharacterized protein OS=Paracoccidioides brasiliensis (strain Pb18) OX=502780 GN=PADG_03362 PE=4 SV=1
C1FZ57	-1.10997	0.251957	2039	0.00028564	0.000257342	60S ribosomal protein L32 OS=Paracoccidioides brasiliensis (strain Pb18) OX=502780 GN=PADG_01083 PE=4 SV=2
C1GGE5	-1.10991	0.0427739	1452	0.00105775	0.000952999	Uncharacterized protein OS=Paracoccidioides brasiliensis (strain Pb18) OX=502780 GN=PADG_06382 PE=3 SV=1
C1GCI0	-1.1089	0.00176298	783	0.00154784	0.00139583	Malate synthase OS=Paracoccidioides brasiliensis (strain Pb18) OX=502780 GN=PADG_04702 PE=3 SV=2
C1GD48	-1.10786	0.216681	1299	0.000256153	0.000231213	Uncharacterized protein OS=Paracoccidioides brasiliensis (strain Pb18) OX=502780 GN=PADG_05184 PE=4 SV=2
C1G0R9	-1.10707	0.213386	900	0.000255992	0.000231234	Uncharacterized protein OS=Paracoccidioides brasiliensis (strain Pb18) OX=502780 GN=PADG_00459 PE=4 SV=1
C1GD94	-1.10693	0.0431984	1566	0.000933708	0.000843515	Uncharacterized protein OS=Paracoccidioides brasiliensis (strain Pb18) OX=502780 GN=PADG_05230 PE=4 SV=1
C1G9B6	-1.10651	0.270815	1659	0.000275588	0.000249061	Uncharacterized protein OS=Paracoccidioides brasiliensis (strain Pb18) OX=502780 GN=PADG_03852 PE=4 SV=1
A0A0A0HWA2	-1.1051	0.266178	2736	0.000215693	0.000195179	Uncharacterized protein OS=Paracoccidioides brasiliensis (strain Pb18) OX=502780 GN=PADG_12252 PE=4 SV=1
C1FYP5	-1.10467	0.241023	2362	0.000255437	0.000231234	Uncharacterized protein OS=Paracoccidioides brasiliensis (strain Pb18) OX=502780 GN=PADG_00921 PE=4 SV=2
C1GJS3	-1.10453	0.28613	2506	0.000226171	0.000204767	Uncharacterized protein OS=Paracoccidioides brasiliensis (strain Pb18) OX=502780 GN=PADG_07509 PE=4 SV=1
C1GMY8	-1.10425	0.148456	940	0.000225303	0.000204031	Leucine aminopeptidase 1 OS=Paracoccidioides brasiliensis (strain Pb18) OX=502780 GN=LAP1 PE=3 SV=1
C1G4Y3	-1.10349	0.20758	1694	0.000226332	0.000205106	Small nuclear ribonucleoprotein Sm D3 OS=Paracoccidioides brasiliensis (strain Pb18) OX=502780 GN=PADG_01999 PE=3 SV=1
C1G8U4	-1.1027	0.041249	840	0.000441372	0.000400265	Proteasome subunit beta OS=Paracoccidioides brasiliensis (strain Pb18) OX=502780 GN=PADG_03680 PE=3 SV=1
C1G0L2	-1.10223	0.233484	2021	0.000440394	0.000399548	Uncharacterized protein OS=Paracoccidioides brasiliensis (strain Pb18) OX=502780 GN=PADG_00402 PE=3 SV=1
C1G7B2	-1.10197	0.0963608	2332	0.000401513	0.000364361	Peptide hydrolase OS=Paracoccidioides brasiliensis (strain Pb18) OX=502780 GN=PADG_03067 PE=3 SV=1
C1G7K6	-1.10189	0.110049	2911	0.000607429	0.00055126	Thioredoxin OS=Paracoccidioides brasiliensis (strain Pb18) OX=502780 GN=PADG_03161 PE=4 SV=1
C1G953	-1.10187	0.188215	1192	0.000636675	0.000577811	Prohibitin-2 OS=Paracoccidioides brasiliensis (strain Pb18) OX=502780 GN=PADG_03789 PE=4 SV=1
C1GEU7	-1.10177	0.044248	2883	0.000850756	0.000772171	Uncharacterized protein OS=Paracoccidioides brasiliensis (strain Pb18) OX=502780 GN=PADG_05783 PE=3 SV=1
C1G2A4	-1.10165	0.228157	613	0.000195153	0.000177145	Sodium/hydrogen exchanger OS=Paracoccidioides brasiliensis (strain Pb18) OX=502780 GN=PADG_02270 PE=3 SV=2
C1FYS5	-1.1016	0.0393196	435	0.000626649	0.000568854	Uncharacterized protein OS=Paracoccidioides brasiliensis (strain Pb18) OX=502780 GN=PADG_00951 PE=4 SV=2
C1GEL7	-1.10145	0.234738	137	0.000430592	0.000390931	Uncharacterized protein OS=Paracoccidioides brasiliensis (strain Pb18) OX=502780 GN=PADG_05703 PE=4 SV=2
C1G7B8	-1.10071	0.123511	1177	0.000636747	0.000578485	Nuclear movement protein nudC OS=Paracoccidioides brasiliensis (strain Pb18) OX=502780 GN=PADG_03073 PE=4 SV=1
C1G6D9	-1.10064	0.276421	191	0.000194625	0.000176829	Secondary thiamine-phosphate synthase enzyme OS=Paracoccidioides brasiliensis (strain Pb18) OX=502780 GN=PADG_02744 PE=4 SV=2
C1FZD4	-1.10002	0.230314	98	0.000576522	0.0005241	Eukaryotic translation initiation factor 3 subunit M OS=Paracoccidioides brasiliensis (strain Pb18) OX=502780 GN=PADG_01160 PE=3 SV=1
C1GB00	-1.09994	0.34693	2745	0.000186133	0.000169222	Uncharacterized protein OS=Paracoccidioides brasiliensis (strain Pb18) OX=502780 GN=PADG_04436 PE=4 SV=1
C1FZ10	-1.09937	0.226648	2731	0.000205264	0.00018671	Uncharacterized protein OS=Paracoccidioides brasiliensis (strain Pb18) OX=502780 GN=PADG_01036 PE=4 SV=1
C1GK99	-1.09859	0.153908	857	0.000390331	0.000355301	40S ribosomal protein OS=Paracoccidioides brasiliensis (strain Pb18) OX=502780 GN=PADG_07685 PE=3 SV=1
C1G8Q1	-1.09855	0.257947	2075	0.00021481	0.000195539	CMGC/CDK/CDC2 protein kinase OS=Paracoccidioides brasiliensis (strain Pb18) OX=502780 GN=PADG_03637 PE=3 SV=1
C1GEF0	-1.09843	0.37793	1352	0.000127021	0.000115638	Uncharacterized protein OS=Paracoccidioides brasiliensis (strain Pb18) OX=502780 GN=PADG_05636 PE=4 SV=1
C1G5S0	-1.09803	0.167556	631	0.000205315	0.000186985	Uncharacterized protein OS=Paracoccidioides brasiliensis (strain Pb18) OX=502780 GN=PADG_02525 PE=4 SV=1
A0A0A0HTA9	-1.09796	0.0806299	1949	0.000624188	0.000568499	Cytochrome c1, heme protein, mitochondrial OS=Paracoccidioides brasiliensis (strain Pb18) OX=502780 GN=PADG_12401 PE=4 SV=1
C1FZV1	-1.09783	0.367176	554	0.00020456	0.000186332	Ribulose-phosphate 3-epimerase OS=Paracoccidioides brasiliensis (strain Pb18) OX=502780 GN=PADG_00141 PE=3 SV=1
C1G1F4	-1.09754	0.182633	2066	0.00018538	0.000168906	Uncharacterized protein OS=Paracoccidioides brasiliensis (strain Pb18) OX=502780 GN=PADG_00694 PE=4 SV=1
C1GMC5	-1.09715	0.117804	2410	0.000820046	0.000747431	Uncharacterized protein OS=Paracoccidioides brasiliensis (strain Pb18) OX=502780 GN=PADG_08211 PE=3 SV=1
C1GG56	-1.09662	0.364168	2533	8.19548e-05	7.47342e-05	Uncharacterized protein OS=Paracoccidioides brasiliensis (strain Pb18) OX=502780 GN=PADG_06293 PE=4 SV=1
C1GL13	-1.09626	0.344203	590	0.000185489	0.000169202	Uncharacterized protein OS=Paracoccidioides brasiliensis (strain Pb18) OX=502780 GN=PADG_08020 PE=4 SV=2
C1GK44	-1.09585	0.138997	2409	0.000760533	0.000694014	Uncharacterized protein OS=Paracoccidioides brasiliensis (strain Pb18) OX=502780 GN=PADG_07630 PE=4 SV=2
C1G7F1	-1.09564	0.115122	2449	0.00041941	0.000382798	Dolichyl-diphosphooligosaccharide--protein glycosyltransferase subunit 2 OS=Paracoccidioides brasiliensis (strain Pb18) OX=502780 GN=PADG_03106 PE=3 SV=1
C1G3Z9	-1.09511	0.0791467	68	0.000769945	0.000703076	Uncharacterized protein OS=Paracoccidioides brasiliensis (strain Pb18) OX=502780 GN=PADG_01665 PE=4 SV=2
C1GKT9	-1.09396	0.114739	47	0.000739583	0.000676062	Peroxiredoxin OS=Paracoccidioides brasiliensis (strain Pb18) OX=502780 GN=PADG_07946 PE=3 SV=1
C1G1C3	-1.0937	0.211762	2841	0.000544472	0.000497824	Homoserine dehydrogenase OS=Paracoccidioides brasiliensis (strain Pb18) OX=502780 GN=PADG_00663 PE=3 SV=1
C1GI99	-1.09346	0.381734	2596	0.000135548	0.000123962	Uncharacterized protein OS=Paracoccidioides brasiliensis (strain Pb18) OX=502780 GN=PADG_06985 PE=4 SV=1
C1G1X9	-1.09279	0.0579643	387	0.00381999	0.00349562	Alpha-1,4 glucan phosphorylase OS=Paracoccidioides brasiliensis (strain Pb18) OX=502780 GN=PADG_02145 PE=3 SV=2
C1G6M8	-1.09253	0.133642	1446	0.000777407	0.000711566	ADP-ribosylation factor OS=Paracoccidioides brasiliensis (strain Pb18) OX=502780 GN=PADG_02833 PE=3 SV=1
C1G6S0	-1.09002	0.093577	1939	0.000757159	0.000694627	Coatomer subunit beta OS=Paracoccidioides brasiliensis (strain Pb18) OX=502780 GN=PADG_02875 PE=4 SV=1
C1GJI0	-1.08996	0.123686	38	0.00120954	0.00110971	Uncharacterized protein OS=Paracoccidioides brasiliensis (strain Pb18) OX=502780 GN=PADG_07416 PE=4 SV=2
A0A0A0HUF3	-1.08863	0.341428	2478	0.000144492	0.000132728	U6 snRNA-associated Sm-like protein LSm3 OS=Paracoccidioides brasiliensis (strain Pb18) OX=502780 GN=LSM3 PE=3 SV=1
C1GJ13	-1.08801	0.110669	1547	0.00139215	0.00127954	Coronin OS=Paracoccidioides brasiliensis (strain Pb18) OX=502780 GN=PADG_07249 PE=3 SV=1
C1GL50	-1.08741	0.131472	2916	0.000483142	0.000444304	Uncharacterized protein OS=Paracoccidioides brasiliensis (strain Pb18) OX=502780 GN=PADG_07836 PE=4 SV=2
C1G8R5	-1.08704	0.111326	2384	0.001478	0.00135965	6-phosphogluconate dehydrogenase, decarboxylating OS=Paracoccidioides brasiliensis (strain Pb18) OX=502780 GN=PADG_03651 PE=3 SV=2
C1G8Y3	-1.08586	0.395149	2518	0.000144601	0.000133168	Uncharacterized protein OS=Paracoccidioides brasiliensis (strain Pb18) OX=502780 GN=PADG_03719 PE=4 SV=1
C1GK43	-1.08573	0.261815	891	0.000337194	0.000310568	Uncharacterized protein OS=Paracoccidioides brasiliensis (strain Pb18) OX=502780 GN=PADG_07629 PE=4 SV=2
C1GGJ2	-1.08518	0.102799	1453	0.00331076	0.00305088	Ketol-acid reductoisomerase, mitochondrial OS=Paracoccidioides brasiliensis (strain Pb18) OX=502780 GN=PADG_06429 PE=3 SV=1
C1G9A8	-1.08502	0.343316	2028	0.000317769	0.000292868	Uncharacterized protein OS=Paracoccidioides brasiliensis (strain Pb18) OX=502780 GN=PADG_03844 PE=4 SV=1
A0A0A0HUW9	-1.08467	0.0868447	896	0.00031835	0.000293499	Uncharacterized protein OS=Paracoccidioides brasiliensis (strain Pb18) OX=502780 GN=PADG_12122 PE=4 SV=1
C1GEY6	-1.08459	0.239638	78	0.000617658	0.000569487	Pyridoxine biosynthesis protein pyroA OS=Paracoccidioides brasiliensis (strain Pb18) OX=502780 GN=PADG_05822 PE=3 SV=1
C1GA14	-1.08442	0.0203933	1135	0.00323905	0.00298691	Clathrin heavy chain OS=Paracoccidioides brasiliensis (strain Pb18) OX=502780 GN=PADG_04100 PE=3 SV=2
C1G9A5	-1.08406	0.105486	1445	0.00240215	0.00221589	Protein disulfide-isomerase OS=Paracoccidioides brasiliensis (strain Pb18) OX=502780 GN=PADG_03841 PE=3 SV=1
C1GFE3	-1.08385	0.362241	2041	0.000288536	0.000266214	Transcription elongation factor Spt6 OS=Paracoccidioides brasiliensis (strain Pb18) OX=502780 GN=PADG_05979 PE=3 SV=2
C1GJZ7	-1.08367	0.287367	1621	0.00031785	0.00029331	40S ribosomal protein S21 OS=Paracoccidioides brasiliensis (strain Pb18) OX=502780 GN=PADG_07583 PE=3 SV=1
C1GAM9	-1.08339	0.18947	506	0.000347717	0.000320954	40S ribosomal protein S24 OS=Paracoccidioides brasiliensis (strain Pb18) OX=502780 GN=PADG_04315 PE=3 SV=2
C1G402	-1.08284	0.358155	180	0.000183923	0.000169853	Uncharacterized protein OS=Paracoccidioides brasiliensis (strain Pb18) OX=502780 GN=PADG_01668 PE=4 SV=2
C1GLT7	-1.08254	0.0292024	10	0.00289873	0.00267771	5-methyltetrahydropteroyltriglutamate-homocysteine S-methyltransferase OS=Paracoccidioides brasiliensis (strain Pb18) OX=502780 GN=PADG_08328 PE=3 SV=1
A0A0A0HTD2	-1.08185	0.375589	574	7.67085e-05	7.09048e-05	Uncharacterized protein OS=Paracoccidioides brasiliensis (strain Pb18) OX=502780 GN=PADG_11295 PE=4 SV=1
C1GKM7	-1.08112	0.110833	2821	0.00118109	0.00109247	ATP synthase subunit gamma OS=Paracoccidioides brasiliensis (strain Pb18) OX=502780 GN=PADG_07813 PE=3 SV=2
C1G6E7	-1.08023	0.263754	1537	0.000616587	0.000570792	Uncharacterized protein OS=Paracoccidioides brasiliensis (strain Pb18) OX=502780 GN=PADG_02752 PE=4 SV=2
C1G9P1	-1.07992	0.0976218	2404	0.000941785	0.000872088	Isocitrate dehydrogenase [NAD] subunit, mitochondrial OS=Paracoccidioides brasiliensis (strain Pb18) OX=502780 GN=PADG_03977 PE=3 SV=1
C1G821	-1.0788	0.200704	57	0.000614387	0.00056951	40S ribosomal protein S9 OS=Paracoccidioides brasiliensis (strain Pb18) OX=502780 GN=PADG_03326 PE=4 SV=1
C1GC00	-1.07859	0.231337	1226	0.000441518	0.000409347	Homoserine kinase OS=Paracoccidioides brasiliensis (strain Pb18) OX=502780 GN=PADG_04522 PE=3 SV=2
C1G6B4	-1.07853	0.234238	62	0.000709429	0.000657775	dTDP-4-dehydrorhamnose reductase OS=Paracoccidioides brasiliensis (strain Pb18) OX=502780 GN=PADG_02719 PE=4 SV=2
C1GJ98	-1.07839	0.187228	1834	0.000717563	0.000665404	Uncharacterized protein OS=Paracoccidioides brasiliensis (strain Pb18) OX=502780 GN=PADG_07334 PE=4 SV=1
C1GHR8	-1.07835	0.205894	1255	0.000430241	0.000398981	Uncharacterized protein OS=Paracoccidioides brasiliensis (strain Pb18) OX=502780 GN=PADG_06804 PE=4 SV=1
C1G993	-1.07787	0.379624	2782	8.38331e-05	7.7777e-05	Ribosomal protein S18 OS=Paracoccidioides brasiliensis (strain Pb18) OX=502780 GN=PADG_03829 PE=4 SV=1
C1GBZ4	-1.07769	0.118827	32	0.00122621	0.00113782	Glutamate dehydrogenase OS=Paracoccidioides brasiliensis (strain Pb18) OX=502780 GN=PADG_04516 PE=3 SV=2
C1GHP1	-1.07749	0.353019	890	0.000306956	0.000284882	Uncharacterized protein OS=Paracoccidioides brasiliensis (strain Pb18) OX=502780 GN=PADG_06777 PE=4 SV=1
C1GKS3	-1.07736	0.339365	129	0.00028828	0.00026758	Actin-related protein 2/3 complex subunit 4 OS=Paracoccidioides brasiliensis (strain Pb18) OX=502780 GN=PADG_07930 PE=3 SV=1
C1GK53	-1.07646	0.324041	468	0.000316503	0.000294022	Dolichyl-diphosphooligosaccharide--protein glycosyltransferase subunit OST2 OS=Paracoccidioides brasiliensis (strain Pb18) OX=502780 GN=PADG_07639 PE=3 SV=1
C1G140	-1.07636	0.256864	2310	0.000297041	0.000275968	Uncharacterized protein OS=Paracoccidioides brasiliensis (strain Pb18) OX=502780 GN=PADG_00580 PE=4 SV=1
C1GAH9	-1.07453	0.31077	2322	0.000276677	0.000257488	D-xylulose reductase A OS=Paracoccidioides brasiliensis (strain Pb18) OX=502780 GN=PADG_04265 PE=3 SV=1
A0A0A0HTB4	-1.07442	0.257715	160	0.000287334	0.000267432	Peptidyl-prolyl cis-trans isomerase OS=Paracoccidioides brasiliensis (strain Pb18) OX=502780 GN=PADG_12323 PE=3 SV=1
C1GE31	-1.07437	0.195565	821	0.000534733	0.00049772	Uncharacterized protein OS=Paracoccidioides brasiliensis (strain Pb18) OX=502780 GN=PADG_05517 PE=4 SV=2
C1GGT9	-1.07413	0.3272	2575	0.000114409	0.000106513	Uncharacterized protein OS=Paracoccidioides brasiliensis (strain Pb18) OX=502780 GN=PADG_06526 PE=4 SV=2
C1G4X5	-1.07343	0.342218	2035	0.000237968	0.00022169	Uncharacterized protein OS=Paracoccidioides brasiliensis (strain Pb18) OX=502780 GN=PADG_01991 PE=4 SV=1
C1G9X1	-1.07288	0.22302	2323	0.000391526	0.00036493	Eukaryotic translation initiation factor 3 subunit J OS=Paracoccidioides brasiliensis (strain Pb18) OX=502780 GN=HCR1 PE=3 SV=1
C1G9M4	-1.07175	0.285213	1732	0.000133284	0.000124361	Uncharacterized protein OS=Paracoccidioides brasiliensis (strain Pb18) OX=502780 GN=PADG_03960 PE=4 SV=2
C1G2E3	-1.07174	0.149811	825	0.000563097	0.000525405	Uncharacterized protein OS=Paracoccidioides brasiliensis (strain Pb18) OX=502780 GN=PADG_02309 PE=4 SV=2
C1G7L5	-1.07107	0.121094	2854	0.00132368	0.00123586	Uncharacterized protein OS=Paracoccidioides brasiliensis (strain Pb18) OX=502780 GN=PADG_03170 PE=4 SV=1
C1GEM8	-1.07073	0.109087	2019	0.000409487	0.000382438	Uncharacterized protein OS=Paracoccidioides brasiliensis (strain Pb18) OX=502780 GN=PADG_05714 PE=3 SV=1
C1GFX9	-1.07071	0.24071	112	0.000400478	0.000374032	Uncharacterized protein OS=Paracoccidioides brasiliensis (strain Pb18) OX=502780 GN=PADG_06165 PE=4 SV=1
C1GLV1	-1.07055	0.124403	2901	0.000390043	0.00036434	GTP-binding protein ypt1 (Fragment) OS=Paracoccidioides brasiliensis (strain Pb18) OX=502780 GN=PADG_08342 PE=4 SV=2
C1G3P9	-1.06987	0.0455303	2388	0.00129175	0.00120739	Uncharacterized protein OS=Paracoccidioides brasiliensis (strain Pb18) OX=502780 GN=PADG_01565 PE=3 SV=1
C1GN19	-1.06886	0.284885	131	0.000132971	0.000124404	40S ribosomal protein S28 OS=Paracoccidioides brasiliensis (strain Pb18) OX=502780 GN=PADG_08605 PE=3 SV=2
C1G614	-1.06883	0.368359	2206	0.000118126	0.00011052	Uncharacterized protein OS=Paracoccidioides brasiliensis (strain Pb18) OX=502780 GN=PADG_02619 PE=4 SV=1
C1GHN2	-1.06815	0.166301	1576	0.000675301	0.000632214	rRNA 2'-O-methyltransferase fibrillarin OS=Paracoccidioides brasiliensis (strain Pb18) OX=502780 GN=PADG_06768 PE=3 SV=2
C1G2M5	-1.06805	0.294258	931	0.000265538	0.000248619	Uncharacterized protein OS=Paracoccidioides brasiliensis (strain Pb18) OX=502780 GN=PADG_01191 PE=4 SV=1
C1GID7	-1.06768	0.154513	2296	0.00103378	0.000968256	Uncharacterized protein OS=Paracoccidioides brasiliensis (strain Pb18) OX=502780 GN=PADG_07023 PE=3 SV=2; Additional IDs concatenated into MaxParsimony group: Reverse_C1G4B8
C1GMY9	-1.06743	0.201428	2076	0.000265763	0.000248975	Uncharacterized protein OS=Paracoccidioides brasiliensis (strain Pb18) OX=502780 GN=PADG_08640 PE=4 SV=1
C1GN29	-1.06731	0.182911	1247	0.000370107	0.000346766	Lactoylglutathione lyase OS=Paracoccidioides brasiliensis (strain Pb18) OX=502780 GN=PADG_08673 PE=3 SV=2
C1G1P0	-1.06678	0.175967	813	0.000747876	0.000701056	Uncharacterized protein OS=Paracoccidioides brasiliensis (strain Pb18) OX=502780 GN=PADG_00780 PE=4 SV=1
C1G2V1	-1.06628	0.213008	2891	0.000521652	0.000489227	40S ribosomal protein S11 OS=Paracoccidioides brasiliensis (strain Pb18) OX=502780 GN=PADG_01267 PE=3 SV=1
A0A0A0HRJ4	-1.06613	0.349782	597	0.000132631	0.000124404	Uncharacterized protein OS=Paracoccidioides brasiliensis (strain Pb18) OX=502780 GN=PADG_12125 PE=4 SV=1
C1GFP6	-1.06565	0.412116	273	0.000113463	0.000106473	Uncharacterized protein OS=Paracoccidioides brasiliensis (strain Pb18) OX=502780 GN=PADG_06082 PE=4 SV=1
C1GL84	-1.0653	0.331978	2930	0.000255762	0.000240084	Uncharacterized protein OS=Paracoccidioides brasiliensis (strain Pb18) OX=502780 GN=PADG_07870 PE=4 SV=1
C1G4D4	-1.0652	0.316167	2050	0.000236772	0.000222279	Uncharacterized protein OS=Paracoccidioides brasiliensis (strain Pb18) OX=502780 GN=PADG_01800 PE=4 SV=1
C1G6R9	-1.06436	0.306636	2490	0.000132971	0.00012493	Uncharacterized protein OS=Paracoccidioides brasiliensis (strain Pb18) OX=502780 GN=PADG_02874 PE=4 SV=1
C1G0A3	-1.06425	0.344372	1690	0.00038037	0.000357407	Uncharacterized protein OS=Paracoccidioides brasiliensis (strain Pb18) OX=502780 GN=PADG_00293 PE=4 SV=2
C1GJ49	-1.06322	0.340364	2333	0.000226607	0.000213134	Uncharacterized protein OS=Paracoccidioides brasiliensis (strain Pb18) OX=502780 GN=PADG_07285 PE=4 SV=2
C1G6J5	-1.06226	0.264252	1606	0.000585961	0.000551617	Adenylyl cyclase-associated protein OS=Paracoccidioides brasiliensis (strain Pb18) OX=502780 GN=PADG_02800 PE=3 SV=2
C1G0C7	-1.06216	0.108034	1541	0.00189849	0.00178739	Succinate--CoA ligase [ADP-forming] subunit beta, mitochondrial OS=Paracoccidioides brasiliensis (strain Pb18) OX=502780 GN=PADG_00317 PE=3 SV=2
C1GAT8	-1.06188	0.165975	2830	0.00134165	0.00126346	UTP--glucose-1-phosphate uridylyltransferase OS=Paracoccidioides brasiliensis (strain Pb18) OX=502780 GN=PADG_04374 PE=3 SV=1
C1GE74	-1.06162	0.158675	1838	0.000963426	0.000907508	26S proteasome regulatory subunit RPN1 OS=Paracoccidioides brasiliensis (strain Pb18) OX=502780 GN=PADG_05560 PE=3 SV=2
C1G226	-1.06159	0.195133	1246	0.000359354	0.000338506	Autophagy-related protein 3 OS=Paracoccidioides brasiliensis (strain Pb18) OX=502780 GN=PADG_02192 PE=3 SV=1
C1GBI2	-1.06123	0.337211	2557	0.000113035	0.000106513	Uncharacterized protein OS=Paracoccidioides brasiliensis (strain Pb18) OX=502780 GN=PADG_04983 PE=4 SV=1
C1G9Z7	-1.06055	0.112582	2844	0.000707902	0.000667487	Eukaryotic translation initiation factor 2 subunit gamma OS=Paracoccidioides brasiliensis (strain Pb18) OX=502780 GN=PADG_04083 PE=4 SV=1
A0A0A0HV89	-1.05969	0.2556	451	0.000705881	0.000666121	Alkaline phosphatase OS=Paracoccidioides brasiliensis (strain Pb18) OX=502780 GN=PADG_11766 PE=3 SV=1
C1GJ82	-1.05891	0.294994	682	0.000103217	9.74747e-05	SVP1-like protein 2 OS=Paracoccidioides brasiliensis (strain Pb18) OX=502780 GN=PADG_07318 PE=4 SV=2
C1G8T2	-1.05878	0.40007	2784	8.4643e-05	7.99436e-05	Uncharacterized protein OS=Paracoccidioides brasiliensis (strain Pb18) OX=502780 GN=PADG_03668 PE=3 SV=1
C1G0Q2	-1.05872	0.122835	75	0.000583722	0.000551346	Uncharacterized protein OS=Paracoccidioides brasiliensis (strain Pb18) OX=502780 GN=PADG_00442 PE=4 SV=2
C1G6C8	-1.05814	0.255662	438	0.000761749	0.000719892	Uncharacterized protein OS=Paracoccidioides brasiliensis (strain Pb18) OX=502780 GN=PADG_02733 PE=4 SV=1
C1GD93	-1.05769	0.381861	2694	0.000215891	0.000204116	Uncharacterized protein OS=Paracoccidioides brasiliensis (strain Pb18) OX=502780 GN=PADG_05229 PE=4 SV=1
A0A0A0HX13	-1.05659	0.390301	1714	0.000244784	0.000231673	Uncharacterized protein OS=Paracoccidioides brasiliensis (strain Pb18) OX=502780 GN=PADG_11060 PE=4 SV=1
C1GCG4	-1.05613	0.35166	2338	0.000411674	0.000389796	Uncharacterized protein OS=Paracoccidioides brasiliensis (strain Pb18) OX=502780 GN=PADG_04686 PE=3 SV=2
A0A0A0HS42	-1.05527	0.239486	1155	0.0012835	0.00121628	Uncharacterized protein OS=Paracoccidioides brasiliensis (strain Pb18) OX=502780 GN=PADG_12437 PE=4 SV=1
A0A0A0HRK9	-1.0552	0.419465	1859	7.13159e-05	6.75854e-05	ER lumen protein-retaining receptor OS=Paracoccidioides brasiliensis (strain Pb18) OX=502780 GN=PADG_12147 PE=3 SV=1
C1GHU4	-1.05489	0.395103	2551	0.000103425	9.80438e-05	Uncharacterized protein OS=Paracoccidioides brasiliensis (strain Pb18) OX=502780 GN=PADG_06830 PE=3 SV=2
C1GG52	-1.05474	0.204665	1599	0.000450113	0.000426753	Uncharacterized protein OS=Paracoccidioides brasiliensis (strain Pb18) OX=502780 GN=PADG_06289 PE=4 SV=2
C1FYV9	-1.05469	0.450737	993	8.4537e-05	8.01531e-05	Uncharacterized protein OS=Paracoccidioides brasiliensis (strain Pb18) OX=502780 GN=PADG_00985 PE=4 SV=2
C1G050	-1.05465	0.330349	1243	0.000317583	0.000301127	Uncharacterized protein OS=Paracoccidioides brasiliensis (strain Pb18) OX=502780 GN=PADG_00240 PE=4 SV=1
C1G1P4	-1.05449	0.271695	2895	0.000751544	0.000712706	40S ribosomal protein S0 OS=Paracoccidioides brasiliensis (strain Pb18) OX=502780 GN=RPS0 PE=3 SV=1
C1GA01	-1.05403	0.268095	851	0.000544618	0.000516702	CAAX prenyl protease OS=Paracoccidioides brasiliensis (strain Pb18) OX=502780 GN=PADG_04087 PE=3 SV=1
C1GEY4	-1.05401	0.208082	2397	0.00105928	0.00100501	Probable Xaa-Pro aminopeptidase P OS=Paracoccidioides brasiliensis (strain Pb18) OX=502780 GN=AMPP PE=3 SV=2
C1GAW5	-1.05308	0.271344	1833	0.000925883	0.000879211	Pre-mRNA-processing-splicing factor 8 OS=Paracoccidioides brasiliensis (strain Pb18) OX=502780 GN=PADG_04401 PE=4 SV=1
C1GB06	-1.05286	0.418848	1676	0.000205054	0.000194759	Uncharacterized protein OS=Paracoccidioides brasiliensis (strain Pb18) OX=502780 GN=PADG_04442 PE=4 SV=1
C1GL38	-1.05267	0.330374	464	0.00054283	0.000515671	Branched-chain amino acid aminotransferase OS=Paracoccidioides brasiliensis (strain Pb18) OX=502780 GN=PADG_08045 PE=4 SV=2
C1GC43	-1.05254	0.401093	589	0.000103149	9.80007e-05	Casein kinase II subunit beta OS=Paracoccidioides brasiliensis (strain Pb18) OX=502780 GN=PADG_04565 PE=3 SV=2
C1G3B0	-1.0518	0.310267	50	0.000708293	0.000673412	Uncharacterized protein OS=Paracoccidioides brasiliensis (strain Pb18) OX=502780 GN=PADG_01426 PE=4 SV=1
C1FZ98	-1.05046	0.369	1317	0.000205431	0.000195562	Uncharacterized protein OS=Paracoccidioides brasiliensis (strain Pb18) OX=502780 GN=PADG_01124 PE=4 SV=1
C1GAB4	-1.05002	0.269835	2407	0.000953407	0.000907992	Glucose-6-phosphate 1-dehydrogenase OS=Paracoccidioides brasiliensis (strain Pb18) OX=502780 GN=PADG_04200 PE=3 SV=2
C1GHF6	-1.04893	0.357566	832	0.000541167	0.000515924	Uncharacterized protein OS=Paracoccidioides brasiliensis (strain Pb18) OX=502780 GN=PADG_06692 PE=3 SV=1
C1GK04	-1.04855	0.381472	927	0.000196019	0.000186942	Uncharacterized protein OS=Paracoccidioides brasiliensis (strain Pb18) OX=502780 GN=PADG_07590 PE=4 SV=2
C1G0F2	-1.04772	0.367155	2912	0.00041895	0.000399867	Eukaryotic translation initiation factor 3 subunit L OS=Paracoccidioides brasiliensis (strain Pb18) OX=502780 GN=PADG_00342 PE=3 SV=1
C1GLX6	-1.04745	0.256934	133	0.000297647	0.000284164	Uncharacterized protein OS=Paracoccidioides brasiliensis (strain Pb18) OX=502780 GN=PADG_08367 PE=4 SV=2
C1FZV4	-1.04723	0.30075	856	0.000298248	0.000284797	U6 snRNA-associated Sm-like protein LSm2 OS=Paracoccidioides brasiliensis (strain Pb18) OX=502780 GN=PADG_00144 PE=3 SV=2
C1G6V8	-1.04683	0.198061	2429	0.000502144	0.000479683	Adenylyl-sulfate kinase OS=Paracoccidioides brasiliensis (strain Pb18) OX=502780 GN=PADG_02913 PE=3 SV=1
C1G8I4	-1.04666	0.417539	2510	0.000195444	0.00018673	Uncharacterized protein OS=Paracoccidioides brasiliensis (strain Pb18) OX=502780 GN=PADG_03570 PE=4 SV=2
C1GMU6	-1.04627	0.450358	2127	9.20049e-05	8.7936e-05	Uncharacterized protein OS=Paracoccidioides brasiliensis (strain Pb18) OX=502780 GN=PADG_08590 PE=3 SV=1
C1G2D0	-1.04579	0.219518	127	0.000399929	0.000382418	Eukaryotic translation initiation factor 3 subunit F OS=Paracoccidioides brasiliensis (strain Pb18) OX=502780 GN=PADG_02296 PE=3 SV=1
C1G4I6	-1.04518	0.197215	395	0.00122825	0.00117515	Uncharacterized protein OS=Paracoccidioides brasiliensis (strain Pb18) OX=502780 GN=PADG_01852 PE=4 SV=1
C1FZT5	-1.04509	0.361996	2074	0.000307105	0.000293856	Grx4 family monothiol glutaredoxin OS=Paracoccidioides brasiliensis (strain Pb18) OX=502780 GN=PADG_00125 PE=4 SV=1
A0A0A0HX82	-1.04418	0.0440212	12	0.00205255	0.0019657	Phosphoglucomutase OS=Paracoccidioides brasiliensis (strain Pb18) OX=502780 GN=PADG_11132 PE=3 SV=1
A0A0A0HUT3	-1.04388	0.456126	1816	0.000102322	9.8021e-05	Replication factor C subunit 4 OS=Paracoccidioides brasiliensis (strain Pb18) OX=502780 GN=PADG_12056 PE=3 SV=1
C1G1Z1	-1.04379	0.36084	2923	0.000483442	0.00046316	Actin cytoskeleton-regulatory complex protein END3 OS=Paracoccidioides brasiliensis (strain Pb18) OX=502780 GN=PADG_02157 PE=4 SV=1
C1GIH8	-1.04342	0.346119	1275	0.000278428	0.000266843	Uncharacterized protein OS=Paracoccidioides brasiliensis (strain Pb18) OX=502780 GN=PADG_07064 PE=4 SV=1
C1G225	-1.04327	0.299486	549	0.000195053	0.000186963	Uncharacterized protein OS=Paracoccidioides brasiliensis (strain Pb18) OX=502780 GN=PADG_02191 PE=4 SV=1
C1G8F8	-1.04307	0.222953	1147	0.00132553	0.00127079	Uncharacterized protein OS=Paracoccidioides brasiliensis (strain Pb18) OX=502780 GN=PADG_03544 PE=4 SV=1
C1GFU1	-1.04288	0.418519	2938	0.000203507	0.000195139	Uncharacterized protein OS=Paracoccidioides brasiliensis (strain Pb18) OX=502780 GN=PADG_06127 PE=4 SV=2
C1GHR9	-1.04261	0.226424	2823	0.00136323	0.00130752	Uncharacterized protein OS=Paracoccidioides brasiliensis (strain Pb18) OX=502780 GN=PADG_06805 PE=3 SV=1
C1G7R0	-1.04248	0.374331	2330	0.000399589	0.000383305	Uncharacterized protein OS=Paracoccidioides brasiliensis (strain Pb18) OX=502780 GN=PADG_03215 PE=4 SV=2
C1G0Q3	-1.04247	0.21294	1552	0.00125977	0.00120844	Dihydropteroate synthase OS=Paracoccidioides brasiliensis (strain Pb18) OX=502780 GN=PADG_00443 PE=4 SV=2
A0A0A0HUV5	-1.0423	0.424778	2725	0.000214043	0.000205356	DNA helicase OS=Paracoccidioides brasiliensis (strain Pb18) OX=502780 GN=PADG_11664 PE=3 SV=1
C1G9D5	-1.04226	0.22783	19	0.00181475	0.00174117	Urease OS=Paracoccidioides brasiliensis (strain Pb18) OX=502780 GN=PADG_03871 PE=3 SV=2
C1FZM7	-1.04187	0.348654	2025	0.000268051	0.000257278	Uncharacterized protein OS=Paracoccidioides brasiliensis (strain Pb18) OX=502780 GN=PADG_00067 PE=4 SV=1
C1G6Q5	-1.04161	0.25918	524	0.000287385	0.000275904	Uncharacterized protein OS=Paracoccidioides brasiliensis (strain Pb18) OX=502780 GN=PADG_02860 PE=3 SV=2
C1G4W6	-1.04142	0.253653	2873	0.000851702	0.000817829	Uncharacterized protein OS=Paracoccidioides brasiliensis (strain Pb18) OX=502780 GN=PADG_01982 PE=4 SV=2
C1GAA7	-1.04126	0.322141	107	0.000388586	0.00037319	Uncharacterized protein OS=Paracoccidioides brasiliensis (strain Pb18) OX=502780 GN=PADG_04193 PE=4 SV=1
C1G8G5	-1.04106	0.411208	474	0.00037129	0.000356647	F-actin-capping protein subunit alpha OS=Paracoccidioides brasiliensis (strain Pb18) OX=502780 GN=PADG_03551 PE=3 SV=1
C1G0L5	-1.04031	0.33904	2415	0.000667301	0.000641443	Uncharacterized protein OS=Paracoccidioides brasiliensis (strain Pb18) OX=502780 GN=PADG_00405 PE=4 SV=1
C1G9Y9	-1.04029	0.447572	665	8.30988e-05	7.98801e-05	Uncharacterized protein OS=Paracoccidioides brasiliensis (strain Pb18) OX=502780 GN=PADG_04075 PE=4 SV=1
C1GMA5	-1.03955	0.321021	1839	0.000775395	0.000745897	Uncharacterized protein OS=Paracoccidioides brasiliensis (strain Pb18) OX=502780 GN=PADG_08191 PE=4 SV=1
C1G6A7	-1.03907	0.445243	261	9.29843e-05	8.94878e-05	Uncharacterized protein OS=Paracoccidioides brasiliensis (strain Pb18) OX=502780 GN=PADG_02712 PE=4 SV=1
C1GBL1	-1.03876	0.407146	113	0.000361412	0.000347924	Uncharacterized protein OS=Paracoccidioides brasiliensis (strain Pb18) OX=502780 GN=PADG_05012 PE=4 SV=2
C1G9D6	-1.03872	0.314952	2414	0.000666304	0.000641466	NADH-cytochrome b5 reductase OS=Paracoccidioides brasiliensis (strain Pb18) OX=502780 GN=PADG_03872 PE=3 SV=1
C1GE86	-1.03843	0.410368	630	0.000193909	0.000186732	Uncharacterized protein OS=Paracoccidioides brasiliensis (strain Pb18) OX=502780 GN=PADG_05572 PE=4 SV=2
C1G471	-1.03822	0.382285	224	0.000193846	0.00018671	Uncharacterized protein OS=Paracoccidioides brasiliensis (strain Pb18) OX=502780 GN=PADG_01737 PE=4 SV=2
C1G5L7	-1.03814	0.282981	1217	0.000655478	0.000631394	Uncharacterized protein OS=Paracoccidioides brasiliensis (strain Pb18) OX=502780 GN=PADG_02472 PE=4 SV=1
C1G9W8	-1.0373	0.377971	1396	9.22805e-05	8.89619e-05	Ribonucleoprotein-associated protein OS=Paracoccidioides brasiliensis (strain Pb18) OX=502780 GN=PADG_04054 PE=4 SV=2
C1G2H2	-1.03707	0.339824	1208	0.00047109	0.000454251	Uncharacterized protein OS=Paracoccidioides brasiliensis (strain Pb18) OX=502780 GN=PADG_02338 PE=4 SV=1
C1G873	-1.03707	0.451378	1726	0.000100543	9.69488e-05	Uncharacterized protein OS=Paracoccidioides brasiliensis (strain Pb18) OX=502780 GN=PADG_03378 PE=4 SV=2
A0A0A0HVG2	-1.03681	0.360327	2299	0.000635787	0.000613212	Uncharacterized protein OS=Paracoccidioides brasiliensis (strain Pb18) OX=502780 GN=PADG_11822 PE=4 SV=1
A0A0A0HUK5	-1.03676	0.312768	1597	0.000636865	0.000614284	Uncharacterized protein OS=Paracoccidioides brasiliensis (strain Pb18) OX=502780 GN=PADG_11446 PE=4 SV=1
C1G8U8	-1.03663	0.439455	213	0.000185182	0.000178639	Uncharacterized protein OS=Paracoccidioides brasiliensis (strain Pb18) OX=502780 GN=PADG_03684 PE=4 SV=1
C1G0Z0	-1.03637	0.421642	991	0.000194613	0.000187784	Uncharacterized protein OS=Paracoccidioides brasiliensis (strain Pb18) OX=502780 GN=PADG_00530 PE=4 SV=1
C1G5S2	-1.03593	0.396825	1412	9.2332e-05	8.91293e-05	Uncharacterized protein OS=Paracoccidioides brasiliensis (strain Pb18) OX=502780 GN=PADG_02527 PE=4 SV=2
C1GGR7	-1.0355	0.42445	186	0.000184351	0.00017803	Uncharacterized protein OS=Paracoccidioides brasiliensis (strain Pb18) OX=502780 GN=PADG_06504 PE=4 SV=2
C1GE98	-1.03516	0.344755	448	0.000543877	0.000525404	Uncharacterized protein OS=Paracoccidioides brasiliensis (strain Pb18) OX=502780 GN=PADG_05584 PE=4 SV=2
C1G0N1	-1.03471	0.450801	1293	0.000164415	0.000158899	Uncharacterized protein OS=Paracoccidioides brasiliensis (strain Pb18) OX=502780 GN=PADG_00421 PE=4 SV=1
C1GBQ7	-1.0347	0.3176	49	0.000716532	0.0006925	Chorismate mutase OS=Paracoccidioides brasiliensis (strain Pb18) OX=502780 GN=PADG_05058 PE=4 SV=1
C1GF86	-1.03469	0.258357	25	0.0014462	0.00139771	Uncharacterized protein OS=Paracoccidioides brasiliensis (strain Pb18) OX=502780 GN=PADG_05922 PE=4 SV=2
C1G6H2	-1.03465	0.256438	797	0.00106764	0.00103189	Threonine synthase OS=Paracoccidioides brasiliensis (strain Pb18) OX=502780 GN=PADG_02777 PE=4 SV=1
C1G9U8	-1.03432	0.303144	424	0.000789644	0.000763444	Chaperone DnaJ OS=Paracoccidioides brasiliensis (strain Pb18) OX=502780 GN=PADG_04034 PE=3 SV=1
A0A0A0HWW6	-1.03419	0.413225	2718	0.000174287	0.000168526	Uncharacterized protein OS=Paracoccidioides brasiliensis (strain Pb18) OX=502780 GN=PADG_11395 PE=4 SV=1
C1G6M0	-1.03387	0.363589	2937	0.000174626	0.000168906	U6 snRNA-associated Sm-like protein LSm8 OS=Paracoccidioides brasiliensis (strain Pb18) OX=502780 GN=LSM8 PE=3 SV=2
C1GN69	-1.03329	0.387174	2922	0.000440868	0.000426666	Uncharacterized protein OS=Paracoccidioides brasiliensis (strain Pb18) OX=502780 GN=PADG_08705 PE=4 SV=2
C1G3L2	-1.03322	0.415077	202	0.000156382	0.000151354	Endoplasmic reticulum vesicle protein 25 OS=Paracoccidioides brasiliensis (strain Pb18) OX=502780 GN=PADG_01528 PE=3 SV=2
C1GA22	-1.0329	0.397737	541	0.000266919	0.000258416	Mitochondrial pyruvate carrier OS=Paracoccidioides brasiliensis (strain Pb18) OX=502780 GN=PADG_04108 PE=3 SV=1
C1GJI2	-1.03263	0.327278	35	0.000964474	0.000933998	Superoxide dismutase [Cu-Zn] OS=Paracoccidioides brasiliensis (strain Pb18) OX=502780 GN=PADG_07418 PE=4 SV=2
C1GHQ7	-1.03236	0.336782	2931	0.000266191	0.000257847	Uncharacterized protein OS=Paracoccidioides brasiliensis (strain Pb18) OX=502780 GN=PADG_06793 PE=4 SV=2
C1G6T5	-1.0317	0.463585	2466	8.26071e-05	8.00692e-05	Uncharacterized protein OS=Paracoccidioides brasiliensis (strain Pb18) OX=502780 GN=PADG_02890 PE=4 SV=2
C1GB89	-1.03157	0.389707	465	0.000687538	0.000666498	Altered inheritance of mitochondria protein 24, mitochondrial OS=Paracoccidioides brasiliensis (strain Pb18) OX=502780 GN=PADG_04890 PE=3 SV=2
C1G437	-1.03156	0.387594	87	0.000623889	0.000604802	V-type proton ATPase subunit a OS=Paracoccidioides brasiliensis (strain Pb18) OX=502780 GN=PADG_01703 PE=3 SV=2
A0A0A0HQV2	-1.03135	0.395384	875	0.000339706	0.000329381	NAD(P)H-hydrate epimerase OS=Paracoccidioides brasiliensis (strain Pb18) OX=502780 GN=PADG_12274 PE=3 SV=1
C1GAG2	-1.03121	0.448366	1661	0.000173482	0.000168232	Uncharacterized protein OS=Paracoccidioides brasiliensis (strain Pb18) OX=502780 GN=PADG_04248 PE=4 SV=2
C1G0Q6	-1.0305	0.290963	1992	0.00122945	0.00119306	Uncharacterized protein OS=Paracoccidioides brasiliensis (strain Pb18) OX=502780 GN=PADG_00446 PE=4 SV=2; Additional IDs concatenated into MaxParsimony group: Reverse_C1GDC5
C1G5S5	-1.02989	0.454823	2710	0.000174019	0.000168969	Small nuclear ribonucleoprotein G OS=Paracoccidioides brasiliensis (strain Pb18) OX=502780 GN=PADG_02530 PE=3 SV=2
C1GDT4	-1.02959	0.402628	565	0.000173859	0.000168862	Uncharacterized protein OS=Paracoccidioides brasiliensis (strain Pb18) OX=502780 GN=PADG_05420 PE=4 SV=2
C1GF60	-1.02919	0.38192	1954	0.000595109	0.000578233	D-3-phosphoglycerate dehydrogenase OS=Paracoccidioides brasiliensis (strain Pb18) OX=502780 GN=PADG_05896 PE=3 SV=2
A0A0A0HT06	-1.02905	0.37298	67	0.00076778	0.000746103	Uncharacterized protein OS=Paracoccidioides brasiliensis (strain Pb18) OX=502780 GN=PADG_12469 PE=4 SV=1
C1GLG2	-1.02858	0.375641	820	0.000511793	0.000497571	Adenylate kinase OS=Paracoccidioides brasiliensis (strain Pb18) OX=502780 GN=ADK1 PE=3 SV=1
C1G092	-1.02814	0.380691	89	0.000430291	0.000418513	GTP-binding protein ypt2 OS=Paracoccidioides brasiliensis (strain Pb18) OX=502780 GN=PADG_00282 PE=4 SV=1
C1G945	-1.02813	0.377931	82	0.000347769	0.000338253	60S ribosomal protein L30 OS=Paracoccidioides brasiliensis (strain Pb18) OX=502780 GN=PADG_03781 PE=3 SV=1
A0A0A0HZA1	-1.02769	0.401073	140	0.000236772	0.000230392	Uncharacterized protein OS=Paracoccidioides brasiliensis (strain Pb18) OX=502780 GN=PADG_11131 PE=4 SV=1
C1GJD3	-1.02638	0.2824	415	0.000912508	0.00088905	Uncharacterized protein OS=Paracoccidioides brasiliensis (strain Pb18) OX=502780 GN=PADG_07369 PE=3 SV=2
A0A0A0HVK7	-1.02587	0.427533	148	0.000400178	0.000390088	NADPH--cytochrome P450 reductase OS=Paracoccidioides brasiliensis (strain Pb18) OX=502780 GN=cprA PE=3 SV=1
A0A0A0HT22	-1.02561	0.325821	40	0.000920916	0.00089792	Uncharacterized protein OS=Paracoccidioides brasiliensis (strain Pb18) OX=502780 GN=PADG_12447 PE=4 SV=1
C1G9U1	-1.0248	0.390339	540	0.000319066	0.000311346	Uncharacterized protein OS=Paracoccidioides brasiliensis (strain Pb18) OX=502780 GN=PADG_04027 PE=4 SV=2
C1GJT3	-1.0247	0.478463	710	9.09019e-05	8.87106e-05	Ribosomal protein L1 OS=Paracoccidioides brasiliensis (strain Pb18) OX=502780 GN=PADG_07519 PE=4 SV=1
C1G7P5	-1.02425	0.452947	1301	0.000245819	0.000239999	Galactose-1-phosphate uridylyltransferase OS=Paracoccidioides brasiliensis (strain Pb18) OX=502780 GN=PADG_03200 PE=3 SV=1
C1GHS5	-1.02329	0.318427	385	0.0014364	0.00140371	Uncharacterized protein OS=Paracoccidioides brasiliensis (strain Pb18) OX=502780 GN=PADG_06811 PE=4 SV=1
C1G6V9	-1.02324	0.187777	1051	0.00137447	0.00134326	Aminomethyltransferase OS=Paracoccidioides brasiliensis (strain Pb18) OX=502780 GN=PADG_02914 PE=3 SV=2
C1GM70	-1.02317	0.460909	1759	0.000164197	0.000160479	Uncharacterized protein OS=Paracoccidioides brasiliensis (strain Pb18) OX=502780 GN=PADG_08156 PE=4 SV=2
C1G3H2	-1.02234	0.266694	1598	0.000563965	0.00055164	Uncharacterized protein OS=Paracoccidioides brasiliensis (strain Pb18) OX=502780 GN=PADG_01488 PE=4 SV=1
C1GFQ8	-1.02217	0.471477	1073	6.17061e-05	6.03679e-05	SURF1-like protein OS=Paracoccidioides brasiliensis (strain Pb18) OX=502780 GN=PADG_06094 PE=3 SV=2
C1G1W8	-1.02179	0.412162	879	0.000318172	0.000311387	Coatomer subunit epsilon OS=Paracoccidioides brasiliensis (strain Pb18) OX=502780 GN=PADG_02134 PE=3 SV=1
A0A0A0HR13	-1.02173	0.409577	2037	0.000308401	0.000301843	Uncharacterized protein OS=Paracoccidioides brasiliensis (strain Pb18) OX=502780 GN=PADG_12214 PE=4 SV=1
C1GH49	-1.0212	0.337389	409	0.0010536	0.00103172	GMP synthase [glutamine-hydrolyzing] OS=Paracoccidioides brasiliensis (strain Pb18) OX=502780 GN=PADG_06585 PE=3 SV=2
C1G994	-1.02105	0.352088	31	0.00128193	0.0012555	Uncharacterized protein OS=Paracoccidioides brasiliensis (strain Pb18) OX=502780 GN=PADG_03830 PE=4 SV=2
C1GN83	-1.02099	0.360993	1591	0.000626599	0.000613715	CMGC/GSK protein kinase OS=Paracoccidioides brasiliensis (strain Pb18) OX=502780 GN=PADG_08722 PE=3 SV=2
C1G785	-1.02068	0.418978	1171	0.000390434	0.000382525	GTP-binding protein ypt5 OS=Paracoccidioides brasiliensis (strain Pb18) OX=502780 GN=PADG_03040 PE=4 SV=1
C1GKR7	-1.02011	0.407432	2308	0.000326701	0.000320259	60S ribosomal protein L24 OS=Paracoccidioides brasiliensis (strain Pb18) OX=502780 GN=PADG_07924 PE=4 SV=2
C1G193	-1.02008	0.451734	1709	0.00015405	0.000151017	Uncharacterized protein OS=Paracoccidioides brasiliensis (strain Pb18) OX=502780 GN=PADG_00633 PE=4 SV=2
C1GHV2	-1.01997	0.345797	1571	0.00078015	0.000764878	40S ribosomal protein S5 OS=Paracoccidioides brasiliensis (strain Pb18) OX=502780 GN=PADG_06838 PE=3 SV=2
C1GHV1	-1.01937	0.421182	121	0.000453103	0.000444493	Uncharacterized protein OS=Paracoccidioides brasiliensis (strain Pb18) OX=502780 GN=PADG_06837 PE=4 SV=1
C1GAG4	-1.01872	0.381031	403	0.00144778	0.00142118	Uncharacterized protein OS=Paracoccidioides brasiliensis (strain Pb18) OX=502780 GN=PADG_04250 PE=3 SV=2
C1GIB1	-1.01771	0.462023	2342	0.000163105	0.000160266	Uncharacterized protein OS=Paracoccidioides brasiliensis (strain Pb18) OX=502780 GN=PADG_06997 PE=4 SV=2
C1GF13	-1.01743	0.451642	514	0.000307169	0.000301906	Uncharacterized protein OS=Paracoccidioides brasiliensis (strain Pb18) OX=502780 GN=PADG_05849 PE=4 SV=2
C1GGW3	-1.01731	0.420072	420	0.000832822	0.000818652	Uncharacterized protein OS=Paracoccidioides brasiliensis (strain Pb18) OX=502780 GN=PADG_06182 PE=4 SV=2
C1GE34	-1.01712	0.426181	151	0.000307545	0.000302369	mRNA cleavage and polyadenylation factor CLP1 OS=Paracoccidioides brasiliensis (strain Pb18) OX=502780 GN=CLP1 PE=3 SV=2
C1GHF2	-1.01613	0.471607	1712	0.000134355	0.000132222	GPI-anchor transamidase OS=Paracoccidioides brasiliensis (strain Pb18) OX=502780 GN=PADG_06688 PE=3 SV=1
C1GFS4	-1.01584	0.454342	877	0.0003078	0.000303	Translation initiation factor SUI1 OS=Paracoccidioides brasiliensis (strain Pb18) OX=502780 GN=PADG_06110 PE=4 SV=2
C1FYN6	-1.01544	0.374354	788	0.00112945	0.00111228	Uncharacterized protein OS=Paracoccidioides brasiliensis (strain Pb18) OX=502780 GN=PADG_00912 PE=4 SV=2
C1GEA4	-1.01464	0.438304	2357	0.000378976	0.000373506	AGC/PKC protein kinase OS=Paracoccidioides brasiliensis (strain Pb18) OX=502780 GN=PADG_05590 PE=4 SV=2
C1G7I1	-1.01445	0.45073	2920	0.000432317	0.000426161	Uncharacterized protein OS=Paracoccidioides brasiliensis (strain Pb18) OX=502780 GN=PADG_03136 PE=4 SV=1
C1G547	-1.01305	0.388411	1140	0.00172089	0.00169873	Pyruvate dehydrogenase (Acetyl-transferring) E1 component, alpha subunit OS=Paracoccidioides brasiliensis (strain Pb18) OX=502780 GN=PADG_02063 PE=4 SV=1
C1GD24	-1.01276	0.42179	2849	0.00171961	0.00169794	Dipeptidyl peptidase 3 OS=Paracoccidioides brasiliensis (strain Pb18) OX=502780 GN=PADG_05160 PE=3 SV=2
C1G765	-1.01275	0.411405	431	0.000891152	0.000879929	Uncharacterized protein OS=Paracoccidioides brasiliensis (strain Pb18) OX=502780 GN=PADG_03020 PE=3 SV=1
C1G1R9	-1.01255	0.465635	1337	0.000215744	0.00021307	Uncharacterized protein OS=Paracoccidioides brasiliensis (strain Pb18) OX=502780 GN=PADG_02085 PE=4 SV=1
C1G589	-1.01081	0.44072	85	0.000512834	0.000507348	Uncharacterized protein OS=Paracoccidioides brasiliensis (strain Pb18) OX=502780 GN=PADG_03459 PE=4 SV=2
C1GCP7	-1.0107	0.458947	1375	0.000143475	0.000141956	Uncharacterized protein OS=Paracoccidioides brasiliensis (strain Pb18) OX=502780 GN=PADG_04769 PE=3 SV=1
A0A0A0HVL0	-1.00993	0.446893	2012	0.000522407	0.000517272	Uncharacterized protein OS=Paracoccidioides brasiliensis (strain Pb18) OX=502780 GN=PADG_11062 PE=4 SV=1
A0A0A0HUD7	-1.00983	0.452616	2890	0.000431647	0.000427445	Uncharacterized protein OS=Paracoccidioides brasiliensis (strain Pb18) OX=502780 GN=PADG_11936 PE=4 SV=1
C1GCG5	-1.00938	0.448584	485	0.000430139	0.00042614	Uncharacterized protein OS=Paracoccidioides brasiliensis (strain Pb18) OX=502780 GN=PADG_04687 PE=4 SV=2
C1G7L9	-1.00895	0.48961	517	6.78167e-05	6.72154e-05	Uncharacterized protein OS=Paracoccidioides brasiliensis (strain Pb18) OX=502780 GN=PADG_03174 PE=4 SV=1
C1G6T7	-1.00717	0.484566	2207	0.000152013	0.000150931	Uncharacterized protein OS=Paracoccidioides brasiliensis (strain Pb18) OX=502780 GN=PADG_02892 PE=4 SV=1
C1GJB6	-1.00672	0.482217	249	0.000112984	0.00011223	Uncharacterized protein OS=Paracoccidioides brasiliensis (strain Pb18) OX=502780 GN=PADG_07352 PE=4 SV=2
C1G5J1	-1.00635	0.474681	2438	0.000438707	0.000435937	60S acidic ribosomal protein P2 OS=Paracoccidioides brasiliensis (strain Pb18) OX=502780 GN=PADG_02446 PE=3 SV=1
C1GJN2	-1.00625	0.485	2711	0.000268364	0.000266697	Uncharacterized protein OS=Paracoccidioides brasiliensis (strain Pb18) OX=502780 GN=PADG_07468 PE=3 SV=2
C1GGS9	-1.00619	0.484765	1377	0.000133951	0.000133126	DNA primase OS=Paracoccidioides brasiliensis (strain Pb18) OX=502780 GN=PADG_06516 PE=3 SV=2
C1G4M0	-1.00536	0.464881	779	0.00154715	0.0015389	Adenosylhomocysteinase OS=Paracoccidioides brasiliensis (strain Pb18) OX=502780 GN=PADG_01886 PE=3 SV=2
C1GGB5	-1.00533	0.485451	922	0.000215265	0.000214124	Calcium-binding protein NCS-1 OS=Paracoccidioides brasiliensis (strain Pb18) OX=502780 GN=PADG_06352 PE=4 SV=2
C1G7B3	-1.00524	0.46872	389	0.00152798	0.00152002	Uncharacterized protein OS=Paracoccidioides brasiliensis (strain Pb18) OX=502780 GN=PADG_03068 PE=4 SV=2
C1GDA1	-1.00503	0.481914	2503	0.000134115	0.000133443	Uncharacterized protein OS=Paracoccidioides brasiliensis (strain Pb18) OX=502780 GN=PADG_05237 PE=4 SV=1
C1GB51	-1.00492	0.487731	2902	0.000429339	0.000427235	Uncharacterized protein OS=Paracoccidioides brasiliensis (strain Pb18) OX=502780 GN=PADG_04852 PE=4 SV=1
C1GB68	-1.00481	0.471566	817	0.000563146	0.000560448	Uncharacterized protein OS=Paracoccidioides brasiliensis (strain Pb18) OX=502780 GN=PADG_04869 PE=4 SV=1
C1G6T2	-1.00477	0.479938	2454	0.00042902	0.000426982	Uncharacterized protein OS=Paracoccidioides brasiliensis (strain Pb18) OX=502780 GN=PADG_02887 PE=4 SV=1
C1GAY7	-1.00474	0.489799	189	0.000196422	0.000195496	Uncharacterized protein OS=Paracoccidioides brasiliensis (strain Pb18) OX=502780 GN=PADG_04423 PE=4 SV=2
C1FYG3	-1.00418	0.492683	200	7.12009e-05	7.09048e-05	Diphthine synthase OS=Paracoccidioides brasiliensis (strain Pb18) OX=502780 GN=PADG_00839 PE=3 SV=1
C1G2C1	-1.00402	0.494407	946	8.90654e-05	8.8709e-05	Uncharacterized protein OS=Paracoccidioides brasiliensis (strain Pb18) OX=502780 GN=PADG_02287 PE=3 SV=2
C1GF97	-1.00397	0.494134	1465	0.000132428	0.000131904	Uncharacterized protein OS=Paracoccidioides brasiliensis (strain Pb18) OX=502780 GN=PADG_05933 PE=4 SV=1
C1G389	-1.00362	0.48543	2435	0.000624777	0.000622526	Uncharacterized protein OS=Paracoccidioides brasiliensis (strain Pb18) OX=502780 GN=PADG_01405 PE=4 SV=2
C1G7X8	-1.00329	0.491042	495	0.000472466	0.000470917	ATP-dependent RNA helicase DBP5 OS=Paracoccidioides brasiliensis (strain Pb18) OX=502780 GN=PADG_03283 PE=3 SV=2
A0A0A0HYU1	-1.00288	0.493662	2775	0.000134355	0.000133969	Uncharacterized protein OS=Paracoccidioides brasiliensis (strain Pb18) OX=502780 GN=PADG_11364 PE=3 SV=1
C1GE52	-1.00251	0.48303	800	0.000838743	0.000836646	Uncharacterized protein OS=Paracoccidioides brasiliensis (strain Pb18) OX=502780 GN=PADG_05538 PE=3 SV=1
C1G175	-1.00201	0.480855	2837	0.000819664	0.00081802	Proteasome subunit alpha type OS=Paracoccidioides brasiliensis (strain Pb18) OX=502780 GN=PADG_00615 PE=3 SV=2
C1GKR8	-1.0004	0.498601	878	0.000338829	0.000338695	Ubiquitin-conjugating enzyme E2 N OS=Paracoccidioides brasiliensis (strain Pb18) OX=502780 GN=PADG_07925 PE=3 SV=1
C1GC65	-1.00034	0.497674	799	0.000810712	0.000810434	Glutathione peroxidase OS=Paracoccidioides brasiliensis (strain Pb18) OX=502780 GN=PADG_04587 PE=3 SV=1
C1G3N5	-1.00029	0.498292	1942	0.000667678	0.000667488	Thioredoxin reductase OS=Paracoccidioides brasiliensis (strain Pb18) OX=502780 GN=PADG_01551 PE=3 SV=2
C1FZV0	-1.0002	0.499183	1619	0.000337078	0.000337012	Uncharacterized protein OS=Paracoccidioides brasiliensis (strain Pb18) OX=502780 GN=PADG_00140 PE=4 SV=1
C1G5H5	-1.00009	0.499851	2351	0.000338576	0.000338546	Uncharacterized protein OS=Paracoccidioides brasiliensis (strain Pb18) OX=502780 GN=PADG_02430 PE=4 SV=2
C1GLY5	-1.00002	0.499922	861	0.00052373	0.00052372	Aspartate-semialdehyde dehydrogenase OS=Paracoccidioides brasiliensis (strain Pb18) OX=502780 GN=PADG_08376 PE=4 SV=2
C1GD60	1.00054	0.499476	209	8.92092e-05	8.92576e-05	1-acyl-sn-glycerol-3-phosphate acyltransferase OS=Paracoccidioides brasiliensis (strain Pb18) OX=502780 GN=PADG_05196 PE=3 SV=1
C1GHB9	1.00075	0.495805	2863	0.000471845	0.000472201	Coatomer subunit delta OS=Paracoccidioides brasiliensis (strain Pb18) OX=502780 GN=PADG_06655 PE=3 SV=2
C1G942	1.00123	0.492918	46	0.000657326	0.000658135	60S ribosomal protein L10-A OS=Paracoccidioides brasiliensis (strain Pb18) OX=502780 GN=PADG_03778 PE=4 SV=1
C1G3D9	1.00151	0.487473	785	0.00092323	0.00092462	Uncharacterized protein OS=Paracoccidioides brasiliensis (strain Pb18) OX=502780 GN=PADG_01455 PE=4 SV=2
C1G9K7	1.00161	0.489681	2406	0.000780923	0.000782177	Phosphomannomutase OS=Paracoccidioides brasiliensis (strain Pb18) OX=502780 GN=PADG_03943 PE=3 SV=1
C1FYR9	1.00232	0.494435	2315	0.000391788	0.000392699	Actin-related protein 2/3 complex subunit 5 OS=Paracoccidioides brasiliensis (strain Pb18) OX=502780 GN=PADG_00945 PE=3 SV=1
C1G506	1.00276	0.491354	1604	0.000514797	0.000516218	Clathrin light chain OS=Paracoccidioides brasiliensis (strain Pb18) OX=502780 GN=PADG_02022 PE=3 SV=1
C1G3Q1	1.00566	0.479944	97	0.000443016	0.000445525	Uncharacterized protein OS=Paracoccidioides brasiliensis (strain Pb18) OX=502780 GN=PADG_01567 PE=4 SV=2
C1GB34	1.0058	0.477456	2884	0.00097232	0.000977957	Uncharacterized protein OS=Paracoccidioides brasiliensis (strain Pb18) OX=502780 GN=PADG_04835 PE=4 SV=1
C1GEC6	1.00612	0.491004	936	0.000131878	0.000132685	Uncharacterized protein OS=Paracoccidioides brasiliensis (strain Pb18) OX=502780 GN=PADG_05612 PE=4 SV=1
C1GDM0	1.00621	0.461033	1963	0.000441749	0.000444493	Uncharacterized protein OS=Paracoccidioides brasiliensis (strain Pb18) OX=502780 GN=PADG_05356 PE=4 SV=1
C1FZK1	1.00624	0.459068	2424	0.000583294	0.000586936	Uncharacterized protein OS=Paracoccidioides brasiliensis (strain Pb18) OX=502780 GN=PADG_00041 PE=4 SV=1
C1GH32	1.00685	0.431881	2855	0.000821038	0.000826658	Uncharacterized protein OS=Paracoccidioides brasiliensis (strain Pb18) OX=502780 GN=PADG_06568 PE=3 SV=1
C1GCH7	1.00717	0.488417	1327	6.15911e-05	6.20325e-05	Uncharacterized protein OS=Paracoccidioides brasiliensis (strain Pb18) OX=502780 GN=PADG_04699 PE=4 SV=1
C1FZH1	1.00724	0.468976	1183	0.000794005	0.000799749	Uncharacterized protein OS=Paracoccidioides brasiliensis (strain Pb18) OX=502780 GN=PADG_00011 PE=4 SV=1
C1GI70	1.00768	0.425753	1986	0.00106764	0.00107585	Vacuolar proton pump subunit B OS=Paracoccidioides brasiliensis (strain Pb18) OX=502780 GN=PADG_06956 PE=3 SV=1
C1G812	1.00844	0.478972	953	0.00019407	0.000195708	Sorting nexin-3 OS=Paracoccidioides brasiliensis (strain Pb18) OX=502780 GN=PADG_03317 PE=4 SV=2
C1G9T0	1.0085	0.466569	2900	0.00085504	0.000862312	Eukaryotic translation initiation factor 3 subunit A OS=Paracoccidioides brasiliensis (strain Pb18) OX=502780 GN=TIF32 PE=3 SV=2
C1G1H7	1.00856	0.474821	1381	0.000194337	0.000196001	Uncharacterized protein OS=Paracoccidioides brasiliensis (strain Pb18) OX=502780 GN=PADG_00717 PE=4 SV=2
C1G1H8	1.00894	0.461616	1938	0.000545602	0.000550481	Histone chaperone OS=Paracoccidioides brasiliensis (strain Pb18) OX=502780 GN=PADG_00718 PE=3 SV=1
C1G573	1.00925	0.486651	1011	0.000140319	0.000141617	Uncharacterized protein OS=Paracoccidioides brasiliensis (strain Pb18) OX=502780 GN=PADG_03443 PE=4 SV=1
C1GDQ2	1.00986	0.452858	1186	0.000730368	0.000737571	Asparagine-tRNA ligase OS=Paracoccidioides brasiliensis (strain Pb18) OX=502780 GN=PADG_05388 PE=4 SV=2
C1GDK1	1.00991	0.466747	52	0.000730527	0.000737764	Glutamate-5-semialdehyde dehydrogenase OS=Paracoccidioides brasiliensis (strain Pb18) OX=502780 GN=PADG_05337 PE=3 SV=1
C1G2Y7	1.01019	0.460327	1665	0.000246006	0.000248512	Uncharacterized protein OS=Paracoccidioides brasiliensis (strain Pb18) OX=502780 GN=PADG_01303 PE=4 SV=1
C1GMN0	1.0102	0.476939	2059	0.00024692	0.000249439	AmmeMemoRadiSam system protein B OS=Paracoccidioides brasiliensis (strain Pb18) OX=502780 GN=PADG_08516 PE=3 SV=2
C1G6P2	1.01027	0.460292	908	0.000255225	0.000257847	Uncharacterized protein OS=Paracoccidioides brasiliensis (strain Pb18) OX=502780 GN=PADG_02847 PE=4 SV=2
C1GE76	1.01103	0.48344	2564	0.000122567	0.000123919	Uncharacterized protein OS=Paracoccidioides brasiliensis (strain Pb18) OX=502780 GN=PADG_05562 PE=4 SV=1
C1GN67	1.01183	0.474758	1758	0.00012297	0.000124425	Uncharacterized protein OS=Paracoccidioides brasiliensis (strain Pb18) OX=502780 GN=PADG_08703 PE=4 SV=1
C1GBG1	1.01193	0.442593	434	0.000870052	0.000880434	Aspartate-tRNA(Asn) ligase OS=Paracoccidioides brasiliensis (strain Pb18) OX=502780 GN=PADG_04962 PE=4 SV=1
C1GJ57	1.01208	0.477525	2065	0.000254784	0.000257863	Uncharacterized protein OS=Paracoccidioides brasiliensis (strain Pb18) OX=502780 GN=PADG_07293 PE=4 SV=1
C1GLK9	1.01328	0.472539	2083	0.000235462	0.000238588	Uncharacterized protein OS=Paracoccidioides brasiliensis (strain Pb18) OX=502780 GN=PADG_08250 PE=4 SV=1
C1GJD9	1.01374	0.430092	2411	0.000791013	0.000801882	Dolichyl-diphosphooligosaccharide--protein glycosyltransferase subunit WBP1 OS=Paracoccidioides brasiliensis (strain Pb18) OX=502780 GN=PADG_07375 PE=3 SV=1
C1G217	1.01391	0.43176	1612	0.000358925	0.000363919	Uncharacterized protein OS=Paracoccidioides brasiliensis (strain Pb18) OX=502780 GN=PADG_02183 PE=3 SV=1
C1G5B1	1.01417	0.474884	2516	0.000175667	0.000178156	DNA helicase OS=Paracoccidioides brasiliensis (strain Pb18) OX=502780 GN=PADG_03481 PE=3 SV=2
C1G9Z0	1.01483	0.413752	2008	0.000411008	0.000417102	Proteasome subunit beta OS=Paracoccidioides brasiliensis (strain Pb18) OX=502780 GN=PADG_04076 PE=3 SV=2
C1GBN3	1.01543	0.393292	476	0.000481608	0.000489038	Uncharacterized protein OS=Paracoccidioides brasiliensis (strain Pb18) OX=502780 GN=PADG_05034 PE=4 SV=2
C1G3W0	1.01565	0.428781	1241	0.000358497	0.000364108	Iron donor protein CyaY OS=Paracoccidioides brasiliensis (strain Pb18) OX=502780 GN=PADG_01626 PE=4 SV=1
C1G9W2	1.01744	0.418361	437	0.000646541	0.000657816	Small COPII coat GTPase sar1 OS=Paracoccidioides brasiliensis (strain Pb18) OX=502780 GN=PADG_04048 PE=3 SV=2
C1G182	1.01764	0.412316	868	0.000409602	0.000416828	ATPase GET3 OS=Paracoccidioides brasiliensis (strain Pb18) OX=502780 GN=GET3 PE=3 SV=1
C1GDY2	1.01769	0.450003	1256	0.000289182	0.000294298	U2 small nuclear ribonucleoprotein A OS=Paracoccidioides brasiliensis (strain Pb18) OX=502780 GN=PADG_05468 PE=4 SV=2
C1GDG5	1.01792	0.409086	2888	0.000936303	0.000953086	Cystathionine beta-synthase OS=Paracoccidioides brasiliensis (strain Pb18) OX=502780 GN=PADG_05301 PE=3 SV=2
C1GK66	1.01803	0.410476	2851	0.000357391	0.000363835	CAMK/CAMK1/CAMK1-CMK protein kinase OS=Paracoccidioides brasiliensis (strain Pb18) OX=502780 GN=PADG_07652 PE=3 SV=2
C1GFD9	1.01876	0.436586	1762	0.00017469	0.000177967	Uncharacterized protein OS=Paracoccidioides brasiliensis (strain Pb18) OX=502780 GN=PADG_05975 PE=4 SV=2
C1GJY1	1.01975	0.465512	2139	0.000183155	0.000186773	Uncharacterized protein OS=Paracoccidioides brasiliensis (strain Pb18) OX=502780 GN=PADG_07567 PE=4 SV=2
C1GHF4	1.01992	0.477724	694	0.000163674	0.000166935	Uncharacterized protein OS=Paracoccidioides brasiliensis (strain Pb18) OX=502780 GN=PADG_06690 PE=4 SV=2
C1GCT8	1.01998	0.416346	1451	0.000811194	0.000827398	GTP-binding nuclear protein OS=Paracoccidioides brasiliensis (strain Pb18) OX=502780 GN=PADG_04810 PE=3 SV=1
C1G4G5	1.02013	0.46501	871	0.000234191	0.000238905	Uncharacterized protein OS=Paracoccidioides brasiliensis (strain Pb18) OX=502780 GN=PADG_01831 PE=4 SV=1
C1GB47	1.02268	0.373009	2009	0.000461129	0.000471589	60S ribosomal protein L8-B OS=Paracoccidioides brasiliensis (strain Pb18) OX=502780 GN=PADG_04848 PE=4 SV=2
C1G9G2	1.02281	0.46192	566	6.09387e-05	6.23286e-05	Protein transport protein Sec61 subunit beta OS=Paracoccidioides brasiliensis (strain Pb18) OX=502780 GN=PADG_03898 PE=3 SV=1
C1GGQ3	1.02291	0.365465	1148	0.00121806	0.00124597	Uncharacterized protein OS=Paracoccidioides brasiliensis (strain Pb18) OX=502780 GN=PADG_06490 PE=4 SV=2
C1GLM2	1.02523	0.362562	24	0.0012163	0.00124698	Uncharacterized protein OS=Paracoccidioides brasiliensis (strain Pb18) OX=502780 GN=PADG_08263 PE=4 SV=2
C1GEV1	1.02525	0.359513	2879	0.000554292	0.000568289	ATP-dependent RNA helicase FAL1 OS=Paracoccidioides brasiliensis (strain Pb18) OX=502780 GN=PADG_05787 PE=3 SV=2
C1GEE1	1.02651	0.459785	1692	0.000164051	0.0001684	Uncharacterized protein OS=Paracoccidioides brasiliensis (strain Pb18) OX=502780 GN=PADG_05627 PE=4 SV=1
C1GBA9	1.02668	0.403317	143	0.000329444	0.000338233	YbgI/family dinuclear metal center protein OS=Paracoccidioides brasiliensis (strain Pb18) OX=502780 GN=PADG_04910 PE=4 SV=2
C1G686	1.02688	0.402206	1647	0.00032938	0.000338233	Eukaryotic translation initiation factor 6 OS=Paracoccidioides brasiliensis (strain Pb18) OX=502780 GN=TIF6 PE=3 SV=2
C1GAS0	1.02734	0.411177	72	0.00053561	0.000550253	Uncharacterized protein OS=Paracoccidioides brasiliensis (strain Pb18) OX=502780 GN=PADG_04356 PE=3 SV=1
C1GCG3	1.02784	0.38953	873	0.000450329	0.000462866	Uncharacterized protein OS=Paracoccidioides brasiliensis (strain Pb18) OX=502780 GN=PADG_04685 PE=4 SV=1
C1GIU8	1.02853	0.424851	2477	0.000267309	0.000274936	Uncharacterized protein OS=Paracoccidioides brasiliensis (strain Pb18) OX=502780 GN=PADG_07184 PE=4 SV=2
C1G6M3	1.02926	0.394045	848	0.000431449	0.000444074	Ribosomal protein OS=Paracoccidioides brasiliensis (strain Pb18) OX=502780 GN=PADG_02828 PE=3 SV=1
C1G256	1.02979	0.421063	1677	0.000163711	0.000168589	NADH dehydrogenase [ubiquinone] 1 alpha subcomplex subunit OS=Paracoccidioides brasiliensis (strain Pb18) OX=502780 GN=PADG_02222 PE=3 SV=2
C1G133	1.03012	0.454616	2563	0.000103687	0.00010681	Uncharacterized protein OS=Paracoccidioides brasiliensis (strain Pb18) OX=502780 GN=PADG_00573 PE=4 SV=1
A0A0A0HXV1	1.03036	0.434828	529	0.000284707	0.000293349	AP complex subunit beta OS=Paracoccidioides brasiliensis (strain Pb18) OX=502780 GN=PADG_11728 PE=3 SV=1
C1G164	1.03048	0.238256	2001	0.00076845	0.000791872	Phosphoacetylglucosamine mutase OS=Paracoccidioides brasiliensis (strain Pb18) OX=502780 GN=PADG_00604 PE=3 SV=2
C1GMU3	1.03077	0.395354	2860	0.000336478	0.000346829	Peptidylprolyl isomerase OS=Paracoccidioides brasiliensis (strain Pb18) OX=502780 GN=PADG_08587 PE=4 SV=1
C1GA13	1.03084	0.269144	394	0.00131219	0.00135265	Phosphoribosylaminoimidazolecarboxamide formyltransferase/IMP cyclohydrolase OS=Paracoccidioides brasiliensis (strain Pb18) OX=502780 GN=PADG_04099 PE=3 SV=1
C1FYQ2	1.03127	0.304401	2889	0.0008521	0.000878748	T-complex protein 1 subunit gamma OS=Paracoccidioides brasiliensis (strain Pb18) OX=502780 GN=PADG_00928 PE=3 SV=1
C1GLI9	1.03219	0.24645	1455	0.00307497	0.00317394	Elongation factor 2 OS=Paracoccidioides brasiliensis (strain Pb18) OX=502780 GN=PADG_08125 PE=4 SV=2
C1G3N9	1.03232	0.449757	1672	0.000223934	0.000231173	Sorting nexin-4 OS=Paracoccidioides brasiliensis (strain Pb18) OX=502780 GN=PADG_01555 PE=4 SV=2
A0A0A0HWP2	1.03244	0.42104	2500	5.13289e-05	5.29938e-05	Uncharacterized protein OS=Paracoccidioides brasiliensis (strain Pb18) OX=502780 GN=PADG_12126 PE=4 SV=1
C1GCP2	1.03244	0.435673	531	0.000164169	0.000169495	Uncharacterized protein OS=Paracoccidioides brasiliensis (strain Pb18) OX=502780 GN=PADG_04764 PE=3 SV=2
C1GJS7	1.03246	0.401186	1389	0.000112268	0.000115912	Uncharacterized protein OS=Paracoccidioides brasiliensis (strain Pb18) OX=502780 GN=PADG_07513 PE=3 SV=1
C1G570	1.03256	0.32921	1997	0.000843224	0.000870676	Proline-tRNA ligase OS=Paracoccidioides brasiliensis (strain Pb18) OX=502780 GN=PADG_03440 PE=3 SV=2
C1G454	1.03297	0.444481	1812	5.16086e-05	5.33102e-05	Di-trans,poly-cis-decaprenylcistransferase OS=Paracoccidioides brasiliensis (strain Pb18) OX=502780 GN=PADG_01720 PE=3 SV=2
C1G1P5	1.03381	0.411851	1289	0.00030899	0.000319438	Ribosomal protein S15 OS=Paracoccidioides brasiliensis (strain Pb18) OX=502780 GN=PADG_00785 PE=4 SV=1
C1GEJ7	1.03397	0.281189	2375	0.00208879	0.00215974	Cell division control protein 48 OS=Paracoccidioides brasiliensis (strain Pb18) OX=502780 GN=PADG_05683 PE=3 SV=1
C1GBA4	1.03416	0.429769	2216	0.000137531	0.000142229	Uncharacterized protein OS=Paracoccidioides brasiliensis (strain Pb18) OX=502780 GN=PADG_04905 PE=4 SV=2
C1GAN3	1.03466	0.445582	183	0.000163858	0.000169537	V-type ATPase, G subunit OS=Paracoccidioides brasiliensis (strain Pb18) OX=502780 GN=PADG_04319 PE=4 SV=2
C1G2X0	1.03483	0.285177	1837	0.000756667	0.000783022	Uncharacterized protein OS=Paracoccidioides brasiliensis (strain Pb18) OX=502780 GN=PADG_01286 PE=4 SV=1
C1GDE1	1.03484	0.352639	778	0.00149266	0.00154466	Serine hydroxymethyltransferase OS=Paracoccidioides brasiliensis (strain Pb18) OX=502780 GN=PADG_05277 PE=3 SV=1
C1G9E2	1.03508	0.432403	2856	0.000264783	0.000274071	NADH-ubiquinone oxidoreductase 19.3 kDa subunit, mitochondrial OS=Paracoccidioides brasiliensis (strain Pb18) OX=502780 GN=PADG_03878 PE=3 SV=2
C1G3K0	1.03512	0.426391	2755	0.000149796	0.000155056	Uncharacterized protein OS=Paracoccidioides brasiliensis (strain Pb18) OX=502780 GN=PADG_01516 PE=4 SV=2
C1G5H3	1.03534	0.262554	1947	0.000729045	0.000754808	Uncharacterized protein OS=Paracoccidioides brasiliensis (strain Pb18) OX=502780 GN=PADG_02428 PE=4 SV=2
C1G154	1.03634	0.444379	935	0.000153936	0.00015953	Uncharacterized protein OS=Paracoccidioides brasiliensis (strain Pb18) OX=502780 GN=PADG_00594 PE=4 SV=1
C1G9P8	1.0366	0.262213	2374	0.00203338	0.0021078	Glutamine-fructose-6-phosphate transaminase (Isomerizing) OS=Paracoccidioides brasiliensis (strain Pb18) OX=502780 GN=PADG_03984 PE=4 SV=2
A0A0A0HWR8	1.03762	0.426824	2349	0.000341442	0.000354288	Ribokinase OS=Paracoccidioides brasiliensis (strain Pb18) OX=502780 GN=PADG_11977 PE=3 SV=1
C1GCI7	1.03766	0.225812	1054	0.00125132	0.00129844	Isocitrate lyase OS=Paracoccidioides brasiliensis (strain Pb18) OX=502780 GN=PADG_04709 PE=3 SV=2
C1G2Y9	1.03777	0.36474	1594	0.000471423	0.000489227	Argininosuccinate lyase OS=Paracoccidioides brasiliensis (strain Pb18) OX=502780 GN=PADG_01305 PE=3 SV=2
C1G440	1.0378	0.280456	1182	0.000668106	0.000693363	Uncharacterized protein OS=Paracoccidioides brasiliensis (strain Pb18) OX=502780 GN=PADG_01706 PE=3 SV=1
C1GKM2	1.03798	0.346636	2350	0.000411034	0.000426646	Uncharacterized protein OS=Paracoccidioides brasiliensis (strain Pb18) OX=502780 GN=PADG_07808 PE=3 SV=1
C1GLR4	1.03806	0.401709	558	0.000205379	0.000213196	Uncharacterized protein OS=Paracoccidioides brasiliensis (strain Pb18) OX=502780 GN=PADG_08305 PE=4 SV=2
C1G6E0	1.03919	0.35041	2836	0.000350132	0.000363855	Uncharacterized protein OS=Paracoccidioides brasiliensis (strain Pb18) OX=502780 GN=PADG_02745 PE=4 SV=1
C1G0N4	1.0393	0.384934	1603	0.000530635	0.000551492	Uncharacterized protein OS=Paracoccidioides brasiliensis (strain Pb18) OX=502780 GN=PADG_00424 PE=4 SV=2
C1GH02	1.03976	0.381347	2437	0.00041035	0.000426666	Formate dehydrogenase OS=Paracoccidioides brasiliensis (strain Pb18) OX=502780 GN=PADG_06221 PE=3 SV=2
C1G0Q9	1.04181	0.347977	2874	0.000306881	0.000319711	Uncharacterized protein OS=Paracoccidioides brasiliensis (strain Pb18) OX=502780 GN=PADG_00449 PE=4 SV=2
A0A0A0HU09	1.04212	0.262001	1563	0.00102371	0.00106683	Uncharacterized protein OS=Paracoccidioides brasiliensis (strain Pb18) OX=502780 GN=PADG_11652 PE=4 SV=1
C1GF36	1.04268	0.409617	655	5.13289e-05	5.35197e-05	GDP-mannose transporter OS=Paracoccidioides brasiliensis (strain Pb18) OX=502780 GN=PADG_05872 PE=4 SV=1
C1G8C8	1.04277	0.358608	2441	0.000502043	0.000523515	2-oxoisovalerate dehydrogenase subunit alpha OS=Paracoccidioides brasiliensis (strain Pb18) OX=502780 GN=PADG_03514 PE=3 SV=2
C1GCV9	1.04292	0.278821	479	0.000512208	0.000534195	Uncharacterized protein OS=Paracoccidioides brasiliensis (strain Pb18) OX=502780 GN=PADG_05095 PE=4 SV=1
C1GA74	1.04316	0.38311	515	0.000494561	0.000515907	Uncharacterized protein OS=Paracoccidioides brasiliensis (strain Pb18) OX=502780 GN=PADG_04160 PE=4 SV=1
C1G892	1.04334	0.382297	855	0.000391961	0.000408948	DNA-directed RNA polymerase OS=Paracoccidioides brasiliensis (strain Pb18) OX=502780 GN=PADG_03397 PE=3 SV=1
C1GHM0	1.04345	0.330034	13	0.00164558	0.00171708	Histidine biosynthesis trifunctional protein OS=Paracoccidioides brasiliensis (strain Pb18) OX=502780 GN=PADG_06756 PE=3 SV=1
C1GG12	1.04351	0.247258	18	0.00138169	0.00144181	Glutamine-tRNA ligase OS=Paracoccidioides brasiliensis (strain Pb18) OX=502780 GN=PADG_06249 PE=3 SV=1
C1G318	1.04352	0.408793	580	5.13289e-05	5.35628e-05	Uncharacterized protein OS=Paracoccidioides brasiliensis (strain Pb18) OX=502780 GN=PADG_01334 PE=4 SV=1
A0A0A0HU99	1.04375	0.452618	2155	0.000102333	0.000106809	Uncharacterized protein OS=Paracoccidioides brasiliensis (strain Pb18) OX=502780 GN=PADG_11886 PE=4 SV=1
C1G5C9	1.04401	0.387934	518	0.000195329	0.000203925	Uncharacterized protein OS=Paracoccidioides brasiliensis (strain Pb18) OX=502780 GN=PADG_03499 PE=4 SV=2
C1GCX5	1.04465	0.279711	1544	0.00102225	0.0010679	Serine hydroxymethyltransferase OS=Paracoccidioides brasiliensis (strain Pb18) OX=502780 GN=PADG_05111 PE=3 SV=1
C1G208	1.04515	0.41655	623	0.000256043	0.000267604	Geranylgeranyl pyrophosphate synthase OS=Paracoccidioides brasiliensis (strain Pb18) OX=502780 GN=PADG_02174 PE=3 SV=1
C1GI15	1.04536	0.394084	125	0.000340005	0.000355429	Uncharacterized protein OS=Paracoccidioides brasiliensis (strain Pb18) OX=502780 GN=PADG_06901 PE=4 SV=1
C1G965	1.04636	0.414818	976	5.11896e-05	5.35628e-05	Uncharacterized protein OS=Paracoccidioides brasiliensis (strain Pb18) OX=502780 GN=PADG_03801 PE=4 SV=2
C1G571	1.04643	0.214606	427	0.000790622	0.000827334	T-complex protein 1 subunit alpha OS=Paracoccidioides brasiliensis (strain Pb18) OX=502780 GN=PADG_03441 PE=3 SV=1
C1G7G0	1.04656	0.460263	573	0.000145426	0.000152196	Uncharacterized protein OS=Paracoccidioides brasiliensis (strain Pb18) OX=502780 GN=PADG_03115 PE=4 SV=1
C1G0X0	1.04672	0.383792	238	0.000195105	0.000204221	Vacuolar membrane protease OS=Paracoccidioides brasiliensis (strain Pb18) OX=502780 GN=PADG_00510 PE=3 SV=1
C1GIQ3	1.04677	0.404624	1763	0.000144428	0.000151184	Uncharacterized protein OS=Paracoccidioides brasiliensis (strain Pb18) OX=502780 GN=PADG_07139 PE=4 SV=1
C1GHV0	1.0471	0.426166	1386	0.000152958	0.000160162	Uncharacterized protein OS=Paracoccidioides brasiliensis (strain Pb18) OX=502780 GN=PADG_06836 PE=4 SV=1
A0A0A0HWQ9	1.04712	0.255174	411	0.000891541	0.000933552	NADH-ubiquinone oxidoreductase 78 kDa subunit, mitochondrial OS=Paracoccidioides brasiliensis (strain Pb18) OX=502780 GN=PADG_12148 PE=3 SV=1
C1GMZ1	1.04751	0.201338	1543	0.00181702	0.00190335	Peroxisomal hydratase-dehydrogenase-epimerase OS=Paracoccidioides brasiliensis (strain Pb18) OX=502780 GN=PADG_08651 PE=4 SV=1
C1GCS3	1.04916	0.347891	2423	0.000574555	0.000602799	Uncharacterized protein OS=Paracoccidioides brasiliensis (strain Pb18) OX=502780 GN=PADG_04795 PE=4 SV=1
C1G186	1.04921	0.290618	70	0.000532836	0.000559057	Eukaryotic translation initiation factor 3 subunit E OS=Paracoccidioides brasiliensis (strain Pb18) OX=502780 GN=INT6 PE=3 SV=2
C1GLF6	1.04951	0.322229	2403	0.00112706	0.00118287	L-aminoadipate-semialdehyde dehydrogenase OS=Paracoccidioides brasiliensis (strain Pb18) OX=502780 GN=PADG_08092 PE=4 SV=1
C1GJH8	1.04951	0.275112	2003	0.000728771	0.000764856	Uncharacterized protein OS=Paracoccidioides brasiliensis (strain Pb18) OX=502780 GN=PADG_07414 PE=4 SV=1
C1G9R6	1.04952	0.364705	1668	0.000143609	0.000150721	Uncharacterized protein OS=Paracoccidioides brasiliensis (strain Pb18) OX=502780 GN=PADG_04002 PE=4 SV=1
C1G1V9	1.05037	0.35887	2861	0.000379468	0.000398582	Uncharacterized protein OS=Paracoccidioides brasiliensis (strain Pb18) OX=502780 GN=PADG_02125 PE=3 SV=1
C1GLM9	1.05051	0.399965	2741	0.000186159	0.000195562	Uncharacterized protein OS=Paracoccidioides brasiliensis (strain Pb18) OX=502780 GN=PADG_08270 PE=4 SV=1
C1GJT7	1.05117	0.189389	2379	0.00169301	0.00177964	Uncharacterized protein OS=Paracoccidioides brasiliensis (strain Pb18) OX=502780 GN=PADG_07523 PE=3 SV=1
C1GJ83	1.05154	0.285994	2032	0.000388963	0.000409008	Uncharacterized protein OS=Paracoccidioides brasiliensis (strain Pb18) OX=502780 GN=PADG_07319 PE=3 SV=2
C1GK32	1.05223	0.32148	1835	0.000716937	0.000754386	Uncharacterized protein OS=Paracoccidioides brasiliensis (strain Pb18) OX=502780 GN=PADG_07618 PE=4 SV=2
C1G3A8	1.05241	0.269939	471	0.000430567	0.000453132	Uncharacterized protein OS=Paracoccidioides brasiliensis (strain Pb18) OX=502780 GN=PADG_01424 PE=4 SV=2
C1G064	1.05264	0.0921433	1536	0.00397323	0.00418239	Fatty acid synthase subunit alpha OS=Paracoccidioides brasiliensis (strain Pb18) OX=502780 GN=PADG_00254 PE=3 SV=2
C1G0J8	1.05362	0.406803	2501	0.000194249	0.000204664	Uncharacterized protein OS=Paracoccidioides brasiliensis (strain Pb18) OX=502780 GN=PADG_00388 PE=4 SV=1
C1GLS6	1.05364	0.407721	612	0.000193745	0.000204138	Uncharacterized protein OS=Paracoccidioides brasiliensis (strain Pb18) OX=502780 GN=PADG_08317 PE=4 SV=1
C1GAF5	1.05395	0.21144	1985	0.00128138	0.00135051	Coatomer subunit alpha OS=Paracoccidioides brasiliensis (strain Pb18) OX=502780 GN=PADG_04241 PE=4 SV=2
C1G4J8	1.05402	0.248485	1996	0.00080206	0.000845391	Kynurenine formamidase OS=Paracoccidioides brasiliensis (strain Pb18) OX=502780 GN=PADG_01864 PE=3 SV=1
C1G3P2	1.05409	0.22716	1560	0.00102859	0.00108423	Uncharacterized protein OS=Paracoccidioides brasiliensis (strain Pb18) OX=502780 GN=PADG_01558 PE=3 SV=2
C1GK28	1.05427	0.404482	970	0.000245252	0.000258562	Uncharacterized protein OS=Paracoccidioides brasiliensis (strain Pb18) OX=502780 GN=PADG_07614 PE=4 SV=2
C1FZZ7	1.05428	0.295426	826	0.000429262	0.000452564	Uncharacterized protein OS=Paracoccidioides brasiliensis (strain Pb18) OX=502780 GN=PADG_00187 PE=4 SV=1
C1GAT1	1.0545	0.171162	2401	0.000809576	0.000853694	Uncharacterized protein OS=Paracoccidioides brasiliensis (strain Pb18) OX=502780 GN=PADG_04367 PE=4 SV=2
C1G4R8	1.05454	0.41543	2163	0.000152139	0.000160436	Uncharacterized protein OS=Paracoccidioides brasiliensis (strain Pb18) OX=502780 GN=PADG_01934 PE=4 SV=2
C1GKE7	1.05499	0.20108	2834	0.000818923	0.000863954	Arp2/3 complex 34 kDa subunit OS=Paracoccidioides brasiliensis (strain Pb18) OX=502780 GN=PADG_07733 PE=3 SV=1
C1GKQ0	1.05505	0.0301181	1153	0.00113814	0.0012008	Uncharacterized protein OS=Paracoccidioides brasiliensis (strain Pb18) OX=502780 GN=PADG_07907 PE=3 SV=2
C1G541	1.05612	0.229983	55	0.000789595	0.00083391	T-complex protein 1 subunit theta OS=Paracoccidioides brasiliensis (strain Pb18) OX=502780 GN=PADG_02057 PE=3 SV=2
C1GFV7	1.05702	0.275099	852	0.000369904	0.000390994	Uncharacterized protein OS=Paracoccidioides brasiliensis (strain Pb18) OX=502780 GN=PADG_06143 PE=4 SV=2
C1G741	1.05729	0.303405	1636	0.00032752	0.000346283	Uncharacterized protein OS=Paracoccidioides brasiliensis (strain Pb18) OX=502780 GN=PADG_02996 PE=4 SV=2
C1G020	1.05788	0.198399	1053	0.00143782	0.00152103	Glycine cleavage system P protein OS=Paracoccidioides brasiliensis (strain Pb18) OX=502780 GN=PADG_00210 PE=3 SV=2
C1G2Q1	1.05813	0.42214	215	0.000134973	0.000142818	Uncharacterized protein OS=Paracoccidioides brasiliensis (strain Pb18) OX=502780 GN=PADG_01217 PE=4 SV=2
C1GL41	1.05848	0.24264	1840	0.000881701	0.000933259	T-complex protein 1 subunit beta OS=Paracoccidioides brasiliensis (strain Pb18) OX=502780 GN=PADG_08048 PE=3 SV=2
C1G0S3	1.05868	0.35539	2458	0.000268114	0.000283848	Uncharacterized protein OS=Paracoccidioides brasiliensis (strain Pb18) OX=502780 GN=PADG_00463 PE=4 SV=1
C1G2T1	1.05942	0.393397	2204	7.56383e-05	8.01327e-05	DNA replication complex GINS protein PSF2 OS=Paracoccidioides brasiliensis (strain Pb18) OX=502780 GN=PADG_01247 PE=3 SV=1
C1GKX0	1.06112	0.249274	1617	0.000317859	0.000337285	Eukaryotic translation initiation factor 1A, Y-chromosomal OS=Paracoccidioides brasiliensis (strain Pb18) OX=502780 GN=PADG_07977 PE=3 SV=1
C1GK68	1.06132	0.236977	2427	0.000678118	0.000719703	NADH-ubiquinone oxidoreductase 49 kDa subunit, mitochondrial OS=Paracoccidioides brasiliensis (strain Pb18) OX=502780 GN=PADG_07654 PE=3 SV=1
C1G6K0	1.06167	0.125132	1983	0.00109647	0.00116409	Isocitrate dehydrogenase [NAD] subunit, mitochondrial OS=Paracoccidioides brasiliensis (strain Pb18) OX=502780 GN=PADG_02805 PE=3 SV=2
C1GHU8	1.06221	0.288646	1845	0.000737454	0.000783332	2-isopropylmalate synthase OS=Paracoccidioides brasiliensis (strain Pb18) OX=502780 GN=PADG_06834 PE=3 SV=2
C1G681	1.06388	0.387401	2712	0.00030998	0.000329781	Protein hob3 OS=Paracoccidioides brasiliensis (strain Pb18) OX=502780 GN=PADG_02686 PE=4 SV=2
Q1XA95	1.06473	0.298901	659	0.000133623	0.000142272	Ribosomal protein OS=Paracoccidioides brasiliensis (strain Pb18) OX=502780 GN=rms5 PE=4 SV=1
C1GLI3	1.06624	0.238013	432	0.000791786	0.000844233	Fumarate hydratase, mitochondrial OS=Paracoccidioides brasiliensis (strain Pb18) OX=502780 GN=PADG_08119 PE=3 SV=2
C1GD57	1.06627	0.140373	1989	0.00102559	0.00109355	Probable Xaa-Pro aminopeptidase PEPP OS=Paracoccidioides brasiliensis (strain Pb18) OX=502780 GN=PEPP PE=3 SV=1
C1FZF4	1.06629	0.355088	1020	0.000175379	0.000187006	Uncharacterized protein OS=Paracoccidioides brasiliensis (strain Pb18) OX=502780 GN=PADG_01180 PE=4 SV=2
C1G5B6	1.0668	0.290929	2329	0.000349781	0.000373147	Uncharacterized protein OS=Paracoccidioides brasiliensis (strain Pb18) OX=502780 GN=PADG_03486 PE=4 SV=2
C1GLH5	1.06692	0.368682	1324	0.000216946	0.000231464	Mitochondrial GTP/GDP carrier protein 1 OS=Paracoccidioides brasiliensis (strain Pb18) OX=502780 GN=PADG_08111 PE=3 SV=2
C1G098	1.06731	0.276506	1253	0.000357946	0.000382039	Uncharacterized protein OS=Paracoccidioides brasiliensis (strain Pb18) OX=502780 GN=PADG_00288 PE=4 SV=1
C1GE97	1.06834	0.443707	1168	0.000143292	0.000153084	Uncharacterized protein OS=Paracoccidioides brasiliensis (strain Pb18) OX=502780 GN=PADG_05583 PE=4 SV=2
C1GG23	1.06839	0.432946	2530	9.09196e-05	9.71379e-05	Uncharacterized protein OS=Paracoccidioides brasiliensis (strain Pb18) OX=502780 GN=PADG_06260 PE=4 SV=2
C1GE06	1.06873	0.0878505	455	0.00057346	0.000612873	Uncharacterized protein OS=Paracoccidioides brasiliensis (strain Pb18) OX=502780 GN=PADG_05492 PE=3 SV=2
C1G6W9	1.06913	0.239315	472	0.000533552	0.000570436	Uncharacterized protein OS=Paracoccidioides brasiliensis (strain Pb18) OX=502780 GN=PADG_02924 PE=4 SV=1
C1GBT4	1.07186	0.159232	803	0.00100464	0.00107683	Multifunctional fusion protein OS=Paracoccidioides brasiliensis (strain Pb18) OX=502780 GN=PADG_05085 PE=3 SV=1
C1G736	1.07224	0.0168966	2858	0.000779492	0.000835804	Acyl-coenzyme A oxidase OS=Paracoccidioides brasiliensis (strain Pb18) OX=502780 GN=PADG_02991 PE=3 SV=2
C1FYK2	1.07305	0.113505	397	0.00138325	0.00148429	Isoleucine-tRNA ligase OS=Paracoccidioides brasiliensis (strain Pb18) OX=502780 GN=PADG_00878 PE=3 SV=1
C1G373	1.07458	0.211052	1966	0.00063479	0.000682134	Eukaryotic translation initiation factor 3 subunit C OS=Paracoccidioides brasiliensis (strain Pb18) OX=502780 GN=NIP1 PE=3 SV=1
C1G3V5	1.07495	0.0683442	1988	0.00124874	0.00134233	Aspartate aminotransferase OS=Paracoccidioides brasiliensis (strain Pb18) OX=502780 GN=PADG_01621 PE=4 SV=1
C1GB99	1.07514	0.21555	76	0.00055481	0.0005965	Trehalose-6-phosphate synthase OS=Paracoccidioides brasiliensis (strain Pb18) OX=502780 GN=PADG_04900 PE=3 SV=1
C1GMI6	1.07697	0.193458	419	0.000800527	0.000862141	Lysine--tRNA ligase OS=Paracoccidioides brasiliensis (strain Pb18) OX=502780 GN=PADG_08472 PE=3 SV=2
C1G0C3	1.07798	0.241481	2467	0.000296682	0.000319816	Uncharacterized protein OS=Paracoccidioides brasiliensis (strain Pb18) OX=502780 GN=PADG_00313 PE=4 SV=2
A0A0A0HTI3	1.07828	0.406733	1061	9.31629e-05	0.000100456	Uncharacterized protein OS=Paracoccidioides brasiliensis (strain Pb18) OX=502780 GN=PADG_12307 PE=4 SV=1
C1G3Y0	1.07892	0.186082	2015	0.000584567	0.0006307	RuvB-like helicase OS=Paracoccidioides brasiliensis (strain Pb18) OX=502780 GN=PADG_01646 PE=3 SV=1
C1G648	1.07913	0.361455	1681	0.000246848	0.00026638	Uncharacterized protein OS=Paracoccidioides brasiliensis (strain Pb18) OX=502780 GN=PADG_02653 PE=4 SV=1
C1GC91	1.08039	0.224152	2040	0.000287986	0.000311137	Uncharacterized protein OS=Paracoccidioides brasiliensis (strain Pb18) OX=502780 GN=PADG_04613 PE=4 SV=1
C1G0G2	1.0807	0.192885	2431	0.000757537	0.000818673	Uncharacterized protein OS=Paracoccidioides brasiliensis (strain Pb18) OX=502780 GN=PADG_00352 PE=4 SV=1
C1GJD0	1.08071	0.171931	2014	0.000452516	0.000489038	Uncharacterized protein OS=Paracoccidioides brasiliensis (strain Pb18) OX=502780 GN=PADG_07366 PE=4 SV=2
C1GFQ7	1.08144	0.310452	1303	0.000246279	0.000266337	Uncharacterized protein OS=Paracoccidioides brasiliensis (strain Pb18) OX=502780 GN=PADG_06093 PE=4 SV=1
C1FYR0	1.08163	0.350763	2743	0.000122593	0.000132601	Uncharacterized protein OS=Paracoccidioides brasiliensis (strain Pb18) OX=502780 GN=PADG_00936 PE=4 SV=2
C1G380	1.0817	0.377221	2586	8.22426e-05	8.89619e-05	Uncharacterized protein OS=Paracoccidioides brasiliensis (strain Pb18) OX=502780 GN=PADG_01396 PE=4 SV=1
C1G6U4	1.0828	0.137295	458	0.00049173	0.000532444	Uncharacterized protein OS=Paracoccidioides brasiliensis (strain Pb18) OX=502780 GN=PADG_02899 PE=4 SV=2
C1G9S7	1.08283	0.389433	2475	0.000164953	0.000178616	Uncharacterized protein OS=Paracoccidioides brasiliensis (strain Pb18) OX=502780 GN=PADG_04013 PE=4 SV=1
C1GHD5	1.0829	0.0354912	1538	0.00234724	0.00254182	3-isopropylmalate dehydrogenase OS=Paracoccidioides brasiliensis (strain Pb18) OX=502780 GN=PADG_06671 PE=3 SV=1
C1GBI8	1.0829	0.18082	1173	0.000583288	0.000631645	Ribose 5-phosphate isomerase A OS=Paracoccidioides brasiliensis (strain Pb18) OX=502780 GN=PADG_04989 PE=4 SV=1
C1G4B3	1.08326	0.250538	2928	0.000360458	0.000390468	Uncharacterized protein OS=Paracoccidioides brasiliensis (strain Pb18) OX=502780 GN=PADG_01779 PE=3 SV=1
C1G167	1.08346	0.178535	510	0.000328185	0.000355574	Riboflavin synthase, alpha subunit OS=Paracoccidioides brasiliensis (strain Pb18) OX=502780 GN=PADG_00607 PE=4 SV=2
C1GA39	1.08394	0.183467	2868	0.000483027	0.000523572	Mitochondrial presequence protease OS=Paracoccidioides brasiliensis (strain Pb18) OX=502780 GN=PADG_04125 PE=4 SV=1
C1G3Y3	1.08523	0.154624	2724	0.000204939	0.000222405	Uncharacterized protein OS=Paracoccidioides brasiliensis (strain Pb18) OX=502780 GN=PADG_01649 PE=4 SV=1
C1GB61	1.08609	0.367955	974	0.000102196	0.000110994	Uncharacterized protein OS=Paracoccidioides brasiliensis (strain Pb18) OX=502780 GN=PADG_04862 PE=4 SV=2
A0A0A0HY23	1.087	0.0729762	1941	0.000646572	0.000702825	Uncharacterized protein OS=Paracoccidioides brasiliensis (strain Pb18) OX=502780 GN=PADG_11424 PE=4 SV=1
C1FZQ1	1.08779	0.383496	1822	0.000139989	0.000152278	Transcriptional activator hap2 OS=Paracoccidioides brasiliensis (strain Pb18) OX=502780 GN=PADG_00091 PE=4 SV=1
C1GHK4	1.08816	0.0707189	1539	0.0017643	0.00191985	Uncharacterized protein OS=Paracoccidioides brasiliensis (strain Pb18) OX=502780 GN=PADG_06740 PE=3 SV=1
A0A0A0HUM5	1.08824	0.00330739	2372	0.00241914	0.0026326	Aconitate hydratase, mitochondrial OS=Paracoccidioides brasiliensis (strain Pb18) OX=502780 GN=PADG_11845 PE=3 SV=1
C1GMX9	1.08837	0.397396	2573	0.000137616	0.000149777	Uncharacterized protein OS=Paracoccidioides brasiliensis (strain Pb18) OX=502780 GN=PADG_08630 PE=4 SV=1
C1GBE8	1.08962	0.171476	2871	0.000717883	0.000782222	Threonine-tRNA ligase OS=Paracoccidioides brasiliensis (strain Pb18) OX=502780 GN=PADG_04949 PE=3 SV=2
C1GKC8	1.08993	0.138748	449	0.000531313	0.000579095	Uncharacterized protein OS=Paracoccidioides brasiliensis (strain Pb18) OX=502780 GN=PADG_07714 PE=4 SV=2
C1G1H9	1.09101	0.152389	490	0.000439901	0.000479935	Uncharacterized protein OS=Paracoccidioides brasiliensis (strain Pb18) OX=502780 GN=PADG_00719 PE=4 SV=2
C1GCN2	1.09186	0.175671	2906	0.000626074	0.000683587	Uncharacterized protein OS=Paracoccidioides brasiliensis (strain Pb18) OX=502780 GN=PADG_04754 PE=4 SV=1
C1G2J3	1.09218	0.202471	508	0.000316976	0.000346197	Uncharacterized protein OS=Paracoccidioides brasiliensis (strain Pb18) OX=502780 GN=PADG_02359 PE=3 SV=1
C1G532	1.09284	0.194765	1231	0.000421385	0.000460508	Uncharacterized protein OS=Paracoccidioides brasiliensis (strain Pb18) OX=502780 GN=PADG_02048 PE=4 SV=2
C1G8E0	1.09441	0.0339228	1549	0.00141505	0.00154864	Uncharacterized protein OS=Paracoccidioides brasiliensis (strain Pb18) OX=502780 GN=PADG_03526 PE=4 SV=1
C1GDR7	1.09444	0.31234	1626	0.000275372	0.000301379	Uncharacterized protein OS=Paracoccidioides brasiliensis (strain Pb18) OX=502780 GN=PADG_05403 PE=4 SV=1
C1GFB1	1.09445	0.125029	2447	0.000552898	0.000605118	Nicotinate-nucleotide pyrophosphorylase [carboxylating] OS=Paracoccidioides brasiliensis (strain Pb18) OX=502780 GN=PADG_05947 PE=3 SV=1
C1GGP9	1.09476	0.38267	949	0.000153036	0.000167538	Uncharacterized protein OS=Paracoccidioides brasiliensis (strain Pb18) OX=502780 GN=PADG_06486 PE=4 SV=2
C1G8V9	1.09534	0.408527	2726	0.000113576	0.000124404	Beta-hexosaminidase OS=Paracoccidioides brasiliensis (strain Pb18) OX=502780 GN=PADG_03695 PE=3 SV=1
C1GAY4	1.09535	0.089774	1200	0.00047157	0.000516536	Peptide-methionine (S)-S-oxide reductase OS=Paracoccidioides brasiliensis (strain Pb18) OX=502780 GN=PADG_04420 PE=3 SV=2
C1GCJ3	1.09696	0.124474	2840	0.000801077	0.00087875	Uncharacterized protein OS=Paracoccidioides brasiliensis (strain Pb18) OX=502780 GN=PADG_04715 PE=4 SV=2
C1GDI5	1.09765	0.163386	462	0.000503354	0.000552505	Uncharacterized protein OS=Paracoccidioides brasiliensis (strain Pb18) OX=502780 GN=PADG_05321 PE=4 SV=1
C1GIA7	1.09773	0.35862	653	0.000112811	0.000123835	Phenylalanine-tRNA ligase OS=Paracoccidioides brasiliensis (strain Pb18) OX=502780 GN=PADG_06993 PE=4 SV=1
C1GD54	1.09826	0.359662	265	0.000104833	0.000115133	Uncharacterized protein OS=Paracoccidioides brasiliensis (strain Pb18) OX=502780 GN=PADG_05190 PE=4 SV=2
A0A0A0HTI2	1.09914	0.179124	2340	0.000389449	0.000428057	Uncharacterized protein OS=Paracoccidioides brasiliensis (strain Pb18) OX=502780 GN=PADG_11352 PE=4 SV=1
C1GIB2	1.10179	0.121184	1456	0.00104698	0.00115355	Protein transporter SEC31 OS=Paracoccidioides brasiliensis (strain Pb18) OX=502780 GN=PADG_06998 PE=4 SV=2
C1GBX3	1.10207	0.0551378	1158	0.000831562	0.000916442	Uncharacterized protein OS=Paracoccidioides brasiliensis (strain Pb18) OX=502780 GN=PADG_04495 PE=4 SV=1
C1GHW5	1.10384	0.200847	2064	0.000266594	0.000294278	Uncharacterized protein OS=Paracoccidioides brasiliensis (strain Pb18) OX=502780 GN=PADG_06851 PE=4 SV=1
A0A0A0HTY8	1.10445	0.124105	423	0.000707235	0.000781103	Nucleolar protein 58 OS=Paracoccidioides brasiliensis (strain Pb18) OX=502780 GN=PADG_12196 PE=4 SV=1
C1GHX5	1.10468	0.215171	134	0.00022584	0.00024948	Uncharacterized protein OS=Paracoccidioides brasiliensis (strain Pb18) OX=502780 GN=PADG_06861 PE=4 SV=1
C1G452	1.10505	0.111055	1151	0.00110204	0.0012178	Saccharopine dehydrogenase [NADP+, L-glutamate-forming] OS=Paracoccidioides brasiliensis (strain Pb18) OX=502780 GN=PADG_01718 PE=4 SV=1
C1GAL5	1.10531	0.194457	1369	0.000153271	0.000169411	Uncharacterized protein OS=Paracoccidioides brasiliensis (strain Pb18) OX=502780 GN=PADG_04301 PE=4 SV=2
C1GIR6	1.10531	0.221854	523	0.000265993	0.000294004	Uncharacterized protein OS=Paracoccidioides brasiliensis (strain Pb18) OX=502780 GN=PADG_07152 PE=4 SV=2
A0A0A0HV62	1.10536	0.0805449	2387	0.00145751	0.00161107	Ribosomal protein L19 OS=Paracoccidioides brasiliensis (strain Pb18) OX=502780 GN=PADG_11904 PE=3 SV=1
C1G240	1.10598	0.256355	117	0.000513927	0.000568391	Uncharacterized protein OS=Paracoccidioides brasiliensis (strain Pb18) OX=502780 GN=PADG_02206 PE=4 SV=1
C1G1S9	1.1063	0.303493	964	0.000120393	0.00013319	Uncharacterized protein OS=Paracoccidioides brasiliensis (strain Pb18) OX=502780 GN=PADG_02095 PE=4 SV=2
C1G4A7	1.10642	0.314726	2473	0.000112153	0.000124088	Uncharacterized protein OS=Paracoccidioides brasiliensis (strain Pb18) OX=502780 GN=PADG_01773 PE=4 SV=2
C1GH40	1.10769	0.275224	583	0.000179023	0.000198303	Endoribonuclease ysh1 OS=Paracoccidioides brasiliensis (strain Pb18) OX=502780 GN=PADG_06576 PE=4 SV=1
C1GK86	1.10847	0.137986	459	0.000432478	0.000479387	FACT complex subunit POB3 OS=Paracoccidioides brasiliensis (strain Pb18) OX=502780 GN=PADG_07672 PE=3 SV=2
C1G6T6	1.10878	0.202854	124	0.000257085	0.000285049	Uncharacterized protein OS=Paracoccidioides brasiliensis (strain Pb18) OX=502780 GN=PADG_02891 PE=4 SV=2
C1GB78	1.10882	0.249158	570	0.000184236	0.000204284	Uncharacterized protein OS=Paracoccidioides brasiliensis (strain Pb18) OX=502780 GN=PADG_04879 PE=4 SV=2
C1G8Y4	1.1096	0.203474	2361	0.00025642	0.000284524	MICOS complex subunit OS=Paracoccidioides brasiliensis (strain Pb18) OX=502780 GN=PADG_03720 PE=4 SV=1
C1GB16	1.11006	0.200062	1238	0.000400805	0.000444916	Mitochondrial import inner membrane translocase subunit TIM50 OS=Paracoccidioides brasiliensis (strain Pb18) OX=502780 GN=PADG_04452 PE=3 SV=1
C1G627	1.11073	0.0597401	1257	0.000296452	0.000329278	Uncharacterized protein OS=Paracoccidioides brasiliensis (strain Pb18) OX=502780 GN=PADG_02632 PE=4 SV=1
C1GHH3	1.11087	0.0267595	1162	0.000696642	0.000773878	Uncharacterized protein OS=Paracoccidioides brasiliensis (strain Pb18) OX=502780 GN=PADG_06709 PE=4 SV=1
C1G3M0	1.11093	0.102612	421	0.000799614	0.000888313	Glutamine synthetase OS=Paracoccidioides brasiliensis (strain Pb18) OX=502780 GN=PADG_01536 PE=3 SV=2
C1GML7	1.11109	0.0846669	791	0.000968036	0.00107557	Phosphoenolpyruvate carboxykinase [ATP] OS=Paracoccidioides brasiliensis (strain Pb18) OX=502780 GN=PADG_08503 PE=3 SV=2
C1GA56	1.1112	0.32136	229	0.000111955	0.000124404	Uncharacterized protein OS=Paracoccidioides brasiliensis (strain Pb18) OX=502780 GN=PADG_04142 PE=4 SV=2
C1GI55	1.11139	0.0632579	1631	0.000255928	0.000284437	Mitochondrial fission 1 protein OS=Paracoccidioides brasiliensis (strain Pb18) OX=502780 GN=PADG_06941 PE=3 SV=1
C1GCD4	1.11245	0.283737	2191	0.000151341	0.000168359	Uncharacterized protein OS=Paracoccidioides brasiliensis (strain Pb18) OX=502780 GN=PADG_04656 PE=4 SV=1
C1GFX4	1.11306	0.231874	475	0.000367805	0.000409388	Uncharacterized protein OS=Paracoccidioides brasiliensis (strain Pb18) OX=502780 GN=PADG_06160 PE=4 SV=1
C1GAG0	1.1142	0.0889708	1156	0.000869811	0.000969143	Uncharacterized protein OS=Paracoccidioides brasiliensis (strain Pb18) OX=502780 GN=PADG_04246 PE=4 SV=1
A0A0A0HSU0	1.11454	0.143688	1928	0.000606853	0.00067636	Uncharacterized protein OS=Paracoccidioides brasiliensis (strain Pb18) OX=502780 GN=PADG_11423 PE=4 SV=1
A0A0A0HUZ4	1.11483	0.305361	2701	0.000111552	0.000124361	26S protease subunit RPT4 OS=Paracoccidioides brasiliensis (strain Pb18) OX=502780 GN=PADG_11701 PE=4 SV=1
C1G3I9	1.11497	0.351478	2043	0.000247833	0.000276327	Actin-like protein OS=Paracoccidioides brasiliensis (strain Pb18) OX=502780 GN=PADG_01505 PE=3 SV=1
A0A0A0HQI3	1.1159	0.361413	1031	8.95047e-05	9.98785e-05	Uncharacterized protein OS=Paracoccidioides brasiliensis (strain Pb18) OX=502780 GN=PADG_12421 PE=4 SV=1
C1GIL9	1.11596	0.00614575	1143	0.00129097	0.00144067	Arginine-tRNA ligase OS=Paracoccidioides brasiliensis (strain Pb18) OX=502780 GN=PADG_07105 PE=3 SV=1
C1G733	1.11691	0.158582	96	0.00056389	0.000629817	Uncharacterized protein OS=Paracoccidioides brasiliensis (strain Pb18) OX=502780 GN=PADG_02988 PE=3 SV=1
C1G635	1.11739	0.154931	1235	0.000358989	0.00040113	ABC transporter ATP-binding protein ARB1 OS=Paracoccidioides brasiliensis (strain Pb18) OX=502780 GN=PADG_02640 PE=4 SV=2
C1FZS1	1.11757	0.0763127	2412	0.000811391	0.000906789	Uncharacterized protein OS=Paracoccidioides brasiliensis (strain Pb18) OX=502780 GN=PADG_00111 PE=4 SV=1
C1G5F8	1.11786	0.275299	1307	0.000214261	0.000239515	Uncharacterized protein OS=Paracoccidioides brasiliensis (strain Pb18) OX=502780 GN=PADG_02413 PE=4 SV=2
C1GES0	1.11884	0.0472907	2422	0.000643581	0.000720062	Uncharacterized protein OS=Paracoccidioides brasiliensis (strain Pb18) OX=502780 GN=PADG_05756 PE=4 SV=1
C1GCG7	1.11944	0.0978998	93	0.000572592	0.00064098	N-acetyl-gamma-glutamyl-phosphate reductase OS=Paracoccidioides brasiliensis (strain Pb18) OX=502780 GN=PADG_04689 PE=3 SV=2
C1GCF0	1.11991	0.0986345	399	0.00110333	0.00123563	ATP-dependent RNA helicase SUB2 OS=Paracoccidioides brasiliensis (strain Pb18) OX=502780 GN=PADG_04672 PE=4 SV=2
C1GKU1	1.11994	0.164998	1225	0.000349328	0.000391226	Uncharacterized protein OS=Paracoccidioides brasiliensis (strain Pb18) OX=502780 GN=PADG_07948 PE=4 SV=2
C1G596	1.12047	0.0481458	1460	0.000666789	0.000747117	3-hydroxyisobutyrate dehydrogenase OS=Paracoccidioides brasiliensis (strain Pb18) OX=502780 GN=PADG_03466 PE=4 SV=1
C1GDR3	1.12264	0.304137	889	0.000276734	0.000310674	Pre-mRNA-splicing factor cef1 OS=Paracoccidioides brasiliensis (strain Pb18) OX=502780 GN=PADG_05399 PE=4 SV=2
C1G0S4	1.12301	0.0606902	2932	0.000348485	0.000391353	Biotin-[acetyl-CoA-carboxylase] ligase OS=Paracoccidioides brasiliensis (strain Pb18) OX=502780 GN=PADG_00464 PE=4 SV=1
C1G4I7	1.12411	0.257883	2488	0.000236875	0.000266274	Mitochondrial import inner membrane translocase subunit TIM44 OS=Paracoccidioides brasiliensis (strain Pb18) OX=502780 GN=PADG_01853 PE=3 SV=1
C1GLH2	1.1247	0.0640307	1943	0.000616375	0.000693238	Uncharacterized protein OS=Paracoccidioides brasiliensis (strain Pb18) OX=502780 GN=PADG_08108 PE=4 SV=2
C1G161	1.12486	0.0935172	1195	0.000553666	0.000622797	Uncharacterized protein OS=Paracoccidioides brasiliensis (strain Pb18) OX=502780 GN=PADG_00601 PE=4 SV=1
C1GIA9	1.12523	0.18135	2341	0.000236997	0.000266676	Cytochrome c oxidase subunit OS=Paracoccidioides brasiliensis (strain Pb18) OX=502780 GN=PADG_06995 PE=3 SV=1
C1GKL8	1.1253	0.150621	1848	0.0007099	0.000798848	Protein transport protein SEC23 OS=Paracoccidioides brasiliensis (strain Pb18) OX=502780 GN=PADG_07804 PE=3 SV=2
C1GMV5	1.12579	0.0923602	1206	0.000553059	0.000622631	Uncharacterized protein OS=Paracoccidioides brasiliensis (strain Pb18) OX=502780 GN=PADG_08599 PE=4 SV=1
C1GM32	1.12689	0.0249296	418	0.000758239	0.000854452	RuvB-like helicase OS=Paracoccidioides brasiliensis (strain Pb18) OX=502780 GN=PADG_08423 PE=3 SV=1
C1G4N7	1.12713	0.196688	2011	0.000503928	0.000567991	Uncharacterized protein OS=Paracoccidioides brasiliensis (strain Pb18) OX=502780 GN=PADG_01903 PE=4 SV=1
C1G128	1.12719	0.185874	2934	0.000306893	0.000345925	Uncharacterized protein OS=Paracoccidioides brasiliensis (strain Pb18) OX=502780 GN=PADG_00568 PE=4 SV=1
C1G242	1.12846	0.252091	2753	0.000133284	0.000150405	Pre-mRNA-splicing factor cwc2 OS=Paracoccidioides brasiliensis (strain Pb18) OX=502780 GN=PADG_02208 PE=4 SV=1
C1GIS6	1.12872	0.23656	251	0.000134	0.000151247	U6 snRNA-associated Sm-like protein LSm4 OS=Paracoccidioides brasiliensis (strain Pb18) OX=502780 GN=LSM4 PE=3 SV=2
C1G7A4	1.12909	0.114439	2446	0.00051182	0.000577893	Uncharacterized protein OS=Paracoccidioides brasiliensis (strain Pb18) OX=502780 GN=PADG_03059 PE=4 SV=2
C1GN18	1.12933	0.0740113	1248	0.000307597	0.000347378	ATP phosphoribosyltransferase OS=Paracoccidioides brasiliensis (strain Pb18) OX=502780 GN=PADG_08604 PE=3 SV=2
C1GM33	1.12981	0.173313	2105	0.000165016	0.000186437	Uncharacterized protein OS=Paracoccidioides brasiliensis (strain Pb18) OX=502780 GN=PADG_08424 PE=4 SV=1
C1G2H9	1.12989	0.276578	2110	7.12009e-05	8.04491e-05	Uncharacterized protein OS=Paracoccidioides brasiliensis (strain Pb18) OX=502780 GN=PADG_02345 PE=4 SV=1
C1GMG5	1.12994	0.10975	881	0.000307858	0.000347861	Uncharacterized protein OS=Paracoccidioides brasiliensis (strain Pb18) OX=502780 GN=PADG_08451 PE=4 SV=2
C1GDQ6	1.13098	0.0139345	1629	0.000306829	0.000347018	Ubiquitin carboxyl-terminal hydrolase OS=Paracoccidioides brasiliensis (strain Pb18) OX=502780 GN=PADG_05392 PE=3 SV=2
C1G4C9	1.13099	0.0621377	461	0.000534848	0.000604909	Formamidopyrimidine-DNA glycosylase OS=Paracoccidioides brasiliensis (strain Pb18) OX=502780 GN=PADG_01795 PE=4 SV=1
C1GMD2	1.13168	0.351901	1710	0.000101827	0.000115236	Uncharacterized protein OS=Paracoccidioides brasiliensis (strain Pb18) OX=502780 GN=PADG_08218 PE=4 SV=1
C1G7G5	1.13234	0.275767	257	0.000101844	0.000115322	Uncharacterized protein OS=Paracoccidioides brasiliensis (strain Pb18) OX=502780 GN=PADG_03120 PE=4 SV=1
C1G3V2	1.13286	0.268553	969	0.000141749	0.000160582	Uncharacterized protein OS=Paracoccidioides brasiliensis (strain Pb18) OX=502780 GN=PADG_01618 PE=4 SV=1
C1GI19	1.13311	0.157836	2433	0.00056433	0.000639446	Vacuolar protein 8 OS=Paracoccidioides brasiliensis (strain Pb18) OX=502780 GN=PADG_06905 PE=4 SV=2
C1G215	1.13481	0.126776	2432	0.000509038	0.000577663	Uncharacterized protein OS=Paracoccidioides brasiliensis (strain Pb18) OX=502780 GN=PADG_02181 PE=4 SV=2
C1GN49	1.13584	0.131739	2071	0.000234746	0.000266633	Uncharacterized protein OS=Paracoccidioides brasiliensis (strain Pb18) OX=502780 GN=PADG_08693 PE=4 SV=2
C1GLJ9	1.13634	0.0947683	2419	0.00079061	0.000898403	Uncharacterized protein OS=Paracoccidioides brasiliensis (strain Pb18) OX=502780 GN=PADG_08240 PE=4 SV=1
C1FZ06	1.13699	0.107894	1461	0.000626764	0.000712622	DNA-binding protein, 42 kDa OS=Paracoccidioides brasiliensis (strain Pb18) OX=502780 GN=PADG_01032 PE=4 SV=2
A0A0A0HRQ4	1.1372	0.0972969	59	0.000540431	0.00061458	Uncharacterized protein OS=Paracoccidioides brasiliensis (strain Pb18) OX=502780 GN=PADG_12025 PE=3 SV=1
C1FZD3	1.13833	0.156534	2348	0.000296242	0.000337222	Uridylate kinase OS=Paracoccidioides brasiliensis (strain Pb18) OX=502780 GN=PADG_01159 PE=3 SV=2
C1GJV4	1.13855	0.284262	2046	0.000195858	0.000222995	Uncharacterized protein OS=Paracoccidioides brasiliensis (strain Pb18) OX=502780 GN=PADG_07540 PE=3 SV=1
C1G957	1.13862	0.0290583	58	0.000616484	0.000701942	Dolichyl-diphosphooligosaccharide--protein glycosyltransferase subunit 1 OS=Paracoccidioides brasiliensis (strain Pb18) OX=502780 GN=PADG_03793 PE=3 SV=1
C1GCN9	1.13943	0.00131312	392	0.0013029	0.00148456	Uncharacterized protein OS=Paracoccidioides brasiliensis (strain Pb18) OX=502780 GN=PADG_04761 PE=4 SV=2
C1GEL5	1.13959	0.0256601	2847	0.000849287	0.000967837	Uncharacterized protein OS=Paracoccidioides brasiliensis (strain Pb18) OX=502780 GN=PADG_05701 PE=4 SV=1
C1GJD4	1.14009	0.150648	1187	0.000747894	0.000852666	Uncharacterized protein OS=Paracoccidioides brasiliensis (strain Pb18) OX=502780 GN=PADG_07370 PE=4 SV=1
C1G4R7	1.14081	0.147528	535	0.000256331	0.000292424	V-type proton ATPase subunit H OS=Paracoccidioides brasiliensis (strain Pb18) OX=502780 GN=PADG_01933 PE=3 SV=1
C1GBX9	1.1414	0.186296	469	0.000319367	0.000364527	Cytochrome b-c1 complex subunit 7 OS=Paracoccidioides brasiliensis (strain Pb18) OX=502780 GN=PADG_04501 PE=3 SV=1
C1G5M0	1.1421	0.315164	1312	0.000154754	0.000176745	Uncharacterized protein OS=Paracoccidioides brasiliensis (strain Pb18) OX=502780 GN=PADG_02475 PE=4 SV=1
C1GBG4	1.1426	0.0491919	1174	0.000769001	0.000878662	Coatomer subunit gamma OS=Paracoccidioides brasiliensis (strain Pb18) OX=502780 GN=PADG_04965 PE=3 SV=1
C1G6C3	1.14387	0.188684	130	0.000410528	0.000469593	Uncharacterized protein OS=Paracoccidioides brasiliensis (strain Pb18) OX=502780 GN=PADG_02728 PE=4 SV=2
C1G7B7	1.14401	0.24258	1322	0.000225021	0.000257426	Aspartate-tRNA ligase OS=Paracoccidioides brasiliensis (strain Pb18) OX=502780 GN=PADG_03072 PE=3 SV=1
C1G2S7	1.14439	0.0366119	2381	0.00153988	0.00176222	Rab GDP dissociation inhibitor OS=Paracoccidioides brasiliensis (strain Pb18) OX=502780 GN=PADG_01243 PE=3 SV=1
C1G055	1.14503	0.136043	2047	0.000513149	0.000587568	Uncharacterized protein OS=Paracoccidioides brasiliensis (strain Pb18) OX=502780 GN=PADG_00245 PE=4 SV=1
C1GD67	1.14542	0.0964645	90	0.000348988	0.000399739	Peptidyl-prolyl cis-trans isomerase OS=Paracoccidioides brasiliensis (strain Pb18) OX=502780 GN=PADG_05203 PE=4 SV=2
C1GEE2	1.14548	0.0120749	794	0.000891255	0.00102092	Protein disulfide-isomerase domain OS=Paracoccidioides brasiliensis (strain Pb18) OX=502780 GN=PADG_05628 PE=3 SV=1
C1GG57	1.14608	0.196956	542	0.000155246	0.000177924	Uncharacterized protein OS=Paracoccidioides brasiliensis (strain Pb18) OX=502780 GN=PADG_06294 PE=4 SV=1
C1GF10	1.14612	0.172562	2550	0.000162944	0.000186753	Uncharacterized protein OS=Paracoccidioides brasiliensis (strain Pb18) OX=502780 GN=PADG_05846 PE=4 SV=1
C1FYQ6	1.14634	0.217318	2051	0.000326374	0.000374137	Clustered mitochondria protein homolog OS=Paracoccidioides brasiliensis (strain Pb18) OX=502780 GN=CLU1 PE=3 SV=1
C1GJN3	1.14659	0.210056	1306	0.000123789	0.000141935	Uncharacterized protein OS=Paracoccidioides brasiliensis (strain Pb18) OX=502780 GN=PADG_07469 PE=4 SV=2
C1GEC2	1.14738	0.112606	83	0.000357557	0.000410253	Uncharacterized protein OS=Paracoccidioides brasiliensis (strain Pb18) OX=502780 GN=PADG_05608 PE=4 SV=2
C1GCS4	1.14818	0.00549988	1050	0.00132402	0.00152021	Pre-mRNA-splicing factor rse1 OS=Paracoccidioides brasiliensis (strain Pb18) OX=502780 GN=PADG_04796 PE=4 SV=1
C1G312	1.14895	0.0918841	1185	0.000636195	0.000730954	Ornithine aminotransferase OS=Paracoccidioides brasiliensis (strain Pb18) OX=502780 GN=PADG_01328 PE=3 SV=1
C1GBX5	1.14906	0.0127404	850	0.000378746	0.000435202	Uncharacterized protein OS=Paracoccidioides brasiliensis (strain Pb18) OX=502780 GN=PADG_04497 PE=4 SV=2
C1G1V2	1.14955	0.28845	222	6.20827e-05	7.13673e-05	Uncharacterized protein OS=Paracoccidioides brasiliensis (strain Pb18) OX=502780 GN=PADG_02118 PE=4 SV=2
C1GDX6	1.14996	0.0663082	2439	0.000472337	0.00054317	Uncharacterized protein OS=Paracoccidioides brasiliensis (strain Pb18) OX=502780 GN=PADG_05462 PE=4 SV=1
C1GA85	1.15068	0.193294	2693	0.000393411	0.00045269	4-nitrophenylphosphatase OS=Paracoccidioides brasiliensis (strain Pb18) OX=502780 GN=PADG_04171 PE=4 SV=1
C1GB27	1.15076	0.029171	1161	0.000625013	0.000719239	Adenylosuccinate lyase OS=Paracoccidioides brasiliensis (strain Pb18) OX=502780 GN=PADG_04828 PE=3 SV=1
C1GGY3	1.15078	0.0978006	1459	0.000678795	0.000781146	Uncharacterized protein OS=Paracoccidioides brasiliensis (strain Pb18) OX=502780 GN=PADG_06202 PE=4 SV=1
C1GDU7	1.15135	0.332289	2159	0.000104912	0.000120791	Uncharacterized protein OS=Paracoccidioides brasiliensis (strain Pb18) OX=502780 GN=PADG_05433 PE=4 SV=2
C1G4D8	1.15162	0.293728	2788	0.000124217	0.000143051	Uncharacterized protein OS=Paracoccidioides brasiliensis (strain Pb18) OX=502780 GN=PADG_01804 PE=4 SV=1
C1G121	1.15277	0.233481	2760	0.000153559	0.000177018	Galactokinase OS=Paracoccidioides brasiliensis (strain Pb18) OX=502780 GN=PADG_00561 PE=4 SV=2
C1GAP0	1.15393	0.33809	2630	8.62818e-05	9.95628e-05	Uncharacterized protein OS=Paracoccidioides brasiliensis (strain Pb18) OX=502780 GN=PADG_04326 PE=4 SV=1
C1GJT4	1.15397	0.0507542	1196	0.000501555	0.000578778	Uncharacterized protein OS=Paracoccidioides brasiliensis (strain Pb18) OX=502780 GN=PADG_07520 PE=4 SV=1
C1GGW7	1.15487	0.17468	1237	0.000246204	0.000284333	Uncharacterized protein OS=Paracoccidioides brasiliensis (strain Pb18) OX=502780 GN=PADG_06186 PE=4 SV=1
C1G0D6	1.15645	0.0868295	886	0.000184299	0.000213134	ADP-ribosylation factor-like protein 1 OS=Paracoccidioides brasiliensis (strain Pb18) OX=502780 GN=PADG_00326 PE=3 SV=2
C1G515	1.1568	0.183899	2160	9.2332e-05	0.00010681	Uncharacterized protein OS=Paracoccidioides brasiliensis (strain Pb18) OX=502780 GN=PADG_02031 PE=4 SV=1
C1GIR0	1.15697	0.12975	860	0.000277008	0.00032049	Pyrroline-5-carboxylate reductase OS=Paracoccidioides brasiliensis (strain Pb18) OX=502780 GN=PADG_07146 PE=3 SV=2
C1FZL1	1.15725	0.0282383	2903	0.00058449	0.000676399	26S protease regulatory subunit 7 OS=Paracoccidioides brasiliensis (strain Pb18) OX=502780 GN=PADG_00051 PE=3 SV=1
C1GE18	1.16216	0.0139593	414	0.000749748	0.000871328	Thioredoxin OS=Paracoccidioides brasiliensis (strain Pb18) OX=502780 GN=PADG_05504 PE=3 SV=1
A0A0A0HY53	1.163	0.0449736	80	0.000543877	0.000632531	NADPH-dependent diflavin oxidoreductase 1 OS=Paracoccidioides brasiliensis (strain Pb18) OX=502780 GN=TAH18 PE=3 SV=1
C1GB62	1.16374	0.00400321	1999	0.000955161	0.00111156	Leucine-tRNA ligase OS=Paracoccidioides brasiliensis (strain Pb18) OX=502780 GN=PADG_04863 PE=4 SV=2
C1G8D6	1.16431	0.00385316	1582	0.000542886	0.000632089	S-methyl-5'-thioadenosine phosphorylase OS=Paracoccidioides brasiliensis (strain Pb18) OX=502780 GN=PADG_03522 PE=3 SV=2
C1G1L5	1.16447	0.117074	2796	0.000102508	0.000119367	Uncharacterized protein OS=Paracoccidioides brasiliensis (strain Pb18) OX=502780 GN=PADG_00755 PE=4 SV=1
C1GAP7	1.165	0.143733	587	0.000130097	0.000151563	Nuclear pore complex protein Nup85 OS=Paracoccidioides brasiliensis (strain Pb18) OX=502780 GN=PADG_04333 PE=3 SV=1
C1GD32	1.16508	0.316777	2141	0.000122131	0.000142293	Uncharacterized protein OS=Paracoccidioides brasiliensis (strain Pb18) OX=502780 GN=PADG_05168 PE=4 SV=1
C1G4I1	1.16553	0.0452357	807	0.000709347	0.000826765	Uncharacterized protein OS=Paracoccidioides brasiliensis (strain Pb18) OX=502780 GN=PADG_01847 PE=4 SV=1
C1GDE5	1.1658	0.035174	1935	0.00058624	0.000683439	Uncharacterized protein OS=Paracoccidioides brasiliensis (strain Pb18) OX=502780 GN=PADG_05281 PE=4 SV=1
C1GN88	1.16599	0.0501977	1609	0.000327308	0.000381639	Uncharacterized protein OS=Paracoccidioides brasiliensis (strain Pb18) OX=502780 GN=PADG_08724 PE=4 SV=1
C1GAG5	1.16756	0.0380016	1588	0.000441596	0.000515589	Eukaryotic translation initiation factor 3 subunit I OS=Paracoccidioides brasiliensis (strain Pb18) OX=502780 GN=TIF34 PE=3 SV=1
C1G042	1.16802	0.0741217	2056	0.000205692	0.000240252	Uncharacterized protein OS=Paracoccidioides brasiliensis (strain Pb18) OX=502780 GN=PADG_00232 PE=4 SV=1
C1G0X9	1.16996	0.125373	105	0.000388911	0.000455009	AP-1 complex subunit gamma OS=Paracoccidioides brasiliensis (strain Pb18) OX=502780 GN=PADG_00519 PE=3 SV=1
C1GCA4	1.17005	0.3536	207	6.70595e-05	7.84628e-05	Serine/threonine-protein phosphatase 2A activator OS=Paracoccidioides brasiliensis (strain Pb18) OX=502780 GN=PADG_04626 PE=3 SV=2
A0A0A0HU84	1.17068	0.0414816	1927	0.000523341	0.000612663	Uncharacterized protein OS=Paracoccidioides brasiliensis (strain Pb18) OX=502780 GN=PADG_12029 PE=4 SV=1
C1G5M9	1.17104	0.0204196	1145	0.00117744	0.00137883	Valine-tRNA ligase OS=Paracoccidioides brasiliensis (strain Pb18) OX=502780 GN=PADG_02484 PE=3 SV=1
C1GGY0	1.17184	0.0678483	453	0.000524382	0.000614492	Uncharacterized protein OS=Paracoccidioides brasiliensis (strain Pb18) OX=502780 GN=PADG_06199 PE=4 SV=2
C1GMV7	1.17246	0.155858	1764	0.000144492	0.000169411	Uncharacterized protein OS=Paracoccidioides brasiliensis (strain Pb18) OX=502780 GN=PADG_08601 PE=4 SV=1
C1GGY5	1.17364	0.149145	2739	0.000205315	0.000240967	Uncharacterized protein OS=Paracoccidioides brasiliensis (strain Pb18) OX=502780 GN=PADG_06204 PE=4 SV=1
C1G4K2	1.17421	0.25077	651	0.000173634	0.000203884	Pre-mRNA-processing ATP-dependent RNA helicase PRP5 OS=Paracoccidioides brasiliensis (strain Pb18) OX=502780 GN=PADG_01868 PE=4 SV=2
C1GAV8	1.17512	0.0326596	534	0.000173859	0.000204305	Uncharacterized protein OS=Paracoccidioides brasiliensis (strain Pb18) OX=502780 GN=PADG_04394 PE=4 SV=2
C1GIX8	1.17528	0.0485751	1313	0.000143661	0.000168842	Uncharacterized protein OS=Paracoccidioides brasiliensis (strain Pb18) OX=502780 GN=PADG_07214 PE=4 SV=2
C1G6V7	1.17576	0.115163	2909	0.000377921	0.000444346	V-type proton ATPase subunit C OS=Paracoccidioides brasiliensis (strain Pb18) OX=502780 GN=PADG_02912 PE=3 SV=1
C1G9L7	1.17622	0.218337	674	0.000127962	0.000150512	Uncharacterized protein OS=Paracoccidioides brasiliensis (strain Pb18) OX=502780 GN=PADG_03953 PE=4 SV=2
C1G7J2	1.17691	0.0136035	2395	0.00104335	0.00122794	Uncharacterized protein OS=Paracoccidioides brasiliensis (strain Pb18) OX=502780 GN=PADG_03147 PE=4 SV=2
C1G349	1.17721	0.0616937	841	0.000430114	0.000506337	Uncharacterized protein OS=Paracoccidioides brasiliensis (strain Pb18) OX=502780 GN=PADG_01365 PE=4 SV=1
C1FZG1	1.17978	0.00669506	796	0.000685512	0.000808751	Peptidyl-prolyl cis-trans isomerase OS=Paracoccidioides brasiliensis (strain Pb18) OX=502780 GN=PADG_00001 PE=3 SV=1
C1G8E5	1.1806	0.131905	2748	0.000309393	0.000365269	Uncharacterized protein OS=Paracoccidioides brasiliensis (strain Pb18) OX=502780 GN=PADG_03531 PE=4 SV=1
A0A0A0HQS4	1.18092	0.213945	1660	0.000232886	0.00027502	Uncharacterized protein OS=Paracoccidioides brasiliensis (strain Pb18) OX=502780 GN=PADG_12349 PE=4 SV=1
C1GBG9	1.18149	0.170083	2461	0.000173367	0.000204831	CK1/CK1/CK1-D protein kinase OS=Paracoccidioides brasiliensis (strain Pb18) OX=502780 GN=PADG_04970 PE=3 SV=1
C1GAM1	1.18242	0.0753513	2031	0.00054017	0.000638705	Uncharacterized protein OS=Paracoccidioides brasiliensis (strain Pb18) OX=502780 GN=PADG_04307 PE=4 SV=2
C1GL26	1.18245	0.0160579	410	0.000871516	0.00103052	Eukaryotic translation initiation factor 3 subunit B OS=Paracoccidioides brasiliensis (strain Pb18) OX=502780 GN=PRT1 PE=3 SV=1
C1G7C1	1.18416	0.0715573	405	0.000954792	0.00113063	26S proteasome regulatory subunit RPN2 OS=Paracoccidioides brasiliensis (strain Pb18) OX=502780 GN=PADG_03076 PE=3 SV=1
C1G411	1.18485	0.0174631	793	0.00092349	0.0010942	Acetyl-coenzyme A synthetase OS=Paracoccidioides brasiliensis (strain Pb18) OX=502780 GN=PADG_01677 PE=3 SV=2
C1G3W4	1.18512	0.0435235	482	0.000503041	0.000596164	Uncharacterized protein OS=Paracoccidioides brasiliensis (strain Pb18) OX=502780 GN=PADG_01630 PE=4 SV=2
C1G1S8	1.1863	0.220754	2560	0.000142204	0.000168696	Uncharacterized protein OS=Paracoccidioides brasiliensis (strain Pb18) OX=502780 GN=PADG_02094 PE=4 SV=2
C1GHY0	1.18649	0.100848	1717	0.000142517	0.000169095	Trafficking protein particle complex subunit OS=Paracoccidioides brasiliensis (strain Pb18) OX=502780 GN=PADG_06866 PE=3 SV=1
C1GGA8	1.18717	0.0545857	1964	0.000412203	0.000489354	Uncharacterized protein OS=Paracoccidioides brasiliensis (strain Pb18) OX=502780 GN=PADG_06345 PE=4 SV=2
C1GDM1	1.18766	0.0866457	827	0.000388738	0.00046169	Hydroxyethylthiazole kinase OS=Paracoccidioides brasiliensis (strain Pb18) OX=502780 GN=PADG_05357 PE=3 SV=1
C1G2P2	1.18782	0.0632071	1214	0.000359026	0.000426459	Uncharacterized protein OS=Paracoccidioides brasiliensis (strain Pb18) OX=502780 GN=PADG_01208 PE=4 SV=1
C1G1K5	1.18818	0.120406	1650	0.000307469	0.000365328	Acyl-CoA thioesterase II OS=Paracoccidioides brasiliensis (strain Pb18) OX=502780 GN=PADG_00745 PE=4 SV=1
C1GHD8	1.18918	0.179532	2081	0.000163973	0.000194993	Phosphatidylserine decarboxylase proenzyme 1, mitochondrial OS=Paracoccidioides brasiliensis (strain Pb18) OX=502780 GN=PSD1 PE=3 SV=1
C1G2J2	1.19068	0.319151	2182	0.000120427	0.00014339	Ribosomal protein L32 OS=Paracoccidioides brasiliensis (strain Pb18) OX=502780 GN=PADG_02358 PE=3 SV=2
C1G9F6	1.19136	0.149332	193	0.000216395	0.000257804	Uncharacterized protein OS=Paracoccidioides brasiliensis (strain Pb18) OX=502780 GN=PADG_03892 PE=4 SV=2
C1G2E9	1.19202	0.118923	142	0.000246485	0.000293815	Uncharacterized protein OS=Paracoccidioides brasiliensis (strain Pb18) OX=502780 GN=PADG_02315 PE=4 SV=2
C1FZA0	1.1928	0.0823627	2924	0.000193858	0.000231234	Molybdopterin synthase catalytic subunit OS=Paracoccidioides brasiliensis (strain Pb18) OX=502780 GN=cnxH PE=3 SV=1
A0A0A0HWM1	1.19291	0.138445	503	0.00029809	0.000355595	Uncharacterized protein OS=Paracoccidioides brasiliensis (strain Pb18) OX=502780 GN=PADG_11206 PE=4 SV=1
C1GIX5	1.19369	0.157428	989	0.000194222	0.000231842	Uncharacterized protein OS=Paracoccidioides brasiliensis (strain Pb18) OX=502780 GN=PADG_07211 PE=4 SV=2
C1G0G5	1.19373	0.242162	2799	0.000239106	0.000285428	Uncharacterized protein OS=Paracoccidioides brasiliensis (strain Pb18) OX=502780 GN=PADG_00355 PE=4 SV=1
C1GLD3	1.19404	0.0141434	2320	0.000491129	0.000586426	FACT complex subunit spt16 OS=Paracoccidioides brasiliensis (strain Pb18) OX=502780 GN=PADG_08069 PE=4 SV=2
C1GLK2	1.19404	0.0566528	2334	0.000320095	0.000382208	Uncharacterized protein OS=Paracoccidioides brasiliensis (strain Pb18) OX=502780 GN=PADG_08243 PE=4 SV=2
C1GAQ7	1.19475	0.0323338	108	0.000349149	0.000417145	Uncharacterized protein OS=Paracoccidioides brasiliensis (strain Pb18) OX=502780 GN=PADG_04343 PE=4 SV=1
C1G5Y3	1.19611	0.085813	1641	0.00024529	0.000293392	Protein phosphatase PP2A regulatory subunit B OS=Paracoccidioides brasiliensis (strain Pb18) OX=502780 GN=PADG_02588 PE=3 SV=2
C1GEF6	1.19666	0.181549	2780	0.000102281	0.000122396	Uncharacterized protein OS=Paracoccidioides brasiliensis (strain Pb18) OX=502780 GN=PADG_05642 PE=4 SV=2
C1G390	1.19696	0.00940698	1955	0.000676247	0.000809444	Phenylalanine-tRNA ligase, beta subunit OS=Paracoccidioides brasiliensis (strain Pb18) OX=502780 GN=PADG_01406 PE=4 SV=2
C1GD85	1.19806	0.165063	609	0.000103802	0.000124361	Polyadenylation factor subunit 2 OS=Paracoccidioides brasiliensis (strain Pb18) OX=502780 GN=PADG_05221 PE=4 SV=2
A0A0A0HTR8	1.1988	0.0314857	805	0.000571351	0.000684936	Uncharacterized protein OS=Paracoccidioides brasiliensis (strain Pb18) OX=502780 GN=PADG_11833 PE=4 SV=1
C1G0X3	1.20019	0.010381	1956	0.000666246	0.000799626	Uncharacterized protein OS=Paracoccidioides brasiliensis (strain Pb18) OX=502780 GN=PADG_00513 PE=4 SV=1
C1GGW1	1.20154	0.0118323	1055	0.00113162	0.0013597	Uncharacterized protein OS=Paracoccidioides brasiliensis (strain Pb18) OX=502780 GN=PADG_06180 PE=4 SV=1
C1G4T3	1.20289	0.0109236	401	0.00113693	0.0013676	Elongation factor Tu OS=Paracoccidioides brasiliensis (strain Pb18) OX=502780 GN=PADG_01949 PE=3 SV=1
C1G790	1.2033	0.0851132	1279	0.000288038	0.000346597	Uncharacterized protein OS=Paracoccidioides brasiliensis (strain Pb18) OX=502780 GN=PADG_03045 PE=4 SV=1
C1G0D4	1.20492	0.00628635	777	0.00154358	0.0018599	Catalase OS=Paracoccidioides brasiliensis (strain Pb18) OX=502780 GN=PADG_00324 PE=3 SV=2
C1G6S5	1.2056	0.206704	1402	0.000176698	0.000213027	Non-specific serine/threonine protein kinase OS=Paracoccidioides brasiliensis (strain Pb18) OX=502780 GN=PADG_02880 PE=4 SV=1
C1GGI3	1.20599	0.0393323	1450	0.000729194	0.000879401	Uncharacterized protein OS=Paracoccidioides brasiliensis (strain Pb18) OX=502780 GN=PADG_06420 PE=3 SV=1
C1G885	1.20613	0.142221	1622	0.00037674	0.000454397	Molybdopterin molybdenumtransferase OS=Paracoccidioides brasiliensis (strain Pb18) OX=502780 GN=PADG_03390 PE=3 SV=1
C1G3P8	1.20657	0.00676353	1057	0.00126811	0.00153007	Methylmalonate-semialdehyde dehydrogenase (Acylating) OS=Paracoccidioides brasiliensis (strain Pb18) OX=502780 GN=PADG_01564 PE=4 SV=2
C1FZJ4	1.20718	0.0830594	2599	0.000140075	0.000169095	Transcription elongation factor S-II OS=Paracoccidioides brasiliensis (strain Pb18) OX=502780 GN=PADG_00034 PE=4 SV=1
C1FYZ0	1.20844	0.212741	2808	0.000168542	0.000203672	Uncharacterized protein OS=Paracoccidioides brasiliensis (strain Pb18) OX=502780 GN=PADG_01016 PE=4 SV=1
C1GLD7	1.2086	0.0179226	94	0.000492989	0.000595825	Uncharacterized protein OS=Paracoccidioides brasiliensis (strain Pb18) OX=502780 GN=PADG_08073 PE=4 SV=1
A0A0A0HTF2	1.20922	0.0954061	1366	0.000153762	0.000185931	Uncharacterized protein OS=Paracoccidioides brasiliensis (strain Pb18) OX=502780 GN=PADG_11321 PE=4 SV=1
C1G2D4	1.20923	0.0268953	2298	0.000572974	0.000692856	Uncharacterized protein OS=Paracoccidioides brasiliensis (strain Pb18) OX=502780 GN=PADG_02300 PE=3 SV=2
C1GB76	1.20967	0.0700356	463	0.000484733	0.000586367	Uncharacterized protein OS=Paracoccidioides brasiliensis (strain Pb18) OX=502780 GN=PADG_04877 PE=4 SV=1
C1G017	1.21088	0.0531433	859	0.00030858	0.000373652	Uncharacterized protein OS=Paracoccidioides brasiliensis (strain Pb18) OX=502780 GN=PADG_00207 PE=4 SV=1
C1GLZ5	1.21222	0.0159364	2005	0.000667473	0.000809127	Uncharacterized protein OS=Paracoccidioides brasiliensis (strain Pb18) OX=502780 GN=PADG_08386 PE=4 SV=1
A0A0A0HV38	1.21452	0.0169203	30	0.00101632	0.00123435	Cysteine desulfurase, mitochondrial OS=Paracoccidioides brasiliensis (strain Pb18) OX=502780 GN=PADG_12043 PE=3 SV=1
C1G9F0	1.21492	0.0203547	478	0.000358925	0.000436064	Uncharacterized protein OS=Paracoccidioides brasiliensis (strain Pb18) OX=502780 GN=PADG_03886 PE=4 SV=1
C1G0E6	1.21538	0.05085	556	0.000153987	0.000187152	Prephenate dehydrogenase [NADP(+)] OS=Paracoccidioides brasiliensis (strain Pb18) OX=502780 GN=PADG_00336 PE=3 SV=2
C1G1V7	1.21642	0.0343031	445	0.000511487	0.000622184	Uncharacterized protein OS=Paracoccidioides brasiliensis (strain Pb18) OX=502780 GN=PADG_02123 PE=4 SV=1
C1GK88	1.21644	0.0349559	118	0.000328874	0.000400056	Carbonic anhydrase OS=Paracoccidioides brasiliensis (strain Pb18) OX=502780 GN=PADG_07674 PE=3 SV=1
C1G7T7	1.21669	0.107895	2054	0.000226056	0.000275039	Uncharacterized protein OS=Paracoccidioides brasiliensis (strain Pb18) OX=502780 GN=PADG_03242 PE=4 SV=1
C1G991	1.21737	0.340914	2092	0.000117819	0.00014343	Uncharacterized protein OS=Paracoccidioides brasiliensis (strain Pb18) OX=502780 GN=PADG_03827 PE=4 SV=1
C1FYQ9	1.21804	0.0295717	2030	0.000328926	0.000400645	Uncharacterized protein OS=Paracoccidioides brasiliensis (strain Pb18) OX=502780 GN=PADG_00935 PE=4 SV=2
C1GJ08	1.21873	0.163119	2131	0.000153546	0.000187131	Uncharacterized protein OS=Paracoccidioides brasiliensis (strain Pb18) OX=502780 GN=PADG_07244 PE=4 SV=1
C1G3N0	1.21885	0.0141114	1600	0.000379513	0.000462571	Uncharacterized protein OS=Paracoccidioides brasiliensis (strain Pb18) OX=502780 GN=PADG_01546 PE=4 SV=2
C1GJ38	1.21907	0.0356273	2413	0.000890534	0.00108562	Multifunctional tryptophan biosynthesis protein OS=Paracoccidioides brasiliensis (strain Pb18) OX=502780 GN=PADG_07274 PE=3 SV=1
C1GE03	1.21918	0.0451277	939	0.000153334	0.000186942	Ras-like protein OS=Paracoccidioides brasiliensis (strain Pb18) OX=502780 GN=PADG_05489 PE=4 SV=2
C1G5N7	1.21948	0.164728	2101	0.000175604	0.000214145	Uncharacterized protein OS=Paracoccidioides brasiliensis (strain Pb18) OX=502780 GN=PADG_02492 PE=4 SV=2
C1GN05	1.21962	0.177369	2762	5.13289e-05	6.26015e-05	Uncharacterized protein OS=Paracoccidioides brasiliensis (strain Pb18) OX=502780 GN=PADG_08665 PE=4 SV=2
C1GE05	1.21967	0.0476968	1249	0.000204548	0.00024948	Uncharacterized protein OS=Paracoccidioides brasiliensis (strain Pb18) OX=502780 GN=PADG_05491 PE=3 SV=1
C1G170	1.22169	0.204035	2801	5.11896e-05	6.2538e-05	Uncharacterized protein OS=Paracoccidioides brasiliensis (strain Pb18) OX=502780 GN=PADG_00610 PE=4 SV=1
C1GK23	1.2221	0.0277038	119	0.000378695	0.000462803	Dihydroxy-acid dehydratase OS=Paracoccidioides brasiliensis (strain Pb18) OX=502780 GN=PADG_07609 PE=4 SV=1
C1G3K3	1.2224	0.0816451	538	0.000276644	0.000338169	Uncharacterized protein OS=Paracoccidioides brasiliensis (strain Pb18) OX=502780 GN=PADG_01519 PE=4 SV=1
C1GMP4	1.22274	0.115425	537	0.000247514	0.000302644	Thymidylate synthase OS=Paracoccidioides brasiliensis (strain Pb18) OX=502780 GN=PADG_08530 PE=3 SV=1
C1G4R2	1.2236	0.0297906	798	0.00076886	0.00094078	S-adenosylmethionine synthase OS=Paracoccidioides brasiliensis (strain Pb18) OX=502780 GN=PADG_01928 PE=3 SV=1
C1GBG2	1.22444	0.255501	1745	7.23449e-05	8.8582e-05	TIGR01456 family HAD hydrolase OS=Paracoccidioides brasiliensis (strain Pb18) OX=502780 GN=PADG_04963 PE=4 SV=1
C1G4L4	1.22551	0.0332951	2022	0.000399064	0.000489058	Uncharacterized protein OS=Paracoccidioides brasiliensis (strain Pb18) OX=502780 GN=PADG_01880 PE=4 SV=1
C1GL06	1.22577	0.0287659	2918	0.000326388	0.000400076	Succinate dehydrogenase [ubiquinone] iron-sulfur subunit, mitochondrial OS=Paracoccidioides brasiliensis (strain Pb18) OX=502780 GN=PADG_08013 PE=3 SV=2
C1GLM4	1.22585	0.0112426	812	0.000492548	0.000603791	Methionine aminopeptidase 2 OS=Paracoccidioides brasiliensis (strain Pb18) OX=502780 GN=PADG_08265 PE=3 SV=1
C1G2X5	1.22602	0.117558	2713	0.000123246	0.000151101	Uncharacterized protein OS=Paracoccidioides brasiliensis (strain Pb18) OX=502780 GN=PADG_01291 PE=4 SV=1
C1G7Q5	1.22622	0.094781	913	0.000225021	0.000275925	Altered inheritance of mitochondria protein 41 OS=Paracoccidioides brasiliensis (strain Pb18) OX=502780 GN=AIM41 PE=3 SV=1
C1GEK0	1.22791	0.0142182	2336	0.000318612	0.000391226	Uncharacterized protein OS=Paracoccidioides brasiliensis (strain Pb18) OX=502780 GN=PADG_05686 PE=4 SV=2
C1GAQ4	1.2296	0.0377921	1179	0.000802329	0.000986543	DNA-directed RNA polymerase subunit beta OS=Paracoccidioides brasiliensis (strain Pb18) OX=502780 GN=PADG_04340 PE=3 SV=1
C1G5H1	1.22975	0.257322	1783	7.24599e-05	8.91079e-05	Uncharacterized protein OS=Paracoccidioides brasiliensis (strain Pb18) OX=502780 GN=PADG_02426 PE=4 SV=2
C1G9N2	1.23077	0.260348	1043	0.000101043	0.000124361	Pre-rRNA-processing protein PNO1 OS=Paracoccidioides brasiliensis (strain Pb18) OX=502780 GN=PADG_03968 PE=4 SV=1
C1G7G6	1.23215	0.204626	1288	0.000126421	0.00015577	Uncharacterized protein OS=Paracoccidioides brasiliensis (strain Pb18) OX=502780 GN=PADG_03121 PE=4 SV=1
C1GLD0	1.23293	0.0416765	533	0.000316324	0.000390006	Purine nucleoside phosphorylase OS=Paracoccidioides brasiliensis (strain Pb18) OX=502780 GN=PADG_08066 PE=3 SV=2
C1G7X1	1.23359	0.0823165	505	0.00024525	0.000302538	S-(hydroxymethyl)glutathione dehydrogenase OS=Paracoccidioides brasiliensis (strain Pb18) OX=502780 GN=PADG_03276 PE=3 SV=2
C1GA06	1.23372	0.0578433	2052	0.000245615	0.00030302	Peptidyl-prolyl cis-trans isomerase OS=Paracoccidioides brasiliensis (strain Pb18) OX=502780 GN=PADG_04092 PE=3 SV=1
C1G913	1.23428	0.107486	2716	0.000144101	0.00017786	Acylphosphatase OS=Paracoccidioides brasiliensis (strain Pb18) OX=502780 GN=PADG_03749 PE=3 SV=2
C1GCQ2	1.23438	0.222633	139	0.000166109	0.000205042	Uncharacterized protein OS=Paracoccidioides brasiliensis (strain Pb18) OX=502780 GN=PADG_04774 PE=4 SV=1
C1GJ52	1.23518	0.0131826	1849	0.000618887	0.000764437	Uncharacterized protein OS=Paracoccidioides brasiliensis (strain Pb18) OX=502780 GN=PADG_07288 PE=4 SV=1
C1G1J5	1.23568	0.027582	1961	0.000431711	0.000533455	Lactam utilization protein lamB OS=Paracoccidioides brasiliensis (strain Pb18) OX=502780 GN=PADG_00735 PE=4 SV=2
C1G7W9	1.23613	0.110897	951	7.19683e-05	8.89619e-05	Mitochondrial import inner membrane translocase subunit tim9 OS=Paracoccidioides brasiliensis (strain Pb18) OX=502780 GN=PADG_03274 PE=4 SV=1
C1GJL6	1.23963	0.232307	933	0.000194185	0.000240718	Uncharacterized protein OS=Paracoccidioides brasiliensis (strain Pb18) OX=502780 GN=PADG_07452 PE=4 SV=1
C1G9C7	1.24068	0.116761	2513	0.000143169	0.000177628	Uncharacterized protein OS=Paracoccidioides brasiliensis (strain Pb18) OX=502780 GN=PADG_03863 PE=4 SV=2
C1GL30	1.2413	0.109569	2181	0.000165064	0.000204894	Uncharacterized protein OS=Paracoccidioides brasiliensis (strain Pb18) OX=502780 GN=PADG_08037 PE=4 SV=1
C1FYM0	1.2419	0.113463	916	0.000143539	0.000178261	Uncharacterized protein OS=Paracoccidioides brasiliensis (strain Pb18) OX=502780 GN=PADG_00896 PE=3 SV=2
A0A0A0HTN8	1.24302	0.0633248	2504	0.000193078	0.000239999	Uncharacterized protein OS=Paracoccidioides brasiliensis (strain Pb18) OX=502780 GN=PADG_11804 PE=4 SV=1
C1GHV7	1.24355	0.0436882	2356	0.000278868	0.000346786	V-type proton ATPase subunit OS=Paracoccidioides brasiliensis (strain Pb18) OX=502780 GN=PADG_06843 PE=3 SV=1
C1GMG0	1.2436	0.0527144	1646	0.000265047	0.000329613	Uncharacterized protein OS=Paracoccidioides brasiliensis (strain Pb18) OX=502780 GN=PADG_08446 PE=4 SV=1
C1FZY5	1.24467	0.015476	867	0.000256644	0.000319438	Uncharacterized protein OS=Paracoccidioides brasiliensis (strain Pb18) OX=502780 GN=PADG_00175 PE=4 SV=2
C1G4X6	1.24576	0.191185	962	0.000142856	0.000177965	Uncharacterized protein OS=Paracoccidioides brasiliensis (strain Pb18) OX=502780 GN=PADG_01992 PE=3 SV=2
C1FYD8	1.24756	0.133867	2091	0.000142517	0.000177798	Branchpoint-bridging protein OS=Paracoccidioides brasiliensis (strain Pb18) OX=502780 GN=PADG_00814 PE=4 SV=1
C1G4C3	1.24809	0.0384905	2326	0.000327845	0.00040918	Anthranilate phosphoribosyltransferase OS=Paracoccidioides brasiliensis (strain Pb18) OX=502780 GN=PADG_01789 PE=4 SV=2
C1G4X8	1.24833	0.0845675	1354	7.12645e-05	8.89619e-05	Uncharacterized protein OS=Paracoccidioides brasiliensis (strain Pb18) OX=502780 GN=PADG_01994 PE=4 SV=2
C1GCZ4	1.24834	0.03842	1221	0.000377148	0.000470811	Uncharacterized protein OS=Paracoccidioides brasiliensis (strain Pb18) OX=502780 GN=PADG_05130 PE=3 SV=2
C1G0V3	1.24883	0.228794	1368	0.000156966	0.000196024	Uncharacterized protein OS=Paracoccidioides brasiliensis (strain Pb18) OX=502780 GN=PADG_00493 PE=4 SV=2
C1G713	1.24909	0.158477	2598	0.000192915	0.000240967	NAD(P)(+) transhydrogenase (AB-specific), alpha subunit OS=Paracoccidioides brasiliensis (strain Pb18) OX=502780 GN=PADG_02968 PE=4 SV=2
C1G611	1.24998	0.0441385	2523	0.000163648	0.000204557	Uncharacterized protein OS=Paracoccidioides brasiliensis (strain Pb18) OX=502780 GN=PADG_02616 PE=4 SV=2
C1GLX3	1.25244	0.2022	1006	9.2447e-05	0.000115784	Uncharacterized protein OS=Paracoccidioides brasiliensis (strain Pb18) OX=502780 GN=PADG_08364 PE=4 SV=1
C1GI29	1.25317	0.0929025	528	0.000184248	0.000230895	Uncharacterized protein OS=Paracoccidioides brasiliensis (strain Pb18) OX=502780 GN=PADG_06915 PE=3 SV=1
C1G7Q8	1.25341	0.0642557	157	0.000184837	0.000231676	5-formyltetrahydrofolate cyclo-ligase OS=Paracoccidioides brasiliensis (strain Pb18) OX=502780 GN=PADG_03213 PE=4 SV=1
C1G7R4	1.25709	0.0798553	526	0.000205482	0.00025831	Uncharacterized protein OS=Paracoccidioides brasiliensis (strain Pb18) OX=502780 GN=PADG_03219 PE=4 SV=2
C1GLM1	1.25741	0.0256629	1176	0.000553249	0.000695658	Asparagine synthase (Glutamine-hydrolyzing) OS=Paracoccidioides brasiliensis (strain Pb18) OX=502780 GN=PADG_08262 PE=4 SV=2
C1GKA3	1.25747	0.0309401	2365	0.000318126	0.000400035	Uncharacterized protein OS=Paracoccidioides brasiliensis (strain Pb18) OX=502780 GN=PADG_07689 PE=4 SV=1
C1G456	1.25808	0.194513	2143	9.19675e-05	0.000115702	Uncharacterized protein OS=Paracoccidioides brasiliensis (strain Pb18) OX=502780 GN=PADG_01722 PE=4 SV=1
C1GAT9	1.25839	0.14905	1010	8.4643e-05	0.000106513	Uncharacterized protein OS=Paracoccidioides brasiliensis (strain Pb18) OX=502780 GN=PADG_04375 PE=3 SV=2
C1GDK7	1.25985	0.121281	1281	0.000246761	0.000310882	Uncharacterized protein OS=Paracoccidioides brasiliensis (strain Pb18) OX=502780 GN=PADG_05343 PE=4 SV=2
C1GJP0	1.26054	0.0739268	615	9.19039e-05	0.000115848	Uncharacterized protein OS=Paracoccidioides brasiliensis (strain Pb18) OX=502780 GN=PADG_07476 PE=4 SV=1
C1G8V1	1.26076	0.155779	1702	0.000247954	0.000312611	Uncharacterized protein OS=Paracoccidioides brasiliensis (strain Pb18) OX=502780 GN=PADG_03687 PE=4 SV=1
C1GL57	1.26087	0.115659	2722	0.000266984	0.000336632	Ubiquitin-like modifier-activating enzyme ATG7 OS=Paracoccidioides brasiliensis (strain Pb18) OX=502780 GN=PADG_07843 PE=3 SV=1
C1GMW7	1.26307	0.0800357	1205	0.000463653	0.000585625	Uncharacterized protein OS=Paracoccidioides brasiliensis (strain Pb18) OX=502780 GN=PADG_08618 PE=4 SV=1
C1GID6	1.26337	0.161178	1466	8.75405e-05	0.000110596	Uncharacterized protein OS=Paracoccidioides brasiliensis (strain Pb18) OX=502780 GN=PADG_07022 PE=4 SV=2
C1GEG2	1.26389	0.0271976	1705	0.000133623	0.000168885	Uncharacterized protein OS=Paracoccidioides brasiliensis (strain Pb18) OX=502780 GN=PADG_05648 PE=4 SV=2
C1GJ36	1.26558	0.0492574	2929	0.000336599	0.000425993	Uncharacterized protein OS=Paracoccidioides brasiliensis (strain Pb18) OX=502780 GN=PADG_07272 PE=4 SV=2
C1GH86	1.26596	0.19482	1744	0.000162631	0.000205885	Uncharacterized protein OS=Paracoccidioides brasiliensis (strain Pb18) OX=502780 GN=PADG_06622 PE=4 SV=1
C1GIY1	1.26618	0.0882245	1259	0.000245942	0.000311406	Uncharacterized protein OS=Paracoccidioides brasiliensis (strain Pb18) OX=502780 GN=PADG_07217 PE=4 SV=2
C1GFX8	1.26625	0.0388536	1229	0.000421988	0.000534341	Cation-transporting ATPase OS=Paracoccidioides brasiliensis (strain Pb18) OX=502780 GN=PADG_06164 PE=3 SV=2
C1G7T2	1.26707	0.174686	248	0.000153444	0.000194424	Uncharacterized protein OS=Paracoccidioides brasiliensis (strain Pb18) OX=502780 GN=PADG_03237 PE=4 SV=2
C1GLQ2	1.26715	0.273955	1703	0.000102933	0.000130432	Uncharacterized protein OS=Paracoccidioides brasiliensis (strain Pb18) OX=502780 GN=PADG_08293 PE=4 SV=2
C1GLI4	1.26739	0.0464153	2497	0.000132856	0.00016838	Glucosamine 6-phosphate N-acetyltransferase OS=Paracoccidioides brasiliensis (strain Pb18) OX=502780 GN=PADG_08120 PE=3 SV=1
C1G4M5	1.26866	0.0920775	132	0.000307347	0.000389919	Translation initiation factor RLI1 OS=Paracoccidioides brasiliensis (strain Pb18) OX=502780 GN=PADG_01891 PE=4 SV=2
C1G952	1.26883	0.208586	2764	8.37474e-05	0.000106261	Uncharacterized protein OS=Paracoccidioides brasiliensis (strain Pb18) OX=502780 GN=PADG_03788 PE=4 SV=1
C1GKM4	1.26949	0.041154	1951	0.00046325	0.000588093	Uncharacterized protein OS=Paracoccidioides brasiliensis (strain Pb18) OX=502780 GN=PADG_07810 PE=4 SV=1
C1GE49	1.26996	0.0311079	954	0.000153923	0.000195475	Uncharacterized protein OS=Paracoccidioides brasiliensis (strain Pb18) OX=502780 GN=PADG_05535 PE=3 SV=2
C1GA10	1.271	0.150092	2113	0.000174638	0.000221965	ATP-dependent RNA helicase DED1 OS=Paracoccidioides brasiliensis (strain Pb18) OX=502780 GN=PADG_04096 PE=3 SV=1
A0A0A0HX33	1.27206	0.0519119	2314	0.000452792	0.00057598	Actin-related protein 8 OS=Paracoccidioides brasiliensis (strain Pb18) OX=502780 GN=PADG_11081 PE=3 SV=1
C1G2I6	1.273	0.0638068	144	0.000174626	0.000222298	Uncharacterized protein OS=Paracoccidioides brasiliensis (strain Pb18) OX=502780 GN=PADG_02352 PE=4 SV=1
C1GL49	1.2749	0.100351	172	0.000257187	0.00032789	Replication protein A subunit OS=Paracoccidioides brasiliensis (strain Pb18) OX=502780 GN=PADG_07835 PE=3 SV=1
C1GL47	1.27537	0.155417	201	0.000223667	0.000285258	Uncharacterized protein OS=Paracoccidioides brasiliensis (strain Pb18) OX=502780 GN=PADG_07833 PE=4 SV=2
A0A0A0HYT2	1.2771	0.0669633	865	0.000307066	0.000392153	Signal recognition particle subunit SRP72 OS=Paracoccidioides brasiliensis (strain Pb18) OX=502780 GN=PADG_11353 PE=3 SV=1
C1GBM3	1.27721	0.0958255	2485	0.000132856	0.000169684	Uncharacterized protein OS=Paracoccidioides brasiliensis (strain Pb18) OX=502780 GN=PADG_05024 PE=3 SV=2
C1GHW1	1.27824	0.217035	2786	8.32138e-05	0.000106367	Uncharacterized protein OS=Paracoccidioides brasiliensis (strain Pb18) OX=502780 GN=PADG_06847 PE=4 SV=1
C1GA28	1.27888	0.0647848	2094	0.000257047	0.000328732	L-serine dehydratase/L-threonine deaminase OS=Paracoccidioides brasiliensis (strain Pb18) OX=502780 GN=PADG_04114 PE=4 SV=2
A0A0A0HWB1	1.27919	0.0592503	2452	0.00047364	0.000605876	E3 ubiquitin-protein ligase OS=Paracoccidioides brasiliensis (strain Pb18) OX=502780 GN=PADG_11533 PE=4 SV=1
C1G1Y7	1.2805	0.0892029	784	0.000193961	0.000248367	Mitogen-activated protein kinase OS=Paracoccidioides brasiliensis (strain Pb18) OX=502780 GN=PADG_02153 PE=3 SV=2
C1GFP4	1.28143	0.0540894	548	0.000153219	0.00019634	Uncharacterized protein OS=Paracoccidioides brasiliensis (strain Pb18) OX=502780 GN=PADG_06080 PE=4 SV=1
C1GDS1	1.28164	0.15414	239	0.000186421	0.000238925	Uncharacterized protein OS=Paracoccidioides brasiliensis (strain Pb18) OX=502780 GN=PADG_05407 PE=4 SV=1
A0A0A0HV88	1.28326	0.203003	2151	0.000104644	0.000134285	AGC/RSK/RSK-UNCLASSIFIED protein kinase OS=Paracoccidioides brasiliensis (strain Pb18) OX=502780 GN=PADG_11939 PE=4 SV=1
C1GAB9	1.28525	0.0993225	275	0.000152042	0.000195412	Uncharacterized protein OS=Paracoccidioides brasiliensis (strain Pb18) OX=502780 GN=PADG_04205 PE=4 SV=2
C1G7T3	1.28679	0.137911	1350	0.000152843	0.000196677	Chaperone DnaJ OS=Paracoccidioides brasiliensis (strain Pb18) OX=502780 GN=PADG_03238 PE=3 SV=1
C1G750	1.28809	0.143628	2721	0.000144101	0.000185615	Uncharacterized protein OS=Paracoccidioides brasiliensis (strain Pb18) OX=502780 GN=PADG_03005 PE=4 SV=1
C1G5Y2	1.28839	0.145663	601	0.000165444	0.000213156	Uncharacterized protein OS=Paracoccidioides brasiliensis (strain Pb18) OX=502780 GN=PADG_02587 PE=4 SV=1
C1GIA8	1.28899	0.140546	1065	0.000102658	0.000132325	Uncharacterized protein OS=Paracoccidioides brasiliensis (strain Pb18) OX=502780 GN=PADG_06994 PE=3 SV=2
C1GHJ8	1.29344	0.267791	1403	0.000155943	0.000201703	Uncharacterized protein OS=Paracoccidioides brasiliensis (strain Pb18) OX=502780 GN=PADG_06734 PE=4 SV=2
C1G1L3	1.29649	0.13363	975	0.000164051	0.00021269	Uncharacterized protein OS=Paracoccidioides brasiliensis (strain Pb18) OX=502780 GN=PADG_00753 PE=3 SV=2
C1G5Q5	1.29672	0.168966	2161	0.00014444	0.000187299	Uncharacterized protein OS=Paracoccidioides brasiliensis (strain Pb18) OX=502780 GN=PADG_02510 PE=4 SV=2
C1GEP5	1.3015	0.117023	1260	0.000245712	0.000319794	Uncharacterized protein OS=Paracoccidioides brasiliensis (strain Pb18) OX=502780 GN=PADG_05731 PE=3 SV=1
A0A0A0HW16	1.30299	0.172356	675	0.000118315	0.000154162	Uncharacterized protein OS=Paracoccidioides brasiliensis (strain Pb18) OX=502780 GN=PADG_11749 PE=4 SV=1
C1G877	1.30827	0.0807813	885	8.16417e-05	0.00010681	Uncharacterized protein OS=Paracoccidioides brasiliensis (strain Pb18) OX=502780 GN=PADG_03382 PE=4 SV=2
C1G6T8	1.31552	0.148009	1798	6.74334e-05	8.871e-05	Uncharacterized protein OS=Paracoccidioides brasiliensis (strain Pb18) OX=502780 GN=PADG_02893 PE=4 SV=2
C1G8R0	1.31584	0.125085	1286	0.00021602	0.000284249	CMGC/SRPK protein kinase OS=Paracoccidioides brasiliensis (strain Pb18) OX=502780 GN=PADG_03646 PE=4 SV=2
C1G4J6	1.31781	0.198755	1666	0.000101565	0.000133843	Uncharacterized protein OS=Paracoccidioides brasiliensis (strain Pb18) OX=502780 GN=PADG_01862 PE=4 SV=1
C1GB66	1.32057	0.119587	986	0.000133936	0.000176872	Uncharacterized protein OS=Paracoccidioides brasiliensis (strain Pb18) OX=502780 GN=PADG_04867 PE=4 SV=1

## Sheet: Orange
Protein id	Fold Change	pValue	GPI (Index in the sparse matrix)	Signal(Bottom)	Signal(Top)	Description
C1GFV0	-2.98291	0.0037721	2085	0.000132683	4.4481e-05	Uncharacterized protein OS=Paracoccidioides brasiliensis (strain Pb18) OX=502780 GN=PADG_06136 PE=4 SV=2
C1GLY2	-2.92574	0.00110527	1704	0.000206523	7.05884e-05	Uncharacterized protein OS=Paracoccidioides brasiliensis (strain Pb18) OX=502780 GN=PADG_08373 PE=4 SV=1
C1G8M6	-2.76571	0.00489518	1407	0.000172439	6.23489e-05	Uncharacterized protein OS=Paracoccidioides brasiliensis (strain Pb18) OX=502780 GN=PADG_03612 PE=4 SV=1
C1GD47	-2.5412	0.0001123	2527	0.000113035	4.4481e-05	Glutaredoxin OS=Paracoccidioides brasiliensis (strain Pb18) OX=502780 GN=PADG_05183 PE=3 SV=1
C1GMB1	-2.45742	0.00464228	1773	0.000175379	7.13673e-05	Uncharacterized protein OS=Paracoccidioides brasiliensis (strain Pb18) OX=502780 GN=PADG_08197 PE=4 SV=1
C1GAW6	-2.41662	0.00158016	1016	0.000193193	7.99436e-05	60S ribosomal protein L34-A OS=Paracoccidioides brasiliensis (strain Pb18) OX=502780 GN=PADG_04402 PE=4 SV=1
C1G416	-2.30931	1e-05	632	0.000102508	4.4389e-05	Uncharacterized protein OS=Paracoccidioides brasiliensis (strain Pb18) OX=502780 GN=PADG_01682 PE=4 SV=1
A0A0A0HUI8	-2.22732	0.00120298	71	0.000258128	0.000115891	Histone H2A.Z OS=Paracoccidioides brasiliensis (strain Pb18) OX=502780 GN=PADG_11421 PE=3 SV=1
C1G9I8	-2.15225	3.34095e-05	2067	0.00028761	0.000133632	PRA1 family protein OS=Paracoccidioides brasiliensis (strain Pb18) OX=502780 GN=PADG_03924 PE=3 SV=1
C1G5L3	-2.02014	0.00319788	585	0.00023403	0.000115848	Uncharacterized protein OS=Paracoccidioides brasiliensis (strain Pb18) OX=502780 GN=PADG_02468 PE=4 SV=1
C1G7A9	-1.97596	0.00223155	1786	0.000193731	9.80438e-05	Uncharacterized protein OS=Paracoccidioides brasiliensis (strain Pb18) OX=502780 GN=PADG_03064 PE=4 SV=1
C1G9Y0	-1.89081	0.000750989	1028	0.000194562	0.000102899	Uncharacterized protein OS=Paracoccidioides brasiliensis (strain Pb18) OX=502780 GN=PADG_04066 PE=4 SV=1
C1GK40	-1.87384	0.00360518	166	0.000266907	0.000142438	Uncharacterized protein OS=Paracoccidioides brasiliensis (strain Pb18) OX=502780 GN=PADG_07626 PE=4 SV=2
C1FYH6	-1.83535	0.00191622	1792	0.000195105	0.000106304	Uncharacterized protein OS=Paracoccidioides brasiliensis (strain Pb18) OX=502780 GN=PADG_00852 PE=4 SV=1
C1G2P4	-1.80814	0.00372525	899	0.000225891	0.00012493	Protein RER1 OS=Paracoccidioides brasiliensis (strain Pb18) OX=502780 GN=PADG_01210 PE=3 SV=1
C1GBG5	-1.73826	0.00271557	2723	0.000154639	8.89619e-05	Uncharacterized protein OS=Paracoccidioides brasiliensis (strain Pb18) OX=502780 GN=PADG_04966 PE=4 SV=1
C1G5K9	-1.65908	0.00506188	595	0.000206083	0.000124215	Uncharacterized protein OS=Paracoccidioides brasiliensis (strain Pb18) OX=502780 GN=PADG_02464 PE=4 SV=2
C1G3V4	-1.63839	0.00571568	967	0.000217666	0.000132854	Uncharacterized protein OS=Paracoccidioides brasiliensis (strain Pb18) OX=502780 GN=PADG_01620 PE=4 SV=1
C1G3T9	-1.61428	0.000380934	818	0.000143609	8.89619e-05	Polyubiquitin OS=Paracoccidioides brasiliensis (strain Pb18) OX=502780 GN=PADG_01605 PE=4 SV=2
C1FZ84	-1.577	0.00728085	1722	0.00019499	0.000123646	Uncharacterized protein OS=Paracoccidioides brasiliensis (strain Pb18) OX=502780 GN=PADG_01110 PE=4 SV=1
C1G895	-1.55715	0.00561814	1360	0.000102658	6.59265e-05	Uncharacterized protein OS=Paracoccidioides brasiliensis (strain Pb18) OX=502780 GN=PADG_03400 PE=4 SV=2
C1GMR4	-1.54222	0.00110955	1469	0.000221502	0.000143626	DNA replication licensing factor MCM7 OS=Paracoccidioides brasiliensis (strain Pb18) OX=502780 GN=MCM7 PE=3 SV=1
C1GIQ4	-1.49397	0.00240161	1721	0.000266191	0.000178176	Uncharacterized protein OS=Paracoccidioides brasiliensis (strain Pb18) OX=502780 GN=PADG_07140 PE=4 SV=1
C1G8M0	-1.46186	0.00370599	1794	0.000156446	0.000107019	Uncharacterized protein OS=Paracoccidioides brasiliensis (strain Pb18) OX=502780 GN=PADG_03606 PE=3 SV=2
C1G9X9	-1.45595	0.00373745	958	0.000194286	0.000133443	60S ribosomal protein L36 OS=Paracoccidioides brasiliensis (strain Pb18) OX=502780 GN=PADG_04065 PE=3 SV=2
Q1XAA6	-1.44633	2.36939e-05	2705	0.000205315	0.000141956	NADH-ubiquinone oxidoreductase chain 5 OS=Paracoccidioides brasiliensis (strain Pb18) OX=502780 GN=nad5 PE=3 SV=1
C1G181	-1.41213	0.00227402	2034	0.000276516	0.000195815	Hydroxyisourate hydrolase OS=Paracoccidioides brasiliensis (strain Pb18) OX=502780 GN=PADG_00621 PE=4 SV=1
C1G1L9	-1.39846	0.00369627	2084	0.000173974	0.000124404	Prefoldin subunit 4 OS=Paracoccidioides brasiliensis (strain Pb18) OX=502780 GN=PADG_00759 PE=3 SV=1
C1FYZ5	-1.35998	0.00696579	204	0.00026653	0.000195981	Uncharacterized protein OS=Paracoccidioides brasiliensis (strain Pb18) OX=502780 GN=PADG_01021 PE=4 SV=2
C1GLH3	-1.32848	0.00633237	948	0.000153987	0.000115912	Autophagy-related protein OS=Paracoccidioides brasiliensis (strain Pb18) OX=502780 GN=PADG_08109 PE=3 SV=1
C1GFK0	-1.24213	0.00839287	184	0.000276516	0.000222614	Uncharacterized protein OS=Paracoccidioides brasiliensis (strain Pb18) OX=502780 GN=PADG_06036 PE=4 SV=2
A0A0A0HVX8	-1.18101	0.00021966	2114	5.23221e-05	4.43028e-05	Uncharacterized protein OS=Paracoccidioides brasiliensis (strain Pb18) OX=502780 GN=PADG_11729 PE=4 SV=1
C1GJM0	-1.17866	4.44231e-05	1815	5.24281e-05	4.4481e-05	Ribosomal protein L27 OS=Paracoccidioides brasiliensis (strain Pb18) OX=502780 GN=PADG_07456 PE=4 SV=1
C1GMI4	-1.1784	0.000264896	312	5.22364e-05	4.43283e-05	Uncharacterized protein OS=Paracoccidioides brasiliensis (strain Pb18) OX=502780 GN=PADG_08470 PE=3 SV=1
C1G8X1	-1.17238	1.08916e-05	2576	5.21488e-05	4.4481e-05	Uncharacterized protein OS=Paracoccidioides brasiliensis (strain Pb18) OX=502780 GN=PADG_03707 PE=4 SV=1
C1G3N3	-1.16	0.000267596	2561	0.000102658	8.84978e-05	Uncharacterized protein OS=Paracoccidioides brasiliensis (strain Pb18) OX=502780 GN=PADG_01549 PE=4 SV=2
C1GJ96	-1.15685	0.000983583	2148	5.11896e-05	4.42489e-05	Uncharacterized protein OS=Paracoccidioides brasiliensis (strain Pb18) OX=502780 GN=PADG_07332 PE=4 SV=1
C1G6V3	-1.15405	0.000375428	2129	0.000102667	8.89619e-05	Uncharacterized protein OS=Paracoccidioides brasiliensis (strain Pb18) OX=502780 GN=PADG_02908 PE=4 SV=1
C1GMC8	-1.15395	0.000100631	1730	0.000153987	0.000133443	Uncharacterized protein OS=Paracoccidioides brasiliensis (strain Pb18) OX=502780 GN=PADG_08214 PE=4 SV=1
C1G201	-1.15395	0.000100631	584	0.000102658	8.89619e-05	MICOS complex subunit MIC10 OS=Paracoccidioides brasiliensis (strain Pb18) OX=502780 GN=PADG_02167 PE=3 SV=2
C1GIQ9	-1.15395	0.000100631	2552	5.13289e-05	4.4481e-05	Uncharacterized protein OS=Paracoccidioides brasiliensis (strain Pb18) OX=502780 GN=PADG_07145 PE=4 SV=1
C1GF00	-1.15395	0.000100631	2767	5.13289e-05	4.4481e-05	60S ribosomal protein L39 OS=Paracoccidioides brasiliensis (strain Pb18) OX=502780 GN=PADG_05836 PE=4 SV=2
Q1XA99	-1.15395	0.000100631	260	5.13289e-05	4.4481e-05	ATP synthase F0 subunit 8 OS=Paracoccidioides brasiliensis (strain Pb18) OX=502780 GN=atp8 PE=4 SV=1
C1GLQ1	-1.15395	0.000100631	219	0.000102658	8.89619e-05	Uncharacterized protein OS=Paracoccidioides brasiliensis (strain Pb18) OX=502780 GN=PADG_08292 PE=4 SV=2
C1G126	-1.15395	0.000100631	996	5.13289e-05	4.4481e-05	Uncharacterized protein OS=Paracoccidioides brasiliensis (strain Pb18) OX=502780 GN=PADG_00566 PE=4 SV=1
C1G6L8	-1.15395	0.000100631	1742	5.13289e-05	4.4481e-05	Uncharacterized protein OS=Paracoccidioides brasiliensis (strain Pb18) OX=502780 GN=PADG_02823 PE=4 SV=2
Q1XAA1	-1.15395	0.000100631	1427	5.13289e-05	4.4481e-05	NADH-ubiquinone oxidoreductase chain 1 OS=Paracoccidioides brasiliensis (strain Pb18) OX=502780 GN=nad1 PE=3 SV=1
C1G4B1	-1.15227	0.00039625	2166	5.12539e-05	4.4481e-05	GPN-loop GTPase OS=Paracoccidioides brasiliensis (strain Pb18) OX=502780 GN=PADG_01777 PE=3 SV=1
C1GJL9	-1.15178	0.000397813	2545	5.13289e-05	4.45647e-05	Long chronological lifespan protein 2 OS=Paracoccidioides brasiliensis (strain Pb18) OX=502780 GN=LCL2 PE=3 SV=1
C1G999	-1.14024	0.000199971	638	5.07188e-05	4.4481e-05	Uncharacterized protein OS=Paracoccidioides brasiliensis (strain Pb18) OX=502780 GN=PADG_03835 PE=4 SV=1
C1GIJ4	-1.12808	0.000432363	2750	5.07188e-05	4.49602e-05	Uncharacterized protein OS=Paracoccidioides brasiliensis (strain Pb18) OX=502780 GN=PADG_07080 PE=4 SV=1
C1GLJ7	1.29988	1e-05	2539	0.000102658	0.000133443	40S ribosomal protein S26 OS=Paracoccidioides brasiliensis (strain Pb18) OX=502780 GN=PADG_08238 PE=3 SV=1
C1GAW1	1.35201	0.00503359	2719	0.000164312	0.000222152	Cytochrome c oxidase subunit 4, mitochondrial OS=Paracoccidioides brasiliensis (strain Pb18) OX=502780 GN=PADG_04397 PE=4 SV=2
C1GGY2	1.36602	0.000964581	179	0.00019499	0.00026636	Uncharacterized protein OS=Paracoccidioides brasiliensis (strain Pb18) OX=502780 GN=PADG_06201 PE=4 SV=1
C1G7U2	1.39799	0.00189313	2717	0.000184184	0.000257488	Uncharacterized protein OS=Paracoccidioides brasiliensis (strain Pb18) OX=502780 GN=PADG_03247 PE=4 SV=1
C1FZN8	1.45278	0.00503905	197	0.000153219	0.000222594	Uncharacterized protein OS=Paracoccidioides brasiliensis (strain Pb18) OX=502780 GN=PADG_00078 PE=4 SV=1
C1GB29	1.46126	0.00171928	1318	0.000127586	0.000186437	Uncharacterized protein OS=Paracoccidioides brasiliensis (strain Pb18) OX=502780 GN=PADG_04830 PE=3 SV=2
C1GF49	1.4624	0.0051739	1658	0.0001643	0.000240273	Uncharacterized protein OS=Paracoccidioides brasiliensis (strain Pb18) OX=502780 GN=PADG_05885 PE=4 SV=2
C1GFK2	1.48228	0.00546993	2735	0.00017391	0.000257784	COP9 signalosome complex subunit 2 OS=Paracoccidioides brasiliensis (strain Pb18) OX=502780 GN=PADG_06038 PE=4 SV=2
C1G9Y2	1.5075	0.00133546	1273	0.000176996	0.000266822	Uncharacterized protein OS=Paracoccidioides brasiliensis (strain Pb18) OX=502780 GN=PADG_04068 PE=4 SV=2
C1GD97	1.59005	0.00768364	645	0.000122593	0.000194929	Malic enzyme OS=Paracoccidioides brasiliensis (strain Pb18) OX=502780 GN=PADG_05233 PE=3 SV=2
C1GBL0	1.59295	0.000647593	1277	0.000184248	0.000293499	Peptidyl-prolyl cis-trans isomerase OS=Paracoccidioides brasiliensis (strain Pb18) OX=502780 GN=PADG_05011 PE=3 SV=2
C1GBF4	1.59825	0.00759756	1649	0.000144152	0.000230392	Uncharacterized protein OS=Paracoccidioides brasiliensis (strain Pb18) OX=502780 GN=PADG_04955 PE=4 SV=2
C1GH87	1.6365	0.00800754	156	0.000152332	0.000249291	Uncharacterized protein OS=Paracoccidioides brasiliensis (strain Pb18) OX=502780 GN=PADG_06623 PE=4 SV=1
C1G7L7	1.64409	0.00823754	2154	0.000102658	0.000168779	Methylenetetrahydrofolate reductase OS=Paracoccidioides brasiliensis (strain Pb18) OX=502780 GN=PADG_03172 PE=3 SV=1
Q1XA91	1.66481	0.00139268	1287	0.00012253	0.000203988	Cytochrome c oxidase subunit 2 OS=Paracoccidioides brasiliensis (strain Pb18) OX=502780 GN=cox2 PE=3 SV=1
C1G0P8	1.66487	0.000453995	1684	0.000133284	0.000221899	Eukaryotic translation initiation factor 3 subunit G OS=Paracoccidioides brasiliensis (strain Pb18) OX=502780 GN=TIF35 PE=3 SV=1
C1GI59	1.67459	0.00506715	906	0.000175278	0.00029352	Uncharacterized protein OS=Paracoccidioides brasiliensis (strain Pb18) OX=502780 GN=PADG_06945 PE=4 SV=2
C1G3X1	1.67837	0.00635719	576	0.000143284	0.000240485	Uncharacterized protein OS=Paracoccidioides brasiliensis (strain Pb18) OX=502780 GN=PADG_01637 PE=4 SV=1
A0A0A0HV65	1.68777	0.00577864	2147	0.000163596	0.000276114	Ubiquitin-conjugating enzyme variant MMS2 OS=Paracoccidioides brasiliensis (strain Pb18) OX=502780 GN=PADG_11319 PE=3 SV=1
C1G3I8	1.72032	0.00124391	552	0.000103425	0.000177924	UDP-N-acetylglucosamine transferase subunit ALG13 OS=Paracoccidioides brasiliensis (strain Pb18) OX=502780 GN=ALG13 PE=3 SV=1
C1G1X7	1.72559	0.00767718	1397	9.26198e-05	0.000159824	Uncharacterized protein OS=Paracoccidioides brasiliensis (strain Pb18) OX=502780 GN=PADG_02143 PE=4 SV=1
C1G129	1.72577	0.00127207	1298	0.000154464	0.000266569	5'/3'-nucleotidase SurE OS=Paracoccidioides brasiliensis (strain Pb18) OX=502780 GN=PADG_00569 PE=4 SV=2
C1G905	1.72596	0.00674044	1687	6.15911e-05	0.000106304	Uncharacterized protein OS=Paracoccidioides brasiliensis (strain Pb18) OX=502780 GN=PADG_03741 PE=4 SV=1
C1GA11	1.72618	0.000657571	625	0.00011345	0.000195835	Uncharacterized protein OS=Paracoccidioides brasiliensis (strain Pb18) OX=502780 GN=PADG_04097 PE=4 SV=1
C1G7M1	1.73066	0.0071993	1258	0.000113412	0.000196277	Uncharacterized protein OS=Paracoccidioides brasiliensis (strain Pb18) OX=502780 GN=PADG_03176 PE=4 SV=2
C1GB21	1.73318	1e-05	2549	5.13289e-05	8.89619e-05	Uncharacterized protein OS=Paracoccidioides brasiliensis (strain Pb18) OX=502780 GN=PADG_04457 PE=4 SV=1
C1GCY8	1.7359	8.49524e-05	2481	0.000143609	0.000249291	Prefoldin subunit 3 OS=Paracoccidioides brasiliensis (strain Pb18) OX=502780 GN=PADG_05124 PE=3 SV=1
C1G7K1	1.737	0.00424452	550	0.00011774	0.000204514	Uncharacterized protein OS=Paracoccidioides brasiliensis (strain Pb18) OX=502780 GN=PADG_03156 PE=4 SV=2
C1GA18	1.73788	0.00122515	910	9.22805e-05	0.000160372	Uncharacterized protein OS=Paracoccidioides brasiliensis (strain Pb18) OX=502780 GN=PADG_04104 PE=4 SV=2
C1G297	1.74281	0.00113759	1657	0.000153147	0.000266906	1-(5-phosphoribosyl)-5-[(5-phosphoribosylamino)methylideneamino] imidazole-4-carboxamide isomerase OS=Paracoccidioides brasiliensis (strain Pb18) OX=502780 GN=PADG_02263 PE=3 SV=1
C1G7F9	1.74367	0.00154387	1285	0.000153495	0.000267644	Phospho-2-dehydro-3-deoxyheptonate aldolase OS=Paracoccidioides brasiliensis (strain Pb18) OX=502780 GN=PADG_03114 PE=3 SV=1
C1G8A3	1.75011	0.00506768	2524	0.000127237	0.000222678	Phosphotransferase OS=Paracoccidioides brasiliensis (strain Pb18) OX=502780 GN=PADG_03408 PE=3 SV=1
C1GB79	1.77651	0.00458646	2521	0.000164689	0.000292572	Mitogen-activated protein kinase OS=Paracoccidioides brasiliensis (strain Pb18) OX=502780 GN=PADG_04880 PE=3 SV=1
C1G4F4	1.84176	0.00287077	2806	0.000101502	0.000186942	Uncharacterized protein OS=Paracoccidioides brasiliensis (strain Pb18) OX=502780 GN=PADG_01820 PE=4 SV=2
C1G1Y1	1.85719	0.00593483	1695	0.000101514	0.00018853	Guanine nucleotide-binding protein alpha-3 subunit OS=Paracoccidioides brasiliensis (strain Pb18) OX=502780 GN=PADG_02147 PE=4 SV=1
C1GGQ6	1.85787	0.0019844	928	0.000152894	0.000284057	Uncharacterized protein OS=Paracoccidioides brasiliensis (strain Pb18) OX=502780 GN=PADG_06493 PE=4 SV=2
C1G6P1	1.86603	0.00210303	231	5.22364e-05	9.74747e-05	Glutaredoxin-like protein OS=Paracoccidioides brasiliensis (strain Pb18) OX=502780 GN=PADG_02846 PE=3 SV=1
C1GB01	1.8681	0.00150173	1716	0.00011452	0.000213935	Uncharacterized protein OS=Paracoccidioides brasiliensis (strain Pb18) OX=502780 GN=PADG_04437 PE=4 SV=2
C1G1E2	1.87149	0.00321396	2156	6.16547e-05	0.000115386	Uncharacterized protein OS=Paracoccidioides brasiliensis (strain Pb18) OX=502780 GN=PADG_00682 PE=4 SV=1
C1GCH8	1.88551	0.0031178	2751	0.000113463	0.000213935	Mitochondrial pyruvate carrier OS=Paracoccidioides brasiliensis (strain Pb18) OX=502780 GN=PADG_04700 PE=3 SV=2
C1G9H6	1.91959	0.00409032	956	8.35557e-05	0.000160393	Uncharacterized protein OS=Paracoccidioides brasiliensis (strain Pb18) OX=502780 GN=PADG_03912 PE=4 SV=1
C1G6X9	1.9235	3.44398e-05	1673	0.000134051	0.000257847	Uncharacterized protein OS=Paracoccidioides brasiliensis (strain Pb18) OX=502780 GN=PADG_02934 PE=4 SV=2
C1GHZ3	1.93383	0.00596792	2162	0.000132856	0.00025692	Uncharacterized protein OS=Paracoccidioides brasiliensis (strain Pb18) OX=502780 GN=PADG_06879 PE=4 SV=1
A0A0A0HQV9	1.96836	0.00566482	1267	0.00013531	0.000266339	Homoserine O-acetyltransferase OS=Paracoccidioides brasiliensis (strain Pb18) OX=502780 GN=PADG_12279 PE=3 SV=1
C1GI58	1.97391	0.000416806	2558	0.000144152	0.000284544	Uncharacterized protein OS=Paracoccidioides brasiliensis (strain Pb18) OX=502780 GN=PADG_06944 PE=4 SV=1
C1G2W9	2.01453	0.00253611	965	0.000132428	0.000266779	Uncharacterized protein OS=Paracoccidioides brasiliensis (strain Pb18) OX=502780 GN=PADG_01285 PE=4 SV=1
C1GKE0	2.02961	0.000649604	2949	0.000104856	0.000212817	Uncharacterized protein OS=Paracoccidioides brasiliensis (strain Pb18) OX=502780 GN=PADG_07726 PE=4 SV=2
C1GJ39	2.07626	0.00318007	1330	0.00010247	0.000212754	Uncharacterized protein OS=Paracoccidioides brasiliensis (strain Pb18) OX=502780 GN=PADG_07275 PE=4 SV=1
C1GE57	2.0778	0.00126274	2783	0.000102658	0.000213302	Protein arginine N-methyltransferase OS=Paracoccidioides brasiliensis (strain Pb18) OX=502780 GN=PADG_05543 PE=3 SV=1
C1G2U7	2.10601	0.000538267	198	0.000101043	0.000212797	Uncharacterized protein OS=Paracoccidioides brasiliensis (strain Pb18) OX=502780 GN=PADG_01263 PE=4 SV=2
C1FZI6	2.10738	0.00318391	1679	6.32019e-05	0.00013319	Cytidine deaminase OS=Paracoccidioides brasiliensis (strain Pb18) OX=502780 GN=PADG_00026 PE=3 SV=1
C1G566	2.12921	0.00309249	882	0.000129264	0.00027523	Uncharacterized protein OS=Paracoccidioides brasiliensis (strain Pb18) OX=502780 GN=PADG_03436 PE=4 SV=1
C1GHX0	2.15187	0.00278656	2120	7.01594e-05	0.000150974	Small nuclear ribonucleoprotein Sm D2 OS=Paracoccidioides brasiliensis (strain Pb18) OX=502780 GN=PADG_06856 PE=3 SV=1
C1G7X3	2.17913	0.00055347	2943	0.000130568	0.000284524	Uncharacterized protein OS=Paracoccidioides brasiliensis (strain Pb18) OX=502780 GN=PADG_03278 PE=4 SV=1
C1G4L1	2.18315	0.0036885	2945	0.000117596	0.000256729	Pre-mRNA-splicing factor CLF1 OS=Paracoccidioides brasiliensis (strain Pb18) OX=502780 GN=PADG_01877 PE=4 SV=2
C1GF52	2.2187	0.003748	559	0.000112331	0.000249229	Aspartokinase OS=Paracoccidioides brasiliensis (strain Pb18) OX=502780 GN=PADG_05888 PE=3 SV=1
C1G8J4	2.2226	0.00137486	507	0.000132479	0.000294448	Uncharacterized protein OS=Paracoccidioides brasiliensis (strain Pb18) OX=502780 GN=PADG_03580 PE=4 SV=1
C1GGI0	2.24049	0.00408944	633	7.13159e-05	0.000159783	Uncharacterized protein OS=Paracoccidioides brasiliensis (strain Pb18) OX=502780 GN=PADG_06417 PE=4 SV=1
C1GK69	2.24346	0.00102676	582	0.000102667	0.000230328	Uncharacterized protein OS=Paracoccidioides brasiliensis (strain Pb18) OX=502780 GN=PADG_07655 PE=4 SV=1
C1GIW6	2.2626	0.00121777	1696	9.02874e-05	0.000204284	Uncharacterized protein OS=Paracoccidioides brasiliensis (strain Pb18) OX=502780 GN=PADG_07202 PE=4 SV=2
C1GGJ9	2.30006	0.000149825	1644	0.000123674	0.000284458	Uncharacterized protein OS=Paracoccidioides brasiliensis (strain Pb18) OX=502780 GN=PADG_06436 PE=4 SV=1
C1GK70	2.3136	0.00311442	522	0.000123361	0.000285407	Uncharacterized protein OS=Paracoccidioides brasiliensis (strain Pb18) OX=502780 GN=PADG_07656 PE=4 SV=1
C1G7C0	2.33433	0.00287211	2165	0.00010247	0.000239198	Uncharacterized protein OS=Paracoccidioides brasiliensis (strain Pb18) OX=502780 GN=PADG_03075 PE=4 SV=1
C1G060	2.36717	0.0061067	2546	5.23221e-05	0.000123856	Uncharacterized protein OS=Paracoccidioides brasiliensis (strain Pb18) OX=502780 GN=PADG_00250 PE=4 SV=2
C1GLU1	2.38207	0.000144056	1667	9.30479e-05	0.000221647	Uncharacterized protein OS=Paracoccidioides brasiliensis (strain Pb18) OX=502780 GN=PADG_08332 PE=3 SV=1
C1GDT3	2.38339	8.68692e-05	1675	0.000122958	0.000293057	UDP-glucose 4-epimerase GalE OS=Paracoccidioides brasiliensis (strain Pb18) OX=502780 GN=PADG_05419 PE=3 SV=1
C1GGL4	2.38733	0.00198338	221	8.90654e-05	0.000212628	Uncharacterized protein OS=Paracoccidioides brasiliensis (strain Pb18) OX=502780 GN=PADG_06451 PE=4 SV=2
A0A0A0HQP5	2.40199	0.000900059	2587	8.86098e-05	0.00021284	Uncharacterized protein OS=Paracoccidioides brasiliensis (strain Pb18) OX=502780 GN=PADG_12329 PE=4 SV=1
C1GG39	2.40465	0.00147054	1283	0.000103626	0.000249184	tRNA N6-adenosine threonylcarbamoyltransferase OS=Paracoccidioides brasiliensis (strain Pb18) OX=502780 GN=KAE1 PE=3 SV=1
C1GJP7	2.45692	0.0042248	924	7.57026e-05	0.000185995	Histone acetyltransferase OS=Paracoccidioides brasiliensis (strain Pb18) OX=502780 GN=PADG_07483 PE=3 SV=2
C1G3I3	2.52775	0.000745274	2689	0.000112759	0.000285027	Uncharacterized protein OS=Paracoccidioides brasiliensis (strain Pb18) OX=502780 GN=PADG_01499 PE=4 SV=2
C1GIR7	2.53818	0.0003115	1698	6.65378e-05	0.000168885	Uncharacterized protein OS=Paracoccidioides brasiliensis (strain Pb18) OX=502780 GN=PADG_07153 PE=3 SV=1
C1G8X7	2.54973	0.00111664	2170	0.000101078	0.000257721	Uncharacterized protein OS=Paracoccidioides brasiliensis (strain Pb18) OX=502780 GN=PADG_03713 PE=4 SV=2
C1G7F7	2.57038	0.000748847	2770	0.000114193	0.000293519	Lysophospholipase OS=Paracoccidioides brasiliensis (strain Pb18) OX=502780 GN=PADG_03112 PE=3 SV=1
C1G3P6	2.5876	0.00110886	912	6.20827e-05	0.000160645	Uncharacterized protein OS=Paracoccidioides brasiliensis (strain Pb18) OX=502780 GN=PADG_01562 PE=4 SV=2
C1G0V2	2.59704	0.000695852	2730	6.16547e-05	0.00016012	Uncharacterized protein OS=Paracoccidioides brasiliensis (strain Pb18) OX=502780 GN=PADG_00492 PE=4 SV=2
C1GA27	2.60078	0.000309597	1295	0.000102667	0.000267013	Uncharacterized protein OS=Paracoccidioides brasiliensis (strain Pb18) OX=502780 GN=PADG_04113 PE=4 SV=1
C1G030	2.62684	5.21711e-05	571	6.09387e-05	0.000160076	Uncharacterized protein OS=Paracoccidioides brasiliensis (strain Pb18) OX=502780 GN=PADG_00220 PE=4 SV=2
C1G5F5	2.71772	1.68025e-05	1688	8.16417e-05	0.000221879	Histone deacetylase OS=Paracoccidioides brasiliensis (strain Pb18) OX=502780 GN=PADG_02410 PE=3 SV=2
C1G021	2.7581	0.000255035	2768	6.77108e-05	0.000186753	Uncharacterized protein OS=Paracoccidioides brasiliensis (strain Pb18) OX=502780 GN=PADG_00211 PE=4 SV=1
C1G2T4	2.78232	0.00630835	2536	9.26198e-05	0.000257698	WD repeat-containing protein JIP5 OS=Paracoccidioides brasiliensis (strain Pb18) OX=502780 GN=PADG_01250 PE=4 SV=1
C1GBK4	2.88231	0.001759	2778	9.2332e-05	0.00026613	Ubiquitin-activating enzyme E1-like OS=Paracoccidioides brasiliensis (strain Pb18) OX=502780 GN=PADG_05005 PE=3 SV=2
C1G9W1	2.89748	0.000318348	1300	5.22364e-05	0.000151354	Serine/threonine-protein phosphatase PP1 OS=Paracoccidioides brasiliensis (strain Pb18) OX=502780 GN=PADG_04047 PE=4 SV=1
C1G4D0	3.19216	5.88303e-05	1274	8.08743e-05	0.000258163	Uncharacterized protein OS=Paracoccidioides brasiliensis (strain Pb18) OX=502780 GN=PADG_01796 PE=4 SV=1
C1G2X1	3.24599	9.16782e-05	521	7.67085e-05	0.000248995	Uncharacterized protein OS=Paracoccidioides brasiliensis (strain Pb18) OX=502780 GN=PADG_01287 PE=4 SV=1
C1G673	3.55501	0.000257574	1674	6.74334e-05	0.000239726	Uncharacterized protein OS=Paracoccidioides brasiliensis (strain Pb18) OX=502780 GN=PADG_02678 PE=4 SV=2
C1GGE2	5.38575	6.50435e-05	1662	5.11896e-05	0.000275694	Uncharacterized protein OS=Paracoccidioides brasiliensis (strain Pb18) OX=502780 GN=PADG_06379 PE=4 SV=2
