# Supplementary material for: Beyond Melanin: Proteomics Reveals Virulence-Related Proteins in Paracoccidioides brasiliensis and Paracoccidioides lutzii Yeast Cells Grown in the Presence of L-Dihydroxyphenylalanine
Source: J Fungi (Basel). 2020 Dec 1;6(4):328. doi: 10.3390/jof6040328 (PMC7711940; doi:10.3390/jof6040328)
Supplement: Supplementary file 1 [file jof-06-00328-s001.zip › TableS2_R1_RHV.xlsx]

## Sheet: Conditions&Volcano Plot
#PatternLab's TFold analyzer
	Blue dots - Identifications satisfied both, the automatic fold and statistical criteria.
#Parameters used:	Green dots - Identifications satisfied the fold criteria but, most likely, this happened by chance (should be disconsidered).
Normalization used: Total Spectral Count	Red dots - Identifications did not meet the fold and p-value criteria (should be disconsidered).
Minimum Replicates PER CLASS = 3	Orange dots - Identifications were filtered out by the L-stringency and so deserve further experimentation to verify if they are indeed differentially expressed.
BH q-value: 0.01; F-stringency: 0.03; L-Stringency: 0.60
#PatternLab Project File: C:\Users\win7_3\Desktop\Marcos_INI_PatternLab\Pb01_Master\PatternLabProjectFile_SC_Proteins_UniquePeptides.plp
#Top Class: Pb01
#Bottom Class: Pb01LD
Negative (-) Fold change = Less abundant in Pb01
Positive (+) Fold change = More abundant in Pb01

## Sheet: Blue
Protein id	Fold Change	pValue	GPI (Index in the sparse matrix)	Signal(Pb01LD)	Signal(Pb01)	Description
contaminant_INT-STD1	-7.04802	1e-05	1926	0.00127522	0.000180932	BSA
C1HA93	-3.43026	1e-05	500	0.000401023	0.000116907	Retinol dehydrogenase OS=Paracoccidioides lutzii (strain ATCC MYA-826 / Pb01) OX=502779 GN=PAAG_07822 PE=3 SV=1
C1HBM5	-3.09842	1e-05	1560	0.000651133	0.00021015	4-hydroxyphenylpyruvate dioxygenase OS=Paracoccidioides lutzii (strain ATCC MYA-826 / Pb01) OX=502779 GN=PAAG_08166 PE=3 SV=1
C1H405	-2.56366	0.000130331	1063	0.000499065	0.000194669	Nucleolar protein NOP58 OS=Paracoccidioides lutzii (strain ATCC MYA-826 / Pb01) OX=502779 GN=PAAG_05498 PE=4 SV=1
C1H8Z0	-2.26532	0.000277323	1640	0.000500359	0.000220878	Ribonuclease T2 OS=Paracoccidioides lutzii (strain ATCC MYA-826 / Pb01) OX=502779 GN=PAAG_07231 PE=3 SV=2
C1HDS4	-2.24588	5.83636e-05	775	0.000790854	0.000352135	Histone H2A OS=Paracoccidioides lutzii (strain ATCC MYA-826 / Pb01) OX=502779 GN=PAAG_08917 PE=3 SV=1
C1GPJ0	-2.22182	0.000277381	1257	0.000929447	0.000418327	(R)-benzylsuccinyl-CoA dehydrogenase OS=Paracoccidioides lutzii (strain ATCC MYA-826 / Pb01) OX=502779 GN=PAAG_00435 PE=3 SV=1
C1H548	-2.14667	0.00551779	1866	0.000389565	0.000181474	GTPase activating protein OS=Paracoccidioides lutzii (strain ATCC MYA-826 / Pb01) OX=502779 GN=PAAG_05889 PE=4 SV=1
C1GS98	-1.9996	1e-05	1283	0.001511	0.000755653	Uncharacterized protein OS=Paracoccidioides lutzii (strain ATCC MYA-826 / Pb01) OX=502779 GN=PAAG_01393 PE=4 SV=1
C1HBM1	-1.9718	0.00176312	2270	0.000486174	0.000246564	Maleylacetoacetate isomerase OS=Paracoccidioides lutzii (strain ATCC MYA-826 / Pb01) OX=502779 GN=PAAG_08162 PE=3 SV=2
C1H4Q3	-1.94001	0.00102924	1330	0.000529009	0.000272684	Aromatic amino acid aminotransferase OS=Paracoccidioides lutzii (strain ATCC MYA-826 / Pb01) OX=502779 GN=PAAG_05743 PE=4 SV=1
C1HAP5	-1.88108	2.36222e-05	1627	0.000831806	0.000442197	Uncharacterized protein OS=Paracoccidioides lutzii (strain ATCC MYA-826 / Pb01) OX=502779 GN=PAAG_07875 PE=4 SV=1
C1HBW0	-1.8408	0.00111079	140	0.000525819	0.000285647	DUF618 domain-containing protein OS=Paracoccidioides lutzii (strain ATCC MYA-826 / Pb01) OX=502779 GN=PAAG_08251 PE=4 SV=2
C1HCP9	-1.83162	0.00230395	155	0.00043052	0.000235048	40S ribosomal protein S25 OS=Paracoccidioides lutzii (strain ATCC MYA-826 / Pb01) OX=502779 GN=PAAG_08540 PE=4 SV=2
C1H1Z0	-1.80813	0.000582655	1562	0.000847035	0.000468458	SAP domain-containing protein OS=Paracoccidioides lutzii (strain ATCC MYA-826 / Pb01) OX=502779 GN=PAAG_04926 PE=4 SV=1
C1HC50	-1.79662	9.85907e-05	1567	0.000679029	0.000377947	Uncharacterized protein OS=Paracoccidioides lutzii (strain ATCC MYA-826 / Pb01) OX=502779 GN=PAAG_08341 PE=4 SV=2
C1HBM3	-1.719	1e-05	1909	0.00255163	0.00148437	Homogentisate 1,2-dioxygenase OS=Paracoccidioides lutzii (strain ATCC MYA-826 / Pb01) OX=502779 GN=PAAG_08164 PE=4 SV=1
C1GYT2	-1.71576	0.00107485	1053	0.000402415	0.00023454	DNA damage-inducible protein OS=Paracoccidioides lutzii (strain ATCC MYA-826 / Pb01) OX=502779 GN=PAAG_03676 PE=4 SV=1
C1H4B2	-1.70398	0.000506492	1296	0.000664161	0.00038977	ATP synthase delta chain OS=Paracoccidioides lutzii (strain ATCC MYA-826 / Pb01) OX=502779 GN=PAAG_05605 PE=3 SV=1
C1HBS6	-1.68913	0.00680478	349	0.000721834	0.000427341	Acetoacetyl-coenzyme A synthetase OS=Paracoccidioides lutzii (strain ATCC MYA-826 / Pb01) OX=502779 GN=PAAG_08217 PE=4 SV=1
C1H0I2	-1.5957	0.000658175	2315	0.00074703	0.000468152	Phosphatidylinositol transporter OS=Paracoccidioides lutzii (strain ATCC MYA-826 / Pb01) OX=502779 GN=PAAG_04276 PE=4 SV=1
C1H182	-1.56464	0.000227853	108	0.000567665	0.00036281	3-beta-hydroxysteroid dehydrogenase OS=Paracoccidioides lutzii (strain ATCC MYA-826 / Pb01) OX=502779 GN=PAAG_04526 PE=4 SV=1
C1H4M5	-1.54685	0.0067902	124	0.000484615	0.000313292	FACT complex subunit POB3 OS=Paracoccidioides lutzii (strain ATCC MYA-826 / Pb01) OX=502779 GN=PAAG_05718 PE=3 SV=2
C1GQG8	-1.51282	0.00481449	1939	0.000790448	0.0005225	Proteasome component PUP3 OS=Paracoccidioides lutzii (strain ATCC MYA-826 / Pb01) OX=502779 GN=PAAG_00763 PE=4 SV=2
C1GTK9	-1.49093	0.00421669	1071	0.00146881	0.000985159	Uncharacterized protein OS=Paracoccidioides lutzii (strain ATCC MYA-826 / Pb01) OX=502779 GN=PAAG_01854 PE=4 SV=2
C1H980	-1.48566	1e-05	57	0.00117784	0.000792806	Pyridoxine biosynthesis protein PDX1 OS=Paracoccidioides lutzii (strain ATCC MYA-826 / Pb01) OX=502779 GN=PAAG_07321 PE=3 SV=1
C1H1X7	-1.48035	0.000284647	525	0.00246984	0.00166842	Uncharacterized protein OS=Paracoccidioides lutzii (strain ATCC MYA-826 / Pb01) OX=502779 GN=PAAG_04913 PE=4 SV=1
A0A0A2V169	-1.47992	1.49421e-05	1906	0.00304061	0.00205458	NAD(P)H:quinone oxidoreductase, type IV OS=Paracoccidioides lutzii (strain ATCC MYA-826 / Pb01) OX=502779 GN=PAAG_12076 PE=4 SV=1
C1GS30	-1.47875	0.00368789	786	0.000443995	0.00030025	Arf gtpase-activating protein OS=Paracoccidioides lutzii (strain ATCC MYA-826 / Pb01) OX=502779 GN=PAAG_01325 PE=4 SV=2
C1H383	-1.47408	4.02657e-05	1937	0.000803576	0.000545136	Hsp90 binding co-chaperone (Sba1) OS=Paracoccidioides lutzii (strain ATCC MYA-826 / Pb01) OX=502779 GN=PAAG_05226 PE=4 SV=2
C1H048	-1.47095	0.00441738	1988	0.00040084	0.000272505	NAD-dependent 15-hydroxyprostaglandin dehydrogenase OS=Paracoccidioides lutzii (strain ATCC MYA-826 / Pb01) OX=502779 GN=PAAG_04142 PE=3 SV=1
C1H945	-1.4674	0.00400372	1618	0.000762329	0.00051951	Vacuolar protein sorting-associated protein OS=Paracoccidioides lutzii (strain ATCC MYA-826 / Pb01) OX=502779 GN=PAAG_07286 PE=3 SV=2
C1H1M8	-1.45954	0.000656362	68	0.00091395	0.000626191	Nucleic acid-binding protein OS=Paracoccidioides lutzii (strain ATCC MYA-826 / Pb01) OX=502779 GN=PAAG_04814 PE=4 SV=2
C1GZ36	-1.45223	0.00449817	1572	0.00051162	0.000352299	ATP-dependent RNA helicase DBP5 OS=Paracoccidioides lutzii (strain ATCC MYA-826 / Pb01) OX=502779 GN=PAAG_03780 PE=3 SV=1
C1GU75	-1.44971	5.87226e-05	1933	0.00109578	0.000755861	Glutaminase A OS=Paracoccidioides lutzii (strain ATCC MYA-826 / Pb01) OX=502779 GN=PAAG_02070 PE=4 SV=1
C1H4C8	-1.44532	0.000367232	33	0.00163555	0.00113162	6-phosphogluconolactonase OS=Paracoccidioides lutzii (strain ATCC MYA-826 / Pb01) OX=502779 GN=PAAG_05621 PE=3 SV=1
C1HAD5	-1.44227	0.00037097	350	0.000804969	0.000558128	SNARE domain-containing protein OS=Paracoccidioides lutzii (strain ATCC MYA-826 / Pb01) OX=502779 GN=PAAG_07589 PE=3 SV=1
C1GPY4	-1.44147	0.00346516	2276	0.000638242	0.000442772	Uncharacterized protein OS=Paracoccidioides lutzii (strain ATCC MYA-826 / Pb01) OX=502779 GN=PAAG_00579 PE=4 SV=1
C1HAM8	-1.42981	0.00650367	1966	0.000611084	0.000427388	Ribonucleoside-diphosphate reductase OS=Paracoccidioides lutzii (strain ATCC MYA-826 / Pb01) OX=502779 GN=PAAG_07682 PE=3 SV=2
C1HDS5	-1.426	0.00151557	1948	0.000761926	0.000534311	Histone H2B OS=Paracoccidioides lutzii (strain ATCC MYA-826 / Pb01) OX=502779 GN=PAAG_08918 PE=3 SV=1
C1GVE0	-1.42359	0.00209611	69	0.000832851	0.000585036	Isochorismatase domain-containing protein OS=Paracoccidioides lutzii (strain ATCC MYA-826 / Pb01) OX=502779 GN=PAAG_02217 PE=4 SV=2
C1GTT1	-1.41202	0.000916024	364	0.000788249	0.00055824	Uncharacterized protein OS=Paracoccidioides lutzii (strain ATCC MYA-826 / Pb01) OX=502779 GN=PAAG_01926 PE=3 SV=2
C1HA73	-1.41123	0.000770895	934	0.0018893	0.00133876	Proteasome subunit alpha type OS=Paracoccidioides lutzii (strain ATCC MYA-826 / Pb01) OX=502779 GN=PAAG_07802 PE=3 SV=1
C1GQC9	-1.3985	0.000663323	1561	0.000581795	0.000416014	Ribosomal protein 11 large subunit OS=Paracoccidioides lutzii (strain ATCC MYA-826 / Pb01) OX=502779 GN=PAAG_00724 PE=3 SV=2
A0A0A2V283	-1.39723	6.50221e-05	1921	0.00168893	0.00120877	Aminopeptidase OS=Paracoccidioides lutzii (strain ATCC MYA-826 / Pb01) OX=502779 GN=PAAG_11728 PE=3 SV=1
C1GYV7	-1.39396	0.00334544	1915	0.00164592	0.00118076	BAR domain-containing protein OS=Paracoccidioides lutzii (strain ATCC MYA-826 / Pb01) OX=502779 GN=PAAG_03701 PE=4 SV=2
C1GP19	-1.38041	1e-05	338	0.000845519	0.000612514	40S ribosomal protein S8 OS=Paracoccidioides lutzii (strain ATCC MYA-826 / Pb01) OX=502779 GN=PAAG_00264 PE=3 SV=1
C1HDN1	-1.37548	0.000214308	2172	0.00264706	0.00192447	60S ribosomal protein L4-A OS=Paracoccidioides lutzii (strain ATCC MYA-826 / Pb01) OX=502779 GN=PAAG_08888 PE=4 SV=1
C1H5P2	-1.37408	0.00281256	62	0.000983775	0.000715949	Urease accessory protein ureG OS=Paracoccidioides lutzii (strain ATCC MYA-826 / Pb01) OX=502779 GN=PAAG_06237 PE=3 SV=1
C1H765	-1.3712	0.00267902	725	0.000803606	0.000586062	Cyanate hydratase OS=Paracoccidioides lutzii (strain ATCC MYA-826 / Pb01) OX=502779 GN=CYN1 PE=3 SV=1
C1H9E4	-1.36868	0.0013503	1005	0.000623945	0.000455874	60S ribosomal protein L23a OS=Paracoccidioides lutzii (strain ATCC MYA-826 / Pb01) OX=502779 GN=PAAG_07385 PE=3 SV=2
C1H1C7	-1.35699	0.000403542	85	0.000777726	0.000573125	Nascent polypeptide-associated complex subunit alpha OS=Paracoccidioides lutzii (strain ATCC MYA-826 / Pb01) OX=502779 GN=PAAG_04571 PE=4 SV=1
C1GPI5	-1.35301	0.00103848	988	0.000914872	0.000676176	60S ribosomal protein L2 OS=Paracoccidioides lutzii (strain ATCC MYA-826 / Pb01) OX=502779 GN=PAAG_00430 PE=4 SV=2
C1H4B8	-1.35021	0.00232559	2271	0.00103879	0.000769359	Deoxyuridine 5'-triphosphate nucleotidohydrolase OS=Paracoccidioides lutzii (strain ATCC MYA-826 / Pb01) OX=502779 GN=PAAG_05611 PE=4 SV=1
O60008	-1.35011	1e-05	1903	0.0059585	0.00441335	Heat shock protein 60, mitochondrial OS=Paracoccidioides lutzii (strain ATCC MYA-826 / Pb01) OX=502779 GN=HSP60 PE=1 SV=1
C1HB48	-1.35005	0.0033477	1930	0.0009295	0.000688495	Uncharacterized protein OS=Paracoccidioides lutzii (strain ATCC MYA-826 / Pb01) OX=502779 GN=PAAG_07989 PE=4 SV=1
C1HA43	-1.34759	0.000299278	1268	0.00192891	0.00143138	Uncharacterized protein OS=Paracoccidioides lutzii (strain ATCC MYA-826 / Pb01) OX=502779 GN=PAAG_07772 PE=4 SV=2
C1H754	-1.34062	0.00399867	321	0.00108242	0.0008074	3-demethylubiquinone-9 3-methyltransferase OS=Paracoccidioides lutzii (strain ATCC MYA-826 / Pb01) OX=502779 GN=PAAG_06595 PE=4 SV=1
C1GR21	-1.33674	0.00045426	1269	0.00172054	0.00128711	L-threonine 3-dehydrogenase OS=Paracoccidioides lutzii (strain ATCC MYA-826 / Pb01) OX=502779 GN=PAAG_00966 PE=3 SV=1
C1HBM2	-1.33367	0.000341921	528	0.00195608	0.00146669	Fumarylacetoacetase OS=Paracoccidioides lutzii (strain ATCC MYA-826 / Pb01) OX=502779 GN=PAAG_08163 PE=3 SV=1
C1H0I8	-1.32506	0.00125665	1011	0.000637727	0.000481283	UBX domain-containing protein OS=Paracoccidioides lutzii (strain ATCC MYA-826 / Pb01) OX=502779 GN=PAAG_04282 PE=4 SV=1
C1H4P4	-1.32471	0.00174632	2282	0.000430312	0.000324833	Calcium/calmodulin-dependent protein kinase OS=Paracoccidioides lutzii (strain ATCC MYA-826 / Pb01) OX=502779 GN=PAAG_05737 PE=3 SV=2
C1GYU3	-1.32036	0.00015877	1914	0.00166306	0.00125955	Proteasome endopeptidase complex OS=Paracoccidioides lutzii (strain ATCC MYA-826 / Pb01) OX=502779 GN=PAAG_03687 PE=3 SV=2
C1GQK6	-1.31994	0.00133951	1547	0.000859132	0.000650886	60S acidic ribosomal protein P0 OS=Paracoccidioides lutzii (strain ATCC MYA-826 / Pb01) OX=502779 GN=PAAG_00801 PE=3 SV=1
C1GXR7	-1.31486	0.00734767	102	0.000581642	0.000442361	CCR4-Not complex subunit Caf16 OS=Paracoccidioides lutzii (strain ATCC MYA-826 / Pb01) OX=502779 GN=PAAG_03640 PE=4 SV=1
C1HBN8	-1.31315	0.00397263	1302	0.000581224	0.000442619	Uncharacterized protein OS=Paracoccidioides lutzii (strain ATCC MYA-826 / Pb01) OX=502779 GN=PAAG_08179 PE=4 SV=1
C1GQ71	-1.31199	4.63141e-05	1569	0.000665638	0.00050735	Uncharacterized protein OS=Paracoccidioides lutzii (strain ATCC MYA-826 / Pb01) OX=502779 GN=PAAG_00666 PE=4 SV=2
C1H3Y8	-1.30964	0.00137728	314	0.00125967	0.00096184	2-isopropylmalate synthase OS=Paracoccidioides lutzii (strain ATCC MYA-826 / Pb01) OX=502779 GN=PAAG_05481 PE=3 SV=2
C1GQX8	-1.3033	0.000947593	526	0.00196397	0.00150692	Proliferating cell nuclear antigen OS=Paracoccidioides lutzii (strain ATCC MYA-826 / Pb01) OX=502779 GN=PAAG_00923 PE=3 SV=2
A0A0A2V3L8	-1.30156	0.000343396	2275	0.00238826	0.00183492	Uncharacterized protein OS=Paracoccidioides lutzii (strain ATCC MYA-826 / Pb01) OX=502779 GN=PAAG_12620 PE=3 SV=1
C1HC60	-1.29952	0.00532474	690	0.00185936	0.0014308	Isocitrate dehydrogenase [NADP] OS=Paracoccidioides lutzii (strain ATCC MYA-826 / Pb01) OX=502779 GN=PAAG_08351 PE=3 SV=2
C1H3S4	-1.29538	0.000588628	11	0.00249844	0.00192874	Mitochondrial-processing peptidase subunit beta OS=Paracoccidioides lutzii (strain ATCC MYA-826 / Pb01) OX=502779 GN=PAAG_05417 PE=3 SV=1
C1H509	-1.29442	0.00624462	1870	0.000553898	0.000427911	Uncharacterized protein OS=Paracoccidioides lutzii (strain ATCC MYA-826 / Pb01) OX=502779 GN=PAAG_05850 PE=3 SV=1
C1GQK2	-1.28679	0.00751882	1929	0.000970443	0.000754157	Mitochondrial protein import protein MAS5 OS=Paracoccidioides lutzii (strain ATCC MYA-826 / Pb01) OX=502779 GN=PAAG_00797 PE=3 SV=1
C1HA00	-1.28673	0.000499463	1284	0.00135633	0.00105409	Isocitrate dehydrogenase [NAD] subunit, mitochondrial OS=Paracoccidioides lutzii (strain ATCC MYA-826 / Pb01) OX=502779 GN=PAAG_07729 PE=3 SV=2
C1GWW0	-1.2793	0.00169162	1581	0.00309577	0.00241989	Peptidyl-prolyl cis-trans isomerase D OS=Paracoccidioides lutzii (strain ATCC MYA-826 / Pb01) OX=502779 GN=PAAG_03334 PE=4 SV=2
C1HBF9	-1.27642	0.00018438	527	0.00217543	0.00170433	O-acetylhomoserine (Thiol)-lyase OS=Paracoccidioides lutzii (strain ATCC MYA-826 / Pb01) OX=502779 GN=PAAG_08100 PE=3 SV=1
C1H454	-1.27503	0.000815384	974	0.0011764	0.000922639	Uncharacterized protein OS=Paracoccidioides lutzii (strain ATCC MYA-826 / Pb01) OX=502779 GN=PAAG_05547 PE=4 SV=1
C1H8Q9	-1.27442	0.0023371	39	0.00169293	0.0013284	UDP-galactopyranose mutase OS=Paracoccidioides lutzii (strain ATCC MYA-826 / Pb01) OX=502779 GN=PAAG_07150 PE=4 SV=2
C1HAH2	-1.2744	0.000250616	1578	0.00446784	0.00350582	Cobalamin-independent synthase OS=Paracoccidioides lutzii (strain ATCC MYA-826 / Pb01) OX=502779 GN=PAAG_07626 PE=3 SV=2
C1GYF2	-1.27183	0.00039582	1610	0.00102491	0.000805858	ThiJ/PfpI family protein OS=Paracoccidioides lutzii (strain ATCC MYA-826 / Pb01) OX=502779 GN=PAAG_03106 PE=4 SV=1
C1H9G9	-1.27179	0.00391595	954	0.00221842	0.00174433	2,3-bisphosphoglycerate-independent phosphoglycerate mutase OS=Paracoccidioides lutzii (strain ATCC MYA-826 / Pb01) OX=502779 GN=PAAG_07410 PE=3 SV=1
C1HBD4	-1.26971	0.000274976	16	0.00213379	0.00168054	Citrate synthase OS=Paracoccidioides lutzii (strain ATCC MYA-826 / Pb01) OX=502779 GN=PAAG_08075 PE=3 SV=1
C1HBK0	-1.26664	0.00310936	1280	0.00140267	0.00110739	Proteasome subunit alpha type OS=Paracoccidioides lutzii (strain ATCC MYA-826 / Pb01) OX=502779 GN=PAAG_08141 PE=3 SV=1
C1HB96	-1.26354	0.000220003	943	0.00506311	0.00400707	ATP synthase subunit beta OS=Paracoccidioides lutzii (strain ATCC MYA-826 / Pb01) OX=502779 GN=PAAG_08037 PE=3 SV=2
C1H072	-1.26261	0.00289793	310	0.00131694	0.00104303	Transaldolase OS=Paracoccidioides lutzii (strain ATCC MYA-826 / Pb01) OX=502779 GN=PAAG_04166 PE=4 SV=1
C1GTZ6	-1.25758	0.00811477	1942	0.00073531	0.000584704	Homoserine dehydrogenase OS=Paracoccidioides lutzii (strain ATCC MYA-826 / Pb01) OX=502779 GN=PAAG_01991 PE=3 SV=1
C1H1B5	-1.25688	0.00193445	1854	0.00320661	0.00255125	2-methylcitrate dehydratase OS=Paracoccidioides lutzii (strain ATCC MYA-826 / Pb01) OX=502779 GN=PAAG_04559 PE=4 SV=1
C1HA21	-1.25688	2.05727e-05	1577	0.00583525	0.00464266	Heat shock protein Hsp88 OS=Paracoccidioides lutzii (strain ATCC MYA-826 / Pb01) OX=502779 GN=PAAG_07750 PE=3 SV=1
C1GS52	-1.23959	0.00057625	965	0.00137157	0.00110648	Actin cytoskeleton protein (VIP1) OS=Paracoccidioides lutzii (strain ATCC MYA-826 / Pb01) OX=502779 GN=PAAG_01347 PE=4 SV=1
C1HC22	-1.2392	0.00679806	1584	0.00206581	0.00166704	L-PSP endoribonuclease family protein (Hmf1) OS=Paracoccidioides lutzii (strain ATCC MYA-826 / Pb01) OX=502779 GN=PAAG_08313 PE=4 SV=2
C1GQQ6	-1.23711	0.0068261	968	0.000984265	0.000795618	6,7-dimethyl-8-ribityllumazine synthase OS=Paracoccidioides lutzii (strain ATCC MYA-826 / Pb01) OX=502779 GN=PAAG_00851 PE=3 SV=1
C1H819	-1.2362	1.0597e-05	7	0.00300707	0.0024325	G-protein comlpex beta subunit CpcB OS=Paracoccidioides lutzii (strain ATCC MYA-826 / Pb01) OX=502779 GN=PAAG_06996 PE=4 SV=1
C1GY74	-1.23566	0.000857127	322	0.000998646	0.000808187	Elongation factor 1-beta OS=Paracoccidioides lutzii (strain ATCC MYA-826 / Pb01) OX=502779 GN=PAAG_03028 PE=3 SV=1
C1GWV9	-1.23117	0.00188458	1918	0.00174424	0.00141673	Formamidase OS=Paracoccidioides lutzii (strain ATCC MYA-826 / Pb01) OX=502779 GN=PAAG_03333 PE=4 SV=2
C1H4I6	-1.23053	1.42211e-05	519	0.00623711	0.00506864	Heat shock protein OS=Paracoccidioides lutzii (strain ATCC MYA-826 / Pb01) OX=502779 GN=PAAG_05679 PE=3 SV=2
C1H5M9	-1.23028	0.00101218	969	0.00113681	0.000924026	Carnitine O-acetyltransferase OS=Paracoccidioides lutzii (strain ATCC MYA-826 / Pb01) OX=502779 GN=PAAG_06224 PE=3 SV=2
C1H100	-1.23	0.00448251	2265	0.00429805	0.00349435	Transketolase OS=Paracoccidioides lutzii (strain ATCC MYA-826 / Pb01) OX=502779 GN=PAAG_04444 PE=3 SV=1
C1GXG3	-1.22678	0.00653089	1956	0.000623876	0.000508546	Uncharacterized protein OS=Paracoccidioides lutzii (strain ATCC MYA-826 / Pb01) OX=502779 GN=PAAG_03537 PE=4 SV=1
Q8X1X3	-1.21204	1e-05	682	0.00716091	0.00590814	Glyceraldehyde-3-phosphate dehydrogenase OS=Paracoccidioides lutzii (strain ATCC MYA-826 / Pb01) OX=502779 GN=GPD PE=1 SV=1
C1H921	-1.2111	0.00576095	771	0.000582617	0.000481066	Oxidoreductase OS=Paracoccidioides lutzii (strain ATCC MYA-826 / Pb01) OX=502779 GN=PAAG_07262 PE=4 SV=2
C1GU55	-1.20595	1e-05	1273	0.00177343	0.00147057	Pyruvate decarboxylase OS=Paracoccidioides lutzii (strain ATCC MYA-826 / Pb01) OX=502779 GN=PAAG_02050 PE=3 SV=1
C1H1R5	-1.2028	0.0023491	1907	0.00267842	0.00222682	Osmotic growth protein OS=Paracoccidioides lutzii (strain ATCC MYA-826 / Pb01) OX=502779 GN=PAAG_04851 PE=4 SV=1
C1HCF8	-1.19538	3.14339e-05	2266	0.00253568	0.00212123	Malate dehydrogenase OS=Paracoccidioides lutzii (strain ATCC MYA-826 / Pb01) OX=502779 GN=PAAG_08449 PE=3 SV=2
C1H7L0	-1.19463	0.00109356	1904	0.0038528	0.00322511	DNA damage checkpoint protein rad24 OS=Paracoccidioides lutzii (strain ATCC MYA-826 / Pb01) OX=502779 GN=PAAG_06751 PE=3 SV=1
A0A0A2V2G8	-1.18912	0.000301063	521	0.0049385	0.00415307	Enolase OS=Paracoccidioides lutzii (strain ATCC MYA-826 / Pb01) OX=502779 GN=PAAG_11169 PE=3 SV=1
C1GQQ7	-1.18509	0.00258691	1924	0.00109588	0.000924725	Proteasome endopeptidase complex OS=Paracoccidioides lutzii (strain ATCC MYA-826 / Pb01) OX=502779 GN=PAAG_00852 PE=3 SV=2
A0A0A2VLY3	-1.17761	0.000305508	3	0.00451825	0.00383681	Hsp7-like protein OS=Paracoccidioides lutzii (strain ATCC MYA-826 / Pb01) OX=502779 GN=PAAG_11262 PE=3 SV=1
C1H1A5	1.15471	0.000328559	535	0.00126172	0.00145691	Isocitrate lyase OS=Paracoccidioides lutzii (strain ATCC MYA-826 / Pb01) OX=502779 GN=PAAG_04549 PE=3 SV=2
C1H1F8	1.19652	0.00257169	1603	0.0012621	0.00151013	Mannosyl-oligosaccharide glucosidase OS=Paracoccidioides lutzii (strain ATCC MYA-826 / Pb01) OX=502779 GN=PAAG_04602 PE=4 SV=2
C1H6F3	1.22829	0.00341903	2293	0.00181701	0.0022318	Rab GDP dissociation inhibitor OS=Paracoccidioides lutzii (strain ATCC MYA-826 / Pb01) OX=502779 GN=PAAG_06344 PE=3 SV=1
C1H2G4	1.23377	0.00409414	930	0.00128822	0.00158936	Uncharacterized protein OS=Paracoccidioides lutzii (strain ATCC MYA-826 / Pb01) OX=502779 GN=PAAG_04793 PE=4 SV=1
C1GY77	1.23827	0.00412126	1597	0.00157555	0.00195095	Tubulin beta chain OS=Paracoccidioides lutzii (strain ATCC MYA-826 / Pb01) OX=502779 GN=PAAG_03031 PE=3 SV=2
C1GVV8	1.24051	0.00323753	2283	0.0012895	0.00159964	Acetyl-coenzyme A synthetase OS=Paracoccidioides lutzii (strain ATCC MYA-826 / Pb01) OX=502779 GN=PAAG_02653 PE=3 SV=1
C1H4J7	1.24204	5.76992e-05	939	0.000984348	0.0012226	S-formylglutathione hydrolase OS=Paracoccidioides lutzii (strain ATCC MYA-826 / Pb01) OX=502779 GN=PAAG_05690 PE=3 SV=1
C1GQ38	1.25171	0.00200654	693	0.000997711	0.00124884	Glucose-6-phosphate 1-dehydrogenase OS=Paracoccidioides lutzii (strain ATCC MYA-826 / Pb01) OX=502779 GN=PAAG_00633 PE=3 SV=2
C1GP48	1.25198	0.000948206	787	0.000332408	0.000416167	Quinone oxidoreductase OS=Paracoccidioides lutzii (strain ATCC MYA-826 / Pb01) OX=502779 GN=PAAG_00293 PE=4 SV=2
C1GPF8	1.25549	0.000231617	1288	0.00102547	0.00128747	Alcohol dehydrogenase OS=Paracoccidioides lutzii (strain ATCC MYA-826 / Pb01) OX=502779 GN=PAAG_00403 PE=3 SV=1
C1GNB9	1.2571	0.00654394	996	0.000693129	0.00087133	Dihydroxy-acid dehydratase OS=Paracoccidioides lutzii (strain ATCC MYA-826 / Pb01) OX=502779 GN=PAAG_00014 PE=3 SV=1
A0A0A2V2M6	1.25731	0.00299712	1880	0.000485352	0.000610237	Uncharacterized protein OS=Paracoccidioides lutzii (strain ATCC MYA-826 / Pb01) OX=502779 GN=PAAG_11560 PE=4 SV=1
C1GS07	1.26723	0.00446121	324	0.000719231	0.00091143	S-methyl-5'-thioadenosine phosphorylase OS=Paracoccidioides lutzii (strain ATCC MYA-826 / Pb01) OX=502779 GN=PAAG_01302 PE=3 SV=2
C1H2X4	1.27149	0.00614488	43	0.000776919	0.000987844	Aspartyl-tRNA synthetase OS=Paracoccidioides lutzii (strain ATCC MYA-826 / Pb01) OX=502779 GN=PAAG_05117 PE=4 SV=2
C1H8Z3	1.2715	0.00212938	972	0.000788096	0.00100207	NAP family protein OS=Paracoccidioides lutzii (strain ATCC MYA-826 / Pb01) OX=502779 GN=PAAG_07234 PE=3 SV=1
C1GSI6	1.28037	0.00104084	1613	0.000954069	0.00122156	FGGY-family carbohydrate kinase OS=Paracoccidioides lutzii (strain ATCC MYA-826 / Pb01) OX=502779 GN=PAAG_01481 PE=4 SV=1
C1HBP3	1.29055	0.000688416	538	0.00106792	0.0013782	T-complex protein 1 epsilon subunit OS=Paracoccidioides lutzii (strain ATCC MYA-826 / Pb01) OX=502779 GN=PAAG_08184 PE=3 SV=1
C1GYW6	1.29692	0.0055189	763	0.00033167	0.00043015	Small nuclear ribonucleoprotein E OS=Paracoccidioides lutzii (strain ATCC MYA-826 / Pb01) OX=502779 GN=PAAG_03710 PE=3 SV=2
C1GVW9	1.30009	0.00316687	967	0.000860122	0.00111824	3-ketoacyl-CoA thiolase OS=Paracoccidioides lutzii (strain ATCC MYA-826 / Pb01) OX=502779 GN=PAAG_02664 PE=3 SV=1
C1GNS8	1.30375	0.00463484	1571	0.000776654	0.00101256	Electron transfer flavoprotein subunit alpha OS=Paracoccidioides lutzii (strain ATCC MYA-826 / Pb01) OX=502779 GN=PAAG_00173 PE=4 SV=1
C1GWC5	1.30547	0.00080994	2306	0.00081616	0.00106548	Obg-like ATPase 1 OS=Paracoccidioides lutzii (strain ATCC MYA-826 / Pb01) OX=502779 GN=PAAG_02820 PE=3 SV=2
C1H2Q5	1.30657	2.52742e-05	1911	0.00269791	0.003525	Aconitate hydratase, mitochondrial OS=Paracoccidioides lutzii (strain ATCC MYA-826 / Pb01) OX=502779 GN=PAAG_05048 PE=3 SV=2
C1GZ32	1.31081	0.00538754	100	0.000317888	0.00041669	Inositol-3-phosphate synthase OS=Paracoccidioides lutzii (strain ATCC MYA-826 / Pb01) OX=502779 GN=PAAG_03776 PE=4 SV=1
C1GWM6	1.31976	0.000777005	1298	0.000887029	0.00117067	Elongation factor Tu OS=Paracoccidioides lutzii (strain ATCC MYA-826 / Pb01) OX=502779 GN=PAAG_02921 PE=3 SV=1
C1H9R8	1.32219	0.00171106	750	0.000403292	0.000533227	Peptidyl-prolyl cis-trans isomerase OS=Paracoccidioides lutzii (strain ATCC MYA-826 / Pb01) OX=502779 GN=PAAG_07509 PE=4 SV=1
C1H815	1.32449	0.00654649	709	0.000708626	0.000938566	Adenine phosphoribosyltransferase OS=Paracoccidioides lutzii (strain ATCC MYA-826 / Pb01) OX=502779 GN=PAAG_06906 PE=3 SV=1
C1GST8	1.32457	0.00331355	518	0.00153729	0.00203625	ATP-dependent 6-phosphofructokinase OS=Paracoccidioides lutzii (strain ATCC MYA-826 / Pb01) OX=502779 GN=PAAG_01583 PE=3 SV=1
C1H079	1.32821	0.00502255	512	0.000831126	0.00110391	Serine/threonine-protein phosphatase OS=Paracoccidioides lutzii (strain ATCC MYA-826 / Pb01) OX=502779 GN=PAAG_04173 PE=3 SV=2; Additional IDs concatenated into MaxParsimony group: C1GUQ3
C1GYU5	1.32872	0.000279575	975	0.000637489	0.000847042	3-ketoacyl-CoA thiolase B OS=Paracoccidioides lutzii (strain ATCC MYA-826 / Pb01) OX=502779 GN=PAAG_03689 PE=3 SV=1
C1GU76	1.33594	0.00118111	1251	0.00119089	0.00159095	Glutamyl-tRNA synthetase OS=Paracoccidioides lutzii (strain ATCC MYA-826 / Pb01) OX=502779 GN=PAAG_02071 PE=3 SV=1
A0A0A2UZ40	1.33797	0.00544216	977	0.000679532	0.000909194	Tubulin alpha chain OS=Paracoccidioides lutzii (strain ATCC MYA-826 / Pb01) OX=502779 GN=PAAG_12506 PE=3 SV=1
C1HCB4	1.34206	0.00141215	1366	0.000290813	0.00039029	Cystathionine beta-lyase OS=Paracoccidioides lutzii (strain ATCC MYA-826 / Pb01) OX=502779 GN=PAAG_08405 PE=3 SV=1
C1HCP4	1.36217	0.00122882	1869	0.000581224	0.000791726	Uncharacterized protein OS=Paracoccidioides lutzii (strain ATCC MYA-826 / Pb01) OX=502779 GN=PAAG_08535 PE=3 SV=2
C1H264	1.37875	8.5193e-05	764	0.000443118	0.000610951	ATP-dependent (S)-NAD(P)H-hydrate dehydratase OS=Paracoccidioides lutzii (strain ATCC MYA-826 / Pb01) OX=502779 GN=PAAG_04693 PE=3 SV=2
C1GVZ8	1.38904	0.000203448	948	0.0013843	0.00192284	Saccharopine dehydrogenase OS=Paracoccidioides lutzii (strain ATCC MYA-826 / Pb01) OX=502779 GN=PAAG_02693 PE=4 SV=1
C1HD77	1.3978	3.05566e-05	938	0.000846242	0.00118288	Succinate-semialdehyde dehydrogenase OS=Paracoccidioides lutzii (strain ATCC MYA-826 / Pb01) OX=502779 GN=PAAG_08718 PE=3 SV=1
C1H510	1.3978	0.000291273	2322	0.000595576	0.000832499	Cysteine desulfurase OS=Paracoccidioides lutzii (strain ATCC MYA-826 / Pb01) OX=502779 GN=PAAG_05851 PE=3 SV=1
C1H2M2	1.41075	0.00582026	1955	0.000775709	0.00109433	Leucyl-tRNA synthetase OS=Paracoccidioides lutzii (strain ATCC MYA-826 / Pb01) OX=502779 GN=PAAG_05015 PE=4 SV=2
C1GTI8	1.4141	0.000623912	1259	0.00087219	0.00123336	2-succinylbenzoate-CoA ligase OS=Paracoccidioides lutzii (strain ATCC MYA-826 / Pb01) OX=502779 GN=PAAG_01833 PE=4 SV=1
C1HDP8	1.42322	2.42685e-05	1592	0.00142612	0.00202968	Peroxisomal multifunctional enzyme OS=Paracoccidioides lutzii (strain ATCC MYA-826 / Pb01) OX=502779 GN=PAAG_08859 PE=4 SV=1
C1GTE1	1.43304	0.000277038	50	0.000608383	0.000871838	Phenylalanyl-tRNA synthetase beta chain OS=Paracoccidioides lutzii (strain ATCC MYA-826 / Pb01) OX=502779 GN=PAAG_01786 PE=4 SV=1
C1GSS4	1.43402	0.00386162	82	0.000472491	0.000677563	Guanine deaminase OS=Paracoccidioides lutzii (strain ATCC MYA-826 / Pb01) OX=502779 GN=PAAG_01569 PE=4 SV=2
C1GR57	1.43721	2.2992e-05	677	0.00151093	0.00217153	NAD-specific glutamate dehydrogenase OS=Paracoccidioides lutzii (strain ATCC MYA-826 / Pb01) OX=502779 GN=PAAG_01002 PE=3 SV=2
C1H005	1.43914	0.00335768	87	0.000416197	0.000598963	Methylcrotonoyl-CoA carboxylase subunit alpha OS=Paracoccidioides lutzii (strain ATCC MYA-826 / Pb01) OX=502779 GN=PAAG_04099 PE=4 SV=2
A0A0A2V1Z9	1.44157	0.00181291	701	0.00085891	0.00123818	Acetolactate synthase OS=Paracoccidioides lutzii (strain ATCC MYA-826 / Pb01) OX=502779 GN=PAAG_11383 PE=3 SV=1
C1GSH0	1.44282	0.00206557	308	0.000639258	0.000922336	Carbonic anhydrase OS=Paracoccidioides lutzii (strain ATCC MYA-826 / Pb01) OX=502779 GN=PAAG_01465 PE=3 SV=2
C1GP40	1.44639	0.00179717	1887	0.000361043	0.000522209	Imidazole glycerol phosphate synthase hisHF OS=Paracoccidioides lutzii (strain ATCC MYA-826 / Pb01) OX=502779 GN=PAAG_00285 PE=3 SV=1
C1HDJ2	1.45907	0.00527043	70	0.000579079	0.000844915	ATP-dependent RNA helicase DHH1 OS=Paracoccidioides lutzii (strain ATCC MYA-826 / Pb01) OX=502779 GN=PAAG_08833 PE=3 SV=1
C1HD60	1.46423	0.0012528	729	0.000471084	0.000689777	D-3-phosphoglycerate dehydrogenase OS=Paracoccidioides lutzii (strain ATCC MYA-826 / Pb01) OX=502779 GN=PAAG_08701 PE=3 SV=1
C1H8L1	1.46627	0.000516408	6	0.00189747	0.0027822	Pentafunctional AROM polypeptide OS=Paracoccidioides lutzii (strain ATCC MYA-826 / Pb01) OX=502779 GN=PAAG_07102 PE=3 SV=2
C1H1B1	1.47052	0.000274895	315	0.000610247	0.000897383	Sarcosine oxidase OS=Paracoccidioides lutzii (strain ATCC MYA-826 / Pb01) OX=502779 GN=PAAG_04555 PE=4 SV=2
C1HDU3	1.47318	0.00127115	1030	0.000290813	0.000428419	SH3 domain-containing protein OS=Paracoccidioides lutzii (strain ATCC MYA-826 / Pb01) OX=502779 GN=PAAG_08936 PE=4 SV=2
C1GVQ8	1.47629	0.00171419	29	0.000927763	0.00136965	Aspartate aminotransferase OS=Paracoccidioides lutzii (strain ATCC MYA-826 / Pb01) OX=502779 GN=PAAG_02603 PE=4 SV=2
A0A0A2V4R1	1.48213	0.00182868	2182	0.000386587	0.000572972	Cytochrome c1, heme protein, mitochondrial OS=Paracoccidioides lutzii (strain ATCC MYA-826 / Pb01) OX=502779 GN=PAAG_12153 PE=4 SV=1
C1H197	1.49853	8.69164e-05	694	0.000954753	0.00143072	Alcohol dehydrogenase OS=Paracoccidioides lutzii (strain ATCC MYA-826 / Pb01) OX=502779 GN=PAAG_04541 PE=3 SV=1
C1GTX9	1.51518	0.000190604	747	0.000360806	0.000546687	Mitochondrial methylglutaconyl-CoA hydratase OS=Paracoccidioides lutzii (strain ATCC MYA-826 / Pb01) OX=502779 GN=PAAG_01974 PE=4 SV=1
C1H6A0	1.51782	0.00425321	712	0.000888476	0.00134854	Uncharacterized protein OS=Paracoccidioides lutzii (strain ATCC MYA-826 / Pb01) OX=502779 GN=PAAG_06210 PE=4 SV=2
C1H5M0	1.51851	0.00300812	1004	0.000428736	0.000651039	Hydroxymethylglutaryl-CoA lyase OS=Paracoccidioides lutzii (strain ATCC MYA-826 / Pb01) OX=502779 GN=PAAG_06215 PE=4 SV=1
A0A0A2V572	1.52594	0.00637941	1338	0.000637336	0.000972534	Uncharacterized protein OS=Paracoccidioides lutzii (strain ATCC MYA-826 / Pb01) OX=502779 GN=PAAG_11966 PE=4 SV=1
C1GNQ9	1.53765	0.0024534	92	0.000388103	0.000596765	Serine/threonine-protein kinase RIO1 OS=Paracoccidioides lutzii (strain ATCC MYA-826 / Pb01) OX=502779 GN=PAAG_00154 PE=3 SV=1
C1H6E3	1.56591	0.000296027	780	0.000373835	0.000585391	Pre-mRNA-splicing factor OS=Paracoccidioides lutzii (strain ATCC MYA-826 / Pb01) OX=502779 GN=PAAG_06334 PE=3 SV=2
C1HCM6	1.5821	0.000778389	738	0.000486159	0.000769154	Propionate-CoA ligase OS=Paracoccidioides lutzii (strain ATCC MYA-826 / Pb01) OX=502779 GN=PAAG_08517 PE=4 SV=1
C1HBN3	1.58397	0.000299634	966	0.000690846	0.00109428	Mannose-1-phosphate guanyltransferase subunit beta-A OS=Paracoccidioides lutzii (strain ATCC MYA-826 / Pb01) OX=502779 GN=PAAG_08174 PE=4 SV=2
C1GYI1	1.5914	0.00107647	367	0.000319686	0.000508749	E3 ubiquitin-protein ligase OS=Paracoccidioides lutzii (strain ATCC MYA-826 / Pb01) OX=502779 GN=PAAG_03135 PE=4 SV=1
C1H458	1.60292	0.00761643	1885	0.000332463	0.000532912	Cullin-associated NEDD8-dissociated protein OS=Paracoccidioides lutzii (strain ATCC MYA-826 / Pb01) OX=502779 GN=PAAG_05551 PE=4 SV=2
C1GTZ1	1.60696	0.00342889	2188	0.00023438	0.000376639	Nucleosome binding protein OS=Paracoccidioides lutzii (strain ATCC MYA-826 / Pb01) OX=502779 GN=PAAG_01986 PE=4 SV=1
C1H4I7	1.61188	0.00330068	1877	0.000606921	0.000978285	Uncharacterized protein OS=Paracoccidioides lutzii (strain ATCC MYA-826 / Pb01) OX=502779 GN=PAAG_05680 PE=4 SV=2
C1GT66	1.62738	2.94976e-05	731	0.000511565	0.000832513	tRNA (guanine(37)-N1)-methyltransferase OS=Paracoccidioides lutzii (strain ATCC MYA-826 / Pb01) OX=502779 GN=TRM5 PE=3 SV=2
C1H6E2	1.64832	0.00189811	1701	0.00027596	0.000454871	Uncharacterized protein OS=Paracoccidioides lutzii (strain ATCC MYA-826 / Pb01) OX=502779 GN=PAAG_06333 PE=4 SV=2
C1H3Q4	1.65135	0.00361604	722	0.000566704	0.000935827	DNA-directed RNA polymerase subunit OS=Paracoccidioides lutzii (strain ATCC MYA-826 / Pb01) OX=502779 GN=PAAG_05397 PE=3 SV=2
C1HDR7	1.67266	0.00172093	2027	0.000248495	0.000415647	D-3-phosphoglycerate dehydrogenase OS=Paracoccidioides lutzii (strain ATCC MYA-826 / Pb01) OX=502779 GN=PAAG_08910 PE=3 SV=2
C1H3Y1	1.67663	0.000346134	101	0.000248718	0.000417007	D-arabinono-1,4-lactone oxidase OS=Paracoccidioides lutzii (strain ATCC MYA-826 / Pb01) OX=502779 GN=PAAG_05474 PE=4 SV=1
C1GRS7	1.75243	0.00224481	91	0.00030359	0.00053202	Acyl-CoA dehydrogenase family protein OS=Paracoccidioides lutzii (strain ATCC MYA-826 / Pb01) OX=502779 GN=PAAG_01222 PE=4 SV=2
C1HD00	1.75387	0.000375047	48	0.000428668	0.000751828	Galactonate dehydratase OS=Paracoccidioides lutzii (strain ATCC MYA-826 / Pb01) OX=502779 GN=PAAG_08641 PE=4 SV=1
C1GVQ9	1.76228	0.00621749	1660	0.000249957	0.000440495	L-tyrosine decarboxylase OS=Paracoccidioides lutzii (strain ATCC MYA-826 / Pb01) OX=502779 GN=PAAG_02604 PE=3 SV=2
C1HC79	1.77	0.00108129	1010	0.000388619	0.000687856	Uncharacterized protein OS=Paracoccidioides lutzii (strain ATCC MYA-826 / Pb01) OX=502779 GN=PAAG_08370 PE=4 SV=2
C1GUG8	1.77312	3.71458e-05	1596	0.00155238	0.00275256	Acetyl-/propionyl-coenzyme A carboxylase alpha chain OS=Paracoccidioides lutzii (strain ATCC MYA-826 / Pb01) OX=502779 GN=PAAG_02163 PE=4 SV=2
C1H733	1.77829	0.0002788	1316	0.000373543	0.000664267	Curved DNA-binding protein 42 kDa protein OS=Paracoccidioides lutzii (strain ATCC MYA-826 / Pb01) OX=502779 GN=PAAG_06574 PE=4 SV=1
C1GRQ6	1.78358	1.07068e-05	743	0.000416099	0.000742144	WD repeat-containing protein OS=Paracoccidioides lutzii (strain ATCC MYA-826 / Pb01) OX=502779 GN=PAAG_01201 PE=4 SV=2
C1H4K8	1.78424	0.00218402	76	0.000306043	0.000546055	Uncharacterized protein OS=Paracoccidioides lutzii (strain ATCC MYA-826 / Pb01) OX=502779 GN=PAAG_05701 PE=4 SV=1
C1H0K0	1.81099	0.00296034	1691	0.000222853	0.000403585	Methylenetetrahydrofolate reductase OS=Paracoccidioides lutzii (strain ATCC MYA-826 / Pb01) OX=502779 GN=PAAG_04294 PE=3 SV=1
C1GV79	1.81629	0.00470585	1057	0.000207134	0.000376217	Uncharacterized protein OS=Paracoccidioides lutzii (strain ATCC MYA-826 / Pb01) OX=502779 GN=PAAG_02552 PE=4 SV=1
C1GP42	1.82409	0.00680228	2245	0.000206286	0.000376284	Ubiquitin-like modifier-activating enzyme ATG7 OS=Paracoccidioides lutzii (strain ATCC MYA-826 / Pb01) OX=502779 GN=PAAG_00287 PE=3 SV=2
C1GYA0	1.83134	0.00346016	1995	0.000276864	0.000507033	Uncharacterized protein OS=Paracoccidioides lutzii (strain ATCC MYA-826 / Pb01) OX=502779 GN=PAAG_03054 PE=4 SV=2
C1GTK4	1.8322	0.000205666	1327	0.000291204	0.000533545	Uncharacterized protein OS=Paracoccidioides lutzii (strain ATCC MYA-826 / Pb01) OX=502779 GN=PAAG_01849 PE=4 SV=1
C1GP65	1.86855	0.00417015	801	0.000229457	0.000428751	Glycerol-3-phosphate dehydrogenase OS=Paracoccidioides lutzii (strain ATCC MYA-826 / Pb01) OX=502779 GN=PAAG_00310 PE=3 SV=1
C1GXH7	1.88424	0.00166324	1987	0.000304512	0.000573774	Calcineurin subunit B OS=Paracoccidioides lutzii (strain ATCC MYA-826 / Pb01) OX=502779 GN=PAAG_03551 PE=4 SV=1
C1H2P4	1.8948	0.00443624	145	0.00023438	0.000444103	HHE domain-containing protein OS=Paracoccidioides lutzii (strain ATCC MYA-826 / Pb01) OX=502779 GN=PAAG_05037 PE=4 SV=1
C1H2Y6	1.91318	3.18706e-05	47	0.000441795	0.000845236	Serine/threonine-protein phosphatase OS=Paracoccidioides lutzii (strain ATCC MYA-826 / Pb01) OX=502779 GN=PAAG_05129 PE=3 SV=2
C1GZT4	1.91559	0.00223644	382	0.000236872	0.00045375	Ubiquitin interaction motif protein OS=Paracoccidioides lutzii (strain ATCC MYA-826 / Pb01) OX=502779 GN=PAAG_04028 PE=4 SV=1
C1H381	1.91872	0.00124729	2268	0.000442548	0.000849125	Uncharacterized protein OS=Paracoccidioides lutzii (strain ATCC MYA-826 / Pb01) OX=502779 GN=PAAG_05224 PE=4 SV=2
C1H539	1.92708	0.000317297	1683	0.000276544	0.000532924	Phosphoribosylaminoimidazole-succinocarboxamide synthase OS=Paracoccidioides lutzii (strain ATCC MYA-826 / Pb01) OX=502779 GN=PAAG_05880 PE=3 SV=1
C1GU73	1.98813	0.000613608	1682	0.000249288	0.000495618	Uncharacterized protein OS=Paracoccidioides lutzii (strain ATCC MYA-826 / Pb01) OX=502779 GN=PAAG_02068 PE=4 SV=2
C1H4M7	2.00012	8.6914e-05	772	0.000208669	0.000417363	Uncharacterized protein OS=Paracoccidioides lutzii (strain ATCC MYA-826 / Pb01) OX=502779 GN=PAAG_05720 PE=4 SV=1
C1GUR1	2.00154	0.00689474	362	0.000206622	0.000413561	Kinase OS=Paracoccidioides lutzii (strain ATCC MYA-826 / Pb01) OX=502779 GN=PAAG_02384 PE=3 SV=2
C1HAS1	2.06528	0.00148828	2337	0.00037218	0.000768657	Phosphatidylinositol-phosphatidylcholine transfer protein OS=Paracoccidioides lutzii (strain ATCC MYA-826 / Pb01) OX=502779 GN=PAAG_07900 PE=4 SV=1
C1H538	2.0893	0.00121309	389	0.000193647	0.000404588	Complex I intermediate-associated protein OS=Paracoccidioides lutzii (strain ATCC MYA-826 / Pb01) OX=502779 GN=PAAG_05879 PE=4 SV=1
C1HB76	2.11886	0.00133486	1714	0.000208084	0.0004409	NADP:D-xylose dehydrogenase OS=Paracoccidioides lutzii (strain ATCC MYA-826 / Pb01) OX=502779 GN=PAAG_08017 PE=4 SV=1
C1H637	2.12057	0.00211942	2052	0.000220934	0.000468508	Dihydroorotase OS=Paracoccidioides lutzii (strain ATCC MYA-826 / Pb01) OX=502779 GN=PAAG_06147 PE=3 SV=2
C1GUG7	2.1455	1e-05	2202	0.000248871	0.000533953	Uncharacterized protein OS=Paracoccidioides lutzii (strain ATCC MYA-826 / Pb01) OX=502779 GN=PAAG_02162 PE=4 SV=2
C1GU09	2.14606	0.000303205	1347	0.000387464	0.000831521	Uncharacterized protein OS=Paracoccidioides lutzii (strain ATCC MYA-826 / Pb01) OX=502779 GN=PAAG_02004 PE=4 SV=1
C1HAE7	2.1524	0.00139733	1390	0.00022245	0.000478801	Ornithine carbamoyltransferase OS=Paracoccidioides lutzii (strain ATCC MYA-826 / Pb01) OX=502779 GN=PAAG_07601 PE=3 SV=2
C1HAB2	2.18248	0.00138754	991	0.000249456	0.000544434	Methionine aminopeptidase 2 OS=Paracoccidioides lutzii (strain ATCC MYA-826 / Pb01) OX=502779 GN=PAAG_07566 PE=3 SV=1
C1H1N5	2.18324	0.000374356	711	0.000375632	0.000820093	Methylenetetrahydrofolate dehydrogenase OS=Paracoccidioides lutzii (strain ATCC MYA-826 / Pb01) OX=502779 GN=PAAG_04821 PE=4 SV=2
C1GNV7	2.22742	0.00239333	1401	0.000262832	0.000585438	Ubiquitin carboxyl-terminal hydrolase OS=Paracoccidioides lutzii (strain ATCC MYA-826 / Pb01) OX=502779 GN=PAAG_00202 PE=3 SV=2
C1H9Q7	2.23949	0.000252967	1413	0.000226645	0.000507567	5-oxoprolinase OS=Paracoccidioides lutzii (strain ATCC MYA-826 / Pb01) OX=502779 GN=PAAG_07498 PE=4 SV=2
C1H4S9	2.28843	0.000129301	1685	0.000250012	0.000572134	Succinate-semialdehyde dehydrogenase OS=Paracoccidioides lutzii (strain ATCC MYA-826 / Pb01) OX=502779 GN=PAAG_05769 PE=4 SV=2
C1GTT3	2.28859	0.00326092	1050	0.000164706	0.000376945	Peroxisomal dehydratase OS=Paracoccidioides lutzii (strain ATCC MYA-826 / Pb01) OX=502779 GN=PAAG_01928 PE=4 SV=1
C1HB16	2.28948	3.78387e-05	986	0.000318069	0.000728213	Uncharacterized protein OS=Paracoccidioides lutzii (strain ATCC MYA-826 / Pb01) OX=502779 GN=PAAG_07957 PE=4 SV=1
C1H5U4	2.34209	2.61694e-05	1661	0.000332909	0.000779705	Tryptophan synthase OS=Paracoccidioides lutzii (strain ATCC MYA-826 / Pb01) OX=502779 GN=PAAG_06289 PE=3 SV=1
C1GSS1	2.34292	0.00443569	1725	0.000293196	0.000686935	Hydantoinase OS=Paracoccidioides lutzii (strain ATCC MYA-826 / Pb01) OX=502779 GN=PAAG_01566 PE=4 SV=2
A0A0A2V3X1	2.39508	1e-05	933	0.000693283	0.00166047	Uncharacterized protein OS=Paracoccidioides lutzii (strain ATCC MYA-826 / Pb01) OX=502779 GN=PAAG_12483 PE=4 SV=1
C1H1V2	2.40309	4.3094e-05	788	0.000221628	0.000532592	4-coumarate-CoA ligase OS=Paracoccidioides lutzii (strain ATCC MYA-826 / Pb01) OX=502779 GN=PAAG_04888 PE=4 SV=1
C1H1Y3	2.41564	0.000127406	1421	0.000236551	0.000571423	Uncharacterized protein OS=Paracoccidioides lutzii (strain ATCC MYA-826 / Pb01) OX=502779 GN=PAAG_04919 PE=4 SV=2
A0A0A2V4V2	2.44114	0.000348536	2019	0.000223119	0.000544665	Uncharacterized protein OS=Paracoccidioides lutzii (strain ATCC MYA-826 / Pb01) OX=502779 GN=PAAG_11860 PE=3 SV=1
C1HD41	2.48754	0.000443388	343	0.000193677	0.000481779	WD repeat-containing protein OS=Paracoccidioides lutzii (strain ATCC MYA-826 / Pb01) OX=502779 GN=PAAG_08682 PE=4 SV=2
A0A0A2V2U9	2.50352	1e-05	1991	0.000332338	0.000832016	Uncharacterized protein OS=Paracoccidioides lutzii (strain ATCC MYA-826 / Pb01) OX=502779 GN=PAAG_11385 PE=4 SV=1
C1HCD3	2.53802	0.000151319	2189	0.000179478	0.000455518	DNA-binding protein HEXBP OS=Paracoccidioides lutzii (strain ATCC MYA-826 / Pb01) OX=502779 GN=PAAG_08424 PE=4 SV=1
C1H256	2.56318	0.00100188	1417	0.000332825	0.000853089	Carbamoyl-phosphate synthase arginine-specific large chain OS=Paracoccidioides lutzii (strain ATCC MYA-826 / Pb01) OX=502779 GN=PAAG_04686 PE=4 SV=1
C1GT53	2.68039	0.000289004	741	0.000233795	0.000626661	Eukaryotic translation initiation factor 3 subunit D OS=Paracoccidioides lutzii (strain ATCC MYA-826 / Pb01) OX=502779 GN=PAAG_01698 PE=3 SV=1
C1GTD9	2.69308	2.31121e-05	1994	0.000332491	0.000895426	Phosphatase OS=Paracoccidioides lutzii (strain ATCC MYA-826 / Pb01) OX=502779 GN=PAAG_01784 PE=4 SV=1
C1GWE2	2.71415	0.000106341	793	0.000138829	0.000376804	Eukaryotic translation initiation factor 3 subunit H OS=Paracoccidioides lutzii (strain ATCC MYA-826 / Pb01) OX=502779 GN=PAAG_02837 PE=3 SV=2
C1HBU3	2.73824	1.50048e-05	2021	0.000180034	0.000492974	Uncharacterized protein OS=Paracoccidioides lutzii (strain ATCC MYA-826 / Pb01) OX=502779 GN=PAAG_08234 PE=4 SV=2; Additional IDs concatenated into MaxParsimony group: C1GV52
C1GQA9	2.86193	1.79454e-05	995	0.000236649	0.000677274	Methyltransferase OS=Paracoccidioides lutzii (strain ATCC MYA-826 / Pb01) OX=502779 GN=PAAG_00704 PE=4 SV=2
C1GR46	3.30746	0.000833041	2038	0.000165919	0.00054877	Heterogeneous nuclear ribonucleoprotein A1 OS=Paracoccidioides lutzii (strain ATCC MYA-826 / Pb01) OX=502779 GN=PAAG_00991 PE=4 SV=2
C1GYI2	3.85731	1.87466e-05	2015	0.000138746	0.000535186	Uncharacterized protein OS=Paracoccidioides lutzii (strain ATCC MYA-826 / Pb01) OX=502779 GN=PAAG_03136 PE=4 SV=2
C1GRT7	4.47197	0.00258414	1029	9.64275e-05	0.000431221	Uncharacterized protein OS=Paracoccidioides lutzii (strain ATCC MYA-826 / Pb01) OX=502779 GN=PAAG_01232 PE=4 SV=1
C1H782	4.50693	1e-05	549	0.000278161	0.00125365	Translation initiation factor 4B OS=Paracoccidioides lutzii (strain ATCC MYA-826 / Pb01) OX=502779 GN=PAAG_06623 PE=4 SV=2

## Sheet: Green
Protein id	Fold Change	pValue	GPI (Index in the sparse matrix)	Signal(Bottom)	Signal(Top)	Description
C1GR65	-2.32426	0.0135789	2219	0.000180173	7.75182e-05	Uncharacterized protein OS=Paracoccidioides lutzii (strain ATCC MYA-826 / Pb01) OX=502779 GN=PAAG_01010 PE=4 SV=1
C1H4S2	-2.30015	0.00844426	1663	0.000263556	0.000114582	Uncharacterized protein OS=Paracoccidioides lutzii (strain ATCC MYA-826 / Pb01) OX=502779 GN=PAAG_05762 PE=4 SV=2
C1GRJ9	-2.12155	0.00833101	407	0.000470404	0.000221727	Aspartate aminotransferase OS=Paracoccidioides lutzii (strain ATCC MYA-826 / Pb01) OX=502779 GN=PAAG_01144 PE=4 SV=1
C1GTV1	-1.97919	0.02381	1099	0.000180063	9.09781e-05	Transthyretin domain-containing protein OS=Paracoccidioides lutzii (strain ATCC MYA-826 / Pb01) OX=502779 GN=PAAG_01946 PE=4 SV=1
C1H9I3	-1.88198	0.0289458	2064	0.000151566	8.05354e-05	Prenylcysteine oxidase OS=Paracoccidioides lutzii (strain ATCC MYA-826 / Pb01) OX=502779 GN=PAAG_07424 PE=4 SV=2
C1H2Z6	-1.8707	0.0102429	1688	0.00019447	0.000103956	Uncharacterized protein OS=Paracoccidioides lutzii (strain ATCC MYA-826 / Pb01) OX=502779 GN=PAAG_05139 PE=4 SV=1
C1H482	-1.85967	0.0918165	2033	0.000218354	0.000117416	Uncharacterized protein OS=Paracoccidioides lutzii (strain ATCC MYA-826 / Pb01) OX=502779 GN=PAAG_05575 PE=4 SV=2
C1H8J8	-1.82301	0.0267474	480	0.000210129	0.000115265	Endoplasmic reticulum vesicle protein OS=Paracoccidioides lutzii (strain ATCC MYA-826 / Pb01) OX=502779 GN=PAAG_06994 PE=3 SV=2
C1GNX9	-1.78001	0.0118002	481	0.000231129	0.000129847	Cut9-interacting protein scn1 OS=Paracoccidioides lutzii (strain ATCC MYA-826 / Pb01) OX=502779 GN=PAAG_00224 PE=4 SV=2
C1GRF8	-1.779	0.110524	502	0.000225695	0.000126867	Uncharacterized protein OS=Paracoccidioides lutzii (strain ATCC MYA-826 / Pb01) OX=502779 GN=PAAG_01103 PE=4 SV=1
C1H847	-1.74938	0.206769	2223	0.000170737	9.75987e-05	Autophagy-related protein 24 OS=Paracoccidioides lutzii (strain ATCC MYA-826 / Pb01) OX=502779 GN=PAAG_07024 PE=4 SV=1
C1GWC9	-1.74415	0.0239243	465	0.00022595	0.000129548	Mitochondrial import inner membrane translocase subunit TIM44 OS=Paracoccidioides lutzii (strain ATCC MYA-826 / Pb01) OX=502779 GN=PAAG_02824 PE=3 SV=1
C1H7K8	-1.71614	0.0230434	2036	0.00011078	6.45518e-05	Uncharacterized protein OS=Paracoccidioides lutzii (strain ATCC MYA-826 / Pb01) OX=502779 GN=PAAG_06749 PE=4 SV=1
C1H7E3	-1.71491	0.0214586	857	0.000334929	0.000195304	Uncharacterized protein OS=Paracoccidioides lutzii (strain ATCC MYA-826 / Pb01) OX=502779 GN=PAAG_06684 PE=4 SV=2
C1GVW4	-1.71456	0.0420619	1394	0.000138844	8.09797e-05	Vacuolar protein-sorting-associated protein OS=Paracoccidioides lutzii (strain ATCC MYA-826 / Pb01) OX=502779 GN=PAAG_02659 PE=4 SV=1
A0A0A2VMD5	-1.70143	0.0132778	2220	0.000110765	6.51013e-05	Mitochondrial import inner membrane translocase subunit tim10 OS=Paracoccidioides lutzii (strain ATCC MYA-826 / Pb01) OX=502779 GN=PAAG_11189 PE=4 SV=1
C1GNQ8	-1.67438	0.083253	1131	0.000279873	0.00016715	Structural maintenance of chromosomes protein OS=Paracoccidioides lutzii (strain ATCC MYA-826 / Pb01) OX=502779 GN=PAAG_00153 PE=3 SV=2
C1GXB2	-1.67308	0.00897231	2232	0.00018918	0.000113073	DNA topoisomerase 2 OS=Paracoccidioides lutzii (strain ATCC MYA-826 / Pb01) OX=502779 GN=PAAG_03486 PE=3 SV=2
C1H7I5	-1.65047	0.0303702	653	0.000193815	0.00011743	Serine/threonine-protein kinase srk1 OS=Paracoccidioides lutzii (strain ATCC MYA-826 / Pb01) OX=502779 GN=PAAG_06726 PE=4 SV=2
C1H523	-1.64516	0.0385269	561	0.000158367	9.62624e-05	Uncharacterized protein OS=Paracoccidioides lutzii (strain ATCC MYA-826 / Pb01) OX=502779 GN=PAAG_05864 PE=4 SV=2
C1HCV2	-1.62237	0.0779832	513	0.000104545	6.44395e-05	Serine/threonine-protein phosphatase OS=Paracoccidioides lutzii (strain ATCC MYA-826 / Pb01) OX=502779 GN=PAAG_08593 PE=3 SV=2
C1HBQ9	-1.61984	0.0120501	232	0.000234936	0.000145036	Mitochondrial 2-oxoglutarate/malate carrier protein OS=Paracoccidioides lutzii (strain ATCC MYA-826 / Pb01) OX=502779 GN=PAAG_08200 PE=3 SV=1
C1GZK2	-1.61971	0.0148092	142	0.000318933	0.000196907	3' exoribonuclease family protein OS=Paracoccidioides lutzii (strain ATCC MYA-826 / Pb01) OX=502779 GN=PAAG_03946 PE=4 SV=1
A0A0A2V1Y8	-1.61764	0.0509796	578	0.000206768	0.000127821	Uncharacterized protein OS=Paracoccidioides lutzii (strain ATCC MYA-826 / Pb01) OX=502779 GN=PAAG_11367 PE=4 SV=1
C1HB88	-1.61668	0.136114	668	0.000173086	0.000107063	Peroxisomal membrane protein PMP34 OS=Paracoccidioides lutzii (strain ATCC MYA-826 / Pb01) OX=502779 GN=PAAG_08029 PE=3 SV=1
C1GQQ2	-1.61303	0.0500883	1363	0.000208585	0.000129313	Uncharacterized protein OS=Paracoccidioides lutzii (strain ATCC MYA-826 / Pb01) OX=502779 GN=PAAG_00847 PE=4 SV=1
C1GWA7	-1.60489	0.0679947	1405	0.000166267	0.0001036	Ankyrin repeat-containing protein OS=Paracoccidioides lutzii (strain ATCC MYA-826 / Pb01) OX=502779 GN=PAAG_02802 PE=4 SV=1
C1HD08	-1.60448	0.048164	1724	0.000207499	0.000129324	Cysteine dioxygenase OS=Paracoccidioides lutzii (strain ATCC MYA-826 / Pb01) OX=502779 GN=PAAG_08649 PE=3 SV=2
C1H2Q6	-1.58974	0.0693714	183	0.000206484	0.000129885	Metallo-beta-lactamase domain-containing protein OS=Paracoccidioides lutzii (strain ATCC MYA-826 / Pb01) OX=502779 GN=PAAG_05049 PE=4 SV=2
C1H818	-1.57357	0.103177	1367	0.000178656	0.000113535	Succinate dehydrogenase assembly factor 2, mitochondrial OS=Paracoccidioides lutzii (strain ATCC MYA-826 / Pb01) OX=502779 GN=PAAG_06995 PE=3 SV=2
C1GRJ1	-1.55082	0.0850644	1382	0.000221178	0.00014262	Beta-hexosaminidase OS=Paracoccidioides lutzii (strain ATCC MYA-826 / Pb01) OX=502779 GN=PAAG_01136 PE=3 SV=1
C1H8R8	-1.54832	0.0108192	396	0.000622513	0.000402056	Bud site selection protein OS=Paracoccidioides lutzii (strain ATCC MYA-826 / Pb01) OX=502779 GN=PAAG_07159 PE=4 SV=1
C1H709	-1.54742	0.0382951	1117	0.000321177	0.000207556	Uncharacterized protein OS=Paracoccidioides lutzii (strain ATCC MYA-826 / Pb01) OX=502779 GN=PAAG_06550 PE=4 SV=2
C1HA05	-1.5455	0.0118361	1558	0.000680294	0.000440178	Adenylyl cyclase-associated protein OS=Paracoccidioides lutzii (strain ATCC MYA-826 / Pb01) OX=502779 GN=PAAG_07734 PE=3 SV=1
C1H1F2	-1.52462	0.0142603	811	0.000456549	0.00029945	Acetamidase OS=Paracoccidioides lutzii (strain ATCC MYA-826 / Pb01) OX=502779 GN=PAAG_04596 PE=4 SV=1
C1H391	-1.51094	0.0505595	182	0.0001939	0.00012833	Vesicle-associated membrane protein OS=Paracoccidioides lutzii (strain ATCC MYA-826 / Pb01) OX=502779 GN=PAAG_05234 PE=3 SV=1
C1HB73	-1.49657	0.0206872	1308	0.000695902	0.000464997	M protein repeat protein OS=Paracoccidioides lutzii (strain ATCC MYA-826 / Pb01) OX=502779 GN=PAAG_08014 PE=4 SV=2
C1GSV5	-1.49654	0.0762891	246	0.000122448	8.18209e-05	N-acetyltransferase ats1 OS=Paracoccidioides lutzii (strain ATCC MYA-826 / Pb01) OX=502779 GN=PAAG_01600 PE=4 SV=2
C1H9F4	-1.49477	0.0471199	132	0.000289922	0.000193958	Nucleolar protein NOP56 OS=Paracoccidioides lutzii (strain ATCC MYA-826 / Pb01) OX=502779 GN=PAAG_07395 PE=4 SV=1
C1H8F1	-1.49324	0.0111482	1932	0.00104093	0.000697099	Gamma-glutamyltranspeptidase OS=Paracoccidioides lutzii (strain ATCC MYA-826 / Pb01) OX=502779 GN=PAAG_06947 PE=4 SV=2
C1H491	-1.49203	0.0115522	835	0.000445501	0.000298587	Peroxisomal adenine nucleotide transporter 1 OS=Paracoccidioides lutzii (strain ATCC MYA-826 / Pb01) OX=502779 GN=PAAG_05584 PE=3 SV=1
C1GWH1	-1.4889	0.0805073	1098	0.000250179	0.000168029	Uncharacterized protein OS=Paracoccidioides lutzii (strain ATCC MYA-826 / Pb01) OX=502779 GN=PAAG_02866 PE=4 SV=2
A0A0A2VLV4	-1.48337	0.0149242	877	0.000173173	0.000116743	Uncharacterized protein OS=Paracoccidioides lutzii (strain ATCC MYA-826 / Pb01) OX=502779 GN=PAAG_11414 PE=4 SV=1
C1HDS1	-1.47882	0.0652594	1319	0.000482023	0.000325951	Lactoylglutathione lyase OS=Paracoccidioides lutzii (strain ATCC MYA-826 / Pb01) OX=502779 GN=PAAG_08914 PE=4 SV=2
C1GTN2	-1.47763	0.0362178	143	0.000404129	0.000273498	Vacuolar protein sorting-associated protein 35 OS=Paracoccidioides lutzii (strain ATCC MYA-826 / Pb01) OX=502779 GN=PAAG_01877 PE=3 SV=2
C1GP72	-1.45465	0.0156592	187	0.000208	0.000142989	Septin 4 OS=Paracoccidioides lutzii (strain ATCC MYA-826 / Pb01) OX=502779 GN=PAAG_00317 PE=3 SV=1
C1GYE7	-1.45249	0.0240602	1103	0.000208669	0.000143662	Uncharacterized protein OS=Paracoccidioides lutzii (strain ATCC MYA-826 / Pb01) OX=502779 GN=PAAG_03101 PE=4 SV=1
C1H5E7	-1.44455	0.0136738	815	0.000263892	0.000182682	Flap endonuclease 1 OS=Paracoccidioides lutzii (strain ATCC MYA-826 / Pb01) OX=502779 GN=FEN1 PE=3 SV=2
C1H9H9	-1.43417	0.101671	176	0.000206786	0.000144185	Eukaryotic translation initiation factor 3 subunit K OS=Paracoccidioides lutzii (strain ATCC MYA-826 / Pb01) OX=502779 GN=PAAG_07420 PE=3 SV=2
C1H2N9	-1.43257	0.0774607	1726	0.000167242	0.000116743	Uncharacterized protein OS=Paracoccidioides lutzii (strain ATCC MYA-826 / Pb01) OX=502779 GN=PAAG_05032 PE=4 SV=1
C1GUQ6	-1.43155	0.0235362	1893	0.000333899	0.000233242	Uncharacterized protein OS=Paracoccidioides lutzii (strain ATCC MYA-826 / Pb01) OX=502779 GN=PAAG_02379 PE=4 SV=2
C1GSY7	-1.42739	0.0928313	215	0.000316528	0.000221753	Ribulose-phosphate 3-epimerase OS=Paracoccidioides lutzii (strain ATCC MYA-826 / Pb01) OX=502779 GN=PAAG_01632 PE=3 SV=2
C1GXA1	-1.42615	0.0871208	2216	0.000111587	7.82436e-05	Uncharacterized protein OS=Paracoccidioides lutzii (strain ATCC MYA-826 / Pb01) OX=502779 GN=PAAG_03475 PE=4 SV=1
C1GSJ4	-1.42603	0.0347385	448	0.000276516	0.000193906	Uncharacterized protein OS=Paracoccidioides lutzii (strain ATCC MYA-826 / Pb01) OX=502779 GN=PAAG_01489 PE=4 SV=2
C1GPW0	-1.42577	0.0108694	2279	0.00038951	0.000273192	Coatomer subunit epsilon OS=Paracoccidioides lutzii (strain ATCC MYA-826 / Pb01) OX=502779 GN=PAAG_00555 PE=3 SV=2
C1GS50	-1.4249	0.049048	1335	0.000513942	0.000360686	Importin-8 OS=Paracoccidioides lutzii (strain ATCC MYA-826 / Pb01) OX=502779 GN=PAAG_01345 PE=4 SV=2
C1GPC2	-1.42061	0.0376107	1340	0.000500011	0.00035197	Uncharacterized protein OS=Paracoccidioides lutzii (strain ATCC MYA-826 / Pb01) OX=502779 GN=PAAG_00367 PE=4 SV=2
C1H3I8	-1.41776	0.0327192	483	0.000221573	0.000156285	Phosphatidylserine decarboxylase proenzyme 1, mitochondrial OS=Paracoccidioides lutzii (strain ATCC MYA-826 / Pb01) OX=502779 GN=PSD1 PE=3 SV=1
C1H6X6	-1.41762	0.0690457	863	0.000156729	0.000110558	Protein YOP1 OS=Paracoccidioides lutzii (strain ATCC MYA-826 / Pb01) OX=502779 GN=PAAG_06517 PE=3 SV=1
C1H0J7	-1.41505	0.00917063	2260	0.00118169	0.000835084	Nucleoside diphosphate kinase OS=Paracoccidioides lutzii (strain ATCC MYA-826 / Pb01) OX=502779 GN=PAAG_04291 PE=3 SV=1
C1HAZ0	-1.41456	0.086243	664	0.00020696	0.000146307	VHS domain-containing protein OS=Paracoccidioides lutzii (strain ATCC MYA-826 / Pb01) OX=502779 GN=PAAG_07854 PE=4 SV=2
C1H5N3	-1.41264	0.169826	1806	0.000162221	0.000114835	Translocation protein SEC62 OS=Paracoccidioides lutzii (strain ATCC MYA-826 / Pb01) OX=502779 GN=PAAG_06228 PE=4 SV=1
C1GSI5	-1.41186	0.0442566	496	0.000139274	9.86457e-05	Calcium permease family membrane transporter OS=Paracoccidioides lutzii (strain ATCC MYA-826 / Pb01) OX=502779 GN=PAAG_01480 PE=3 SV=1
C1H3T2	-1.40773	0.0283967	1984	0.000290966	0.000206692	Golgi membrane protein (Coy1) OS=Paracoccidioides lutzii (strain ATCC MYA-826 / Pb01) OX=502779 GN=PAAG_05425 PE=4 SV=1
C1GNT7	-1.40611	0.0963108	827	0.000250318	0.000178021	Cell division control protein OS=Paracoccidioides lutzii (strain ATCC MYA-826 / Pb01) OX=502779 GN=PAAG_00182 PE=3 SV=1
C1GVN3	-1.40068	0.0573424	2236	0.000180118	0.000128594	DNA helicase OS=Paracoccidioides lutzii (strain ATCC MYA-826 / Pb01) OX=502779 GN=PAAG_02310 PE=3 SV=2
C1H522	-1.39498	0.102617	1632	0.000401371	0.000287726	M protein repeat protein OS=Paracoccidioides lutzii (strain ATCC MYA-826 / Pb01) OX=502779 GN=PAAG_05863 PE=4 SV=1
C1GRV9	-1.39015	0.0530318	1662	0.000180772	0.000130038	Uncharacterized protein OS=Paracoccidioides lutzii (strain ATCC MYA-826 / Pb01) OX=502779 GN=PAAG_01254 PE=4 SV=2
C1H2X8	-1.38453	0.112511	2240	0.000110863	8.0073e-05	Phosducin family protein OS=Paracoccidioides lutzii (strain ATCC MYA-826 / Pb01) OX=502779 GN=PAAG_05121 PE=4 SV=2
C1GQQ0	-1.37606	0.202343	1408	0.000135677	9.85983e-05	LSM domain-containing protein OS=Paracoccidioides lutzii (strain ATCC MYA-826 / Pb01) OX=502779 GN=PAAG_00845 PE=4 SV=1
C1HCE3	-1.37443	0.0454206	199	0.000325827	0.000237063	FACT complex subunit spt16 OS=Paracoccidioides lutzii (strain ATCC MYA-826 / Pb01) OX=502779 GN=PAAG_08434 PE=4 SV=2
C1GPD1	-1.37405	0.0204707	808	0.000429991	0.000312937	Eukaryotic translation initiation factor 3 subunit F OS=Paracoccidioides lutzii (strain ATCC MYA-826 / Pb01) OX=502779 GN=PAAG_00376 PE=3 SV=1
C1H0Q4	-1.37163	0.0200778	1317	0.000499942	0.000364488	Homoserine kinase OS=Paracoccidioides lutzii (strain ATCC MYA-826 / Pb01) OX=502779 GN=PAAG_04348 PE=3 SV=2
C1H4E7	-1.3689	0.239283	860	0.000121735	8.89288e-05	Transcription initiation factor TFIID subunit 5 OS=Paracoccidioides lutzii (strain ATCC MYA-826 / Pb01) OX=502779 GN=PAAG_05640 PE=4 SV=1
C1GTX4	-1.36778	0.0230651	1025	0.000638659	0.000466933	Arginase OS=Paracoccidioides lutzii (strain ATCC MYA-826 / Pb01) OX=502779 GN=PAAG_01969 PE=3 SV=2
C1GYM8	-1.36141	0.00859012	1651	0.000388118	0.000285086	Peptide hydrolase OS=Paracoccidioides lutzii (strain ATCC MYA-826 / Pb01) OX=502779 GN=PAAG_03182 PE=3 SV=1
C1HD44	-1.35855	0.0224821	1990	0.000319532	0.000235201	NAD(P)H-hydrate epimerase OS=Paracoccidioides lutzii (strain ATCC MYA-826 / Pb01) OX=502779 GN=PAAG_08685 PE=3 SV=2
C1H7Y7	-1.35622	0.0884183	162	0.000193494	0.000142672	V-type proton ATPase subunit G OS=Paracoccidioides lutzii (strain ATCC MYA-826 / Pb01) OX=502779 GN=PAAG_06878 PE=3 SV=2
C1GRY4	-1.35538	0.0595242	1059	0.00045967	0.000339145	Patched sphingolipid transporter (Ncr1) OS=Paracoccidioides lutzii (strain ATCC MYA-826 / Pb01) OX=502779 GN=PAAG_01279 PE=4 SV=2
C1GU24	-1.35172	0.0556607	120	0.000403347	0.000298396	Uncharacterized protein OS=Paracoccidioides lutzii (strain ATCC MYA-826 / Pb01) OX=502779 GN=PAAG_02019 PE=4 SV=2
C1GRD1	-1.34707	0.134501	2029	8.74902e-05	6.49487e-05	Uncharacterized protein OS=Paracoccidioides lutzii (strain ATCC MYA-826 / Pb01) OX=502779 GN=PAAG_01076 PE=3 SV=2
C1HE55	-1.3454	0.0372594	1872	0.000403292	0.000299756	Uncharacterized protein OS=Paracoccidioides lutzii (strain ATCC MYA-826 / Pb01) OX=502779 GN=PAAG_09048 PE=4 SV=2
C1GPZ4	-1.3449	0.0857389	824	0.000192085	0.000142825	Glucosamine 6-phosphate N-acetyltransferase OS=Paracoccidioides lutzii (strain ATCC MYA-826 / Pb01) OX=502779 GN=PAAG_00589 PE=3 SV=1
C1H185	-1.34345	0.0933912	115	0.000348168	0.00025916	Uncharacterized protein OS=Paracoccidioides lutzii (strain ATCC MYA-826 / Pb01) OX=502779 GN=PAAG_04529 PE=4 SV=2
C1GWZ2	-1.34027	0.072262	432	0.000207861	0.000155089	Phytanoyl-CoA dioxygenase family protein OS=Paracoccidioides lutzii (strain ATCC MYA-826 / Pb01) OX=502779 GN=PAAG_03366 PE=4 SV=1
C1GSV2	-1.33588	0.00972816	1860	0.000694552	0.00051992	Uncharacterized protein OS=Paracoccidioides lutzii (strain ATCC MYA-826 / Pb01) OX=502779 GN=PAAG_01597 PE=4 SV=2
C1HAX7	-1.33083	0.0125816	2273	0.000778311	0.000584831	Uncharacterized protein OS=Paracoccidioides lutzii (strain ATCC MYA-826 / Pb01) OX=502779 GN=PAAG_07841 PE=3 SV=1
C1H873	-1.3269	0.0483194	150	0.000292374	0.000220343	Uncharacterized protein OS=Paracoccidioides lutzii (strain ATCC MYA-826 / Pb01) OX=502779 GN=PAAG_07050 PE=4 SV=2
C1GU21	-1.32527	0.0240142	378	0.000636627	0.000480375	3-hydroxy-3-methylglutaryl coenzyme A synthase OS=Paracoccidioides lutzii (strain ATCC MYA-826 / Pb01) OX=502779 GN=PAAG_02016 PE=3 SV=2
C1GNM5	-1.32196	0.10859	810	0.000276866	0.000209437	Uncharacterized protein OS=Paracoccidioides lutzii (strain ATCC MYA-826 / Pb01) OX=502779 GN=PAAG_00120 PE=4 SV=2
C1H336	-1.3191	0.0600067	2214	0.000222535	0.000168702	Vacuolar membrane protein OS=Paracoccidioides lutzii (strain ATCC MYA-826 / Pb01) OX=502779 GN=PAAG_05179 PE=4 SV=2
C1GXD8	-1.31673	0.0912146	1075	0.000359971	0.000273383	Carboxypeptidase Y homolog A OS=Paracoccidioides lutzii (strain ATCC MYA-826 / Pb01) OX=502779 GN=CPYA PE=3 SV=1
C1HAQ7	-1.31259	0.0597529	147	0.000289436	0.000220508	Uncharacterized protein OS=Paracoccidioides lutzii (strain ATCC MYA-826 / Pb01) OX=502779 GN=PAAG_07886 PE=4 SV=2
C1H7L1	-1.31245	0.0147326	783	0.000221628	0.000168866	Uncharacterized protein OS=Paracoccidioides lutzii (strain ATCC MYA-826 / Pb01) OX=502779 GN=PAAG_06752 PE=4 SV=2
C1H2L1	-1.31095	0.0270956	1047	0.000527448	0.00040234	EH domain binding protein epsin 2 OS=Paracoccidioides lutzii (strain ATCC MYA-826 / Pb01) OX=502779 GN=PAAG_05004 PE=4 SV=1
C1HCH2	-1.31009	0.0107232	2335	0.000374657	0.000285979	Oxidoreductase OS=Paracoccidioides lutzii (strain ATCC MYA-826 / Pb01) OX=502779 GN=PAAG_08463 PE=4 SV=1
C1H0B1	-1.30196	0.0436694	130	0.000594239	0.00045642	Vacuolar aminopeptidase OS=Paracoccidioides lutzii (strain ATCC MYA-826 / Pb01) OX=502779 GN=PAAG_04205 PE=3 SV=1
C1HCX9	-1.29529	0.0113666	65	0.00100964	0.000779471	ADP,ATP carrier protein OS=Paracoccidioides lutzii (strain ATCC MYA-826 / Pb01) OX=502779 GN=PAAG_08620 PE=3 SV=1
C1GRJ6	-1.29247	0.0400864	1322	0.000554537	0.000429052	Tyrosine--tRNA ligase OS=Paracoccidioides lutzii (strain ATCC MYA-826 / Pb01) OX=502779 GN=PAAG_01141 PE=3 SV=1
C1HA63	-1.28779	0.0245351	818	0.000318947	0.000247671	Uncharacterized protein OS=Paracoccidioides lutzii (strain ATCC MYA-826 / Pb01) OX=502779 GN=PAAG_07792 PE=4 SV=2
C1HC65	-1.28664	0.0361706	1164	0.000290966	0.000226145	AP complex subunit beta OS=Paracoccidioides lutzii (strain ATCC MYA-826 / Pb01) OX=502779 GN=PAAG_08356 PE=3 SV=2
C1HCC7	-1.2775	0.0219116	56	0.00123269	0.000964925	Proteasome subunit beta OS=Paracoccidioides lutzii (strain ATCC MYA-826 / Pb01) OX=502779 GN=PAAG_08418 PE=3 SV=2
A0A0A2V4B7	-1.27455	0.0281607	123	0.000513932	0.000403227	Uncharacterized protein OS=Paracoccidioides lutzii (strain ATCC MYA-826 / Pb01) OX=502779 GN=PAAG_12104 PE=4 SV=1
C1GQ69	-1.26743	0.00875983	713	0.00120666	0.000952052	Aspartyl aminopeptidase OS=Paracoccidioides lutzii (strain ATCC MYA-826 / Pb01) OX=502779 GN=PAAG_00664 PE=4 SV=1
C1H9I5	-1.26079	0.0106126	1074	0.000263	0.000208599	Prefoldin subunit 3 OS=Paracoccidioides lutzii (strain ATCC MYA-826 / Pb01) OX=502779 GN=PAAG_07426 PE=3 SV=1
C1H6S1	-1.25705	0.0109943	1334	0.000360973	0.00028716	Uncharacterized protein OS=Paracoccidioides lutzii (strain ATCC MYA-826 / Pb01) OX=502779 GN=PAAG_06462 PE=4 SV=1
C1HE50	-1.2328	0.00866579	26	0.00160526	0.00130213	40S ribosomal protein S2 OS=Paracoccidioides lutzii (strain ATCC MYA-826 / Pb01) OX=502779 GN=PAAG_09043 PE=3 SV=1
C1HA75	1.24491	0.00852575	55	0.000775304	0.000965183	D-lactate dehydrogenase OS=Paracoccidioides lutzii (strain ATCC MYA-826 / Pb01) OX=502779 GN=PAAG_07804 PE=4 SV=2
C1H303	1.25589	0.00989257	1881	0.000498257	0.000625756	Ribose 5-phosphate isomerase A OS=Paracoccidioides lutzii (strain ATCC MYA-826 / Pb01) OX=502779 GN=PAAG_05146 PE=4 SV=1
C1GQB0	1.27026	0.0138109	2174	0.000429475	0.000545544	Mitochondrial presequence protease OS=Paracoccidioides lutzii (strain ATCC MYA-826 / Pb01) OX=502779 GN=PAAG_00705 PE=4 SV=1
C1H5C1	1.27193	0.010012	348	0.000512402	0.000651738	26S proteasome non-ATPase regulatory subunit 3 OS=Paracoccidioides lutzii (strain ATCC MYA-826 / Pb01) OX=502779 GN=PAAG_05962 PE=4 SV=2
C1GT59	1.27217	0.0259374	1745	0.000139311	0.000177227	SAM-dependent methyltransferase UbiE/COQ5 family protein OS=Paracoccidioides lutzii (strain ATCC MYA-826 / Pb01) OX=502779 GN=PAAG_01704 PE=4 SV=2
C1HBL1	1.27352	0.0101136	1891	0.000388885	0.000495251	3',5'-bisphosphate nucleotidase OS=Paracoccidioides lutzii (strain ATCC MYA-826 / Pb01) OX=502779 GN=PAAG_08152 PE=4 SV=1
C1H4P2	1.27699	0.0297875	1862	0.000500596	0.000639257	NADH-ubiquinone oxidoreductase 49 kDa subunit OS=Paracoccidioides lutzii (strain ATCC MYA-826 / Pb01) OX=502779 GN=PAAG_05735 PE=3 SV=1
C1GTU0	1.28289	0.0154858	1310	0.000567358	0.000727855	Formyl-coenzyme A transferase OS=Paracoccidioides lutzii (strain ATCC MYA-826 / Pb01) OX=502779 GN=PAAG_01935 PE=4 SV=1
C1GP81	1.29223	0.0106121	1894	0.000291858	0.000377148	Uncharacterized protein OS=Paracoccidioides lutzii (strain ATCC MYA-826 / Pb01) OX=502779 GN=PAAG_00326 PE=4 SV=1
C1HCV1	1.29291	0.0437265	1977	0.000290898	0.000376105	Uncharacterized protein OS=Paracoccidioides lutzii (strain ATCC MYA-826 / Pb01) OX=502779 GN=PAAG_08592 PE=4 SV=2
C1GTV6	1.29771	0.0271202	754	0.000430396	0.000558532	Eukaryotic translation initiation factor 3 subunit E OS=Paracoccidioides lutzii (strain ATCC MYA-826 / Pb01) OX=502779 GN=INT6 PE=3 SV=2
A0A0A2VKF4	1.29788	0.0409993	135	0.000290312	0.00037679	Uncharacterized protein OS=Paracoccidioides lutzii (strain ATCC MYA-826 / Pb01) OX=502779 GN=PAAG_11955 PE=4 SV=1
C1H113	1.2996	0.0466052	1329	0.000289253	0.000375914	Ubiquinol-cytochrome c reductase complex ubiquinone-binding protein OS=Paracoccidioides lutzii (strain ATCC MYA-826 / Pb01) OX=502779 GN=PAAG_04457 PE=4 SV=1
C1GNU3	1.30032	0.058565	2206	0.000180048	0.00023412	Uncharacterized protein OS=Paracoccidioides lutzii (strain ATCC MYA-826 / Pb01) OX=502779 GN=PAAG_00188 PE=4 SV=2
C1HE74	1.30234	0.0598523	88	0.000429033	0.000558749	Mitochondrial nuclease OS=Paracoccidioides lutzii (strain ATCC MYA-826 / Pb01) OX=502779 GN=PAAG_09072 PE=4 SV=1
C1GXQ5	1.30259	0.0352583	1700	0.000290298	0.000378138	Xanthine dehydrogenase OS=Paracoccidioides lutzii (strain ATCC MYA-826 / Pb01) OX=502779 GN=PAAG_03629 PE=4 SV=2
C1H4R9	1.30449	0.0681839	1352	0.000289115	0.000377148	Uncharacterized protein OS=Paracoccidioides lutzii (strain ATCC MYA-826 / Pb01) OX=502779 GN=PAAG_05759 PE=4 SV=2
C1GT20	1.30588	0.00938462	937	0.000955492	0.00124776	PKHD-type hydroxylase TPA1 OS=Paracoccidioides lutzii (strain ATCC MYA-826 / Pb01) OX=502779 GN=PAAG_01665 PE=4 SV=1
C1HAL8	1.30824	0.0178165	1634	0.000458307	0.000599574	Cytochrome b-c1 complex subunit 7 OS=Paracoccidioides lutzii (strain ATCC MYA-826 / Pb01) OX=502779 GN=PAAG_07672 PE=3 SV=1
C1GQM3	1.31291	0.0684474	1420	0.000138746	0.000182161	Uncharacterized protein OS=Paracoccidioides lutzii (strain ATCC MYA-826 / Pb01) OX=502779 GN=PAAG_00818 PE=4 SV=2
C1HBB1	1.31485	0.0615271	136	0.000278146	0.000365721	Long-chain-fatty-acid-CoA ligase OS=Paracoccidioides lutzii (strain ATCC MYA-826 / Pb01) OX=502779 GN=PAAG_08052 PE=4 SV=1
C1H4B9	1.3151	0.0364889	1373	0.000346606	0.000455821	Pyridoxine kinase OS=Paracoccidioides lutzii (strain ATCC MYA-826 / Pb01) OX=502779 GN=PAAG_05612 PE=4 SV=2
C1H9Q1	1.32104	0.0089744	1652	0.000373835	0.000493853	Ethanolamine-phosphate cytidylyltransferase OS=Paracoccidioides lutzii (strain ATCC MYA-826 / Pb01) OX=502779 GN=PAAG_07492 PE=4 SV=1
C1H1V8	1.32123	0.035529	1646	0.000345854	0.000456954	Sporulation protein SPS19 OS=Paracoccidioides lutzii (strain ATCC MYA-826 / Pb01) OX=502779 GN=PAAG_04894 PE=4 SV=1
C1GU61	1.32313	0.0543882	1719	0.000235995	0.000312252	Uncharacterized protein OS=Paracoccidioides lutzii (strain ATCC MYA-826 / Pb01) OX=502779 GN=PAAG_02056 PE=4 SV=2
C1H0D9	1.32802	0.0493146	859	0.000165919	0.000220343	2-nitropropane dioxygenase OS=Paracoccidioides lutzii (strain ATCC MYA-826 / Pb01) OX=502779 GN=PAAG_04233 PE=4 SV=1
C1H9E6	1.32885	0.0760966	1638	0.000305126	0.000405466	Cell cycle control protein cwf14 OS=Paracoccidioides lutzii (strain ATCC MYA-826 / Pb01) OX=502779 GN=PAAG_07387 PE=4 SV=1
C1H2I4	1.33151	0.0307016	423	0.000166657	0.000221906	Ubiquitin-conjugating enzyme OS=Paracoccidioides lutzii (strain ATCC MYA-826 / Pb01) OX=502779 GN=PAAG_04977 PE=3 SV=2
C1GZ76	1.33311	0.105399	809	0.000233558	0.000311359	Sorting nexin-3 OS=Paracoccidioides lutzii (strain ATCC MYA-826 / Pb01) OX=502779 GN=PAAG_03820 PE=4 SV=1
C1GS74	1.33324	0.0399435	1361	0.000372275	0.000496332	Betaine aldehyde dehydrogenase OS=Paracoccidioides lutzii (strain ATCC MYA-826 / Pb01) OX=502779 GN=PAAG_01369 PE=3 SV=1
C1H7K9	1.33432	0.133524	823	0.000195263	0.000260543	Uncharacterized protein OS=Paracoccidioides lutzii (strain ATCC MYA-826 / Pb01) OX=502779 GN=PAAG_06750 PE=4 SV=2
C1GY97	1.33439	0.0392961	2175	0.000263709	0.000351892	NADH-ubiquinone oxidoreductase OS=Paracoccidioides lutzii (strain ATCC MYA-826 / Pb01) OX=502779 GN=PAAG_03051 PE=3 SV=2
C1HDR4	1.33763	0.0656493	313	0.000594298	0.000794952	Class E vacuolar protein-sorting machinery protein hse1 OS=Paracoccidioides lutzii (strain ATCC MYA-826 / Pb01) OX=502779 GN=PAAG_08907 PE=4 SV=2
C1GR92	1.33932	0.044029	1403	0.000194316	0.000260252	Dolichyl-diphosphooligosaccharide--protein glycosyltransferase subunit 1 OS=Paracoccidioides lutzii (strain ATCC MYA-826 / Pb01) OX=502779 GN=PAAG_01037 PE=3 SV=1
C1GY14	1.34052	0.0696232	1022	0.000290882	0.000389932	Cell wall alpha-1,3-glucan synthase mok11 OS=Paracoccidioides lutzii (strain ATCC MYA-826 / Pb01) OX=502779 GN=PAAG_03297 PE=4 SV=2
C1H4Q6	1.3411	0.0552296	421	0.000160292	0.000214968	Uncharacterized protein OS=Paracoccidioides lutzii (strain ATCC MYA-826 / Pb01) OX=502779 GN=PAAG_05746 PE=4 SV=1
C1GVW0	1.34653	0.116011	842	0.000250082	0.000336742	Nucleoporin SONB OS=Paracoccidioides lutzii (strain ATCC MYA-826 / Pb01) OX=502779 GN=PAAG_02655 PE=4 SV=2
C1HD23	1.34656	0.0876604	1388	0.000125048	0.000168384	Phenylacetate 2-hydroxylase OS=Paracoccidioides lutzii (strain ATCC MYA-826 / Pb01) OX=502779 GN=PAAG_08664 PE=4 SV=2
C1GYH5	1.35199	0.0428382	95	0.000220737	0.000298434	Uncharacterized protein OS=Paracoccidioides lutzii (strain ATCC MYA-826 / Pb01) OX=502779 GN=PAAG_03129 PE=4 SV=1
C1GSH2	1.35292	0.0148406	90	0.000344977	0.000466728	Uncharacterized protein OS=Paracoccidioides lutzii (strain ATCC MYA-826 / Pb01) OX=502779 GN=PAAG_01467 PE=4 SV=2
C1GNW6	1.35337	0.0864394	2211	0.000125048	0.000169236	Pyrimidine 5'-nucleotidase OS=Paracoccidioides lutzii (strain ATCC MYA-826 / Pb01) OX=502779 GN=PAAG_00211 PE=4 SV=1
C1HAK9	1.35544	0.159809	1100	0.000115029	0.000155915	SUMO-conjugating enzyme ubc9 OS=Paracoccidioides lutzii (strain ATCC MYA-826 / Pb01) OX=502779 GN=PAAG_07663 PE=3 SV=1
C1H6X9	1.35822	0.0157687	778	0.000458585	0.000622859	Uncharacterized protein OS=Paracoccidioides lutzii (strain ATCC MYA-826 / Pb01) OX=502779 GN=PAAG_06520 PE=4 SV=2
A0A0A2VIG6	1.36116	0.18344	1451	8.66542e-05	0.00011795	Uncharacterized protein OS=Paracoccidioides lutzii (strain ATCC MYA-826 / Pb01) OX=502779 GN=PAAG_12657 PE=4 SV=1
C1H399	1.36238	0.0994952	1433	0.000210284	0.000286487	Uncharacterized protein OS=Paracoccidioides lutzii (strain ATCC MYA-826 / Pb01) OX=502779 GN=PAAG_05242 PE=3 SV=2
C1GW64	1.36302	0.182082	437	0.000181539	0.000247442	NMDA receptor-regulated protein OS=Paracoccidioides lutzii (strain ATCC MYA-826 / Pb01) OX=502779 GN=PAAG_02759 PE=4 SV=1
C1GSR3	1.36534	0.0439775	1693	0.000180103	0.000245902	Uncharacterized protein OS=Paracoccidioides lutzii (strain ATCC MYA-826 / Pb01) OX=502779 GN=PAAG_01558 PE=4 SV=1
C1H659	1.37005	0.0176351	2207	0.000331684	0.000454423	Rab proteins geranylgeranyltransferase OS=Paracoccidioides lutzii (strain ATCC MYA-826 / Pb01) OX=502779 GN=PAAG_06169 PE=3 SV=1
C1GVP6	1.37256	0.109429	2085	0.000226205	0.000310481	Uncharacterized protein OS=Paracoccidioides lutzii (strain ATCC MYA-826 / Pb01) OX=502779 GN=PAAG_02323 PE=4 SV=2
A0A0A2VMR4	1.37322	0.0103853	1325	0.00041536	0.00057038	Eukaryotic translation initiation factor 5A OS=Paracoccidioides lutzii (strain ATCC MYA-826 / Pb01) OX=502779 GN=PAAG_11075 PE=4 SV=1
C1GU17	1.3733	0.0916699	482	8.5768e-05	0.000117786	Streptomycin biosynthesis protein StrI OS=Paracoccidioides lutzii (strain ATCC MYA-826 / Pb01) OX=502779 GN=PAAG_02012 PE=4 SV=1
C1GY20	1.37975	0.146754	456	7.04146e-05	9.71544e-05	Glutaredoxin-like protein OS=Paracoccidioides lutzii (strain ATCC MYA-826 / Pb01) OX=502779 GN=PAAG_02974 PE=3 SV=1
C1H9J1	1.38661	0.0431447	757	0.000484767	0.000672184	Uncharacterized protein OS=Paracoccidioides lutzii (strain ATCC MYA-826 / Pb01) OX=502779 GN=PAAG_07432 PE=4 SV=2
C1GVI9	1.39557	0.0902714	1692	0.000206622	0.000288356	NADH-ubiquinone oxidoreductase 21 kDa subunit OS=Paracoccidioides lutzii (strain ATCC MYA-826 / Pb01) OX=502779 GN=PAAG_02266 PE=4 SV=1
C1HCT9	1.39631	0.0576735	1427	0.000167296	0.000233598	Thiosulfate sulfurtransferase OS=Paracoccidioides lutzii (strain ATCC MYA-826 / Pb01) OX=502779 GN=PAAG_08585 PE=4 SV=2
C1GT04	1.39735	0.164349	1091	0.000138392	0.000193383	Gamma-butyrobetaine dioxygenase OS=Paracoccidioides lutzii (strain ATCC MYA-826 / Pb01) OX=502779 GN=PAAG_01649 PE=4 SV=2
C1H8H4	1.4006	0.12991	1740	0.000102681	0.000143815	Uncharacterized protein OS=Paracoccidioides lutzii (strain ATCC MYA-826 / Pb01) OX=502779 GN=PAAG_06970 PE=4 SV=2
A0A0A2V0M4	1.40067	0.0658335	422	0.000138508	0.000194005	Uncharacterized protein OS=Paracoccidioides lutzii (strain ATCC MYA-826 / Pb01) OX=502779 GN=PAAG_12246 PE=4 SV=1
C1GQU1	1.40106	0.0459206	1087	0.000195055	0.000273284	Orotate phosphoribosyltransferase OS=Paracoccidioides lutzii (strain ATCC MYA-826 / Pb01) OX=502779 GN=PAAG_00886 PE=3 SV=1
C1GRN0	1.40211	0.0853337	1341	0.00013933	0.000195356	Uncharacterized protein OS=Paracoccidioides lutzii (strain ATCC MYA-826 / Pb01) OX=502779 GN=PAAG_01175 PE=4 SV=1
C1H8Q2	1.40486	0.0138683	411	0.000276684	0.000388701	Allantoicase OS=Paracoccidioides lutzii (strain ATCC MYA-826 / Pb01) OX=502779 GN=PAAG_07143 PE=3 SV=1
C1HD52	1.40593	0.0573216	2185	0.000193717	0.000272352	Uncharacterized protein OS=Paracoccidioides lutzii (strain ATCC MYA-826 / Pb01) OX=502779 GN=PAAG_08693 PE=4 SV=2
C1GRD5	1.40874	0.142118	1735	7.01596e-05	9.88368e-05	Uncharacterized protein OS=Paracoccidioides lutzii (strain ATCC MYA-826 / Pb01) OX=502779 GN=PAAG_01080 PE=4 SV=2
C1HAU2	1.40995	0.0479092	847	8.27989e-05	0.000116743	Uncharacterized protein OS=Paracoccidioides lutzii (strain ATCC MYA-826 / Pb01) OX=502779 GN=PAAG_07921 PE=4 SV=1
C1HA82	1.41137	0.0262106	1746	0.000165919	0.000234173	Sulfite oxidase OS=Paracoccidioides lutzii (strain ATCC MYA-826 / Pb01) OX=502779 GN=PAAG_07811 PE=4 SV=2
C1GUX9	1.41205	0.0520884	1350	0.000248747	0.000351245	DNA ligase OS=Paracoccidioides lutzii (strain ATCC MYA-826 / Pb01) OX=502779 GN=PAAG_02452 PE=3 SV=2
C1HEA1	1.41246	0.0242569	178	0.000157214	0.000222059	Geranylgeranyl transferase type-2 subunit beta OS=Paracoccidioides lutzii (strain ATCC MYA-826 / Pb01) OX=502779 GN=PAAG_09100 PE=3 SV=2
A0A0A2V255	1.41376	0.0328122	122	0.000359414	0.000508124	Myosin-1 OS=Paracoccidioides lutzii (strain ATCC MYA-826 / Pb01) OX=502779 GN=PAAG_11706 PE=3 SV=1
A0A0A2V6Y2	1.41547	0.0533163	1106	8.29519e-05	0.000117416	Uncharacterized protein OS=Paracoccidioides lutzii (strain ATCC MYA-826 / Pb01) OX=502779 GN=PAAG_11036 PE=4 SV=1
C1GWU8	1.41635	0.046703	179	0.00011071	0.000156805	40S ribosomal protein S20 OS=Paracoccidioides lutzii (strain ATCC MYA-826 / Pb01) OX=502779 GN=PAAG_03322 PE=3 SV=1
C1H519	1.41823	0.0306421	2333	0.00034896	0.000494907	Glutamate-cysteine ligase OS=Paracoccidioides lutzii (strain ATCC MYA-826 / Pb01) OX=502779 GN=PAAG_05860 PE=4 SV=2
C1H7Y3	1.4196	0.114335	2062	0.000237387	0.000336995	Rhodocoxin reductase OS=Paracoccidioides lutzii (strain ATCC MYA-826 / Pb01) OX=502779 GN=PAAG_06874 PE=4 SV=2
C1GZT6	1.42058	0.0481655	374	0.00029445	0.000418291	Short-chain-fatty-acid-CoA ligase OS=Paracoccidioides lutzii (strain ATCC MYA-826 / Pb01) OX=502779 GN=PAAG_04030 PE=4 SV=2
A0A0A2V1U3	1.42184	0.0860529	1459	0.000136743	0.000194426	3-oxoacyl-[acyl-carrier-protein] synthase OS=Paracoccidioides lutzii (strain ATCC MYA-826 / Pb01) OX=502779 GN=PAAG_11454 PE=3 SV=1
C1GPV1	1.43123	0.0376843	1432	0.00015429	0.000220825	ATP-binding cassette OS=Paracoccidioides lutzii (strain ATCC MYA-826 / Pb01) OX=502779 GN=PAAG_00546 PE=4 SV=2
C1GW67	1.43405	0.105255	1088	0.000208014	0.000298303	Anthranilate phosphoribosyltransferase OS=Paracoccidioides lutzii (strain ATCC MYA-826 / Pb01) OX=502779 GN=PAAG_02762 PE=4 SV=1
C1GXS0	1.43498	0.125196	1447	0.000314533	0.000451349	6-phosphofructo-2-kinase OS=Paracoccidioides lutzii (strain ATCC MYA-826 / Pb01) OX=502779 GN=PAAG_03643 PE=4 SV=2
C1HC57	1.43559	0.0267653	1993	0.000360721	0.000517846	Eukaryotic translation initiation factor 3 subunit I OS=Paracoccidioides lutzii (strain ATCC MYA-826 / Pb01) OX=502779 GN=TIF34 PE=3 SV=1
C1GP94	1.4379	0.0307658	2226	0.000180118	0.000258992	Poly(A)+ RNA export protein OS=Paracoccidioides lutzii (strain ATCC MYA-826 / Pb01) OX=502779 GN=PAAG_00339 PE=4 SV=1
C1GY40	1.43855	0.0493814	1043	0.000262208	0.0003772	Uncharacterized protein OS=Paracoccidioides lutzii (strain ATCC MYA-826 / Pb01) OX=502779 GN=PAAG_02994 PE=4 SV=2
C1H2U8	1.44075	0.0382982	1375	0.000180133	0.000259527	NADH-ubiquinone oxidoreductase 213 kDa subunit OS=Paracoccidioides lutzii (strain ATCC MYA-826 / Pb01) OX=502779 GN=PAAG_05091 PE=4 SV=1
C1GS25	1.44734	0.0147546	1355	0.000376287	0.000544616	Uncharacterized protein OS=Paracoccidioides lutzii (strain ATCC MYA-826 / Pb01) OX=502779 GN=PAAG_01320 PE=4 SV=2
C1GS68	1.45583	0.0573873	1019	0.000304833	0.000443786	N-acetylglucosamine-6-phosphate deacetylase OS=Paracoccidioides lutzii (strain ATCC MYA-826 / Pb01) OX=502779 GN=PAAG_01363 PE=4 SV=1
C1GYZ1	1.4569	0.127848	1404	0.000125201	0.000182405	Chaperone protein dnaJ OS=Paracoccidioides lutzii (strain ATCC MYA-826 / Pb01) OX=502779 GN=PAAG_03735 PE=3 SV=2
C1HBE5	1.4603	0.0685573	1666	0.000151498	0.000221233	Mitochondrial DNA replication protein YHM2 OS=Paracoccidioides lutzii (strain ATCC MYA-826 / Pb01) OX=502779 GN=PAAG_08086 PE=3 SV=1
C1H3C9	1.46421	0.0993617	814	0.000124895	0.000182872	Uncharacterized protein OS=Paracoccidioides lutzii (strain ATCC MYA-826 / Pb01) OX=502779 GN=PAAG_05272 PE=4 SV=1
C1GSS7	1.46518	0.0933846	779	0.000257492	0.000377272	Uncharacterized protein OS=Paracoccidioides lutzii (strain ATCC MYA-826 / Pb01) OX=502779 GN=PAAG_01572 PE=4 SV=1
C1GRZ7	1.46573	0.0271757	380	0.000222312	0.00032585	Eukaryotic peptide chain release factor GTP-binding subunit OS=Paracoccidioides lutzii (strain ATCC MYA-826 / Pb01) OX=502779 GN=PAAG_01292 PE=4 SV=1
C1GUI3	1.46688	0.0872336	2224	9.79732e-05	0.000143715	Diphthine synthase OS=Paracoccidioides lutzii (strain ATCC MYA-826 / Pb01) OX=502779 GN=PAAG_02178 PE=3 SV=1
A0A0A2V3J0	1.47249	0.0574064	1671	0.000193564	0.000285022	Uncharacterized protein OS=Paracoccidioides lutzii (strain ATCC MYA-826 / Pb01) OX=502779 GN=PAAG_11234 PE=4 SV=1
C1H184	1.47437	0.0772949	1649	0.000400785	0.000590906	Acetylglutamate kinase OS=Paracoccidioides lutzii (strain ATCC MYA-826 / Pb01) OX=502779 GN=PAAG_04528 PE=3 SV=2
C1HDG1	1.47497	0.0331287	177	0.000123502	0.000182161	Uncharacterized protein OS=Paracoccidioides lutzii (strain ATCC MYA-826 / Pb01) OX=502779 GN=PAAG_08802 PE=4 SV=1
C1HB04	1.4787	0.0267337	1323	0.000289952	0.000428751	NADH-quinone oxidoreductase subunit I 2 OS=Paracoccidioides lutzii (strain ATCC MYA-826 / Pb01) OX=502779 GN=PAAG_07868 PE=3 SV=1
C1H967	1.47992	0.0144153	1670	0.00026314	0.000389426	Metal resistance protein YCF1 OS=Paracoccidioides lutzii (strain ATCC MYA-826 / Pb01) OX=502779 GN=PAAG_07308 PE=4 SV=1
C1H942	1.48436	0.0106044	1874	0.00042821	0.00063562	ATP-dependent RNA helicase FAL1 OS=Paracoccidioides lutzii (strain ATCC MYA-826 / Pb01) OX=502779 GN=PAAG_07283 PE=3 SV=1
C1H5V7	1.48717	0.115453	2239	9.62597e-05	0.000143154	Peptidylprolyl isomerase domain and WD repeat-containing protein OS=Paracoccidioides lutzii (strain ATCC MYA-826 / Pb01) OX=502779 GN=PAAG_06067 PE=4 SV=1
C1GSY8	1.48898	0.186398	1489	7.04146e-05	0.000104846	Uncharacterized protein OS=Paracoccidioides lutzii (strain ATCC MYA-826 / Pb01) OX=502779 GN=PAAG_01633 PE=4 SV=1
C1H150	1.48914	0.221721	1442	6.87323e-05	0.000102352	Retinol dehydrogenase OS=Paracoccidioides lutzii (strain ATCC MYA-826 / Pb01) OX=502779 GN=PAAG_04494 PE=4 SV=2
C1HDK0	1.49317	0.0358709	2222	0.000104316	0.000155762	Ubiquitin thioesterase OTU1 OS=Paracoccidioides lutzii (strain ATCC MYA-826 / Pb01) OX=502779 GN=PAAG_08841 PE=4 SV=1
C1GPG6	1.49647	0.0788585	1781	0.000138807	0.000207721	1-(5-phosphoribosyl)-5-[(5-phosphoribosylamino)methylideneamino] imidazole-4-carboxamide isomerase OS=Paracoccidioides lutzii (strain ATCC MYA-826 / Pb01) OX=502779 GN=PAAG_00411 PE=3 SV=1
C1GTM9	1.50276	0.0204354	1697	0.000234282	0.000352071	Dolichol-phosphate mannosyltransferase subunit 1 OS=Paracoccidioides lutzii (strain ATCC MYA-826 / Pb01) OX=502779 GN=PAAG_01874 PE=3 SV=1
C1GR01	1.50656	0.01547	755	0.000346606	0.000522182	Lysyl-tRNA synthetase OS=Paracoccidioides lutzii (strain ATCC MYA-826 / Pb01) OX=502779 GN=PAAG_00946 PE=4 SV=2
C1HBJ5	1.50917	0.0337678	2054	6.93382e-05	0.000104643	GPI transamidase component GPI16 OS=Paracoccidioides lutzii (strain ATCC MYA-826 / Pb01) OX=502779 GN=PAAG_08136 PE=4 SV=1
C1H932	1.51377	0.0369409	450	8.55582e-05	0.000129515	DNA helicase OS=Paracoccidioides lutzii (strain ATCC MYA-826 / Pb01) OX=502779 GN=PAAG_07273 PE=3 SV=1
C1GZV8	1.51401	0.0879387	427	0.000111671	0.000169072	Homoserine O-acetyltransferase OS=Paracoccidioides lutzii (strain ATCC MYA-826 / Pb01) OX=502779 GN=PAAG_04052 PE=3 SV=2
C1H7N6	1.51583	0.0613324	1981	0.000223006	0.000338038	Proline dehydrogenase OS=Paracoccidioides lutzii (strain ATCC MYA-826 / Pb01) OX=502779 GN=PAAG_06777 PE=3 SV=1
C1HDH6	1.51862	0.0140686	1024	0.0002489	0.000377985	Translation initiation factor 2 subunit beta OS=Paracoccidioides lutzii (strain ATCC MYA-826 / Pb01) OX=502779 GN=PAAG_08817 PE=4 SV=2
C1HAX0	1.53057	0.110388	1463	0.000136604	0.000209081	Phosphatase OS=Paracoccidioides lutzii (strain ATCC MYA-826 / Pb01) OX=502779 GN=PAAG_07834 PE=4 SV=1
C1HAI4	1.54025	0.0302985	1105	0.000152473	0.000234846	Uncharacterized protein OS=Paracoccidioides lutzii (strain ATCC MYA-826 / Pb01) OX=502779 GN=PAAG_07638 PE=4 SV=1
A0A0A2V618	1.54854	0.0131031	2176	0.000388173	0.000601102	Uncharacterized protein OS=Paracoccidioides lutzii (strain ATCC MYA-826 / Pb01) OX=502779 GN=PAAG_11679 PE=3 SV=1
C1GS95	1.55092	0.00896237	355	0.000277367	0.000430176	Endoplasmic reticulum protein OS=Paracoccidioides lutzii (strain ATCC MYA-826 / Pb01) OX=502779 GN=PAAG_01390 PE=4 SV=1
C1GVR5	1.55166	0.0102452	2016	0.000275654	0.00042772	Uncharacterized protein OS=Paracoccidioides lutzii (strain ATCC MYA-826 / Pb01) OX=502779 GN=PAAG_02610 PE=4 SV=2
C1GVJ3	1.55254	0.0444791	1110	9.31537e-05	0.000144625	Uncharacterized protein OS=Paracoccidioides lutzii (strain ATCC MYA-826 / Pb01) OX=502779 GN=PAAG_02270 PE=4 SV=1
C1GYN3	1.55541	0.060814	397	0.000168188	0.000261601	Aspartyl-tRNA synthetase, mitochondrial OS=Paracoccidioides lutzii (strain ATCC MYA-826 / Pb01) OX=502779 GN=PAAG_03187 PE=3 SV=2
C1GRK6	1.55714	0.0307988	1081	0.000138829	0.000216176	DNA-directed RNA polymerase subunit beta OS=Paracoccidioides lutzii (strain ATCC MYA-826 / Pb01) OX=502779 GN=PAAG_01151 PE=3 SV=2
C1GRI8	1.56122	0.0121305	829	0.000166657	0.000260188	Uncharacterized protein OS=Paracoccidioides lutzii (strain ATCC MYA-826 / Pb01) OX=502779 GN=PAAG_01133 PE=4 SV=1
A0A0A2V746	1.56237	0.0479976	1797	0.000207974	0.000324931	Uncharacterized protein OS=Paracoccidioides lutzii (strain ATCC MYA-826 / Pb01) OX=502779 GN=PAAG_11083 PE=4 SV=1
C1H290	1.57206	0.0123548	1169	0.000122448	0.000192495	Oligosaccharyl transferase subunit OS=Paracoccidioides lutzii (strain ATCC MYA-826 / Pb01) OX=502779 GN=PAAG_04719 PE=4 SV=2
C1H8U4	1.5727	0.0123299	742	0.000290981	0.000457627	Actin-related protein 2/3 complex subunit 5 OS=Paracoccidioides lutzii (strain ATCC MYA-826 / Pb01) OX=502779 GN=PAAG_07185 PE=3 SV=1
A0A0A2UZZ1	1.57348	0.0176539	1368	0.000345548	0.000543711	Glycogen debranching enzyme OS=Paracoccidioides lutzii (strain ATCC MYA-826 / Pb01) OX=502779 GN=PAAG_12154 PE=4 SV=1
C1GRP7	1.57548	0.134451	2235	0.000114102	0.000179766	Pre-60S factor REI1 OS=Paracoccidioides lutzii (strain ATCC MYA-826 / Pb01) OX=502779 GN=PAAG_01192 PE=4 SV=1
C1HA59	1.57581	0.0423784	554	9.20389e-05	0.000145036	Uncharacterized protein OS=Paracoccidioides lutzii (strain ATCC MYA-826 / Pb01) OX=502779 GN=PAAG_07788 PE=4 SV=2
C1H6H4	1.57727	0.0979924	1428	0.000221306	0.000349059	Uncharacterized protein OS=Paracoccidioides lutzii (strain ATCC MYA-826 / Pb01) OX=502779 GN=PAAG_06365 PE=4 SV=2
C1GNY4	1.58209	0.0185498	891	0.000135677	0.000214654	Signal recognition particle subunit SRP68 OS=Paracoccidioides lutzii (strain ATCC MYA-826 / Pb01) OX=502779 GN=PAAG_00229 PE=3 SV=2
C1HD62	1.58418	0.015693	1407	0.00017995	0.000285074	Rheb small monomeric GTPase RhbA OS=Paracoccidioides lutzii (strain ATCC MYA-826 / Pb01) OX=502779 GN=PAAG_08703 PE=4 SV=2
C1H6A1	1.58954	0.0199209	2028	0.000138844	0.000220698	Phosphoribosylaminoimidazole carboxylase OS=Paracoccidioides lutzii (strain ATCC MYA-826 / Pb01) OX=502779 GN=PAAG_06211 PE=3 SV=1
C1H9P3	1.59448	0.0315524	1755	0.000138493	0.000220825	54S ribosomal protein L9 OS=Paracoccidioides lutzii (strain ATCC MYA-826 / Pb01) OX=502779 GN=PAAG_07484 PE=3 SV=1
C1GUU5	1.60337	0.0266795	1409	0.000250165	0.000401106	Porphobilinogen deaminase OS=Paracoccidioides lutzii (strain ATCC MYA-826 / Pb01) OX=502779 GN=PAAG_02418 PE=4 SV=2
A0A0A2VML4	1.61051	0.0534685	642	0.000113243	0.000182379	Uncharacterized protein OS=Paracoccidioides lutzii (strain ATCC MYA-826 / Pb01) OX=502779 GN=PAAG_11028 PE=4 SV=1
C1GSV4	1.61301	0.0479348	1717	0.000137116	0.000221169	Uncharacterized protein OS=Paracoccidioides lutzii (strain ATCC MYA-826 / Pb01) OX=502779 GN=PAAG_01599 PE=4 SV=2
C1GU27	1.62022	0.0221361	1440	0.00015229	0.000246743	Uncharacterized protein OS=Paracoccidioides lutzii (strain ATCC MYA-826 / Pb01) OX=502779 GN=PAAG_02022 PE=4 SV=1
C1GSP6	1.63113	0.0379734	1974	0.000249025	0.000406191	Uncharacterized protein OS=Paracoccidioides lutzii (strain ATCC MYA-826 / Pb01) OX=502779 GN=PAAG_01541 PE=4 SV=2
C1GQW9	1.63136	0.016189	431	0.000103412	0.000168702	Geranylgeranyl transferase type I beta subunit OS=Paracoccidioides lutzii (strain ATCC MYA-826 / Pb01) OX=502779 GN=PAAG_00914 PE=4 SV=2
C1GNE8	1.63699	0.040457	2209	0.000220584	0.000361094	Ribose-phosphate pyrophosphokinase OS=Paracoccidioides lutzii (strain ATCC MYA-826 / Pb01) OX=502779 GN=PAAG_00043 PE=4 SV=2
C1HAD2	1.63737	0.0188516	453	0.000110933	0.000181639	Cytochrome b2 OS=Paracoccidioides lutzii (strain ATCC MYA-826 / Pb01) OX=502779 GN=PAAG_07586 PE=3 SV=1
A0A0A2V2X0	1.64664	0.178139	861	0.000137213	0.000225939	DNA helicase OS=Paracoccidioides lutzii (strain ATCC MYA-826 / Pb01) OX=502779 GN=PAAG_11072 PE=3 SV=1
C1GTX7	1.64861	0.0813618	194	9.71513e-05	0.000160164	Uncharacterized protein OS=Paracoccidioides lutzii (strain ATCC MYA-826 / Pb01) OX=502779 GN=PAAG_01972 PE=4 SV=2
A0A0A2V5B9	1.65597	0.0682358	379	0.000125216	0.000207354	3-hydroxyanthranilate 3,4-dioxygenase OS=Paracoccidioides lutzii (strain ATCC MYA-826 / Pb01) OX=502779 GN=BNA1 PE=3 SV=1
C1H1R7	1.66653	0.0123339	2244	0.000233849	0.000389718	Uncharacterized protein OS=Paracoccidioides lutzii (strain ATCC MYA-826 / Pb01) OX=502779 GN=PAAG_04853 PE=4 SV=2
C1GZS2	1.67512	0.0167821	158	0.000139673	0.000233968	Glutamate-cysteine ligase OS=Paracoccidioides lutzii (strain ATCC MYA-826 / Pb01) OX=502779 GN=PAAG_04016 PE=4 SV=2
C1HC29	1.68218	0.0674957	2014	0.000153851	0.000258804	Quinone oxidoreductase OS=Paracoccidioides lutzii (strain ATCC MYA-826 / Pb01) OX=502779 GN=PAAG_08320 PE=4 SV=2
C1GTQ7	1.68284	0.013524	2248	0.000155264	0.000261283	Electron transfer flavoprotein-ubiquinone oxidoreductase OS=Paracoccidioides lutzii (strain ATCC MYA-826 / Pb01) OX=502779 GN=PAAG_01902 PE=4 SV=1
C1GS76	1.68306	0.0147139	1170	0.00013933	0.000234502	Glucosamine-6-phosphate isomerase OS=Paracoccidioides lutzii (strain ATCC MYA-826 / Pb01) OX=502779 GN=PAAG_01371 PE=3 SV=2
C1GXS1	1.68748	0.0340358	386	0.000138454	0.000233638	Mitochondrial import receptor subunit tom-40 OS=Paracoccidioides lutzii (strain ATCC MYA-826 / Pb01) OX=502779 GN=PAAG_03644 PE=4 SV=1
C1HDC8	1.69071	0.0157162	1379	0.000276837	0.000468052	ATP-dependent DNA helicase 2 subunit 1 OS=Paracoccidioides lutzii (strain ATCC MYA-826 / Pb01) OX=502779 GN=PAAG_08769 PE=4 SV=2
C1GR99	1.70589	0.0426468	1897	0.000236398	0.000403271	NADH-ubiquinone oxidoreductase 24 kDa subunit OS=Paracoccidioides lutzii (strain ATCC MYA-826 / Pb01) OX=502779 GN=PAAG_01044 PE=4 SV=1
C1GTP8	1.71009	0.017086	1751	0.000166642	0.000284974	TTL domain-containing protein OS=Paracoccidioides lutzii (strain ATCC MYA-826 / Pb01) OX=502779 GN=PAAG_01893 PE=4 SV=2
C1H9K0	1.72014	0.0453815	172	0.000103289	0.000177672	Exosome complex exonuclease RRP40 OS=Paracoccidioides lutzii (strain ATCC MYA-826 / Pb01) OX=502779 GN=PAAG_07441 PE=4 SV=1
C1HAT7	1.72642	0.246444	1012	0.000114753	0.000198112	Uncharacterized protein OS=Paracoccidioides lutzii (strain ATCC MYA-826 / Pb01) OX=502779 GN=PAAG_07916 PE=4 SV=1
C1HA86	1.7522	0.0283967	1204	9.25942e-05	0.000162243	Asparagine-rich protein OS=Paracoccidioides lutzii (strain ATCC MYA-826 / Pb01) OX=502779 GN=PAAG_07815 PE=4 SV=1
A0A0A2VIK9	1.75682	0.110269	1435	0.000182471	0.000320569	Uncharacterized protein OS=Paracoccidioides lutzii (strain ATCC MYA-826 / Pb01) OX=502779 GN=PAAG_12593 PE=4 SV=1
C1H5D9	1.75813	0.0163689	849	0.000110695	0.000194616	Ubiquitin-conjugating enzyme OS=Paracoccidioides lutzii (strain ATCC MYA-826 / Pb01) OX=502779 GN=PAAG_05980 PE=3 SV=2
C1H0E5	1.7586	0.0337344	1716	0.000125216	0.000220205	Uncharacterized protein OS=Paracoccidioides lutzii (strain ATCC MYA-826 / Pb01) OX=502779 GN=PAAG_04239 PE=4 SV=1
C1H5C8	1.76935	0.0105953	846	0.000124324	0.000219973	Uncharacterized protein OS=Paracoccidioides lutzii (strain ATCC MYA-826 / Pb01) OX=502779 GN=PAAG_05969 PE=4 SV=2
C1HCP8	1.77113	0.0131011	1718	0.000124409	0.000220343	Uncharacterized protein OS=Paracoccidioides lutzii (strain ATCC MYA-826 / Pb01) OX=502779 GN=PAAG_08539 PE=3 SV=1
C1H4P1	1.78853	0.0922493	443	0.000136998	0.000245024	DNA-directed RNA polymerases I and III subunit RPAC1 OS=Paracoccidioides lutzii (strain ATCC MYA-826 / Pb01) OX=502779 GN=PAAG_05734 PE=4 SV=1
C1H6K9	1.79681	0.0168438	377	0.000173171	0.000311157	Pre-mRNA-processing factor 17 OS=Paracoccidioides lutzii (strain ATCC MYA-826 / Pb01) OX=502779 GN=PAAG_06400 PE=4 SV=1
A0A0A2VM29	1.81161	0.0116071	850	0.000193008	0.000349656	Uncharacterized protein OS=Paracoccidioides lutzii (strain ATCC MYA-826 / Pb01) OX=502779 GN=PAAG_11315 PE=4 SV=1
C1H6X0	1.86514	0.0158368	358	0.000222101	0.000414249	Mitochondrial genome maintenance protein mgm101 OS=Paracoccidioides lutzii (strain ATCC MYA-826 / Pb01) OX=502779 GN=PAAG_06511 PE=4 SV=1
A0A0A2V336	1.87492	0.0187776	1767	0.000186307	0.000349312	Uncharacterized protein OS=Paracoccidioides lutzii (strain ATCC MYA-826 / Pb01) OX=502779 GN=PAAG_12542 PE=3 SV=1
C1GPU0	1.89134	0.0470606	1711	0.000170349	0.000322187	Mitogen-activated protein kinase OS=Paracoccidioides lutzii (strain ATCC MYA-826 / Pb01) OX=502779 GN=PAAG_00535 PE=3 SV=2
A0A0A2VLS2	1.89713	0.0268677	1161	0.000248313	0.000471084	AP-1 complex subunit gamma OS=Paracoccidioides lutzii (strain ATCC MYA-826 / Pb01) OX=502779 GN=PAAG_11376 PE=3 SV=1
C1H196	1.94133	0.0746516	2342	9.14794e-05	0.000177592	Mitochondrial pyruvate carrier OS=Paracoccidioides lutzii (strain ATCC MYA-826 / Pb01) OX=502779 GN=PAAG_04540 PE=3 SV=1
C1GUT0	2.04178	0.0927951	105	0.000140388	0.000286642	Pre-mRNA-splicing factor ATP-dependent RNA helicase PRP43 OS=Paracoccidioides lutzii (strain ATCC MYA-826 / Pb01) OX=502779 GN=PAAG_02403 PE=4 SV=1
C1GRI7	2.11468	0.0171802	2086	0.000153837	0.000325316	E3 ubiquitin-protein ligase OS=Paracoccidioides lutzii (strain ATCC MYA-826 / Pb01) OX=502779 GN=PAAG_01132 PE=3 SV=1
C1H8P0	2.15431	0.00857057	2358	0.000115425	0.000248661	Arginine N-methyltransferase OS=Paracoccidioides lutzii (strain ATCC MYA-826 / Pb01) OX=502779 GN=PAAG_07131 PE=3 SV=2
C1GP93	2.40633	0.0197068	2056	9.73043e-05	0.000234147	Methionyl-tRNA synthetase OS=Paracoccidioides lutzii (strain ATCC MYA-826 / Pb01) OX=502779 GN=PAAG_00338 PE=3 SV=1
contaminant_KERATIN13	3.29957	0.0730386	867	0.000153057	0.000505022
contaminant_KERATIN03	5.1205	0.16556	2170	0.000138392	0.000708637	; Additional IDs concatenated into MaxParsimony group: contaminant_KERATIN10, contaminant_KERATIN04, contaminant_KERATIN09

## Sheet: Red
Protein id	Fold Change	pValue	GPI (Index in the sparse matrix)	Signal(Bottom)	Signal(Top)	Description
C1H9U3	-1.337	0.173114	862	0.000223685	0.000167303	Chaperone protein dnaJ 3 OS=Paracoccidioides lutzii (strain ATCC MYA-826 / Pb01) OX=502779 GN=PAAG_07534 PE=4 SV=1
C1GZC2	-1.33346	0.148228	231	0.000104335	7.82436e-05	Uncharacterized protein OS=Paracoccidioides lutzii (strain ATCC MYA-826 / Pb01) OX=502779 GN=PAAG_03866 PE=4 SV=2
C1GP11	-1.33255	0.200798	1805	0.000139712	0.000104846	Uncharacterized protein OS=Paracoccidioides lutzii (strain ATCC MYA-826 / Pb01) OX=502779 GN=PAAG_00256 PE=4 SV=1
C1HBH7	-1.32674	0.127384	2344	0.000188326	0.000141947	Uncharacterized protein OS=Paracoccidioides lutzii (strain ATCC MYA-826 / Pb01) OX=502779 GN=PAAG_08118 PE=4 SV=2
C1H269	-1.32437	0.16669	1678	0.000205815	0.000155406	Uncharacterized protein OS=Paracoccidioides lutzii (strain ATCC MYA-826 / Pb01) OX=502779 GN=PAAG_04698 PE=4 SV=2
C1GXP8	-1.32325	0.168399	2198	0.000206399	0.000155979	Uncharacterized protein OS=Paracoccidioides lutzii (strain ATCC MYA-826 / Pb01) OX=502779 GN=PAAG_03622 PE=4 SV=1
C1H0I3	-1.31746	0.103303	1411	0.000171536	0.000130203	Transcription initiation factor TFIID subunit 6 OS=Paracoccidioides lutzii (strain ATCC MYA-826 / Pb01) OX=502779 GN=PAAG_04277 PE=4 SV=1
C1GRF0	-1.30253	0.0823778	1389	0.000235981	0.000181171	Proline iminopeptidase OS=Paracoccidioides lutzii (strain ATCC MYA-826 / Pb01) OX=502779 GN=PAAG_01095 PE=4 SV=2
C1GUE0	-1.30164	0.0670086	2187	0.000235089	0.00018061	Prefoldin subunit 4 OS=Paracoccidioides lutzii (strain ATCC MYA-826 / Pb01) OX=502779 GN=PAAG_02135 PE=3 SV=1
C1GXJ9	-1.29944	0.235769	1757	0.000171727	0.000132155	Vacuolar protein sorting-associated protein OS=Paracoccidioides lutzii (strain ATCC MYA-826 / Pb01) OX=502779 GN=PAAG_03573 PE=3 SV=1
C1HBS4	-1.29917	0.105489	1031	0.000456273	0.000351204	Uncharacterized protein OS=Paracoccidioides lutzii (strain ATCC MYA-826 / Pb01) OX=502779 GN=PAAG_08215 PE=4 SV=2
C1GYA1	-1.2989	0.0941758	503	0.000137907	0.000106172	WD repeat-containing protein OS=Paracoccidioides lutzii (strain ATCC MYA-826 / Pb01) OX=502779 GN=PAAG_03055 PE=4 SV=2
C1HCB7	-1.29541	0.14723	2221	8.36208e-05	6.45518e-05	Uncharacterized protein OS=Paracoccidioides lutzii (strain ATCC MYA-826 / Pb01) OX=502779 GN=PAAG_08408 PE=4 SV=1
C1GS53	-1.2933	0.113624	1978	0.000387507	0.000299627	Uncharacterized protein OS=Paracoccidioides lutzii (strain ATCC MYA-826 / Pb01) OX=502779 GN=PAAG_01348 PE=4 SV=2
C1H9G7	-1.29193	0.120566	1888	0.000319002	0.000246919	Vacuolar protein sorting-associated protein OS=Paracoccidioides lutzii (strain ATCC MYA-826 / Pb01) OX=502779 GN=PAAG_07408 PE=3 SV=1
C1H0U7	-1.29031	0.100306	1876	0.000470386	0.000364552	Progesterone binding protein OS=Paracoccidioides lutzii (strain ATCC MYA-826 / Pb01) OX=502779 GN=PAAG_04391 PE=3 SV=1
C1HD39	-1.2903	0.0649666	152	0.000235911	0.000182834	RNA binding domain-containing protein OS=Paracoccidioides lutzii (strain ATCC MYA-826 / Pb01) OX=502779 GN=PAAG_08680 PE=4 SV=2
C1H8H5	-1.28886	0.204461	454	0.000167812	0.000130203	UDP-N-acetylglucosamine transferase subunit ALG13 OS=Paracoccidioides lutzii (strain ATCC MYA-826 / Pb01) OX=502779 GN=ALG13 PE=3 SV=1
C1GWD3	-1.28663	0.0696493	2263	0.000403222	0.000313395	Uncharacterized protein OS=Paracoccidioides lutzii (strain ATCC MYA-826 / Pb01) OX=502779 GN=PAAG_02828 PE=4 SV=1
C1H4H0	-1.28587	0.0659018	1554	0.000904348	0.000703298	Arp2/3 complex 34 kDa subunit OS=Paracoccidioides lutzii (strain ATCC MYA-826 / Pb01) OX=502779 GN=PAAG_05663 PE=3 SV=1
C1H4Q2	-1.28447	0.123833	2213	8.36208e-05	6.51013e-05	Uncharacterized protein OS=Paracoccidioides lutzii (strain ATCC MYA-826 / Pb01) OX=502779 GN=PAAG_05742 PE=4 SV=1
C1HC61	-1.2844	0.249766	2007	0.00015236	0.000118623	Uncharacterized protein OS=Paracoccidioides lutzii (strain ATCC MYA-826 / Pb01) OX=502779 GN=PAAG_08352 PE=4 SV=2
C1GT61	-1.28208	0.181346	1127	0.000249274	0.000194428	26S proteasome regulatory subunit RPN10 OS=Paracoccidioides lutzii (strain ATCC MYA-826 / Pb01) OX=502779 GN=PAAG_01706 PE=4 SV=1
C1H530	-1.27926	0.143012	1636	0.00048172	0.000376561	Cytoskeleton assembly control protein Sla2 OS=Paracoccidioides lutzii (strain ATCC MYA-826 / Pb01) OX=502779 GN=PAAG_05871 PE=4 SV=2
C1H388	-1.27443	0.109455	166	8.29668e-05	6.51013e-05	Uncharacterized protein OS=Paracoccidioides lutzii (strain ATCC MYA-826 / Pb01) OX=502779 GN=PAAG_05231 PE=4 SV=1
C1GXF9	-1.27373	0.0327603	406	0.000263724	0.000207048	Hsp70 nucleotide exchange factor fes1 OS=Paracoccidioides lutzii (strain ATCC MYA-826 / Pb01) OX=502779 GN=PAAG_03533 PE=4 SV=2
C1H1S7	-1.27329	0.119915	242	0.000166642	0.000130876	Uncharacterized protein OS=Paracoccidioides lutzii (strain ATCC MYA-826 / Pb01) OX=502779 GN=PAAG_04863 PE=4 SV=2
A0A0A2VJK5	-1.27294	0.0837318	791	0.000431759	0.000339183	Eukaryotic translation initiation factor 3 subunit M OS=Paracoccidioides lutzii (strain ATCC MYA-826 / Pb01) OX=502779 GN=PAAG_12263 PE=3 SV=1
C1GWL0	-1.27273	0.0678999	1343	0.000331684	0.000260608	V-type proton ATPase subunit H OS=Paracoccidioides lutzii (strain ATCC MYA-826 / Pb01) OX=502779 GN=PAAG_02905 PE=3 SV=2
C1H145	-1.27236	0.116902	1385	0.000166588	0.000130928	Acyl-protein thioesterase OS=Paracoccidioides lutzii (strain ATCC MYA-826 / Pb01) OX=502779 GN=PAAG_04489 PE=4 SV=1
C1H3Q8	-1.27158	0.0992776	577	0.000184426	0.000145036	Nuclear elongation and deformation protein OS=Paracoccidioides lutzii (strain ATCC MYA-826 / Pb01) OX=502779 GN=PAAG_05401 PE=4 SV=2
C1H5Q8	-1.2633	0.208138	1430	0.000115192	9.11834e-05	Mitochondrial dicarboxylate transporter OS=Paracoccidioides lutzii (strain ATCC MYA-826 / Pb01) OX=502779 GN=PAAG_06253 PE=3 SV=1
C1H5I7	-1.26065	0.0488136	2069	0.000162754	0.000129104	Uncharacterized protein OS=Paracoccidioides lutzii (strain ATCC MYA-826 / Pb01) OX=502779 GN=PAAG_06028 PE=4 SV=2
C1H3E8	-1.26027	0.159674	1657	0.000262818	0.000208541	Enoyl-CoA hydratase/isomerase family protein OS=Paracoccidioides lutzii (strain ATCC MYA-826 / Pb01) OX=502779 GN=PAAG_05291 PE=4 SV=1
C1H628	-1.25943	0.16634	1358	0.000375855	0.000298434	Uncharacterized protein OS=Paracoccidioides lutzii (strain ATCC MYA-826 / Pb01) OX=502779 GN=PAAG_06138 PE=4 SV=1
C1HC74	-1.25524	0.0447048	402	0.000373696	0.000297708	26S proteasome non-ATPase regulatory subunit 8 OS=Paracoccidioides lutzii (strain ATCC MYA-826 / Pb01) OX=502779 GN=PAAG_08365 PE=4 SV=1
C1GV49	-1.25082	0.0447806	843	0.000194386	0.000155406	U6 snRNA-associated Sm-like protein LSm3 OS=Paracoccidioides lutzii (strain ATCC MYA-826 / Pb01) OX=502779 GN=LSM3 PE=3 SV=1
C1GUL0	-1.24953	0.185514	211	0.000121333	9.71036e-05	GMP synthase OS=Paracoccidioides lutzii (strain ATCC MYA-826 / Pb01) OX=502779 GN=PAAG_02333 PE=4 SV=1
C1HAA1	-1.24928	0.195925	413	9.73043e-05	7.78882e-05	Uncharacterized protein OS=Paracoccidioides lutzii (strain ATCC MYA-826 / Pb01) OX=502779 GN=PAAG_07830 PE=4 SV=1
C1GQF9	-1.2491	0.287342	851	0.000138442	0.000110833	Ribosomal RNA-processing protein OS=Paracoccidioides lutzii (strain ATCC MYA-826 / Pb01) OX=502779 GN=PAAG_00754 PE=4 SV=1
C1H2A0	-1.24721	0.224722	1145	0.000181747	0.000145723	Uncharacterized protein OS=Paracoccidioides lutzii (strain ATCC MYA-826 / Pb01) OX=502779 GN=PAAG_04729 PE=4 SV=2
C1H411	-1.24448	0.207962	650	0.000122448	9.83925e-05	Uncharacterized protein OS=Paracoccidioides lutzii (strain ATCC MYA-826 / Pb01) OX=502779 GN=PAAG_05504 PE=4 SV=1
C1H839	-1.24396	0.0533536	1882	0.000485268	0.000390099	Citrate lyase subunit beta OS=Paracoccidioides lutzii (strain ATCC MYA-826 / Pb01) OX=502779 GN=PAAG_07016 PE=4 SV=1
C1GXF3	-1.24254	0.0609356	2312	0.000501028	0.00040323	Imidazoleglycerol-phosphate dehydratase OS=Paracoccidioides lutzii (strain ATCC MYA-826 / Pb01) OX=502779 GN=PAAG_03527 PE=3 SV=1
C1GTE2	-1.24227	0.0928263	1574	0.000579426	0.000466425	Protein phosphatase PP2A regulatory subunit A OS=Paracoccidioides lutzii (strain ATCC MYA-826 / Pb01) OX=502779 GN=PAAG_01787 PE=4 SV=1
C1HB69	-1.23863	0.224163	138	0.000208723	0.000168511	Mitochondrial carrier protein OS=Paracoccidioides lutzii (strain ATCC MYA-826 / Pb01) OX=502779 GN=PAAG_08010 PE=3 SV=1
C1GXG0	-1.23769	0.213054	226	9.72346e-05	7.85611e-05	Uncharacterized protein OS=Paracoccidioides lutzii (strain ATCC MYA-826 / Pb01) OX=502779 GN=PAAG_03534 PE=4 SV=1
C1H0H2	-1.23577	0.104589	2003	0.000140829	0.000113961	Alpha-methylacyl-CoA racemase OS=Paracoccidioides lutzii (strain ATCC MYA-826 / Pb01) OX=502779 GN=PAAG_04266 PE=4 SV=1
C1H8U1	-1.23385	0.0261988	344	0.000802418	0.000650337	40S ribosomal protein S7 OS=Paracoccidioides lutzii (strain ATCC MYA-826 / Pb01) OX=502779 GN=PAAG_07182 PE=3 SV=2
C1H5X3	-1.23324	0.0390341	1014	0.000626328	0.00050787	Dienelactone hydrolase family protein OS=Paracoccidioides lutzii (strain ATCC MYA-826 / Pb01) OX=502779 GN=PAAG_06083 PE=4 SV=1
C1H5I0	-1.232	0.246589	2238	0.000306097	0.000248456	Transcription elongation factor Spt6 OS=Paracoccidioides lutzii (strain ATCC MYA-826 / Pb01) OX=502779 GN=PAAG_06021 PE=3 SV=2
C1H843	-1.23065	0.0133044	311	0.000943309	0.00076651	Thioredoxin reductase OS=Paracoccidioides lutzii (strain ATCC MYA-826 / Pb01) OX=502779 GN=PAAG_07020 PE=3 SV=1
C1GRG6	-1.22837	0.232077	2178	0.000222297	0.000180968	MICOS complex subunit OS=Paracoccidioides lutzii (strain ATCC MYA-826 / Pb01) OX=502779 GN=PAAG_01111 PE=4 SV=1
C1GZM6	-1.22714	0.0948087	202	0.000207847	0.000169375	Replication factor-A protein OS=Paracoccidioides lutzii (strain ATCC MYA-826 / Pb01) OX=502779 GN=PAAG_03970 PE=4 SV=2
C1GT88	-1.22532	0.044604	1637	0.000652999	0.000532921	28 kDa ribonucleoprotein OS=Paracoccidioides lutzii (strain ATCC MYA-826 / Pb01) OX=502779 GN=PAAG_01733 PE=4 SV=2
C1GYI4	-1.22487	0.0495975	981	0.000861249	0.000703134	Alanine-glyoxylate aminotransferase OS=Paracoccidioides lutzii (strain ATCC MYA-826 / Pb01) OX=502779 GN=PAAG_03138 PE=3 SV=2
C1GPF9	-1.22469	0.08853	489	0.000158112	0.000129104	Sodium/hydrogen exchanger OS=Paracoccidioides lutzii (strain ATCC MYA-826 / Pb01) OX=502779 GN=PAAG_00404 PE=3 SV=2
C1GYD8	-1.22229	0.0126562	1917	0.00167362	0.00136925	Uncharacterized protein OS=Paracoccidioides lutzii (strain ATCC MYA-826 / Pb01) OX=502779 GN=PAAG_03092 PE=4 SV=1
C1H728	-1.2221	0.00929573	1631	0.000430312	0.000352109	60S ribosomal protein L43 OS=Paracoccidioides lutzii (strain ATCC MYA-826 / Pb01) OX=502779 GN=PAAG_06569 PE=4 SV=2
C1GPW2	-1.21978	0.0347058	49	0.000996011	0.000816548	Mannose-6-phosphate isomerase OS=Paracoccidioides lutzii (strain ATCC MYA-826 / Pb01) OX=502779 GN=PAAG_00557 PE=3 SV=2
C1HE51	-1.2188	0.273665	1370	0.000110948	9.10305e-05	Uncharacterized protein OS=Paracoccidioides lutzii (strain ATCC MYA-826 / Pb01) OX=502779 GN=PAAG_09044 PE=3 SV=2
A0A0A2V091	-1.21806	0.103291	639	0.000207193	0.0001701	Uncharacterized protein OS=Paracoccidioides lutzii (strain ATCC MYA-826 / Pb01) OX=502779 GN=PAAG_12131 PE=3 SV=1
C1GUL4	-1.21713	0.277716	825	0.000158242	0.000130012	DNA-directed RNA polymerases I, II, and III subunit RPABC3 OS=Paracoccidioides lutzii (strain ATCC MYA-826 / Pb01) OX=502779 GN=PAAG_02337 PE=3 SV=1
C1GZP9	-1.2147	0.210451	192	0.000221072	0.000181997	DNA helicase OS=Paracoccidioides lutzii (strain ATCC MYA-826 / Pb01) OX=502779 GN=PAAG_03993 PE=3 SV=2
C1H2Z9	-1.21268	0.0257296	320	0.000790854	0.000652156	10 kDa heat shock protein, mitochondrial OS=Paracoccidioides lutzii (strain ATCC MYA-826 / Pb01) OX=502779 GN=PAAG_05142 PE=3 SV=1
C1GXW0	-1.21197	0.0236743	27	0.00138867	0.0011458	Glucose-6-phosphate 1-epimerase OS=Paracoccidioides lutzii (strain ATCC MYA-826 / Pb01) OX=502779 GN=PAAG_03243 PE=3 SV=1
C1HBK4	-1.21081	0.282435	1125	0.000124993	0.00010323	NAD dependent epimerase/dehydratase family protein OS=Paracoccidioides lutzii (strain ATCC MYA-826 / Pb01) OX=502779 GN=PAAG_08145 PE=4 SV=1
C1GVT0	-1.21053	0.025508	357	0.000583424	0.000481956	Vesicle transport v-SNARE protein vti1 OS=Paracoccidioides lutzii (strain ATCC MYA-826 / Pb01) OX=502779 GN=PAAG_02625 PE=4 SV=2
C1HDZ3	-1.21023	0.0296276	1304	0.000693813	0.000573289	Cystathionine beta-synthase OS=Paracoccidioides lutzii (strain ATCC MYA-826 / Pb01) OX=502779 GN=PAAG_08986 PE=3 SV=2
C1GQE8	-1.21015	0.0409213	1262	0.00106893	0.000883305	Zinc metalloprotease OS=Paracoccidioides lutzii (strain ATCC MYA-826 / Pb01) OX=502779 GN=PAAG_00743 PE=4 SV=1
C1HAA9	-1.20994	0.144197	1644	0.000471783	0.000389923	Asparagine synthetase OS=Paracoccidioides lutzii (strain ATCC MYA-826 / Pb01) OX=502779 GN=PAAG_07563 PE=4 SV=2
C1GY21	-1.20948	0.129916	1353	0.000487469	0.000403039	2,4-dihydroxyhept-2-ene-1,7-dioic acid aldolase OS=Paracoccidioides lutzii (strain ATCC MYA-826 / Pb01) OX=502779 GN=PAAG_02975 PE=4 SV=1
C1H2W7	-1.20882	0.206462	2012	0.00023658	0.000195712	Exosome complex exonuclease RRP45 OS=Paracoccidioides lutzii (strain ATCC MYA-826 / Pb01) OX=502779 GN=PAAG_05110 PE=4 SV=1
C1H976	-1.20861	0.2616	1066	0.000237289	0.000196332	PENR2 protein OS=Paracoccidioides lutzii (strain ATCC MYA-826 / Pb01) OX=502779 GN=PAAG_07317 PE=4 SV=1
C1GNX6	-1.20849	0.0211576	719	0.00119389	0.000987922	Acetolactate synthase OS=Paracoccidioides lutzii (strain ATCC MYA-826 / Pb01) OX=502779 GN=PAAG_00221 PE=3 SV=2
C1H6X2	-1.20804	0.0861826	153	0.000359581	0.000297656	Biotin-protein ligase ligase OS=Paracoccidioides lutzii (strain ATCC MYA-826 / Pb01) OX=502779 GN=PAAG_06513 PE=4 SV=2
C1GR41	-1.20764	0.0163647	1912	0.00224107	0.00185575	Protein disulfide-isomerase OS=Paracoccidioides lutzii (strain ATCC MYA-826 / Pb01) OX=502779 GN=PAAG_00986 PE=3 SV=1
C1HAL5	-1.20695	0.150664	392	0.0003474	0.000287833	Mannan polymerase II complex ANP1 subunit OS=Paracoccidioides lutzii (strain ATCC MYA-826 / Pb01) OX=502779 GN=PAAG_07669 PE=4 SV=2
C1GPR5	-1.20686	0.16307	1992	0.000472406	0.000391433	Geranylgeranyl pyrophosphate synthetase OS=Paracoccidioides lutzii (strain ATCC MYA-826 / Pb01) OX=502779 GN=PAAG_00510 PE=3 SV=1
C1GRP9	-1.20486	0.124275	2330	0.000483584	0.000401361	2-oxoisovalerate dehydrogenase subunit beta OS=Paracoccidioides lutzii (strain ATCC MYA-826 / Pb01) OX=502779 GN=PAAG_01194 PE=4 SV=2
C1GW74	-1.20436	0.00621725	60	0.000956299	0.000794028	Dihydrolipoamide acetyltransferase component of pyruvate dehydrogenase complex OS=Paracoccidioides lutzii (strain ATCC MYA-826 / Pb01) OX=502779 GN=PAAG_02769 PE=3 SV=1
C1H8V1	-1.20397	0.0433595	1949	0.000750499	0.000623353	Microtubule-associated protein RP/EB family member 3 OS=Paracoccidioides lutzii (strain ATCC MYA-826 / Pb01) OX=502779 GN=PAAG_07192 PE=4 SV=2
C1GRK5	-1.20376	0.0139805	740	0.000721947	0.000599741	Proteasome subunit beta OS=Paracoccidioides lutzii (strain ATCC MYA-826 / Pb01) OX=502779 GN=PAAG_01150 PE=3 SV=1
C1H0A3	-1.20347	0.174208	1362	0.000235272	0.000195495	Uncharacterized protein OS=Paracoccidioides lutzii (strain ATCC MYA-826 / Pb01) OX=502779 GN=PAAG_04197 PE=4 SV=1
C1GTX1	-1.20067	0.103493	1672	0.000194554	0.000162038	Uncharacterized protein OS=Paracoccidioides lutzii (strain ATCC MYA-826 / Pb01) OX=502779 GN=PAAG_01966 PE=3 SV=1
C1HBR2	-1.20043	0.0115315	940	0.00150036	0.00124985	Phosphoenolpyruvate carboxykinase OS=Paracoccidioides lutzii (strain ATCC MYA-826 / Pb01) OX=502779 GN=PAAG_08203 PE=3 SV=2
C1GYX5	-1.20019	0.00828128	28	0.0017481	0.00145652	Thimet oligopeptidase OS=Paracoccidioides lutzii (strain ATCC MYA-826 / Pb01) OX=502779 GN=PAAG_03719 PE=3 SV=2
C1GXR3	-1.20016	0.190353	1183	0.00019447	0.000162038	DUF410 domain-containing protein OS=Paracoccidioides lutzii (strain ATCC MYA-826 / Pb01) OX=502779 GN=PAAG_03636 PE=4 SV=1
C1H3P3	-1.19874	0.291489	2077	0.00010348	8.63238e-05	Uncharacterized protein OS=Paracoccidioides lutzii (strain ATCC MYA-826 / Pb01) OX=502779 GN=PAAG_05386 PE=4 SV=1
C1H134	-1.19717	0.0138729	1294	0.000637755	0.000532719	Dienelactone hydrolase family protein OS=Paracoccidioides lutzii (strain ATCC MYA-826 / Pb01) OX=502779 GN=PAAG_04478 PE=4 SV=2
C1GZL6	-1.19392	0.0534526	326	0.000793068	0.000664256	Isopentenyl-diphosphate Delta-isomerase OS=Paracoccidioides lutzii (strain ATCC MYA-826 / Pb01) OX=502779 GN=PAAG_03960 PE=4 SV=1
C1HDJ3	-1.19368	0.212787	1423	0.000171291	0.000143498	Tricarboxylate transport protein OS=Paracoccidioides lutzii (strain ATCC MYA-826 / Pb01) OX=502779 GN=PAAG_08834 PE=3 SV=1
C1GVZ1	-1.19318	0.0684834	1279	0.00113617	0.000952217	Hsp90 co-chaperone AHA1 OS=Paracoccidioides lutzii (strain ATCC MYA-826 / Pb01) OX=502779 GN=PAAG_02686 PE=4 SV=2
C1H722	-1.19274	0.243642	2225	0.000276378	0.000231717	Succinate/fumarate mitochondrial transporter OS=Paracoccidioides lutzii (strain ATCC MYA-826 / Pb01) OX=502779 GN=PAAG_06563 PE=3 SV=1
C1H5Y6	-1.19226	0.0865961	1016	0.00063681	0.00053412	Phospho-2-dehydro-3-deoxyheptonate aldolase OS=Paracoccidioides lutzii (strain ATCC MYA-826 / Pb01) OX=502779 GN=PAAG_06096 PE=3 SV=1
C1H3Z1	-1.19205	0.0252071	1605	0.00119469	0.00100222	40S ribosomal protein S5 OS=Paracoccidioides lutzii (strain ATCC MYA-826 / Pb01) OX=502779 GN=PAAG_05484 PE=3 SV=1
C1H6I9	-1.19116	0.0038324	945	0.0034762	0.00291832	Pyruvate kinase OS=Paracoccidioides lutzii (strain ATCC MYA-826 / Pb01) OX=502779 GN=PAAG_06380 PE=3 SV=1
C1HDI4	-1.18996	0.0314002	1369	0.000263	0.000221016	Uncharacterized protein OS=Paracoccidioides lutzii (strain ATCC MYA-826 / Pb01) OX=502779 GN=PAAG_08825 PE=4 SV=2
C1GUG0	-1.18991	0.17032	486	0.000155579	0.000130748	Peroxisomal targeting signal 2 receptor OS=Paracoccidioides lutzii (strain ATCC MYA-826 / Pb01) OX=502779 GN=PAAG_02155 PE=4 SV=1
C1HDP7	-1.18976	0.0890655	218	0.000139274	0.00011706	Nitrogen metabolic regulation protein OS=Paracoccidioides lutzii (strain ATCC MYA-826 / Pb01) OX=502779 GN=PAAG_08904 PE=4 SV=1
C1GWA6	-1.18886	0.354219	251	0.000183846	0.00015464	tRNA ligase OS=Paracoccidioides lutzii (strain ATCC MYA-826 / Pb01) OX=502779 GN=PAAG_02801 PE=3 SV=1
C1GXW4	-1.18807	0.211598	2084	0.000294069	0.000247518	DUF757 domain-containing protein OS=Paracoccidioides lutzii (strain ATCC MYA-826 / Pb01) OX=502779 GN=PAAG_03247 PE=4 SV=2
A0A0A2V0Q9	-1.1869	0.179023	2195	0.000174144	0.000146722	Uncharacterized protein OS=Paracoccidioides lutzii (strain ATCC MYA-826 / Pb01) OX=502779 GN=PAAG_12215 PE=4 SV=1
C1GW80	-1.18621	0.0645215	209	0.000138676	0.000116907	Uncharacterized protein OS=Paracoccidioides lutzii (strain ATCC MYA-826 / Pb01) OX=502779 GN=PAAG_02775 PE=4 SV=2
C1GT79	-1.18617	0.0762497	2304	0.000940888	0.000793214	Probable dipeptidyl-aminopeptidase B OS=Paracoccidioides lutzii (strain ATCC MYA-826 / Pb01) OX=502779 GN=DAPB PE=3 SV=1
C1HBB7	-1.18598	0.010914	1590	0.00173298	0.00146122	Uncharacterized protein OS=Paracoccidioides lutzii (strain ATCC MYA-826 / Pb01) OX=502779 GN=PAAG_08058 PE=3 SV=2
C1H998	-1.18578	0.00530144	1598	0.00123309	0.0010399	S-phase kinase-associated protein 1A OS=Paracoccidioides lutzii (strain ATCC MYA-826 / Pb01) OX=502779 GN=PAAG_07339 PE=3 SV=2
C1GU06	-1.18498	0.0444579	2274	0.000430297	0.000363127	Uncharacterized protein OS=Paracoccidioides lutzii (strain ATCC MYA-826 / Pb01) OX=502779 GN=PAAG_02001 PE=4 SV=1
C1GVS1	-1.18494	0.121041	1114	0.000277283	0.000234005	Uncharacterized protein OS=Paracoccidioides lutzii (strain ATCC MYA-826 / Pb01) OX=502779 GN=PAAG_02616 PE=4 SV=1
C1H0D6	-1.18437	0.317607	185	0.000174564	0.00014739	AP-1 complex subunit mu-1 OS=Paracoccidioides lutzii (strain ATCC MYA-826 / Pb01) OX=502779 GN=PAAG_04230 PE=3 SV=2
C1H8H6	-1.18347	0.196676	2044	0.000275722	0.000232977	Alpha-centractin OS=Paracoccidioides lutzii (strain ATCC MYA-826 / Pb01) OX=502779 GN=PAAG_06972 PE=3 SV=1
C1GUQ9	-1.18346	0.00811947	959	0.00166473	0.00140667	Quinone oxidoreductase OS=Paracoccidioides lutzii (strain ATCC MYA-826 / Pb01) OX=502779 GN=PAAG_02382 PE=4 SV=1
C1H6X7	-1.18337	0.151639	2196	0.000262401	0.000221741	Uncharacterized protein OS=Paracoccidioides lutzii (strain ATCC MYA-826 / Pb01) OX=502779 GN=PAAG_06518 PE=4 SV=2
C1H0V2	-1.18095	0.21412	198	0.000138661	0.000117416	Casein kinase II subunit beta OS=Paracoccidioides lutzii (strain ATCC MYA-826 / Pb01) OX=502779 GN=PAAG_04396 PE=3 SV=1
C1H0Z9	-1.18034	0.0581601	1281	0.00155422	0.00131676	Spermidine synthase OS=Paracoccidioides lutzii (strain ATCC MYA-826 / Pb01) OX=502779 GN=PAAG_04443 PE=3 SV=2
C1GQS3	-1.17856	0.0322934	700	0.0011518	0.000977293	Proteasome subunit beta OS=Paracoccidioides lutzii (strain ATCC MYA-826 / Pb01) OX=502779 GN=PAAG_00868 PE=3 SV=1
C1GQS1	-1.17776	0.0301346	354	0.000733514	0.000622807	Proteasome component C5 OS=Paracoccidioides lutzii (strain ATCC MYA-826 / Pb01) OX=502779 GN=PAAG_00866 PE=4 SV=1
C1GZ26	-1.17649	0.237646	2051	0.000122676	0.000104273	Uncharacterized protein OS=Paracoccidioides lutzii (strain ATCC MYA-826 / Pb01) OX=502779 GN=PAAG_03770 PE=4 SV=1
C1H7A2	-1.17636	0.0925354	1008	0.000567191	0.000482158	Uracil phosphoribosyltransferase OS=Paracoccidioides lutzii (strain ATCC MYA-826 / Pb01) OX=502779 GN=PAAG_06643 PE=4 SV=2
C1H630	-1.17616	0.10033	98	0.000567635	0.000482617	Eukaryotic translation initiation factor 1A OS=Paracoccidioides lutzii (strain ATCC MYA-826 / Pb01) OX=502779 GN=PAAG_06140 PE=3 SV=1
C1HBC1	-1.17579	0.103642	447	0.000137639	0.00011706	Uncharacterized protein OS=Paracoccidioides lutzii (strain ATCC MYA-826 / Pb01) OX=502779 GN=PAAG_08062 PE=4 SV=1
C1GUD9	-1.17446	0.306637	240	0.000122658	0.000104438	Autophagy-related protein 27 OS=Paracoccidioides lutzii (strain ATCC MYA-826 / Pb01) OX=502779 GN=PAAG_02134 PE=4 SV=1
C1H5Q4	-1.17353	0.17207	340	0.000776167	0.000661395	Transport protein SEC31 OS=Paracoccidioides lutzii (strain ATCC MYA-826 / Pb01) OX=502779 GN=PAAG_06249 PE=4 SV=1
C1HA56	-1.17322	0.100925	5	0.000746782	0.000636525	116 kDa U5 small nuclear ribonucleoprotein component OS=Paracoccidioides lutzii (strain ATCC MYA-826 / Pb01) OX=502779 GN=PAAG_07785 PE=4 SV=1
C1H355	-1.17288	0.106423	745	0.000748803	0.000638431	Chorismate mutase OS=Paracoccidioides lutzii (strain ATCC MYA-826 / Pb01) OX=502779 GN=PAAG_05198 PE=4 SV=2
C1HE01	-1.17272	0.0132929	2262	0.00190939	0.00162817	Leukotriene A(4) hydrolase OS=Paracoccidioides lutzii (strain ATCC MYA-826 / Pb01) OX=502779 GN=PAAG_08994 PE=3 SV=1
C1H7C7	-1.17179	0.181636	2023	0.000152137	0.000129833	Mitochondrial metallochaperone Sco1 OS=Paracoccidioides lutzii (strain ATCC MYA-826 / Pb01) OX=502779 GN=PAAG_06668 PE=4 SV=1
C1HB72	-1.17166	0.0973731	2316	0.000597122	0.000509639	Coproporphyrinogen III oxidase OS=Paracoccidioides lutzii (strain ATCC MYA-826 / Pb01) OX=502779 GN=PAAG_08013 PE=4 SV=2
C1GRX0	-1.17145	0.033049	1934	0.000610345	0.000521016	Uncharacterized protein OS=Paracoccidioides lutzii (strain ATCC MYA-826 / Pb01) OX=502779 GN=PAAG_01265 PE=3 SV=1
C1GZI8	-1.17107	0.0158396	675	0.00310558	0.00265191	Uncharacterized protein OS=Paracoccidioides lutzii (strain ATCC MYA-826 / Pb01) OX=502779 GN=PAAG_03932 PE=3 SV=1
A0A0A2UZW4	-1.16975	0.0673428	404	0.00030461	0.000260405	Argininosuccinate lyase OS=Paracoccidioides lutzii (strain ATCC MYA-826 / Pb01) OX=502779 GN=PAAG_12224 PE=4 SV=1
A0A0A2V535	-1.16846	0.0609586	146	0.000152137	0.000130203	Uncharacterized protein OS=Paracoccidioides lutzii (strain ATCC MYA-826 / Pb01) OX=502779 GN=PAAG_12088 PE=4 SV=1
C1GUF5	-1.16837	0.233434	2181	0.000317735	0.000271947	Acyl-CoA thioesterase II OS=Paracoccidioides lutzii (strain ATCC MYA-826 / Pb01) OX=502779 GN=PAAG_02150 PE=4 SV=2
A0A0A2VL17	-1.16813	0.179439	641	0.000208084	0.000178134	Uncharacterized protein OS=Paracoccidioides lutzii (strain ATCC MYA-826 / Pb01) OX=502779 GN=PAAG_11690 PE=4 SV=1
C1GP90	-1.16555	0.0105478	353	0.000636835	0.000546384	Uncharacterized protein OS=Paracoccidioides lutzii (strain ATCC MYA-826 / Pb01) OX=502779 GN=PAAG_00335 PE=4 SV=2
C1H3G9	-1.16402	0.178042	1884	0.000332646	0.000285774	Coatomer subunit delta OS=Paracoccidioides lutzii (strain ATCC MYA-826 / Pb01) OX=502779 GN=PAAG_05312 PE=3 SV=2
C1GWN1	-1.16351	0.122196	752	0.000622903	0.000535365	Superoxide dismutase OS=Paracoccidioides lutzii (strain ATCC MYA-826 / Pb01) OX=502779 GN=PAAG_02926 PE=3 SV=2
C1HBE1	-1.16344	0.00750367	2299	0.00195363	0.00167919	Plasma membrane ATPase OS=Paracoccidioides lutzii (strain ATCC MYA-826 / Pb01) OX=502779 GN=PAAG_08082 PE=3 SV=1
C1H009	-1.16329	0.140551	1935	0.00101186	0.000869822	Methylcrotonoyl-CoA carboxylase beta chain OS=Paracoccidioides lutzii (strain ATCC MYA-826 / Pb01) OX=502779 GN=PAAG_04103 PE=4 SV=1
C1GQ77	-1.16171	0.231206	1301	0.000484911	0.000417412	MRS7 family protein OS=Paracoccidioides lutzii (strain ATCC MYA-826 / Pb01) OX=502779 GN=PAAG_00672 PE=4 SV=1
C1HAJ5	-1.16155	0.160925	1077	0.000180925	0.000155762	Uncharacterized protein OS=Paracoccidioides lutzii (strain ATCC MYA-826 / Pb01) OX=502779 GN=PAAG_07649 PE=4 SV=1
C1H786	-1.16105	0.050944	1339	0.00033323	0.000287007	60S ribosomal protein L32 OS=Paracoccidioides lutzii (strain ATCC MYA-826 / Pb01) OX=502779 GN=PAAG_06627 PE=4 SV=2
C1H5R0	-1.16074	0.0985966	1333	0.000526125	0.000453268	GrpE protein homolog OS=Paracoccidioides lutzii (strain ATCC MYA-826 / Pb01) OX=502779 GN=PAAG_06255 PE=3 SV=1
C1HD18	-1.16011	0.0580805	1960	0.000499065	0.000430188	Uncharacterized protein OS=Paracoccidioides lutzii (strain ATCC MYA-826 / Pb01) OX=502779 GN=PAAG_08659 PE=4 SV=1
C1H7Q2	-1.16003	0.15977	999	0.000723786	0.00062394	Pre-mRNA-processing-splicing factor 8 OS=Paracoccidioides lutzii (strain ATCC MYA-826 / Pb01) OX=502779 GN=PAAG_06793 PE=4 SV=2
A0A0A2V2S3	-1.15933	0.0388833	1595	0.00140109	0.00120853	Acetyltransferase component of pyruvate dehydrogenase complex OS=Paracoccidioides lutzii (strain ATCC MYA-826 / Pb01) OX=502779 GN=PAAG_11035 PE=3 SV=1
C1HBV9	-1.15902	0.297216	582	0.000152137	0.000131263	Uncharacterized protein OS=Paracoccidioides lutzii (strain ATCC MYA-826 / Pb01) OX=502779 GN=PAAG_08250 PE=3 SV=1
C1GTU4	-1.15878	0.0564527	1968	0.000513249	0.000442922	60S ribosomal protein L27 OS=Paracoccidioides lutzii (strain ATCC MYA-826 / Pb01) OX=502779 GN=PAAG_01939 PE=3 SV=2
C1H213	-1.15865	0.122816	1947	0.00072125	0.000622492	Uncharacterized protein OS=Paracoccidioides lutzii (strain ATCC MYA-826 / Pb01) OX=502779 GN=PAAG_04949 PE=4 SV=1
C1H9U6	-1.15722	0.323908	1643	0.00031492	0.000272135	Malic enzyme OS=Paracoccidioides lutzii (strain ATCC MYA-826 / Pb01) OX=502779 GN=PAAG_07537 PE=3 SV=1
C1H1R0	-1.15625	0.159886	1715	0.000165919	0.000143498	COP9 signalosome complex subunit 4 OS=Paracoccidioides lutzii (strain ATCC MYA-826 / Pb01) OX=502779 GN=PAAG_04846 PE=4 SV=1
C1H769	-1.15572	0.0558892	1587	0.00176947	0.00153105	Phospholipase OS=Paracoccidioides lutzii (strain ATCC MYA-826 / Pb01) OX=502779 GN=PAAG_06610 PE=3 SV=2
C1H6L0	-1.15529	0.234618	1677	0.000193885	0.000167823	ER-derived vesicles protein ERV14 OS=Paracoccidioides lutzii (strain ATCC MYA-826 / Pb01) OX=502779 GN=PAAG_06401 PE=4 SV=1
C1HAD7	-1.15481	0.273647	1034	0.000357769	0.000309808	Diphosphomevalonate decarboxylase OS=Paracoccidioides lutzii (strain ATCC MYA-826 / Pb01) OX=502779 GN=PAAG_07591 PE=3 SV=1
C1GXA7	-1.15434	0.247933	1702	0.000165835	0.000143662	Long-chain-fatty-acid-CoA ligase OS=Paracoccidioides lutzii (strain ATCC MYA-826 / Pb01) OX=502779 GN=PAAG_03481 PE=4 SV=1
C1HBW1	-1.15419	0.0788212	1615	0.000902634	0.000782053	Clathrin light chain OS=Paracoccidioides lutzii (strain ATCC MYA-826 / Pb01) OX=502779 GN=PAAG_08252 PE=3 SV=2
C1HCR0	-1.15406	0.181953	2201	0.000180772	0.00015664	ATP synthase subunit g OS=Paracoccidioides lutzii (strain ATCC MYA-826 / Pb01) OX=502779 GN=PAAG_08551 PE=4 SV=1
C1GWL2	-1.15342	0.191352	1007	0.000568052	0.000492492	Uncharacterized protein OS=Paracoccidioides lutzii (strain ATCC MYA-826 / Pb01) OX=502779 GN=PAAG_02907 PE=4 SV=1
C1H558	-1.1529	0.289344	2210	0.000222352	0.000192863	UBX domain-containing protein OS=Paracoccidioides lutzii (strain ATCC MYA-826 / Pb01) OX=502779 GN=PAAG_05899 PE=4 SV=2
C1GUL3	-1.1523	0.0560636	1289	0.000970789	0.000842477	Uncharacterized protein OS=Paracoccidioides lutzii (strain ATCC MYA-826 / Pb01) OX=502779 GN=PAAG_02336 PE=4 SV=1
C1GVP9	-1.15156	0.167375	1889	0.000375311	0.000325914	Pantothenate synthetase OS=Paracoccidioides lutzii (strain ATCC MYA-826 / Pb01) OX=502779 GN=PAAG_02326 PE=3 SV=2
C1H9Y3	-1.15082	0.137768	2018	0.000194554	0.000169057	Surfeit locus protein OS=Paracoccidioides lutzii (strain ATCC MYA-826 / Pb01) OX=502779 GN=PAAG_07712 PE=4 SV=1
C1H4S1	-1.15055	0.225727	184	0.000179212	0.000155762	4-carboxymuconolactone decarboxylase family protein OS=Paracoccidioides lutzii (strain ATCC MYA-826 / Pb01) OX=502779 GN=PAAG_05761 PE=4 SV=1
C1GPA2	-1.15014	0.0170136	698	0.00127331	0.00110709	60S ribosomal protein L9-B OS=Paracoccidioides lutzii (strain ATCC MYA-826 / Pb01) OX=502779 GN=PAAG_00347 PE=4 SV=1
C1GXF8	-1.14871	0.00329472	1579	0.0038125	0.00331895	Actin OS=Paracoccidioides lutzii (strain ATCC MYA-826 / Pb01) OX=502779 GN=PAAG_03532 PE=3 SV=2
C1HA24	-1.14853	0.169738	131	0.000416683	0.000362798	RNA-binding La domain-containing protein OS=Paracoccidioides lutzii (strain ATCC MYA-826 / Pb01) OX=502779 GN=PAAG_07753 PE=4 SV=1
C1GUB5	-1.14801	0.348536	1144	9.29654e-05	8.09797e-05	Uncharacterized protein OS=Paracoccidioides lutzii (strain ATCC MYA-826 / Pb01) OX=502779 GN=PAAG_02110 PE=4 SV=1
C1H3S6	-1.14755	0.222834	2292	0.000376148	0.000327783	rRNA 2'-O-methyltransferase fibrillarin OS=Paracoccidioides lutzii (strain ATCC MYA-826 / Pb01) OX=502779 GN=PAAG_05419 PE=3 SV=1
C1GVI8	-1.14731	0.145978	139	0.000194386	0.000169427	Mitochondrial F1F0 ATP synthase subunit OS=Paracoccidioides lutzii (strain ATCC MYA-826 / Pb01) OX=502779 GN=PAAG_02265 PE=4 SV=1
C1GZY9	-1.14618	0.176471	2231	0.000165766	0.000144625	Uncharacterized protein OS=Paracoccidioides lutzii (strain ATCC MYA-826 / Pb01) OX=502779 GN=PAAG_04083 PE=4 SV=2
C1H9N1	-1.14588	0.0640117	1940	0.000777894	0.000678863	Transport protein SEC13 OS=Paracoccidioides lutzii (strain ATCC MYA-826 / Pb01) OX=502779 GN=PAAG_07472 PE=3 SV=1
C1GQF8	-1.14447	0.109414	2259	0.000667184	0.000582962	Proteasome subunit beta OS=Paracoccidioides lutzii (strain ATCC MYA-826 / Pb01) OX=502779 GN=PAAG_00753 PE=3 SV=2
C1H3J4	-1.14421	0.0793546	2284	0.000968005	0.000845999	40S ribosomal protein S22 OS=Paracoccidioides lutzii (strain ATCC MYA-826 / Pb01) OX=502779 GN=PAAG_05337 PE=3 SV=1
A0A0A2V7R0	-1.14396	0.202994	1392	0.000207193	0.000181119	Uncharacterized protein OS=Paracoccidioides lutzii (strain ATCC MYA-826 / Pb01) OX=502779 GN=PAAG_11066 PE=4 SV=1
C1H806	-1.1439	0.325663	2078	0.000173086	0.000151312	WD repeat-containing protein OS=Paracoccidioides lutzii (strain ATCC MYA-826 / Pb01) OX=502779 GN=PAAG_06897 PE=4 SV=1
A0A0A2UZP4	-1.14275	0.312615	1412	0.000103777	9.08135e-05	Uncharacterized protein OS=Paracoccidioides lutzii (strain ATCC MYA-826 / Pb01) OX=502779 GN=PAAG_12642 PE=4 SV=1
C1GS15	-1.1426	0.184238	347	0.000579831	0.000507465	2-oxoisovalerate dehydrogenase subunit alpha OS=Paracoccidioides lutzii (strain ATCC MYA-826 / Pb01) OX=502779 GN=PAAG_01310 PE=3 SV=1
C1HAQ2	-1.14257	0.269012	2002	0.000221781	0.000194108	Neutral ceramidase OS=Paracoccidioides lutzii (strain ATCC MYA-826 / Pb01) OX=502779 GN=PAAG_07881 PE=3 SV=1
C1GY65	-1.14231	0.158587	1944	0.000805973	0.000705563	60S ribosomal protein L6 OS=Paracoccidioides lutzii (strain ATCC MYA-826 / Pb01) OX=502779 GN=PAAG_03019 PE=3 SV=1
C1GR56	-1.14217	0.116062	1647	0.000387562	0.000339322	Uncharacterized protein OS=Paracoccidioides lutzii (strain ATCC MYA-826 / Pb01) OX=502779 GN=PAAG_01001 PE=3 SV=2
C1GY50	-1.14132	0.152248	796	0.000387449	0.000339475	Coatomer subunit beta OS=Paracoccidioides lutzii (strain ATCC MYA-826 / Pb01) OX=502779 GN=PAAG_03004 PE=4 SV=1
C1HDL5	-1.14119	0.0496949	1026	0.000652511	0.000571779	Nicotinate-nucleotide pyrophosphorylase [carboxylating] OS=Paracoccidioides lutzii (strain ATCC MYA-826 / Pb01) OX=502779 GN=PAAG_08856 PE=3 SV=1
C1H3W7	-1.14066	0.111041	2301	0.000903526	0.000792107	Glutamyl-tRNA(Gln) amidotransferase subunit A OS=Paracoccidioides lutzii (strain ATCC MYA-826 / Pb01) OX=502779 GN=PAAG_05460 PE=4 SV=2
C1H6Z7	-1.13976	0.00125361	1611	0.00105353	0.000924343	CAP20 protein OS=Paracoccidioides lutzii (strain ATCC MYA-826 / Pb01) OX=502779 GN=PAAG_06538 PE=4 SV=1
C1H2Q7	-1.13922	0.0767064	1299	0.000679615	0.00059656	Trehalose-6-phosphate synthase OS=Paracoccidioides lutzii (strain ATCC MYA-826 / Pb01) OX=502779 GN=PAAG_05050 PE=3 SV=2
C1GWG4	-1.13914	0.00122995	9	0.00256325	0.00225017	Adenosylhomocysteinase OS=Paracoccidioides lutzii (strain ATCC MYA-826 / Pb01) OX=502779 GN=PAAG_02859 PE=3 SV=1
C1GQS6	-1.13642	0.00404597	1602	0.00109504	0.000963594	30 kDa heat shock protein OS=Paracoccidioides lutzii (strain ATCC MYA-826 / Pb01) OX=502779 GN=PAAG_00871 PE=3 SV=2
C1GSU6	-1.13637	0.111224	532	0.00132715	0.00116788	Profilin OS=Paracoccidioides lutzii (strain ATCC MYA-826 / Pb01) OX=502779 GN=PAAG_01591 PE=3 SV=2
C1GYV3	-1.13583	0.278426	441	0.000248871	0.000219109	Galactose-1-phosphate uridylyltransferase OS=Paracoccidioides lutzii (strain ATCC MYA-826 / Pb01) OX=502779 GN=PAAG_03697 PE=3 SV=2
C1HDY0	-1.13514	0.112503	546	0.00109531	0.000964911	Tropomyosin-1 OS=Paracoccidioides lutzii (strain ATCC MYA-826 / Pb01) OX=502779 GN=PAAG_08973 PE=4 SV=2
C1GNG4	-1.13479	0.0409356	156	0.000221628	0.000195304	Uncharacterized protein OS=Paracoccidioides lutzii (strain ATCC MYA-826 / Pb01) OX=502779 GN=PAAG_00059 PE=4 SV=1
A0A0A2V418	-1.13466	0.189078	1049	0.000235926	0.000207926	U6 snRNA-associated Sm-like protein LSm8 OS=Paracoccidioides lutzii (strain ATCC MYA-826 / Pb01) OX=502779 GN=LSM8 PE=3 SV=1
C1H1A6	-1.1343	0.0984231	2269	0.00284637	0.00250935	Citrate synthase OS=Paracoccidioides lutzii (strain ATCC MYA-826 / Pb01) OX=502779 GN=PAAG_04550 PE=3 SV=1
C1GQN9	-1.13336	0.328166	833	0.000250736	0.000221233	Diacylglycerol O-acyltransferase 2A OS=Paracoccidioides lutzii (strain ATCC MYA-826 / Pb01) OX=502779 GN=PAAG_00834 PE=4 SV=1
C1H862	-1.13297	0.268883	766	0.000428696	0.000378382	Sorting nexin 3 OS=Paracoccidioides lutzii (strain ATCC MYA-826 / Pb01) OX=502779 GN=PAAG_07039 PE=4 SV=2
C1H074	-1.13271	0.309309	2039	0.00011071	9.7739e-05	Aqualysin-1 OS=Paracoccidioides lutzii (strain ATCC MYA-826 / Pb01) OX=502779 GN=PAAG_04168 PE=3 SV=2
C1HB71	-1.13254	0.318503	1679	0.000220181	0.000194414	Autophagy-related protein OS=Paracoccidioides lutzii (strain ATCC MYA-826 / Pb01) OX=502779 GN=PAAG_08012 PE=3 SV=1
C1GNK6	-1.13152	0.268148	1058	0.000221811	0.000196029	U6 snRNA-associated Sm-like protein LSm4 OS=Paracoccidioides lutzii (strain ATCC MYA-826 / Pb01) OX=502779 GN=LSM4 PE=3 SV=1
A0A0A2V4C5	-1.13148	0.0956729	789	0.000499635	0.000441576	Translation initiation factor SUI1 OS=Paracoccidioides lutzii (strain ATCC MYA-826 / Pb01) OX=502779 GN=PAAG_12116 PE=4 SV=1
Q96W30	-1.13099	0.0227165	1857	0.00982666	0.00868855	Heat shock 70 kDa protein 2 OS=Paracoccidioides lutzii (strain ATCC MYA-826 / Pb01) OX=502779 GN=HSP70-2 PE=2 SV=2; Additional IDs concatenated into MaxParsimony group: contaminant_GR78_RAT, contaminant_GR78_MESAU, contaminant_GR78_HUMAN, contaminant_GR78_YEAST, contaminant_GR78_SCHPO, contaminant_GR78_KLULA
C1HB17	-1.13085	0.0337887	15	0.00197059	0.00174257	Fimbrin OS=Paracoccidioides lutzii (strain ATCC MYA-826 / Pb01) OX=502779 GN=PAAG_07958 PE=4 SV=1
C1H723	-1.1308	0.295337	1135	0.00022085	0.000195304	Uncharacterized protein OS=Paracoccidioides lutzii (strain ATCC MYA-826 / Pb01) OX=502779 GN=PAAG_06564 PE=4 SV=1
C1GRF9	-1.13079	0.098172	1552	0.000662963	0.000586281	Proteasome component PUP1 OS=Paracoccidioides lutzii (strain ATCC MYA-826 / Pb01) OX=502779 GN=PAAG_01104 PE=4 SV=1
C1GWP5	-1.13021	0.165758	1896	0.000498843	0.000441374	TIA1 cytotoxic granule-associated RNA binding protein OS=Paracoccidioides lutzii (strain ATCC MYA-826 / Pb01) OX=502779 GN=PAAG_02940 PE=4 SV=2
C1GNW0	-1.12994	0.103588	1962	0.000485284	0.000429477	Uncharacterized protein OS=Paracoccidioides lutzii (strain ATCC MYA-826 / Pb01) OX=502779 GN=PAAG_00205 PE=4 SV=2
C1H935	-1.12993	0.0063407	17	0.00191097	0.00169123	Glycogen [starch] synthase OS=Paracoccidioides lutzii (strain ATCC MYA-826 / Pb01) OX=502779 GN=PAAG_07276 PE=3 SV=2
A0A0A2V6P4	-1.12908	0.0466539	960	0.00148413	0.00131445	Uncharacterized protein OS=Paracoccidioides lutzii (strain ATCC MYA-826 / Pb01) OX=502779 GN=PAAG_11497 PE=4 SV=1
C1GRW7	-1.12882	0.0173509	1242	0.00292506	0.00259126	Hsp70-like protein OS=Paracoccidioides lutzii (strain ATCC MYA-826 / Pb01) OX=502779 GN=PAAG_01262 PE=3 SV=2
C1H6U6	-1.12704	0.0477129	2288	0.00145543	0.00129137	60S ribosomal protein L7-C OS=Paracoccidioides lutzii (strain ATCC MYA-826 / Pb01) OX=502779 GN=PAAG_06487 PE=4 SV=2
C1H2D8	-1.12691	0.158437	1076	0.000291705	0.000258854	U4/U6 small nuclear ribonucleoprotein PRP4 OS=Paracoccidioides lutzii (strain ATCC MYA-826 / Pb01) OX=502779 GN=PAAG_04767 PE=4 SV=2
C1HDZ9	-1.12636	0.333583	219	0.000183336	0.000162768	Type 2A phosphatase activator tip41 OS=Paracoccidioides lutzii (strain ATCC MYA-826 / Pb01) OX=502779 GN=PAAG_08992 PE=4 SV=2
C1H260	-1.12616	0.182171	1300	0.000527799	0.000468672	40S ribosomal protein S15 OS=Paracoccidioides lutzii (strain ATCC MYA-826 / Pb01) OX=502779 GN=PAAG_04690 PE=3 SV=1
C1H1N4	-1.12481	0.00481402	2257	0.00293823	0.00261221	ATP synthase subunit alpha OS=Paracoccidioides lutzii (strain ATCC MYA-826 / Pb01) OX=502779 GN=PAAG_04820 PE=3 SV=1
C1HCQ6	-1.12376	0.317068	1989	0.000262584	0.000233665	Vacuolar protein sorting-associated protein 28 OS=Paracoccidioides lutzii (strain ATCC MYA-826 / Pb01) OX=502779 GN=PAAG_08547 PE=3 SV=2
Q96VN5	-1.12334	0.00456669	1583	0.00246741	0.0021965	Triosephosphate isomerase OS=Paracoccidioides lutzii (strain ATCC MYA-826 / Pb01) OX=502779 GN=TPI1 PE=1 SV=3
C1H4M9	-1.12218	0.328958	1101	0.000244516	0.000217895	U2 snRNP component prp10 OS=Paracoccidioides lutzii (strain ATCC MYA-826 / Pb01) OX=502779 GN=PAAG_05722 PE=4 SV=2
C1HE97	-1.1219	0.250689	1038	0.000234212	0.000208764	Uncharacterized protein OS=Paracoccidioides lutzii (strain ATCC MYA-826 / Pb01) OX=502779 GN=PAAG_09096 PE=3 SV=1
C1GR24	-1.12184	0.141427	1951	0.000802349	0.00071521	Ribosomal protein L15 OS=Paracoccidioides lutzii (strain ATCC MYA-826 / Pb01) OX=502779 GN=PAAG_00969 PE=3 SV=1
C1HB79	-1.12155	0.120099	312	0.000915901	0.000816638	26S proteasome regulatory subunit rpn-8 OS=Paracoccidioides lutzii (strain ATCC MYA-826 / Pb01) OX=502779 GN=PAAG_08020 PE=4 SV=1
C1GQ53	-1.12086	0.137397	1360	0.000291705	0.000260252	60S ribosomal protein L33-B OS=Paracoccidioides lutzii (strain ATCC MYA-826 / Pb01) OX=502779 GN=PAAG_00648 PE=3 SV=2
C1HBR8	-1.11989	0.0948499	94	0.000581627	0.000519359	Peroxin-11 OS=Paracoccidioides lutzii (strain ATCC MYA-826 / Pb01) OX=502779 GN=PAAG_08209 PE=4 SV=1
C1GV75	-1.11975	0.284432	398	0.000320979	0.000286652	Hydroxyacylglutathione hydrolase OS=Paracoccidioides lutzii (strain ATCC MYA-826 / Pb01) OX=502779 GN=PAAG_02548 PE=4 SV=1
C1H861	-1.11925	0.055414	1953	0.000582504	0.00052044	Methylthioribulose-1-phosphate dehydratase OS=Paracoccidioides lutzii (strain ATCC MYA-826 / Pb01) OX=502779 GN=MDE1 PE=3 SV=1
C1H6T2	-1.11906	0.122785	1282	0.00147193	0.00131532	Mannitol-1-phosphate 5-dehydrogenase OS=Paracoccidioides lutzii (strain ATCC MYA-826 / Pb01) OX=502779 GN=PAAG_06473 PE=3 SV=1
C1H3L3	-1.11906	0.238912	805	0.000277115	0.000247633	Uncharacterized protein OS=Paracoccidioides lutzii (strain ATCC MYA-826 / Pb01) OX=502779 GN=PAAG_05356 PE=3 SV=1
C1GU60	-1.11803	0.178453	774	0.000913365	0.000816944	Histone chaperone OS=Paracoccidioides lutzii (strain ATCC MYA-826 / Pb01) OX=502779 GN=PAAG_02055 PE=3 SV=1
C1H4U8	-1.11736	0.0257872	1985	0.000290966	0.000260405	Peptidyl-prolyl cis-trans isomerase OS=Paracoccidioides lutzii (strain ATCC MYA-826 / Pb01) OX=502779 GN=PAAG_05788 PE=3 SV=2
C1GZI7	-1.11728	0.139906	116	0.000539629	0.000482984	Glutathione S-transferase Gst3 OS=Paracoccidioides lutzii (strain ATCC MYA-826 / Pb01) OX=502779 GN=PAAG_03931 PE=3 SV=1
C1GTU6	-1.11514	0.0793918	2280	0.00145404	0.00130391	Proteasome subunit alpha type OS=Paracoccidioides lutzii (strain ATCC MYA-826 / Pb01) OX=502779 GN=PAAG_01941 PE=3 SV=2
C1H417	-1.11426	0.174932	1979	0.000346538	0.000311004	Integral membrane protein OS=Paracoccidioides lutzii (strain ATCC MYA-826 / Pb01) OX=502779 GN=PAAG_05510 PE=3 SV=1
C1H7G2	-1.11401	0.216348	1625	0.000707804	0.000635365	Trehalose-phosphatase OS=Paracoccidioides lutzii (strain ATCC MYA-826 / Pb01) OX=502779 GN=PAAG_06703 PE=4 SV=1
C1H826	-1.11371	0.0727549	1278	0.00124702	0.0011197	Glutamine synthetase OS=Paracoccidioides lutzii (strain ATCC MYA-826 / Pb01) OX=502779 GN=PAAG_07003 PE=3 SV=2
C1GTT9	-1.11354	0.113406	1865	0.000624935	0.000561216	Riboflavin synthase alpha chain OS=Paracoccidioides lutzii (strain ATCC MYA-826 / Pb01) OX=502779 GN=PAAG_01934 PE=4 SV=1
C1GX90	-1.11048	0.250016	804	0.000317317	0.000285747	Bleomycin hydrolase OS=Paracoccidioides lutzii (strain ATCC MYA-826 / Pb01) OX=502779 GN=PAAG_03464 PE=4 SV=1
C1GYW2	-1.11033	0.264054	1371	0.000375618	0.000338293	Nucleoporin Nup157/170 OS=Paracoccidioides lutzii (strain ATCC MYA-826 / Pb01) OX=502779 GN=PAAG_03706 PE=4 SV=2
C1H1Z5	-1.11021	0.240483	1957	0.000609929	0.000549383	Electron transfer flavoprotein subunit beta OS=Paracoccidioides lutzii (strain ATCC MYA-826 / Pb01) OX=502779 GN=PAAG_04931 PE=4 SV=2
C1H2H2	-1.10996	0.263325	400	0.000390263	0.0003516	60S ribosomal protein L31 OS=Paracoccidioides lutzii (strain ATCC MYA-826 / Pb01) OX=502779 GN=PAAG_04965 PE=4 SV=2
C1GQH8	-1.10964	0.0684819	520	0.00167498	0.00150948	DNA damage checkpoint protein rad24 OS=Paracoccidioides lutzii (strain ATCC MYA-826 / Pb01) OX=502779 GN=PAAG_00773 PE=3 SV=1
C1HA99	-1.10863	0.250748	1708	0.000158112	0.00014262	Uncharacterized protein OS=Paracoccidioides lutzii (strain ATCC MYA-826 / Pb01) OX=502779 GN=PAAG_07828 PE=4 SV=2
C1GRL3	-1.10847	0.152105	1901	0.00036025	0.000324998	Uncharacterized protein OS=Paracoccidioides lutzii (strain ATCC MYA-826 / Pb01) OX=502779 GN=PAAG_01158 PE=4 SV=1
C1H1W5	-1.10838	0.139154	989	0.00103959	0.000937932	Ubiquitin-conjugating enzyme OS=Paracoccidioides lutzii (strain ATCC MYA-826 / Pb01) OX=502779 GN=PAAG_04901 PE=3 SV=1
C1HE20	-1.10762	0.347938	471	0.000157164	0.000141894	Rho-GTPase-activating protein OS=Paracoccidioides lutzii (strain ATCC MYA-826 / Pb01) OX=502779 GN=PAAG_09013 PE=4 SV=1
C1GYK6	-1.10728	0.131541	1965	0.000734238	0.000663101	MICOS complex subunit MIC60 OS=Paracoccidioides lutzii (strain ATCC MYA-826 / Pb01) OX=502779 GN=MIC60 PE=3 SV=1
C1GQD5	-1.10692	0.0217802	686	0.00317564	0.0028689	Clathrin heavy chain OS=Paracoccidioides lutzii (strain ATCC MYA-826 / Pb01) OX=502779 GN=PAAG_00730 PE=3 SV=2
C1GQ90	-1.10643	0.0379312	1266	0.00214602	0.00193958	Alpha-mannosidase OS=Paracoccidioides lutzii (strain ATCC MYA-826 / Pb01) OX=502779 GN=PAAG_00685 PE=4 SV=1
C1GS29	-1.10527	0.16138	1000	0.000789739	0.000714522	Folic acid synthesis protein OS=Paracoccidioides lutzii (strain ATCC MYA-826 / Pb01) OX=502779 GN=PAAG_01324 PE=4 SV=2
C1H114	-1.10459	0.124416	1961	0.000733178	0.000663759	Prohibitin-1 OS=Paracoccidioides lutzii (strain ATCC MYA-826 / Pb01) OX=502779 GN=PAAG_04458 PE=4 SV=1
C1H6Y8	-1.10415	0.330466	2296	0.000402874	0.000364872	Uncharacterized protein OS=Paracoccidioides lutzii (strain ATCC MYA-826 / Pb01) OX=502779 GN=PAAG_06529 PE=4 SV=2
C1H4Y6	-1.10412	0.160583	399	0.000359581	0.000325671	Glycolipid transferprotein HET-C2 OS=Paracoccidioides lutzii (strain ATCC MYA-826 / Pb01) OX=502779 GN=PAAG_05827 PE=4 SV=1
C1HBC4	-1.10372	0.0355442	979	0.000747546	0.000677297	Aspartate-semialdehyde dehydrogenase OS=Paracoccidioides lutzii (strain ATCC MYA-826 / Pb01) OX=502779 GN=PAAG_08065 PE=4 SV=2
C1GXU6	-1.10339	0.329032	2030	0.000157547	0.000142784	Dolichyl-diphosphooligosaccharide--protein glycosyltransferase subunit 2 OS=Paracoccidioides lutzii (strain ATCC MYA-826 / Pb01) OX=502779 GN=PAAG_03229 PE=3 SV=2
C1GYZ9	-1.10329	0.230948	2285	0.00038887	0.000352464	Uncharacterized protein OS=Paracoccidioides lutzii (strain ATCC MYA-826 / Pb01) OX=502779 GN=PAAG_03743 PE=4 SV=1
C1GVT9	-1.1032	0.162506	728	0.000901702	0.000817349	40S ribosomal protein S6 OS=Paracoccidioides lutzii (strain ATCC MYA-826 / Pb01) OX=502779 GN=PAAG_02634 PE=3 SV=1
C1HB87	-1.10292	0.042687	2325	0.000429658	0.000389565	GTP-binding protein ypt1 OS=Paracoccidioides lutzii (strain ATCC MYA-826 / Pb01) OX=502779 GN=PAAG_08028 PE=4 SV=2
C1HAH5	-1.10253	0.294121	1737	0.000158392	0.000143662	Endosomal cargo receptor (Erp5) OS=Paracoccidioides lutzii (strain ATCC MYA-826 / Pb01) OX=502779 GN=PAAG_07629 PE=3 SV=1
C1H2W0	-1.10238	0.12348	1604	0.00114842	0.00104176	Threonyl-tRNA synthetase OS=Paracoccidioides lutzii (strain ATCC MYA-826 / Pb01) OX=502779 GN=PAAG_05103 PE=3 SV=1
C1H483	-1.10206	0.0825885	689	0.00157978	0.00143348	ATP synthase subunit gamma OS=Paracoccidioides lutzii (strain ATCC MYA-826 / Pb01) OX=502779 GN=PAAG_05576 PE=3 SV=2
C1GQ27	-1.10135	0.135427	381	0.000428836	0.000389374	Mitochondrial fission 1 protein OS=Paracoccidioides lutzii (strain ATCC MYA-826 / Pb01) OX=502779 GN=PAAG_00622 PE=3 SV=2
C1GSY5	-1.10063	0.268896	351	0.000360137	0.00032721	Small nuclear ribonucleoprotein LSM2 OS=Paracoccidioides lutzii (strain ATCC MYA-826 / Pb01) OX=502779 GN=PAAG_01630 PE=4 SV=2
C1GPT4	-1.10037	0.171244	1321	0.000429588	0.000390402	Cytoskeletal adaptor protein SagA OS=Paracoccidioides lutzii (strain ATCC MYA-826 / Pb01) OX=502779 GN=PAAG_00529 PE=4 SV=1
C1GZ30	-1.10021	0.176725	365	0.000471183	0.000428266	S-(hydroxymethyl)glutathione dehydrogenase OS=Paracoccidioides lutzii (strain ATCC MYA-826 / Pb01) OX=502779 GN=PAAG_03774 PE=3 SV=2
C1HBH6	-1.10019	0.055649	746	0.000929794	0.000845121	RuvB-like helicase OS=Paracoccidioides lutzii (strain ATCC MYA-826 / Pb01) OX=502779 GN=PAAG_08117 PE=3 SV=1
C1H5A2	-1.09998	0.0582177	327	0.00090212	0.000820122	26S proteasome non-ATPase regulatory subunit 12 OS=Paracoccidioides lutzii (strain ATCC MYA-826 / Pb01) OX=502779 GN=PAAG_05943 PE=4 SV=1
C1H7K2	-1.09938	0.248635	372	0.000387492	0.000352464	Ribosomal protein L23e OS=Paracoccidioides lutzii (strain ATCC MYA-826 / Pb01) OX=502779 GN=PAAG_06743 PE=3 SV=2
A0A0A2V6U8	-1.09867	0.0431122	951	0.00221737	0.00201823	Phosphoglucomutase OS=Paracoccidioides lutzii (strain ATCC MYA-826 / Pb01) OX=502779 GN=PAAG_11415 PE=3 SV=1
C1GU89	-1.09823	0.19867	1314	0.000484377	0.000441053	Ubiquitin-conjugating enzyme OS=Paracoccidioides lutzii (strain ATCC MYA-826 / Pb01) OX=502779 GN=PAAG_02084 PE=4 SV=1
C1H064	-1.0981	0.198808	1623	0.000415861	0.000378711	Uncharacterized protein OS=Paracoccidioides lutzii (strain ATCC MYA-826 / Pb01) OX=502779 GN=PAAG_04158 PE=4 SV=1
C1GTT6	-1.09795	0.0568042	61	0.000958012	0.000872549	Phosphoacetylglucosamine mutase OS=Paracoccidioides lutzii (strain ATCC MYA-826 / Pb01) OX=502779 GN=PAAG_01931 PE=3 SV=2
C1GXG2	-1.09774	0.153318	707	0.00109889	0.00100105	Proteasome endopeptidase complex OS=Paracoccidioides lutzii (strain ATCC MYA-826 / Pb01) OX=502779 GN=PAAG_03536 PE=3 SV=1
C1GVY4	-1.09756	0.258056	1864	0.000525486	0.000478775	V-type proton ATPase subunit a OS=Paracoccidioides lutzii (strain ATCC MYA-826 / Pb01) OX=502779 GN=PAAG_02679 PE=3 SV=2
C1HC68	-1.09693	0.252797	2281	0.00105034	0.000957526	Coatomer subunit alpha OS=Paracoccidioides lutzii (strain ATCC MYA-826 / Pb01) OX=502779 GN=PAAG_08359 PE=4 SV=2
C1GY19	-1.0965	0.156197	1315	0.000470291	0.000428901	Diploid state maintenance protein chpA OS=Paracoccidioides lutzii (strain ATCC MYA-826 / Pb01) OX=502779 GN=PAAG_02973 PE=4 SV=1
C1GVH4	-1.09558	0.139161	2303	0.00101144	0.000923197	Asparaginyl-tRNA synthetase OS=Paracoccidioides lutzii (strain ATCC MYA-826 / Pb01) OX=502779 GN=PAAG_02251 PE=4 SV=2
C1GNF8	-1.09537	0.0872233	683	0.00331064	0.0030224	Malate dehydrogenase OS=Paracoccidioides lutzii (strain ATCC MYA-826 / Pb01) OX=502779 GN=PAAG_00053 PE=3 SV=1
C1H8M3	-1.09496	0.0644872	687	0.00211035	0.00192734	Argininosuccinate synthase OS=Paracoccidioides lutzii (strain ATCC MYA-826 / Pb01) OX=502779 GN=PAAG_07114 PE=3 SV=2
C1H5N0	-1.09363	0.416124	230	0.000105536	9.65009e-05	Uncharacterized protein OS=Paracoccidioides lutzii (strain ATCC MYA-826 / Pb01) OX=502779 GN=PAAG_06225 PE=4 SV=2
C1HBV6	-1.09358	0.183156	1277	0.000927429	0.00084807	Calmodulin OS=Paracoccidioides lutzii (strain ATCC MYA-826 / Pb01) OX=502779 GN=PAAG_08247 PE=3 SV=2
C1GZW5	-1.09355	0.188316	2319	0.00058178	0.000532008	Uncharacterized protein OS=Paracoccidioides lutzii (strain ATCC MYA-826 / Pb01) OX=502779 GN=PAAG_04059 PE=4 SV=2
C1H3K7	-1.09318	0.183127	1003	0.000539867	0.00049385	Mitochondrial phosphate carrier protein OS=Paracoccidioides lutzii (strain ATCC MYA-826 / Pb01) OX=502779 GN=PAAG_05350 PE=3 SV=2
C1H3I5	-1.09295	0.0130761	1905	0.00400708	0.00366631	3-isopropylmalate dehydrogenase OS=Paracoccidioides lutzii (strain ATCC MYA-826 / Pb01) OX=502779 GN=PAAG_05328 PE=3 SV=2
C1HB14	-1.09265	0.00905907	1573	0.000554705	0.000507668	60S ribosomal protein L18 OS=Paracoccidioides lutzii (strain ATCC MYA-826 / Pb01) OX=502779 GN=PAAG_07955 PE=4 SV=1
C1GS20	-1.09198	0.362535	1119	0.000112963	0.000103447	Stromal membrane-associated protein OS=Paracoccidioides lutzii (strain ATCC MYA-826 / Pb01) OX=502779 GN=PAAG_01315 PE=4 SV=1
C1GSD8	-1.09148	0.0770117	530	0.00157856	0.00144626	40S ribosomal protein S14 OS=Paracoccidioides lutzii (strain ATCC MYA-826 / Pb01) OX=502779 GN=PAAG_01433 PE=3 SV=1
C1H0X0	-1.09137	0.125522	1952	0.000624767	0.000572463	Uncharacterized protein OS=Paracoccidioides lutzii (strain ATCC MYA-826 / Pb01) OX=502779 GN=PAAG_04414 PE=4 SV=1
C1H1J2	-1.09096	0.298529	1975	0.000511495	0.000468848	Deubiquitination-protection protein dph1 OS=Paracoccidioides lutzii (strain ATCC MYA-826 / Pb01) OX=502779 GN=PAAG_04636 PE=4 SV=1
C1H7S0	-1.0906	0.0388163	517	0.00276935	0.00253928	Heat shock protein STI1 OS=Paracoccidioides lutzii (strain ATCC MYA-826 / Pb01) OX=502779 GN=PAAG_06811 PE=4 SV=1
C1GWV6	-1.09059	0.201901	2297	0.00169072	0.00155028	Dihydrolipoyl dehydrogenase OS=Paracoccidioides lutzii (strain ATCC MYA-826 / Pb01) OX=502779 GN=PAAG_03330 PE=3 SV=2
C1H4T8	-1.09019	0.205936	1639	0.000569141	0.000522056	40S ribosomal protein S19 OS=Paracoccidioides lutzii (strain ATCC MYA-826 / Pb01) OX=502779 GN=PAAG_05778 PE=4 SV=1
C1GUM9	-1.08961	0.258266	2320	0.000608914	0.000558839	Molybdopterin binding domain-containing protein OS=Paracoccidioides lutzii (strain ATCC MYA-826 / Pb01) OX=502779 GN=PAAG_02352 PE=4 SV=1
C1H3B0	-1.08958	0.119899	715	0.00114833	0.00105393	Multifunctional fusion protein OS=Paracoccidioides lutzii (strain ATCC MYA-826 / Pb01) OX=502779 GN=PAAG_05253 PE=3 SV=1
A0A0A2VKC6	-1.08955	0.197117	1922	0.00142834	0.00131095	Uncharacterized protein OS=Paracoccidioides lutzii (strain ATCC MYA-826 / Pb01) OX=502779 GN=PAAG_11921 PE=4 SV=1
C1GUY5	-1.08891	0.0921199	74	0.000581041	0.000533597	GTP-binding protein ypt7 OS=Paracoccidioides lutzii (strain ATCC MYA-826 / Pb01) OX=502779 GN=PAAG_02458 PE=4 SV=1
C1H905	-1.08884	0.157795	352	0.000637574	0.000585553	Uncharacterized protein OS=Paracoccidioides lutzii (strain ATCC MYA-826 / Pb01) OX=502779 GN=PAAG_07246 PE=4 SV=1
C1HAI0	-1.08766	0.155033	1593	0.00130478	0.00119962	Small GTPase RhoA OS=Paracoccidioides lutzii (strain ATCC MYA-826 / Pb01) OX=502779 GN=PAAG_07634 PE=4 SV=1
C1H2B4	-1.08763	0.14315	1950	0.000693243	0.000637388	Casein kinase II subunit alpha OS=Paracoccidioides lutzii (strain ATCC MYA-826 / Pb01) OX=502779 GN=PAAG_04743 PE=3 SV=1
C1H6U8	-1.08733	0.359986	1039	0.000468968	0.000431302	Eukaryotic translation initiation factor 3 subunit C OS=Paracoccidioides lutzii (strain ATCC MYA-826 / Pb01) OX=502779 GN=NIP1 PE=3 SV=1
C1GW57	-1.08416	0.106576	72	0.000748284	0.000690197	Glyoxylate reductase OS=Paracoccidioides lutzii (strain ATCC MYA-826 / Pb01) OX=502779 GN=PAAG_02752 PE=3 SV=1
C1H8H8	-1.08277	0.025081	1137	7.04146e-05	6.50319e-05	U1 small nuclear ribonucleoprotein C OS=Paracoccidioides lutzii (strain ATCC MYA-826 / Pb01) OX=502779 GN=PAAG_06974 PE=3 SV=2
C1GYN4	-1.08198	0.144793	727	0.000788654	0.000728901	Nuclear movement protein nudC OS=Paracoccidioides lutzii (strain ATCC MYA-826 / Pb01) OX=502779 GN=PAAG_03188 PE=4 SV=1
C1H243	-1.08152	0.368551	457	0.00023658	0.000218747	Suppressor protein of bem1/bed5 double mutants OS=Paracoccidioides lutzii (strain ATCC MYA-826 / Pb01) OX=502779 GN=PAAG_04673 PE=4 SV=1
C1HC58	-1.08019	0.151121	679	0.00210725	0.00195082	C-1-tetrahydrofolate synthase OS=Paracoccidioides lutzii (strain ATCC MYA-826 / Pb01) OX=502779 GN=PAAG_08349 PE=3 SV=2
C1GRN3	-1.0801	0.116349	14	0.00193822	0.00179448	6-phosphogluconate dehydrogenase, decarboxylating OS=Paracoccidioides lutzii (strain ATCC MYA-826 / Pb01) OX=502779 GN=PAAG_01178 PE=3 SV=2
C1GYW7	-1.08	0.419347	1664	0.000205648	0.000190415	Karyopherin OS=Paracoccidioides lutzii (strain ATCC MYA-826 / Pb01) OX=502779 GN=PAAG_03711 PE=4 SV=2
C1GQD6	-1.07976	0.152837	20	0.00185618	0.00171907	Bifunctional purine biosynthesis protein ADE17 OS=Paracoccidioides lutzii (strain ATCC MYA-826 / Pb01) OX=502779 GN=PAAG_00731 PE=3 SV=2
C1H8F5	-1.07912	0.0142742	950	0.00196691	0.0018227	Isocitrate lyase OS=Paracoccidioides lutzii (strain ATCC MYA-826 / Pb01) OX=502779 GN=PAAG_06951 PE=3 SV=1
C1H0K2	-1.07878	0.00738677	1749	6.96369e-05	6.45518e-05	Queuine tRNA-ribosyltransferase accessory subunit 2 OS=Paracoccidioides lutzii (strain ATCC MYA-826 / Pb01) OX=502779 GN=PAAG_04296 PE=3 SV=1
C1GQ94	-1.07865	0.178019	545	0.00102392	0.000949259	ATP-dependent RNA helicase eIF4A OS=Paracoccidioides lutzii (strain ATCC MYA-826 / Pb01) OX=502779 GN=PAAG_00689 PE=3 SV=2
C1GQF2	-1.07798	0.13666	941	0.00102554	0.000951353	Eukaryotic translation initiation factor 2 subunit gamma OS=Paracoccidioides lutzii (strain ATCC MYA-826 / Pb01) OX=502779 GN=PAAG_00747 PE=4 SV=2
C1H662	-1.07789	0.143466	708	0.00106634	0.00098928	Phosphotransferase OS=Paracoccidioides lutzii (strain ATCC MYA-826 / Pb01) OX=502779 GN=PAAG_06172 PE=3 SV=1
C1GYX8	-1.0777	0.0104852	837	7.01596e-05	6.51013e-05	Acyl-CoA desaturase OS=Paracoccidioides lutzii (strain ATCC MYA-826 / Pb01) OX=502779 GN=PAAG_03722 PE=3 SV=1
C1GNH6	-1.07759	0.162592	703	0.00114887	0.00106615	Proteasome subunit alpha type OS=Paracoccidioides lutzii (strain ATCC MYA-826 / Pb01) OX=502779 GN=PAAG_00071 PE=3 SV=1
C1GXZ4	-1.07717	0.115243	980	0.00113568	0.00105432	Pre-mRNA-processing factor 39 OS=Paracoccidioides lutzii (strain ATCC MYA-826 / Pb01) OX=502779 GN=PAAG_03277 PE=4 SV=2
C1GXI2	-1.07665	0.0709507	1265	0.00216136	0.00200749	Elongation factor 1-gamma 1 OS=Paracoccidioides lutzii (strain ATCC MYA-826 / Pb01) OX=502779 GN=PAAG_03556 PE=4 SV=1
C1GXD2	-1.07639	0.130239	537	0.0014436	0.00134115	Glutamate decarboxylase OS=Paracoccidioides lutzii (strain ATCC MYA-826 / Pb01) OX=502779 GN=PAAG_03506 PE=3 SV=1
C1GUD5	-1.07427	0.0345596	1582	0.00299268	0.00278577	Heat shock protein HSP98 OS=Paracoccidioides lutzii (strain ATCC MYA-826 / Pb01) OX=502779 GN=PAAG_02130 PE=3 SV=1
C1GTP0	-1.07384	0.386954	395	0.000429893	0.000400333	Galactokinase OS=Paracoccidioides lutzii (strain ATCC MYA-826 / Pb01) OX=502779 GN=PAAG_01885 PE=4 SV=2
C1GV97	-1.073	0.380599	870	0.000223233	0.000208046	Probable vacuolar protein sorting-associated protein 16 homolog OS=Paracoccidioides lutzii (strain ATCC MYA-826 / Pb01) OX=502779 GN=PAAG_02570 PE=3 SV=2
A0A0A2V0Y3	-1.07289	0.0054769	858	6.98468e-05	6.51013e-05	Uncharacterized protein OS=Paracoccidioides lutzii (strain ATCC MYA-826 / Pb01) OX=502779 GN=PAAG_11826 PE=4 SV=1
C1GSD7	-1.07282	0.370581	1721	0.000223244	0.000208091	Prephenate dehydrogenase [NADP(+)] OS=Paracoccidioides lutzii (strain ATCC MYA-826 / Pb01) OX=502779 GN=PAAG_01432 PE=3 SV=2
C1GZW3	-1.07218	0.0147495	479	6.96369e-05	6.49487e-05	Uncharacterized protein OS=Paracoccidioides lutzii (strain ATCC MYA-826 / Pb01) OX=502779 GN=PAAG_04057 PE=4 SV=2
C1HB46	-1.07118	0.0148823	2121	0.000137465	0.00012833	Vacuolar transporter chaperone 3 OS=Paracoccidioides lutzii (strain ATCC MYA-826 / Pb01) OX=502779 GN=PAAG_07987 PE=4 SV=1
C1H1K3	-1.07114	0.336711	872	0.000125048	0.000116743	Uncharacterized protein OS=Paracoccidioides lutzii (strain ATCC MYA-826 / Pb01) OX=502779 GN=PAAG_04647 PE=4 SV=1
contaminant_GR78_HUMAN	-1.0711	0.0276927	1	6.96555e-05	6.50319e-05	78 KD GLUCOSE REGULATED PROTEIN PRECURSOR (GRP 78) (IMMUNOGLOBULIN...
C1HCH8	-1.07091	0.39696	1674	0.000194902	0.000181997	Inorganic phosphate transporter OS=Paracoccidioides lutzii (strain ATCC MYA-826 / Pb01) OX=502779 GN=PAAG_08469 PE=4 SV=2
C1H329	-1.07071	0.327693	409	0.000389579	0.000363853	Zinc finger protein zpr1 OS=Paracoccidioides lutzii (strain ATCC MYA-826 / Pb01) OX=502779 GN=PAAG_05172 PE=4 SV=1
C1HDP3	-1.07036	0.375585	1986	0.00022156	0.000206995	2,2-dialkylglycine decarboxylase OS=Paracoccidioides lutzii (strain ATCC MYA-826 / Pb01) OX=502779 GN=PAAG_08900 PE=3 SV=1
A0A0A2VMA2	-1.06962	0.159969	985	0.000818429	0.000765161	Uncharacterized protein OS=Paracoccidioides lutzii (strain ATCC MYA-826 / Pb01) OX=502779 GN=PAAG_11162 PE=4 SV=1
C1HAQ8	-1.06943	0.330332	800	0.000594794	0.000556181	cAMP-dependent protein kinase regulatory subunit OS=Paracoccidioides lutzii (strain ATCC MYA-826 / Pb01) OX=502779 GN=PAAG_07887 PE=4 SV=2
C1H955	-1.06893	0.270824	1999	0.000194554	0.000182009	Uncharacterized protein OS=Paracoccidioides lutzii (strain ATCC MYA-826 / Pb01) OX=502779 GN=PAAG_07296 PE=4 SV=2
C1GY33	-1.06854	0.291135	1349	0.000290966	0.000272302	Endosomal P24B protein OS=Paracoccidioides lutzii (strain ATCC MYA-826 / Pb01) OX=502779 GN=PAAG_02987 PE=3 SV=2
C1H5Z3	-1.06796	0.225403	384	0.000415876	0.000389412	Succinate dehydrogenase [ubiquinone] iron-sulfur subunit, mitochondrial OS=Paracoccidioides lutzii (strain ATCC MYA-826 / Pb01) OX=502779 GN=PAAG_06103 PE=3 SV=2
C1GY64	-1.06794	0.321607	777	0.000514726	0.000481979	Uncharacterized protein OS=Paracoccidioides lutzii (strain ATCC MYA-826 / Pb01) OX=502779 GN=PAAG_03018 PE=4 SV=1
C1GRA0	-1.06773	0.264562	1642	0.000389608	0.000364895	Uncharacterized protein OS=Paracoccidioides lutzii (strain ATCC MYA-826 / Pb01) OX=502779 GN=PAAG_01045 PE=4 SV=2
C1H8A3	-1.06758	0.0107073	1852	6.93382e-05	6.49487e-05	Ubiquitin OS=Paracoccidioides lutzii (strain ATCC MYA-826 / Pb01) OX=502779 GN=PAAG_07080 PE=4 SV=1
C1GP52	-1.06749	0.239903	1923	0.000998576	0.00093544	Uncharacterized protein OS=Paracoccidioides lutzii (strain ATCC MYA-826 / Pb01) OX=502779 GN=PAAG_00297 PE=4 SV=1
C1H1K7	-1.06739	0.221515	34	0.00117942	0.00110496	GTP-binding nuclear protein OS=Paracoccidioides lutzii (strain ATCC MYA-826 / Pb01) OX=502779 GN=PAAG_04651 PE=3 SV=1
C1HDS2	-1.06708	0.183386	539	0.00135674	0.00127144	Dihydrolipoamide succinyltransferase OS=Paracoccidioides lutzii (strain ATCC MYA-826 / Pb01) OX=502779 GN=PAAG_08915 PE=4 SV=2
C1H5A5	-1.06691	0.190476	1629	0.00037378	0.00035034	40S ribosomal protein S27 OS=Paracoccidioides lutzii (strain ATCC MYA-826 / Pb01) OX=502779 GN=PAAG_05946 PE=3 SV=2
C1H2M4	-1.06683	0.255285	1648	0.000360166	0.000337606	40S ribosomal protein S10-A OS=Paracoccidioides lutzii (strain ATCC MYA-826 / Pb01) OX=502779 GN=PAAG_05017 PE=4 SV=2
C1H5M2	-1.06657	0.283724	1307	0.0005277	0.000494766	Acetylornithine aminotransferase OS=Paracoccidioides lutzii (strain ATCC MYA-826 / Pb01) OX=502779 GN=PAAG_06217 PE=3 SV=1
C1GY87	-1.06637	0.39955	159	0.000180118	0.000168907	Thioesterase family protein OS=Paracoccidioides lutzii (strain ATCC MYA-826 / Pb01) OX=502779 GN=PAAG_03041 PE=4 SV=2
C1GXN9	-1.06636	0.291312	346	0.000553744	0.000519285	Phosphoserine aminotransferase OS=Paracoccidioides lutzii (strain ATCC MYA-826 / Pb01) OX=502779 GN=PAAG_03613 PE=3 SV=1
C1GPK2	-1.06624	0.39378	1434	0.000165904	0.000155597	Vacuolar membrane protein pep3 OS=Paracoccidioides lutzii (strain ATCC MYA-826 / Pb01) OX=502779 GN=PAAG_00447 PE=4 SV=2
C1GTI9	-1.06618	0.0586358	336	0.000679921	0.000637718	60S ribosomal protein L16 OS=Paracoccidioides lutzii (strain ATCC MYA-826 / Pb01) OX=502779 GN=PAAG_01834 PE=3 SV=1
A0A0A2V5P3	-1.06533	0.318565	1902	0.000416099	0.000390581	Uncharacterized protein OS=Paracoccidioides lutzii (strain ATCC MYA-826 / Pb01) OX=502779 GN=PAAG_11815 PE=4 SV=1
C1H7M1	-1.06521	0.291373	1080	0.000263223	0.00024711	RNA-binding protein 8A OS=Paracoccidioides lutzii (strain ATCC MYA-826 / Pb01) OX=502779 GN=PAAG_06761 PE=4 SV=1
C1GRA5	-1.06514	0.305913	64	0.000555457	0.000521486	Cytosolic large ribosomal subunit protein L30 OS=Paracoccidioides lutzii (strain ATCC MYA-826 / Pb01) OX=502779 GN=PAAG_01050 PE=3 SV=1
C1HAP3	-1.06508	0.00624188	137	0.000208014	0.000195304	Uncharacterized protein OS=Paracoccidioides lutzii (strain ATCC MYA-826 / Pb01) OX=502779 GN=PAAG_07872 PE=4 SV=1
C1H9P9	-1.06508	0.00624188	208	6.93382e-05	6.51013e-05	Glutaredoxin OS=Paracoccidioides lutzii (strain ATCC MYA-826 / Pb01) OX=502779 GN=PAAG_07490 PE=3 SV=1
C1HBF5	-1.06508	0.00624188	659	6.93382e-05	6.51013e-05	Uncharacterized protein OS=Paracoccidioides lutzii (strain ATCC MYA-826 / Pb01) OX=502779 GN=PAAG_08096 PE=4 SV=1
C1GXM6	-1.06508	0.00624188	2072	6.93382e-05	6.51013e-05	Uncharacterized protein OS=Paracoccidioides lutzii (strain ATCC MYA-826 / Pb01) OX=502779 GN=PAAG_03600 PE=4 SV=2
C1GWB6	-1.06508	0.00624188	1130	6.93382e-05	6.51013e-05	Cytochrome c oxidase assembly protein COX19 OS=Paracoccidioides lutzii (strain ATCC MYA-826 / Pb01) OX=502779 GN=PAAG_02811 PE=4 SV=1
C1GW04	-1.06508	0.00624188	647	6.93382e-05	6.51013e-05	Uncharacterized protein OS=Paracoccidioides lutzii (strain ATCC MYA-826 / Pb01) OX=502779 GN=PAAG_02699 PE=4 SV=2
C1H5B6	-1.06508	0.00624188	204	0.000138676	0.000130203	Uncharacterized protein OS=Paracoccidioides lutzii (strain ATCC MYA-826 / Pb01) OX=502779 GN=PAAG_05957 PE=4 SV=2
C1GTP5	-1.06508	0.00624188	229	6.93382e-05	6.51013e-05	Uncharacterized protein OS=Paracoccidioides lutzii (strain ATCC MYA-826 / Pb01) OX=502779 GN=PAAG_01890 PE=4 SV=2
C1GPS2	-1.06508	0.00624188	1393	0.000138676	0.000130203	MICOS complex subunit MIC10 OS=Paracoccidioides lutzii (strain ATCC MYA-826 / Pb01) OX=502779 GN=PAAG_00517 PE=3 SV=2
C1H2V9	-1.06508	0.00624188	1694	6.93382e-05	6.51013e-05	H/ACA ribonucleoprotein complex subunit OS=Paracoccidioides lutzii (strain ATCC MYA-826 / Pb01) OX=502779 GN=PAAG_05102 PE=3 SV=1
C1H1K2	-1.06508	0.00624188	2200	6.93382e-05	6.51013e-05	Mold-specific protein MS95 OS=Paracoccidioides lutzii (strain ATCC MYA-826 / Pb01) OX=502779 GN=PAAG_04646 PE=4 SV=1
C1GSG8	-1.06502	0.0740682	684	0.00286782	0.00269273	Succinate--CoA ligase [ADP-forming] subunit beta, mitochondrial OS=Paracoccidioides lutzii (strain ATCC MYA-826 / Pb01) OX=502779 GN=PAAG_01463 PE=3 SV=1
C1GT05	-1.065	0.28688	151	0.00025011	0.000234846	Monothiol glutaredoxin-5 OS=Paracoccidioides lutzii (strain ATCC MYA-826 / Pb01) OX=502779 GN=PAAG_01650 PE=4 SV=1
C1GUS3	-1.0649	0.0453508	551	0.000984348	0.000924358	Actin OS=Paracoccidioides lutzii (strain ATCC MYA-826 / Pb01) OX=502779 GN=PAAG_02396 PE=3 SV=2
C1GT91	-1.0648	0.263297	1306	0.00077459	0.00072745	Ran GTPase-activating protein OS=Paracoccidioides lutzii (strain ATCC MYA-826 / Pb01) OX=502779 GN=PAAG_01736 PE=4 SV=1
C1H507	-1.06457	0.18146	1650	0.000346523	0.000325506	Reduced viability upon starvation protein OS=Paracoccidioides lutzii (strain ATCC MYA-826 / Pb01) OX=502779 GN=PAAG_05848 PE=4 SV=1
C1H7F3	-1.06456	0.269297	2177	0.000290828	0.000273192	DNA-directed RNA polymerase II 13.3 kDa polypeptide OS=Paracoccidioides lutzii (strain ATCC MYA-826 / Pb01) OX=502779 GN=PAAG_06694 PE=4 SV=2
C1GYR2	-1.06454	0.0421	515	0.00291029	0.00273385	Mitochondrial peroxiredoxin PRX1 OS=Paracoccidioides lutzii (strain ATCC MYA-826 / Pb01) OX=502779 GN=PAAG_03216 PE=4 SV=1
A0A0A2V3G4	-1.06451	0.317689	121	0.00037481	0.000352097	T-complex protein 1 subunit zeta OS=Paracoccidioides lutzii (strain ATCC MYA-826 / Pb01) OX=502779 GN=PAAG_12392 PE=3 SV=1
C1GQT0	-1.0644	0.119816	317	0.000969996	0.000911306	ARP2/3 actin-organizing complex subunit Sop2 OS=Paracoccidioides lutzii (strain ATCC MYA-826 / Pb01) OX=502779 GN=PAAG_00875 PE=4 SV=2
C1H588	-1.06425	0.0849146	676	0.00191098	0.00179562	Sulfate adenylyltransferase OS=Paracoccidioides lutzii (strain ATCC MYA-826 / Pb01) OX=502779 GN=MET3 PE=3 SV=1
C1HC24	-1.06418	0.341504	1354	0.000236148	0.000221906	Uncharacterized protein OS=Paracoccidioides lutzii (strain ATCC MYA-826 / Pb01) OX=502779 GN=PAAG_08315 PE=4 SV=1
C1H6S3	-1.06384	0.335172	1345	0.000427999	0.000402314	Uncharacterized protein OS=Paracoccidioides lutzii (strain ATCC MYA-826 / Pb01) OX=502779 GN=PAAG_06464 PE=4 SV=1
C1H308	-1.06379	0.0718938	22	0.00142738	0.00134178	ATP-citrate-lyase OS=Paracoccidioides lutzii (strain ATCC MYA-826 / Pb01) OX=502779 GN=PAAG_05151 PE=4 SV=1
C1H8W7	-1.06374	0.370849	2061	0.000139274	0.000130928	Mitochondrial protein Fmp25 OS=Paracoccidioides lutzii (strain ATCC MYA-826 / Pb01) OX=502779 GN=PAAG_07208 PE=4 SV=1
C1GT86	-1.06373	0.343683	1337	0.00018094	0.0001701	Uncharacterized protein OS=Paracoccidioides lutzii (strain ATCC MYA-826 / Pb01) OX=502779 GN=PAAG_01731 PE=4 SV=1
C1H4E5	-1.06351	0.405554	111	0.000261371	0.000245764	F-actin-capping protein subunit beta OS=Paracoccidioides lutzii (strain ATCC MYA-826 / Pb01) OX=502779 GN=PAAG_05638 PE=3 SV=1
C1GQ43	-1.06337	0.261765	1656	0.000346691	0.000326029	Uncharacterized protein OS=Paracoccidioides lutzii (strain ATCC MYA-826 / Pb01) OX=502779 GN=PAAG_00638 PE=4 SV=1
C1GUW4	-1.06316	0.317717	983	0.000773772	0.000727803	U2 small nuclear ribonucleoprotein B OS=Paracoccidioides lutzii (strain ATCC MYA-826 / Pb01) OX=502779 GN=PAAG_02437 PE=4 SV=1
C1H6B8	-1.06298	0.124035	1291	0.000692728	0.000651686	Enoyl-CoA hydratase OS=Paracoccidioides lutzii (strain ATCC MYA-826 / Pb01) OX=502779 GN=PAAG_06309 PE=3 SV=2
C1H851	-1.0629	0.167329	309	0.000955505	0.000898963	Histidyl-tRNA synthetase OS=Paracoccidioides lutzii (strain ATCC MYA-826 / Pb01) OX=502779 GN=PAAG_07028 PE=3 SV=2
C1GWC8	-1.06286	0.148296	1969	0.00069249	0.000651536	Small glutamine-rich tetratricopeptide repeat-containing protein OS=Paracoccidioides lutzii (strain ATCC MYA-826 / Pb01) OX=502779 GN=PAAG_02823 PE=4 SV=1
C1GYK7	-1.06275	0.261412	331	0.000471823	0.000443965	GTP-binding protein ypt5 OS=Paracoccidioides lutzii (strain ATCC MYA-826 / Pb01) OX=502779 GN=PAAG_03161 PE=4 SV=2
C1H9T8	-1.06259	0.259078	112	0.00042825	0.000403025	Orotidine 5'-phosphate decarboxylase OS=Paracoccidioides lutzii (strain ATCC MYA-826 / Pb01) OX=502779 GN=PAAG_07529 PE=3 SV=2
C1GZ39	-1.06249	0.358393	470	0.000138676	0.00013052	GAF domain nucleotide-binding protein OS=Paracoccidioides lutzii (strain ATCC MYA-826 / Pb01) OX=502779 GN=PAAG_03783 PE=4 SV=2
C1H087	-1.06208	0.239537	337	0.000898137	0.000845641	Sorbitol utilization protein SOU2 OS=Paracoccidioides lutzii (strain ATCC MYA-826 / Pb01) OX=502779 GN=PAAG_04181 PE=4 SV=1
C1HCH6	-1.06192	0.377011	1658	0.000289323	0.000272452	Histone deacetylase OS=Paracoccidioides lutzii (strain ATCC MYA-826 / Pb01) OX=502779 GN=PAAG_08467 PE=3 SV=2
C1HAN5	-1.06189	0.314177	2272	0.00159342	0.00150055	Glutamate dehydrogenase OS=Paracoccidioides lutzii (strain ATCC MYA-826 / Pb01) OX=502779 GN=PAAG_07689 PE=3 SV=2
C1GQS9	-1.0618	0.355242	1731	0.000166657	0.000156958	RNA binding domain-containing protein OS=Paracoccidioides lutzii (strain ATCC MYA-826 / Pb01) OX=502779 GN=PAAG_00874 PE=4 SV=1
C1H070	-1.06153	0.251735	329	0.000775219	0.000730285	Superoxide dismutase OS=Paracoccidioides lutzii (strain ATCC MYA-826 / Pb01) OX=502779 GN=PAAG_04164 PE=4 SV=2
C1H297	-1.06148	0.312089	1357	0.000415123	0.000391078	Pirin OS=Paracoccidioides lutzii (strain ATCC MYA-826 / Pb01) OX=502779 GN=PAAG_04726 PE=3 SV=2
C1H4U0	-1.0613	0.26875	720	0.000802729	0.000756367	2,5-diketo-D-gluconic acid reductase A OS=Paracoccidioides lutzii (strain ATCC MYA-826 / Pb01) OX=502779 GN=PAAG_05780 PE=4 SV=2
Q96UH7	-1.06098	0.165983	685	0.00260695	0.00245711	Fructose-bisphosphate aldolase 1 OS=Paracoccidioides lutzii (strain ATCC MYA-826 / Pb01) OX=502779 GN=FBA1 PE=1 SV=3
C1H9X3	-1.06078	0.258671	1599	0.000970135	0.000914547	ADP-ribosylation factor OS=Paracoccidioides lutzii (strain ATCC MYA-826 / Pb01) OX=502779 GN=PAAG_07702 PE=3 SV=1
C1H515	-1.06064	0.0133463	1712	6.93382e-05	6.53741e-05	Uncharacterized protein OS=Paracoccidioides lutzii (strain ATCC MYA-826 / Pb01) OX=502779 GN=PAAG_05856 PE=4 SV=1
C1GUQ7	-1.06061	0.408462	474	0.000179142	0.000168904	mRNA cleavage and polyadenylation factor CLP1 OS=Paracoccidioides lutzii (strain ATCC MYA-826 / Pb01) OX=502779 GN=CLP1 PE=3 SV=1
C1H648	-1.06033	0.015318	660	6.93382e-05	6.5393e-05	MADS box transcription factor Mcm1 OS=Paracoccidioides lutzii (strain ATCC MYA-826 / Pb01) OX=502779 GN=PAAG_06158 PE=4 SV=2
C1H9K3	-1.06025	0.293619	1400	0.000249372	0.000235201	Chaperone protein dnaK OS=Paracoccidioides lutzii (strain ATCC MYA-826 / Pb01) OX=502779 GN=PAAG_07444 PE=3 SV=1
C1GUN0	-1.06017	0.370167	785	0.000289253	0.000272837	Uncharacterized protein OS=Paracoccidioides lutzii (strain ATCC MYA-826 / Pb01) OX=502779 GN=PAAG_02353 PE=3 SV=2
C1GQZ0	-1.06006	0.336049	2230	0.00015229	0.000143662	Protein phosphatase 1 regulatory subunit SDS22 OS=Paracoccidioides lutzii (strain ATCC MYA-826 / Pb01) OX=502779 GN=PAAG_00935 PE=4 SV=2
C1H3V0	-1.05993	0.334358	2011	0.000234435	0.000221181	Uncharacterized protein OS=Paracoccidioides lutzii (strain ATCC MYA-826 / Pb01) OX=502779 GN=PAAG_05443 PE=4 SV=1
C1H858	-1.05932	0.346656	104	0.000358521	0.000338446	Uncharacterized protein OS=Paracoccidioides lutzii (strain ATCC MYA-826 / Pb01) OX=502779 GN=PAAG_07035 PE=4 SV=1
C1GW58	-1.05905	0.393551	157	0.000259654	0.000245177	Uncharacterized protein OS=Paracoccidioides lutzii (strain ATCC MYA-826 / Pb01) OX=502779 GN=PAAG_02753 PE=4 SV=2
C1GWA3	-1.05899	0.335909	658	0.000152137	0.000143662	HLH transcription factor (GlcD gamma) OS=Paracoccidioides lutzii (strain ATCC MYA-826 / Pb01) OX=502779 GN=PAAG_02798 PE=4 SV=1
C1GW37	-1.05888	0.109805	1910	0.00262166	0.00247588	2-oxoglutarate dehydrogenase E1 OS=Paracoccidioides lutzii (strain ATCC MYA-826 / Pb01) OX=502779 GN=PAAG_02732 PE=4 SV=1
C1HAD0	-1.05879	0.0243711	220	6.89287e-05	6.51013e-05	Uncharacterized protein OS=Paracoccidioides lutzii (strain ATCC MYA-826 / Pb01) OX=502779 GN=PAAG_07584 PE=4 SV=2
C1GQV6	-1.05862	0.379433	648	0.000179533	0.000169592	Prenylated Rab acceptor 1 OS=Paracoccidioides lutzii (strain ATCC MYA-826 / Pb01) OX=502779 GN=PAAG_00901 PE=4 SV=2
C1GR06	-1.05861	0.385816	836	0.000165766	0.000156588	COP9 signalosome complex subunit 12 OS=Paracoccidioides lutzii (strain ATCC MYA-826 / Pb01) OX=502779 GN=PAAG_00951 PE=4 SV=1
C1HBD5	-1.05778	0.409097	1331	0.000290119	0.000274273	Uncharacterized protein OS=Paracoccidioides lutzii (strain ATCC MYA-826 / Pb01) OX=502779 GN=PAAG_08076 PE=4 SV=2
C1GTE0	-1.05738	0.0870294	1267	0.00189848	0.00179546	40S ribosomal protein S3 OS=Paracoccidioides lutzii (strain ATCC MYA-826 / Pb01) OX=502779 GN=PAAG_01785 PE=3 SV=1
C1H0Y1	-1.05685	0.408919	932	0.000689764	0.000652663	60S ribosomal protein L22 OS=Paracoccidioides lutzii (strain ATCC MYA-826 / Pb01) OX=502779 GN=PAAG_04425 PE=4 SV=2
C1GPH2	-1.0565	0.148026	931	0.00162273	0.00153595	Succinate--CoA ligase [ADP-forming] subunit alpha, mitochondrial OS=Paracoccidioides lutzii (strain ATCC MYA-826 / Pb01) OX=502779 GN=PAAG_00417 PE=3 SV=1
C1GNJ3	-1.05647	0.163213	1916	0.00162249	0.00153577	60S ribosomal protein L3 OS=Paracoccidioides lutzii (strain ATCC MYA-826 / Pb01) OX=502779 GN=PAAG_00088 PE=3 SV=2
C1GNN1	-1.05622	0.0467037	929	6.90696e-05	6.5393e-05	Histone H4 OS=Paracoccidioides lutzii (strain ATCC MYA-826 / Pb01) OX=502779 GN=PAAG_00126 PE=3 SV=2
C1GWE6	-1.05589	0.413088	1444	8.29519e-05	7.85611e-05	Uncharacterized protein OS=Paracoccidioides lutzii (strain ATCC MYA-826 / Pb01) OX=502779 GN=PAAG_02841 PE=4 SV=1
C1GWP0	-1.05489	0.436693	236	0.000179394	0.000170059	Glycine cleavage system H protein OS=Paracoccidioides lutzii (strain ATCC MYA-826 / Pb01) OX=502779 GN=PAAG_02935 PE=3 SV=1
C1GPV0	-1.05449	0.16252	4	0.00512689	0.00486198	Alpha-1,4 glucan phosphorylase OS=Paracoccidioides lutzii (strain ATCC MYA-826 / Pb01) OX=502779 GN=PAAG_00545 PE=3 SV=2
C1GP45	-1.05426	0.366916	175	0.000152959	0.000145087	Oligosaccharyltransferase OS=Paracoccidioides lutzii (strain ATCC MYA-826 / Pb01) OX=502779 GN=PAAG_00290 PE=4 SV=2
C1HAP4	-1.05396	0.429891	666	8.66542e-05	8.22178e-05	40S ribosomal protein mrp4 OS=Paracoccidioides lutzii (strain ATCC MYA-826 / Pb01) OX=502779 GN=PAAG_07873 PE=3 SV=2
C1GQC3	-1.05365	0.38926	844	0.000179226	0.0001701	Mevalonate kinase OS=Paracoccidioides lutzii (strain ATCC MYA-826 / Pb01) OX=502779 GN=PAAG_00718 PE=3 SV=2
C1GY16	-1.05337	0.244997	1252	0.00105362	0.00100023	Uncharacterized protein OS=Paracoccidioides lutzii (strain ATCC MYA-826 / Pb01) OX=502779 GN=PAAG_03299 PE=4 SV=2
C1HE11	-1.05335	0.148593	8	0.00257664	0.00244613	Aminopeptidase OS=Paracoccidioides lutzii (strain ATCC MYA-826 / Pb01) OX=502779 GN=PAAG_09004 PE=3 SV=2
A0A0A2V213	-1.05328	0.275222	2171	0.000998312	0.000947817	Uncharacterized protein OS=Paracoccidioides lutzii (strain ATCC MYA-826 / Pb01) OX=502779 GN=PAAG_11406 PE=3 SV=1
C1H8K7	-1.05289	0.0126799	753	6.93382e-05	6.58554e-05	Histone H4 OS=Paracoccidioides lutzii (strain ATCC MYA-826 / Pb01) OX=502779 GN=PAAG_07098 PE=3 SV=2; Additional IDs concatenated into MaxParsimony group: C1GNN1
C1H0A6	-1.05289	0.0126799	1732	6.93382e-05	6.58554e-05	Long chronological lifespan protein 2 OS=Paracoccidioides lutzii (strain ATCC MYA-826 / Pb01) OX=502779 GN=LCL2 PE=3 SV=1
C1HBR4	-1.05272	0.273915	732	0.000875838	0.000831978	26S proteasome non-ATPase regulatory subunit 6 OS=Paracoccidioides lutzii (strain ATCC MYA-826 / Pb01) OX=502779 GN=PAAG_08205 PE=4 SV=1
C1GUB6	-1.05107	0.219031	550	0.00106854	0.00101662	40S ribosomal protein S0 OS=Paracoccidioides lutzii (strain ATCC MYA-826 / Pb01) OX=502779 GN=RPS0 PE=3 SV=1
C1HDX3	-1.05077	0.279504	1925	0.00119213	0.00113453	NADH-ubiquinone oxidoreductase 78 kDa subunit OS=Paracoccidioides lutzii (strain ATCC MYA-826 / Pb01) OX=502779 GN=PAAG_08966 PE=4 SV=2
C1HB97	-1.0506	0.263514	12	0.00170482	0.00162271	1,4-alpha-glucan-branching enzyme OS=Paracoccidioides lutzii (strain ATCC MYA-826 / Pb01) OX=502779 GN=PAAG_08038 PE=4 SV=2
C1GWN7	-1.04997	0.0542538	1158	6.89287e-05	6.56485e-05	NADH2 dehydrogenase 14K chain OS=Paracoccidioides lutzii (strain ATCC MYA-826 / Pb01) OX=502779 GN=PAAG_02932 PE=4 SV=1
C1GWJ3	-1.04898	0.403376	1780	0.000157547	0.000150191	Golgi SNAP receptor complex member 1 OS=Paracoccidioides lutzii (strain ATCC MYA-826 / Pb01) OX=502779 GN=PAAG_02888 PE=3 SV=1
C1H8C1	-1.04892	0.22024	963	0.00102341	0.000975682	KH domain RNA-binding protein OS=Paracoccidioides lutzii (strain ATCC MYA-826 / Pb01) OX=502779 GN=PAAG_06917 PE=4 SV=1
C1H2W4	-1.04839	0.360703	1021	0.000720426	0.000687171	AAA ATPase OS=Paracoccidioides lutzii (strain ATCC MYA-826 / Pb01) OX=502779 GN=PAAG_05107 PE=3 SV=1
C1HBR6	-1.04704	0.438139	119	0.000229643	0.000219326	Alanine aminotransferase OS=Paracoccidioides lutzii (strain ATCC MYA-826 / Pb01) OX=502779 GN=PAAG_08207 PE=4 SV=1
C1H7S6	-1.04617	0.15326	958	0.001595	0.0015246	UTP--glucose-1-phosphate uridylyltransferase OS=Paracoccidioides lutzii (strain ATCC MYA-826 / Pb01) OX=502779 GN=PAAG_06817 PE=3 SV=2
C1GUQ4	-1.04598	0.295366	1575	0.000708055	0.000676927	Rho GDP-dissociation inhibitor OS=Paracoccidioides lutzii (strain ATCC MYA-826 / Pb01) OX=502779 GN=PAAG_02377 PE=4 SV=2
C1GR96	-1.04545	0.345134	319	0.000734208	0.000702287	Prohibitin-2 OS=Paracoccidioides lutzii (strain ATCC MYA-826 / Pb01) OX=502779 GN=PAAG_01041 PE=4 SV=1
C1H425	-1.04461	0.208216	514	0.00339324	0.00324834	Cell division cycle protein OS=Paracoccidioides lutzii (strain ATCC MYA-826 / Pb01) OX=502779 GN=PAAG_05518 PE=3 SV=1
C1GPB0	-1.04368	0.0240218	1386	6.87323e-05	6.58554e-05	Uncharacterized protein OS=Paracoccidioides lutzii (strain ATCC MYA-826 / Pb01) OX=502779 GN=PAAG_00355 PE=4 SV=1
C1GTM5	-1.04285	0.292566	1013	0.000609706	0.000584652	Uncharacterized protein OS=Paracoccidioides lutzii (strain ATCC MYA-826 / Pb01) OX=502779 GN=PAAG_01870 PE=3 SV=1
C1H4R8	-1.04279	0.340837	2294	0.000651688	0.000624945	Glutamate carboxypeptidase OS=Paracoccidioides lutzii (strain ATCC MYA-826 / Pb01) OX=502779 GN=PAAG_05758 PE=4 SV=1
C1GWZ9	-1.04227	0.265424	768	0.000568166	0.000545124	Phosphoglycerate mutase family protein OS=Paracoccidioides lutzii (strain ATCC MYA-826 / Pb01) OX=502779 GN=PAAG_03373 PE=4 SV=2
C1GZZ7	-1.04205	0.0367898	1112	6.78386e-05	6.51013e-05	Uncharacterized protein OS=Paracoccidioides lutzii (strain ATCC MYA-826 / Pb01) OX=502779 GN=PAAG_04091 PE=4 SV=2
C1H3X5	-1.03995	0.375469	1684	0.000235758	0.000226702	Translocation protein sec63 OS=Paracoccidioides lutzii (strain ATCC MYA-826 / Pb01) OX=502779 GN=PAAG_05468 PE=4 SV=1
C1H742	-1.03984	0.192812	1565	0.000595255	0.000572452	60S ribosomal export protein NMD3 OS=Paracoccidioides lutzii (strain ATCC MYA-826 / Pb01) OX=502779 GN=PAAG_06583 PE=3 SV=1
C1GTD2	-1.03924	0.214608	1908	0.00343298	0.00330336	Alanine--tRNA ligase OS=Paracoccidioides lutzii (strain ATCC MYA-826 / Pb01) OX=502779 GN=ALA1 PE=3 SV=2
C1H9A8	-1.03698	0.346698	1614	0.00114975	0.00110875	Glycyl-tRNA synthetase OS=Paracoccidioides lutzii (strain ATCC MYA-826 / Pb01) OX=502779 GN=PAAG_07349 PE=4 SV=1
C1HBE7	-1.03593	0.235804	1261	0.000970065	0.000936419	Cytochrome b-c1 complex subunit 2 OS=Paracoccidioides lutzii (strain ATCC MYA-826 / Pb01) OX=502779 GN=PAAG_08088 PE=4 SV=1
C1H5B9	-1.035	0.299639	1286	0.00134613	0.00130061	NIPSNAP family protein OS=Paracoccidioides lutzii (strain ATCC MYA-826 / Pb01) OX=502779 GN=PAAG_05960 PE=4 SV=1
C1GZU8	-1.03484	0.390991	1867	0.000431203	0.000416687	Sporulation-regulated protein OS=Paracoccidioides lutzii (strain ATCC MYA-826 / Pb01) OX=502779 GN=PAAG_04042 PE=3 SV=2
C1GW30	-1.03462	0.297181	534	0.00142814	0.00138036	Superoxide dismutase OS=Paracoccidioides lutzii (strain ATCC MYA-826 / Pb01) OX=502779 GN=PAAG_02725 PE=3 SV=1
C1H2B3	-1.03409	0.323748	955	0.00192426	0.00186083	Valyl-tRNA synthetase OS=Paracoccidioides lutzii (strain ATCC MYA-826 / Pb01) OX=502779 GN=PAAG_04742 PE=3 SV=1
C1GRD3	-1.03352	0.335119	1868	0.000443857	0.000429462	Alternative oxidase OS=Paracoccidioides lutzii (strain ATCC MYA-826 / Pb01) OX=502779 GN=PAAG_01078 PE=3 SV=1
C1GXQ1	-1.03343	0.318659	2336	0.000429712	0.000415812	3-oxoacyl-[acyl-carrier-protein] reductase OS=Paracoccidioides lutzii (strain ATCC MYA-826 / Pb01) OX=502779 GN=PAAG_03625 PE=4 SV=2
C1GW73	-1.03334	0.440955	247	0.000152122	0.000147214	Uncharacterized protein OS=Paracoccidioides lutzii (strain ATCC MYA-826 / Pb01) OX=502779 GN=PAAG_02768 PE=4 SV=1
C1H2H0	-1.03309	0.422858	734	0.000486705	0.000471116	Oleate-induced peroxisomal protein OS=Paracoccidioides lutzii (strain ATCC MYA-826 / Pb01) OX=502779 GN=PAAG_04963 PE=4 SV=1
C1H4L1	-1.033	0.386012	1628	0.000457331	0.000442719	40S ribosomal protein S13-1 OS=Paracoccidioides lutzii (strain ATCC MYA-826 / Pb01) OX=502779 GN=PAAG_05704 PE=3 SV=1
C1H971	-1.0323	0.280546	2291	0.00128911	0.00124877	CTP synthase OS=Paracoccidioides lutzii (strain ATCC MYA-826 / Pb01) OX=502779 GN=PAAG_07312 PE=3 SV=1
C1GY76	-1.03219	0.396264	749	0.000513333	0.000497322	Splicing factor U2AF-associated protein OS=Paracoccidioides lutzii (strain ATCC MYA-826 / Pb01) OX=502779 GN=PAAG_03030 PE=4 SV=2
C1GUC1	-1.03168	0.387806	79	0.000844098	0.000818175	Hsp70 OS=Paracoccidioides lutzii (strain ATCC MYA-826 / Pb01) OX=502779 GN=PAAG_02116 PE=3 SV=2
C1GUK6	-1.03136	0.389193	86	0.00045591	0.000442047	U2 small nuclear ribonucleoprotein A OS=Paracoccidioides lutzii (strain ATCC MYA-826 / Pb01) OX=502779 GN=PAAG_02329 PE=4 SV=2
C1GSH8	-1.03109	0.450844	1762	0.00018101	0.000175551	Outer membrane protein OS=Paracoccidioides lutzii (strain ATCC MYA-826 / Pb01) OX=502779 GN=PAAG_01473 PE=4 SV=2
C1H7F9	-1.03106	0.421303	1641	0.000374449	0.000363168	Uridylate kinase OS=Paracoccidioides lutzii (strain ATCC MYA-826 / Pb01) OX=502779 GN=PAAG_06700 PE=3 SV=1
A0A0A2V3R5	-1.03085	0.345657	2314	0.000789879	0.000766242	Uncharacterized protein OS=Paracoccidioides lutzii (strain ATCC MYA-826 / Pb01) OX=502779 GN=PAAG_12545 PE=4 SV=1
C1H7T4	-1.03004	0.402075	366	0.000456649	0.00044333	Fatty-acid amide hydrolase OS=Paracoccidioides lutzii (strain ATCC MYA-826 / Pb01) OX=502779 GN=PAAG_06825 PE=4 SV=2
C1H261	-1.02975	0.398971	356	0.000389441	0.000378191	Uncharacterized protein OS=Paracoccidioides lutzii (strain ATCC MYA-826 / Pb01) OX=502779 GN=PAAG_04691 PE=3 SV=1
C1HA57	-1.02917	0.270611	1253	0.0011779	0.00114451	Acetyl-CoA acetyltransferase OS=Paracoccidioides lutzii (strain ATCC MYA-826 / Pb01) OX=502779 GN=PAAG_07786 PE=3 SV=1
C1GYK9	-1.02909	0.455618	2095	0.000228205	0.000221753	Glycylpeptide N-tetradecanoyltransferase OS=Paracoccidioides lutzii (strain ATCC MYA-826 / Pb01) OX=502779 GN=PAAG_03163 PE=3 SV=2
C1H390	-1.02874	0.395894	1606	0.00089981	0.000874673	60S ribosomal protein L26 OS=Paracoccidioides lutzii (strain ATCC MYA-826 / Pb01) OX=502779 GN=PAAG_05233 PE=4 SV=2
C1GQI7	-1.02788	0.408013	1964	0.000692936	0.000674143	Small COPII coat GTPase sar1 OS=Paracoccidioides lutzii (strain ATCC MYA-826 / Pb01) OX=502779 GN=PAAG_00782 PE=3 SV=1
C1H696	-1.02781	0.419512	1042	0.00034736	0.000337961	ATP synthase subunit 5 OS=Paracoccidioides lutzii (strain ATCC MYA-826 / Pb01) OX=502779 GN=PAAG_06206 PE=3 SV=1
C1GQD1	-1.02705	0.315536	1264	0.00397761	0.00387283	Pyruvate carboxylase OS=Paracoccidioides lutzii (strain ATCC MYA-826 / Pb01) OX=502779 GN=PAAG_00726 PE=4 SV=1
C1GPI8	-1.02689	0.418444	1568	0.000805319	0.000784229	Adenosine kinase OS=Paracoccidioides lutzii (strain ATCC MYA-826 / Pb01) OX=502779 GN=PAAG_00433 PE=4 SV=2
C1HAR1	-1.02671	0.426177	2006	0.000400883	0.000390455	Vacuolar-sorting protein snf7 OS=Paracoccidioides lutzii (strain ATCC MYA-826 / Pb01) OX=502779 GN=PAAG_07890 PE=4 SV=1
C1H5L6	-1.02602	0.397277	1898	0.000333062	0.000324616	Uncharacterized protein OS=Paracoccidioides lutzii (strain ATCC MYA-826 / Pb01) OX=502779 GN=PAAG_06057 PE=4 SV=2
C1H5X4	-1.02534	0.394435	38	0.00142605	0.00139081	Eukaryotic translation initiation factor 3 subunit B OS=Paracoccidioides lutzii (strain ATCC MYA-826 / Pb01) OX=502779 GN=PRT1 PE=3 SV=1
C1H6Y5	-1.0252	0.300362	529	0.00169334	0.00165172	Glucose-6-phosphate isomerase OS=Paracoccidioides lutzii (strain ATCC MYA-826 / Pb01) OX=502779 GN=PAAG_06526 PE=3 SV=1
C1GUJ4	-1.0248	0.452075	114	0.000305221	0.000297835	Class II Aldolase family protein OS=Paracoccidioides lutzii (strain ATCC MYA-826 / Pb01) OX=502779 GN=PAAG_02189 PE=4 SV=1
C1H098	-1.02244	0.47748	1143	0.000116958	0.000114391	Uncharacterized protein OS=Paracoccidioides lutzii (strain ATCC MYA-826 / Pb01) OX=502779 GN=PAAG_04192 PE=4 SV=1
C1GT80	-1.02216	0.381079	511	0.00165022	0.00161445	Succinate dehydrogenase [ubiquinone] flavoprotein subunit, mitochondrial OS=Paracoccidioides lutzii (strain ATCC MYA-826 / Pb01) OX=502779 GN=PAAG_01725 PE=3 SV=2
C1H2I1	-1.02204	0.377753	42	0.000982689	0.000961496	Adenylosuccinate lyase OS=Paracoccidioides lutzii (strain ATCC MYA-826 / Pb01) OX=502779 GN=PAAG_04974 PE=3 SV=1
C1GWC2	-1.02192	0.432826	93	0.000694705	0.000679801	Stomatin family protein OS=Paracoccidioides lutzii (strain ATCC MYA-826 / Pb01) OX=502779 GN=PAAG_02817 PE=4 SV=1
C1HA44	-1.02104	0.23809	1945	0.000651133	0.000637718	Cyclin-dependent kinases regulatory subunit OS=Paracoccidioides lutzii (strain ATCC MYA-826 / Pb01) OX=502779 GN=PAAG_07773 PE=3 SV=1
C1H7W0	-1.02076	0.43756	1681	0.000360472	0.00035314	Uncharacterized protein OS=Paracoccidioides lutzii (strain ATCC MYA-826 / Pb01) OX=502779 GN=PAAG_06851 PE=4 SV=1
C1GX30	-1.02058	0.402041	1295	0.000887015	0.000869129	Ketol-acid reductoisomerase OS=Paracoccidioides lutzii (strain ATCC MYA-826 / Pb01) OX=502779 GN=PAAG_03404 PE=3 SV=1
C1GPN3	-1.01931	0.450763	1899	0.000360152	0.000353331	DnaJ domain protein Psi OS=Paracoccidioides lutzii (strain ATCC MYA-826 / Pb01) OX=502779 GN=PAAG_00478 PE=4 SV=1
C1GR86	-1.01889	0.475824	893	8.64629e-05	8.48601e-05	Uncharacterized protein OS=Paracoccidioides lutzii (strain ATCC MYA-826 / Pb01) OX=502779 GN=PAAG_01031 PE=4 SV=1
C1GZF6	-1.01861	0.463836	1027	0.00029169	0.00028636	GTP-binding protein YPT52 OS=Paracoccidioides lutzii (strain ATCC MYA-826 / Pb01) OX=502779 GN=PAAG_03900 PE=4 SV=1
C1H6L2	-1.01844	0.430678	1378	0.000318863	0.000313089	ATP-binding cassette sub-family G member 2 OS=Paracoccidioides lutzii (strain ATCC MYA-826 / Pb01) OX=502779 GN=PAAG_06403 PE=4 SV=1
C1GZS1	-1.01785	0.472393	1759	0.000105449	0.0001036	Uncharacterized protein OS=Paracoccidioides lutzii (strain ATCC MYA-826 / Pb01) OX=502779 GN=PAAG_04015 PE=4 SV=2
C1H181	-1.01784	0.423273	744	0.000581795	0.0005716	Glutamine synthetase OS=Paracoccidioides lutzii (strain ATCC MYA-826 / Pb01) OX=502779 GN=PAAG_04525 PE=3 SV=1
C1HDL8	-1.01765	0.402302	541	0.00140325	0.00137891	Histone acetyltransferase type B subunit 2 OS=Paracoccidioides lutzii (strain ATCC MYA-826 / Pb01) OX=502779 GN=PAAG_08875 PE=4 SV=2
C1GSM9	-1.01696	0.253223	1263	0.00887234	0.00872437	Fatty acid synthase subunit beta dehydratase OS=Paracoccidioides lutzii (strain ATCC MYA-826 / Pb01) OX=502779 GN=PAAG_01524 PE=3 SV=1
C1GSE0	-1.01646	0.435932	1256	0.00083274	0.000819256	40S ribosomal protein S16 OS=Paracoccidioides lutzii (strain ATCC MYA-826 / Pb01) OX=502779 GN=PAAG_01435 PE=3 SV=1
C1H645	-1.0162	0.402694	993	0.000581893	0.000572616	Vacuolar ATP synthase subunit E OS=Paracoccidioides lutzii (strain ATCC MYA-826 / Pb01) OX=502779 GN=PAAG_06155 PE=3 SV=1
C1H217	-1.01597	0.462497	1384	0.000290868	0.000286296	Reduced viability upon starvation protein OS=Paracoccidioides lutzii (strain ATCC MYA-826 / Pb01) OX=502779 GN=PAAG_04953 PE=4 SV=2
C1GSE2	-1.01565	0.41018	971	0.000887797	0.000874115	Uricase OS=Paracoccidioides lutzii (strain ATCC MYA-826 / Pb01) OX=502779 GN=PAAG_01437 PE=3 SV=1
C1H8B2	-1.01477	0.462832	1954	0.000569212	0.000560927	Homocitrate synthase OS=Paracoccidioides lutzii (strain ATCC MYA-826 / Pb01) OX=502779 GN=PAAG_07089 PE=3 SV=2
C1GRX7	-1.01418	0.464344	2197	0.000291065	0.000286996	F-actin-capping protein subunit alpha OS=Paracoccidioides lutzii (strain ATCC MYA-826 / Pb01) OX=502779 GN=PAAG_01272 PE=3 SV=2
C1GWA1	-1.01383	0.476102	770	0.00029073	0.000286764	Mitochondrial 2-oxodicarboxylate carrier 1 OS=Paracoccidioides lutzii (strain ATCC MYA-826 / Pb01) OX=502779 GN=PAAG_02796 PE=3 SV=2
C1GQH0	-1.01368	0.447259	1654	0.000318056	0.000313762	60S ribosomal protein L36 OS=Paracoccidioides lutzii (strain ATCC MYA-826 / Pb01) OX=502779 GN=PAAG_00765 PE=3 SV=2
C1GYI3	-1.01338	0.443069	762	0.00051414	0.00050735	Vacuolar protein sorting-associated protein 29 OS=Paracoccidioides lutzii (strain ATCC MYA-826 / Pb01) OX=502779 GN=PAAG_03137 PE=3 SV=1
C1H152	-1.01332	0.41914	1591	0.00143864	0.00141974	Nascent polypeptide-associated complex subunit beta OS=Paracoccidioides lutzii (strain ATCC MYA-826 / Pb01) OX=502779 GN=PAAG_04496 PE=3 SV=2
C1H9Q9	-1.01319	0.43324	544	0.00106617	0.0010523	Probable Xaa-Pro aminopeptidase PEPP OS=Paracoccidioides lutzii (strain ATCC MYA-826 / Pb01) OX=502779 GN=PEPP PE=3 SV=1
C1GXD9	-1.01311	0.434291	2305	0.000870729	0.000859459	40S ribosomal protein S18 OS=Paracoccidioides lutzii (strain ATCC MYA-826 / Pb01) OX=502779 GN=PAAG_03513 PE=3 SV=1
A0A0A2V582	-1.01311	0.479353	467	0.00023541	0.000232364	YbgI/family dinuclear metal center protein OS=Paracoccidioides lutzii (strain ATCC MYA-826 / Pb01) OX=502779 GN=PAAG_11982 PE=4 SV=1
C1GW78	-1.01259	0.46008	821	0.000277353	0.000273903	Ubiquitin-conjugating enzyme variant MMS2 OS=Paracoccidioides lutzii (strain ATCC MYA-826 / Pb01) OX=502779 GN=PAAG_02773 PE=4 SV=2
C1GVD4	-1.01134	0.476434	1181	0.000153029	0.000151312	Uncharacterized protein OS=Paracoccidioides lutzii (strain ATCC MYA-826 / Pb01) OX=502779 GN=PAAG_02211 PE=4 SV=2
C1GTV2	-1.01109	0.396728	77	0.00052607	0.000520302	ATPase GET3 OS=Paracoccidioides lutzii (strain ATCC MYA-826 / Pb01) OX=502779 GN=GET3 PE=3 SV=1
C1HB78	-1.0109	0.464728	1635	0.00049976	0.000494373	Adenylate kinase OS=Paracoccidioides lutzii (strain ATCC MYA-826 / Pb01) OX=502779 GN=ADK1 PE=3 SV=1
C1GZ72	-1.01025	0.446426	1274	0.00133124	0.00131774	40S ribosomal protein S4 OS=Paracoccidioides lutzii (strain ATCC MYA-826 / Pb01) OX=502779 GN=PAAG_03816 PE=3 SV=1
C1HE91	-1.01009	0.454414	24	0.00131558	0.00130243	TCTP family protein OS=Paracoccidioides lutzii (strain ATCC MYA-826 / Pb01) OX=502779 GN=PAAG_09083 PE=3 SV=1
C1GUC0	-1.00862	0.457268	1556	0.00091593	0.000908098	Ribose-phosphate pyrophosphokinase OS=Paracoccidioides lutzii (strain ATCC MYA-826 / Pb01) OX=502779 GN=PAAG_02115 PE=4 SV=1
C1H4W4	-1.00853	0.461263	797	0.000249372	0.000247263	40S ribosomal protein S21 OS=Paracoccidioides lutzii (strain ATCC MYA-826 / Pb01) OX=502779 GN=PAAG_05805 PE=3 SV=1
C1GUW8	-1.00852	0.481643	1983	0.000223119	0.000221233	Protein kinase C OS=Paracoccidioides lutzii (strain ATCC MYA-826 / Pb01) OX=502779 GN=PAAG_02441 PE=3 SV=2
C1H1W8	-1.00787	0.490629	1996	0.000235492	0.000233653	ATP-binding cassette sub-family F member 2 OS=Paracoccidioides lutzii (strain ATCC MYA-826 / Pb01) OX=502779 GN=PAAG_04904 PE=4 SV=1
C1GT14	-1.00786	0.47369	807	0.000248886	0.000246945	NADH-ubiquinone oxidoreductase 12 kDa subunit OS=Paracoccidioides lutzii (strain ATCC MYA-826 / Pb01) OX=502779 GN=PAAG_01659 PE=4 SV=1
C1H9V2	-1.00768	0.487403	1410	0.000235074	0.000233283	Tubulin-specific chaperone A OS=Paracoccidioides lutzii (strain ATCC MYA-826 / Pb01) OX=502779 GN=PAAG_07543 PE=3 SV=1
C1H9X8	-1.00725	0.462689	1309	0.000485284	0.000481791	Ribosomal protein OS=Paracoccidioides lutzii (strain ATCC MYA-826 / Pb01) OX=502779 GN=PAAG_07707 PE=3 SV=2
C1GUK2	-1.00697	0.485433	2024	0.0001939	0.000192557	DNA-directed RNA polymerase subunit OS=Paracoccidioides lutzii (strain ATCC MYA-826 / Pb01) OX=502779 GN=PAAG_02197 PE=3 SV=1
C1GVI5	-1.00659	0.487809	1082	0.000221588	0.000220138	Pre-mRNA-splicing factor cef1 OS=Paracoccidioides lutzii (strain ATCC MYA-826 / Pb01) OX=502779 GN=PAAG_02262 PE=4 SV=1
C1GQ62	-1.00654	0.434681	953	0.00167855	0.00166765	Inorganic pyrophosphatase OS=Paracoccidioides lutzii (strain ATCC MYA-826 / Pb01) OX=502779 GN=PAAG_00657 PE=4 SV=2
C1HAF2	-1.00614	0.488084	2183	0.000276058	0.000274373	Uncharacterized protein OS=Paracoccidioides lutzii (strain ATCC MYA-826 / Pb01) OX=502779 GN=PAAG_07606 PE=4 SV=2
C1GV66	-1.0055	0.484956	1344	0.00022245	0.000221233	Uncharacterized protein OS=Paracoccidioides lutzii (strain ATCC MYA-826 / Pb01) OX=502779 GN=PAAG_02539 PE=4 SV=1
C1H8L4	-1.00525	0.474241	523	0.00214191	0.00213072	Isoleucyl-tRNA synthetase OS=Paracoccidioides lutzii (strain ATCC MYA-826 / Pb01) OX=502779 GN=PAAG_07105 PE=3 SV=1
C1GXQ7	-1.00519	0.467681	1588	0.00195081	0.00194073	12-oxophytodienoate reductase OS=Paracoccidioides lutzii (strain ATCC MYA-826 / Pb01) OX=502779 GN=PAAG_03631 PE=4 SV=1
C1HAP6	-1.00377	0.487951	970	0.00074816	0.000745348	Hepatocellular carcinoma down-regulated mitochondrial carrier protein OS=Paracoccidioides lutzii (strain ATCC MYA-826 / Pb01) OX=502779 GN=PAAG_07874 PE=3 SV=2
C1GQ44	-1.0037	0.478524	1963	0.00067836	0.000675858	Phosphate carrier protein OS=Paracoccidioides lutzii (strain ATCC MYA-826 / Pb01) OX=502779 GN=PAAG_00639 PE=3 SV=1
C1GYF9	-1.00237	0.492817	1015	0.000706089	0.000704418	Mitotic control protein dis3 OS=Paracoccidioides lutzii (strain ATCC MYA-826 / Pb01) OX=502779 GN=PAAG_03113 PE=3 SV=2
C1GNV9	-1.00177	0.48921	2261	0.000443034	0.000442249	Ubiquitin-conjugating enzyme OS=Paracoccidioides lutzii (strain ATCC MYA-826 / Pb01) OX=502779 GN=PAAG_00204 PE=3 SV=1
C1GQH7	-1.00124	0.491892	2328	0.000430312	0.00042978	Eukaryotic translation initiation factor 3 subunit J OS=Paracoccidioides lutzii (strain ATCC MYA-826 / Pb01) OX=502779 GN=HCR1 PE=3 SV=1
C1HCM1	1.00016	0.498968	522	0.00170253	0.0017028	Serine hydroxymethyltransferase OS=Paracoccidioides lutzii (strain ATCC MYA-826 / Pb01) OX=502779 GN=PAAG_08512 PE=3 SV=1
C1H1J3	1.00026	0.497772	524	0.0020947	0.00209525	Pre-mRNA-splicing factor rse1 OS=Paracoccidioides lutzii (strain ATCC MYA-826 / Pb01) OX=502779 GN=PAAG_04637 PE=4 SV=1
C1GYX3	1.00029	0.498868	1018	0.00041532	0.000415442	Myosin regulatory light chain cdc4 OS=Paracoccidioides lutzii (strain ATCC MYA-826 / Pb01) OX=502779 GN=PAAG_03717 PE=4 SV=2
C1HBX7	1.00053	0.499028	2208	0.000207459	0.000207568	Uncharacterized protein OS=Paracoccidioides lutzii (strain ATCC MYA-826 / Pb01) OX=502779 GN=PAAG_08268 PE=4 SV=2
C1H3W1	1.00077	0.495431	692	0.0013139	0.00131491	Acyl-CoA dehydrogenase OS=Paracoccidioides lutzii (strain ATCC MYA-826 / Pb01) OX=502779 GN=PAAG_05454 PE=3 SV=1
C1H4P0	1.00087	0.498369	1790	0.000116958	0.00011706	NEDD8-activating enzyme E1 catalytic subunit OS=Paracoccidioides lutzii (strain ATCC MYA-826 / Pb01) OX=502779 GN=PAAG_05733 PE=4 SV=1
C1H2G1	1.00146	0.497118	795	0.000221545	0.000221868	Small nuclear ribonucleoprotein G OS=Paracoccidioides lutzii (strain ATCC MYA-826 / Pb01) OX=502779 GN=PAAG_04790 PE=3 SV=2
C1GSF5	1.00148	0.493709	84	0.000608954	0.000609855	Uncharacterized protein OS=Paracoccidioides lutzii (strain ATCC MYA-826 / Pb01) OX=502779 GN=PAAG_01450 PE=4 SV=1
C1GR42	1.00214	0.494638	369	0.000649824	0.000651213	Uracil-DNA glycosylase OS=Paracoccidioides lutzii (strain ATCC MYA-826 / Pb01) OX=502779 GN=UNG1 PE=3 SV=1
C1HB82	1.0027	0.481685	1255	0.00123132	0.00123465	L-aminoadipate-semialdehyde dehydrogenase large subunit OS=Paracoccidioides lutzii (strain ATCC MYA-826 / Pb01) OX=502779 GN=PAAG_08023 PE=4 SV=1
C1H227	1.00289	0.491206	425	0.000194386	0.000194948	ARP2/3 complex 21 kDa subunit (Fragment) OS=Paracoccidioides lutzii (strain ATCC MYA-826 / Pb01) OX=502779 GN=PAAG_04657 PE=4 SV=2
C1GY09	1.00316	0.468477	1609	0.00120655	0.00121036	Peroxidase OS=Paracoccidioides lutzii (strain ATCC MYA-826 / Pb01) OX=502779 GN=PAAG_03292 PE=3 SV=1; Additional IDs concatenated into MaxParsimony group: C1GXC8
C1H7Q5	1.0036	0.481356	761	0.000208014	0.000208764	Uncharacterized protein OS=Paracoccidioides lutzii (strain ATCC MYA-826 / Pb01) OX=502779 GN=PAAG_06796 PE=4 SV=1
C1GY88	1.00422	0.492756	817	0.000372929	0.000374504	V-type proton ATPase subunit C OS=Paracoccidioides lutzii (strain ATCC MYA-826 / Pb01) OX=502779 GN=PAAG_03042 PE=3 SV=1
C1HBD3	1.00471	0.484838	1548	0.000943781	0.000948227	Clock-controlled gene-9 protein OS=Paracoccidioides lutzii (strain ATCC MYA-826 / Pb01) OX=502779 GN=PAAG_08074 PE=4 SV=2
C1H2F8	1.00487	0.488498	477	0.000180772	0.000181653	Short chain dehydrogenase family protein OS=Paracoccidioides lutzii (strain ATCC MYA-826 / Pb01) OX=502779 GN=PAAG_04787 PE=4 SV=2
C1H6J6	1.00548	0.465823	40	0.00100934	0.00101487	Homoisocitrate dehydrogenase OS=Paracoccidioides lutzii (strain ATCC MYA-826 / Pb01) OX=502779 GN=PAAG_06387 PE=4 SV=1
C1HDM3	1.00566	0.471649	1045	0.000374672	0.000376792	Cell division control protein OS=Paracoccidioides lutzii (strain ATCC MYA-826 / Pb01) OX=502779 GN=PAAG_08880 PE=3 SV=1
C1GYN7	1.00678	0.48431	1938	0.000912015	0.000918201	26S proteasome regulatory subunit RPN2 OS=Paracoccidioides lutzii (strain ATCC MYA-826 / Pb01) OX=502779 GN=PAAG_03191 PE=3 SV=1
C1H5I3	1.00714	0.486613	1402	0.000206301	0.000207773	Exosome complex exonuclease RRP4 OS=Paracoccidioides lutzii (strain ATCC MYA-826 / Pb01) OX=502779 GN=PAAG_06024 PE=4 SV=2
C1HBP2	1.00725	0.488391	1699	0.000180688	0.000181997	Heterochromatin protein HP1 OS=Paracoccidioides lutzii (strain ATCC MYA-826 / Pb01) OX=502779 GN=PAAG_08183 PE=4 SV=2
C1GR47	1.00739	0.488832	1176	9.65806e-05	9.72947e-05	Uncharacterized protein OS=Paracoccidioides lutzii (strain ATCC MYA-826 / Pb01) OX=502779 GN=PAAG_00992 PE=4 SV=1
C1HAZ5	1.00742	0.482417	1089	0.000193662	0.000195099	CBS domain-containing protein OS=Paracoccidioides lutzii (strain ATCC MYA-826 / Pb01) OX=502779 GN=PAAG_07859 PE=4 SV=2
C1GWH4	1.00774	0.40736	944	0.00310364	0.00312765	Phosphoglycerate kinase OS=Paracoccidioides lutzii (strain ATCC MYA-826 / Pb01) OX=502779 GN=PAAG_02869 PE=3 SV=1
C1H5Q5	1.00839	0.4727	1630	0.000388063	0.000391319	Uncharacterized protein OS=Paracoccidioides lutzii (strain ATCC MYA-826 / Pb01) OX=502779 GN=PAAG_06250 PE=4 SV=1
C1HBF2	1.00881	0.467129	1879	0.000595018	0.000600261	GTP-binding protein ypt3 OS=Paracoccidioides lutzii (strain ATCC MYA-826 / Pb01) OX=502779 GN=PAAG_08093 PE=4 SV=2
C1H6W5	1.00928	0.456463	961	0.00128558	0.00129751	Aspartate aminotransferase OS=Paracoccidioides lutzii (strain ATCC MYA-826 / Pb01) OX=502779 GN=PAAG_06506 PE=4 SV=1
C1H6Q1	1.00938	0.485085	1971	0.000220876	0.000222949	Phosphopantothenoylcysteine decarboxylase OS=Paracoccidioides lutzii (strain ATCC MYA-826 / Pb01) OX=502779 GN=PAAG_06442 PE=4 SV=1
C1GR70	1.00986	0.394421	949	0.00182981	0.00184785	Phosphotransferase OS=Paracoccidioides lutzii (strain ATCC MYA-826 / Pb01) OX=502779 GN=PAAG_01015 PE=3 SV=2
C1H7N9	1.01004	0.469995	1566	0.000579997	0.000585821	Alkaline phosphatase OS=Paracoccidioides lutzii (strain ATCC MYA-826 / Pb01) OX=502779 GN=PAAG_06780 PE=3 SV=1
C1H5R6	1.01103	0.48833	125	0.000229314	0.000231844	DNA-directed RNA polymerase II subunit RPB3 OS=Paracoccidioides lutzii (strain ATCC MYA-826 / Pb01) OX=502779 GN=PAAG_06261 PE=4 SV=1
C1HBY6	1.01137	0.459498	992	0.00054024	0.000546381	Nitroreductase family protein OS=Paracoccidioides lutzii (strain ATCC MYA-826 / Pb01) OX=502779 GN=PAAG_08277 PE=4 SV=1
C1H902	1.01198	0.46229	730	0.00101427	0.00102642	Phosphoribosylformylglycinamidine synthase OS=Paracoccidioides lutzii (strain ATCC MYA-826 / Pb01) OX=502779 GN=PAAG_07243 PE=3 SV=1
C1H5V8	1.01209	0.419997	1608	0.00107997	0.00109303	T-complex protein 1 subunit beta OS=Paracoccidioides lutzii (strain ATCC MYA-826 / Pb01) OX=502779 GN=PAAG_06068 PE=3 SV=2
C1H6X4	1.01235	0.464916	1328	0.000526779	0.000533282	DUF833 domain-containing protein OS=Paracoccidioides lutzii (strain ATCC MYA-826 / Pb01) OX=502779 GN=PAAG_06515 PE=4 SV=1
C1GXJ8	1.01283	0.417692	531	0.00156798	0.0015881	Glutaminyl-tRNA synthetase OS=Paracoccidioides lutzii (strain ATCC MYA-826 / Pb01) OX=502779 GN=PAAG_03572 PE=3 SV=2
A0A0A2V7Y7	1.01291	0.448625	1919	0.00127519	0.00129165	60S ribosomal protein L5 OS=Paracoccidioides lutzii (strain ATCC MYA-826 / Pb01) OX=502779 GN=PAAG_11125 PE=3 SV=1
C1H2V0	1.01294	0.385077	1271	0.00179925	0.00182253	Succinyl-CoA:3-ketoacid-coenzyme A transferase OS=Paracoccidioides lutzii (strain ATCC MYA-826 / Pb01) OX=502779 GN=PAAG_05093 PE=3 SV=1
C1GZ84	1.01301	0.443629	1553	0.000733544	0.000743086	40S ribosomal protein S9 OS=Paracoccidioides lutzii (strain ATCC MYA-826 / Pb01) OX=502779 GN=PAAG_03828 PE=4 SV=2
C1GVB1	1.01302	0.464087	1324	0.00052823	0.000535108	Uncharacterized protein OS=Paracoccidioides lutzii (strain ATCC MYA-826 / Pb01) OX=502779 GN=PAAG_02584 PE=4 SV=2
C1GP51	1.01318	0.480174	508	0.000125216	0.000126867	Uncharacterized protein OS=Paracoccidioides lutzii (strain ATCC MYA-826 / Pb01) OX=502779 GN=PAAG_00296 PE=4 SV=2
C1HB45	1.0138	0.476614	1471	0.000140829	0.000142772	6-phosphofructo-2-kinase OS=Paracoccidioides lutzii (strain ATCC MYA-826 / Pb01) OX=502779 GN=PAAG_07986 PE=4 SV=1
C1GNM6	1.01399	0.464686	1723	0.00015429	0.000156449	Two-component system protein A OS=Paracoccidioides lutzii (strain ATCC MYA-826 / Pb01) OX=502779 GN=PAAG_00121 PE=4 SV=2
C1H2N8	1.01407	0.445927	363	0.000526656	0.000534065	NADH-ubiquinone oxidoreductase 40 kDa subunit OS=Paracoccidioides lutzii (strain ATCC MYA-826 / Pb01) OX=502779 GN=PAAG_05031 PE=4 SV=2
C1H8T4	1.0142	0.441827	330	0.000665555	0.000675006	Uncharacterized protein OS=Paracoccidioides lutzii (strain ATCC MYA-826 / Pb01) OX=502779 GN=PAAG_07175 PE=4 SV=1
C1GQK9	1.01464	0.477837	1704	0.000220083	0.000223304	Endoplasmic reticulum-Golgi intermediate compartment protein OS=Paracoccidioides lutzii (strain ATCC MYA-826 / Pb01) OX=502779 GN=PAAG_00804 PE=4 SV=1
C1GPZ3	1.01494	0.420725	716	0.00101213	0.00102726	Fumarate hydratase OS=Paracoccidioides lutzii (strain ATCC MYA-826 / Pb01) OX=502779 GN=PAAG_00588 PE=3 SV=2
C1H1C6	1.01532	0.426569	1551	0.000652595	0.000662592	ATP synthase subunit d, mitochondrial OS=Paracoccidioides lutzii (strain ATCC MYA-826 / Pb01) OX=502779 GN=PAAG_04570 PE=3 SV=1
C1GWI3	1.01551	0.468601	830	0.000166475	0.000169057	Uncharacterized protein OS=Paracoccidioides lutzii (strain ATCC MYA-826 / Pb01) OX=502779 GN=PAAG_02878 PE=4 SV=2
C1H167	1.0157	0.411407	956	0.0015242	0.00154813	ATP-dependent RNA helicase SUB2 OS=Paracoccidioides lutzii (strain ATCC MYA-826 / Pb01) OX=502779 GN=PAAG_04511 PE=4 SV=2
C1H9M6	1.0157	0.415754	1589	0.0020543	0.00208655	Dipeptidyl peptidase 3 OS=Paracoccidioides lutzii (strain ATCC MYA-826 / Pb01) OX=502779 GN=PAAG_07467 PE=3 SV=1
C1GNZ9	1.01626	0.37425	952	0.00189529	0.0019261	Polyadenylate-binding protein OS=Paracoccidioides lutzii (strain ATCC MYA-826 / Pb01) OX=502779 GN=PAAG_00244 PE=3 SV=1
C1H0V7	1.01656	0.402497	982	0.000830275	0.000844025	Branched-chain-amino-acid aminotransferase OS=Paracoccidioides lutzii (strain ATCC MYA-826 / Pb01) OX=502779 GN=PAAG_04401 PE=3 SV=2
C1GT81	1.01658	0.441818	1550	0.00081623	0.000829766	26S protease regulatory subunit 8 OS=Paracoccidioides lutzii (strain ATCC MYA-826 / Pb01) OX=502779 GN=PAAG_01726 PE=3 SV=1
C1GQH5	1.01659	0.408215	1858	0.000512624	0.000521128	26S protease regulatory subunit OS=Paracoccidioides lutzii (strain ATCC MYA-826 / Pb01) OX=502779 GN=PAAG_00770 PE=3 SV=2
C1H664	1.01767	0.437654	1676	0.000346859	0.000352987	Uncharacterized protein OS=Paracoccidioides lutzii (strain ATCC MYA-826 / Pb01) OX=502779 GN=PAAG_06174 PE=4 SV=1
C1GWK6	1.01793	0.428463	680	0.0015128	0.00153992	S-adenosylmethionine synthase OS=Paracoccidioides lutzii (strain ATCC MYA-826 / Pb01) OX=502779 GN=PAAG_02901 PE=3 SV=2
C1H9G8	1.01799	0.461845	2215	0.000165919	0.000168904	Uncharacterized protein OS=Paracoccidioides lutzii (strain ATCC MYA-826 / Pb01) OX=502779 GN=PAAG_07409 PE=4 SV=1
C1HDS0	1.018	0.467019	2179	0.000153683	0.000156449	Uncharacterized protein OS=Paracoccidioides lutzii (strain ATCC MYA-826 / Pb01) OX=502779 GN=PAAG_08913 PE=3 SV=2
C1H658	1.0193	0.407375	1036	0.000484851	0.000494208	Peptidyl-prolyl cis-trans isomerase OS=Paracoccidioides lutzii (strain ATCC MYA-826 / Pb01) OX=502779 GN=PAAG_06168 PE=3 SV=2; Additional IDs concatenated into MaxParsimony group: C1GVB5
C1GSB8	1.02038	0.361819	2313	0.000664078	0.000677615	40S ribosomal protein S17 OS=Paracoccidioides lutzii (strain ATCC MYA-826 / Pb01) OX=502779 GN=PAAG_01413 PE=3 SV=1
C1GPM3	1.02043	0.348406	946	0.00325797	0.00332453	4-aminobutyrate aminotransferase OS=Paracoccidioides lutzii (strain ATCC MYA-826 / Pb01) OX=502779 GN=PAAG_00468 PE=3 SV=2
C1HBG2	1.0208	0.390466	45	0.00114861	0.0011725	EF hand domain-containing protein OS=Paracoccidioides lutzii (strain ATCC MYA-826 / Pb01) OX=502779 GN=PAAG_08103 PE=4 SV=2
C1GPX1	1.02089	0.439367	1972	0.000498689	0.000509104	Aflatoxin B1 aldehyde reductase member 2 OS=Paracoccidioides lutzii (strain ATCC MYA-826 / Pb01) OX=502779 GN=PAAG_00566 PE=4 SV=1
C1GTL5	1.02108	0.388702	1260	0.000829189	0.000846672	Uncharacterized protein OS=Paracoccidioides lutzii (strain ATCC MYA-826 / Pb01) OX=502779 GN=PAAG_01860 PE=4 SV=1
C1HA31	1.02123	0.332149	1920	0.00126169	0.00128847	Threonine synthase OS=Paracoccidioides lutzii (strain ATCC MYA-826 / Pb01) OX=502779 GN=PAAG_07760 PE=4 SV=1
C1H0Y0	1.02314	0.427435	2295	0.000625283	0.000639751	Glutathione peroxidase OS=Paracoccidioides lutzii (strain ATCC MYA-826 / Pb01) OX=502779 GN=PAAG_04424 PE=3 SV=1
C1GY49	1.02358	0.451308	438	0.000152137	0.000155724	Uncharacterized protein OS=Paracoccidioides lutzii (strain ATCC MYA-826 / Pb01) OX=502779 GN=PAAG_03003 PE=4 SV=2
C1GPP8	1.02371	0.38036	1871	0.00045814	0.000469004	Autophagy-related protein 3 OS=Paracoccidioides lutzii (strain ATCC MYA-826 / Pb01) OX=502779 GN=PAAG_00493 PE=3 SV=1
C1H4W5	1.02479	0.385132	1861	0.000595423	0.000610185	Phenylalanyl-tRNA synthetase alpha chain OS=Paracoccidioides lutzii (strain ATCC MYA-826 / Pb01) OX=502779 GN=PAAG_05806 PE=4 SV=1
C1HDW2	1.02484	0.27387	1586	0.00169037	0.00173236	40S ribosomal protein S1 OS=Paracoccidioides lutzii (strain ATCC MYA-826 / Pb01) OX=502779 GN=RPS1 PE=3 SV=1
C1GPC6	1.02552	0.392709	328	0.000789041	0.000809178	Phosphatase 2C Ptc3 OS=Paracoccidioides lutzii (strain ATCC MYA-826 / Pb01) OX=502779 GN=PAAG_00371 PE=3 SV=2
C1H944	1.02569	0.276024	688	0.00220557	0.00226223	Vacuolar ATP synthase catalytic subunit A OS=Paracoccidioides lutzii (strain ATCC MYA-826 / Pb01) OX=502779 GN=PAAG_07285 PE=3 SV=2
C1GVY7	1.02609	0.367389	718	0.000734877	0.000754052	Fructose-1,6-bisphosphatase OS=Paracoccidioides lutzii (strain ATCC MYA-826 / Pb01) OX=502779 GN=PAAG_02682 PE=3 SV=1
C1HAY3	1.02614	0.434829	420	0.000152959	0.000156958	40S ribosomal protein S26 OS=Paracoccidioides lutzii (strain ATCC MYA-826 / Pb01) OX=502779 GN=PAAG_07847 PE=3 SV=1
C1HA46	1.02659	0.322466	2267	0.00224334	0.00230298	Heat shock protein SSB1 OS=Paracoccidioides lutzii (strain ATCC MYA-826 / Pb01) OX=502779 GN=PAAG_07775 PE=3 SV=2
C1H3P9	1.02737	0.243305	1276	0.00160802	0.00165202	Betaine aldehyde dehydrogenase OS=Paracoccidioides lutzii (strain ATCC MYA-826 / Pb01) OX=502779 GN=PAAG_05392 PE=3 SV=1
C1H1C8	1.02788	0.404113	737	0.000444163	0.000456547	Ribosomal protein L14 OS=Paracoccidioides lutzii (strain ATCC MYA-826 / Pb01) OX=502779 GN=PAAG_04572 PE=4 SV=1
C1H2H3	1.02793	0.383742	1620	0.000707064	0.000726815	Hydrolase OS=Paracoccidioides lutzii (strain ATCC MYA-826 / Pb01) OX=502779 GN=PAAG_04966 PE=4 SV=1
C1GT65	1.02846	0.362505	1875	0.000443257	0.000455874	Polymerase II polypeptide D OS=Paracoccidioides lutzii (strain ATCC MYA-826 / Pb01) OX=502779 GN=PAAG_01710 PE=4 SV=1
C1GR52	1.02855	0.293384	23	0.00163308	0.00167971	Actin-interacting protein OS=Paracoccidioides lutzii (strain ATCC MYA-826 / Pb01) OX=502779 GN=PAAG_00997 PE=4 SV=2
C1H5N8	1.02946	0.402202	1254	0.000746475	0.000768466	Vesicular-fusion protein SEC17 OS=Paracoccidioides lutzii (strain ATCC MYA-826 / Pb01) OX=502779 GN=PAAG_06233 PE=4 SV=1
C1GVQ5	1.02954	0.421158	1086	0.000152305	0.000156805	Uncharacterized protein OS=Paracoccidioides lutzii (strain ATCC MYA-826 / Pb01) OX=502779 GN=PAAG_02600 PE=4 SV=2
C1H535	1.02965	0.462214	1132	0.000137859	0.000141947	Uncharacterized protein OS=Paracoccidioides lutzii (strain ATCC MYA-826 / Pb01) OX=502779 GN=PAAG_05876 PE=3 SV=2
C1H3X3	1.02983	0.439724	1973	0.000417086	0.000429529	Probable Xaa-Pro aminopeptidase PAAG_05466 OS=Paracoccidioides lutzii (strain ATCC MYA-826 / Pb01) OX=502779 GN=PAAG_05466 PE=3 SV=2
C1H2M6	1.03019	0.304962	1258	0.000734015	0.000756176	Uncharacterized protein OS=Paracoccidioides lutzii (strain ATCC MYA-826 / Pb01) OX=502779 GN=PAAG_05019 PE=4 SV=1
C1GSN0	1.0303	0.220624	2256	0.00548142	0.00564748	Fatty acid synthase subunit alpha reductase OS=Paracoccidioides lutzii (strain ATCC MYA-826 / Pb01) OX=502779 GN=PAAG_01525 PE=3 SV=1
C1GX98	1.03093	0.414581	2022	0.000289937	0.000298904	Transmembrane 9 superfamily member OS=Paracoccidioides lutzii (strain ATCC MYA-826 / Pb01) OX=502779 GN=PAAG_03472 PE=3 SV=1
C1GVH8	1.03114	0.344197	552	0.000845755	0.000872096	mRNA decapping hydrolase OS=Paracoccidioides lutzii (strain ATCC MYA-826 / Pb01) OX=502779 GN=PAAG_02255 PE=4 SV=1
C1H8F9	1.03131	0.299437	360	0.000428821	0.000442249	Uncharacterized protein OS=Paracoccidioides lutzii (strain ATCC MYA-826 / Pb01) OX=502779 GN=PAAG_06955 PE=4 SV=1
C1GR09	1.03224	0.289643	2264	0.00227342	0.00234672	Urease OS=Paracoccidioides lutzii (strain ATCC MYA-826 / Pb01) OX=502779 GN=PAAG_00954 PE=3 SV=2
C1H6D8	1.0326	0.339055	726	0.000720624	0.000744115	3-hydroxybutyryl-CoA dehydrogenase OS=Paracoccidioides lutzii (strain ATCC MYA-826 / Pb01) OX=502779 GN=PAAG_06329 PE=4 SV=1
C1GW14	1.03264	0.406271	391	0.00042828	0.000442261	Uncharacterized protein OS=Paracoccidioides lutzii (strain ATCC MYA-826 / Pb01) OX=502779 GN=PAAG_02709 PE=4 SV=1
C1GUU1	1.03271	0.369752	706	0.00121952	0.00125941	26S proteasome regulatory subunit RPN1 OS=Paracoccidioides lutzii (strain ATCC MYA-826 / Pb01) OX=502779 GN=PAAG_02414 PE=3 SV=1
A0A0A2V0F7	1.03367	0.371038	203	0.000138676	0.000143345	Uncharacterized protein OS=Paracoccidioides lutzii (strain ATCC MYA-826 / Pb01) OX=502779 GN=PAAG_12300 PE=4 SV=1
C1H3S2	1.03417	0.379966	466	0.000137907	0.00014262	Succinate dehydrogenase [ubiquinone] cytochrome b small subunit OS=Paracoccidioides lutzii (strain ATCC MYA-826 / Pb01) OX=502779 GN=PAAG_05415 PE=3 SV=1
C1GZE6	1.03445	0.371268	81	0.000416182	0.00043052	DUF866 domain-containing protein OS=Paracoccidioides lutzii (strain ATCC MYA-826 / Pb01) OX=502779 GN=PAAG_03890 PE=4 SV=2
C1H599	1.03504	0.39936	2339	0.000263586	0.000272822	Deoxyribose-phosphate aldolase OS=Paracoccidioides lutzii (strain ATCC MYA-826 / Pb01) OX=502779 GN=PAAG_05940 PE=3 SV=1
C1GU83	1.03595	0.372065	197	0.000138676	0.000143662	Branchpoint-bridging protein OS=Paracoccidioides lutzii (strain ATCC MYA-826 / Pb01) OX=502779 GN=PAAG_02078 PE=4 SV=2
C1H5U3	1.03626	0.305845	31	0.0011768	0.00121947	Vacuolar proton pump subunit B OS=Paracoccidioides lutzii (strain ATCC MYA-826 / Pb01) OX=502779 GN=PAAG_06288 PE=3 SV=2
C1GVJ1	1.03831	0.420819	1376	0.000124394	0.00012916	DNA-directed RNA polymerase subunit OS=Paracoccidioides lutzii (strain ATCC MYA-826 / Pb01) OX=502779 GN=PAAG_02268 PE=3 SV=2
C1GUT2	1.03844	0.44167	446	0.000124379	0.00012916	Uncharacterized protein OS=Paracoccidioides lutzii (strain ATCC MYA-826 / Pb01) OX=502779 GN=PAAG_02405 PE=4 SV=1
C1HDX2	1.03858	0.416459	889	0.000163519	0.000169827	Uncharacterized protein OS=Paracoccidioides lutzii (strain ATCC MYA-826 / Pb01) OX=502779 GN=PAAG_08965 PE=4 SV=2
C1GRA7	1.03885	0.370684	1928	0.000890624	0.000925221	60S ribosomal protein L10-B OS=Paracoccidioides lutzii (strain ATCC MYA-826 / Pb01) OX=502779 GN=PAAG_01052 PE=4 SV=2
C1GPP9	1.03928	0.399406	1084	0.000249219	0.000259007	Uncharacterized protein OS=Paracoccidioides lutzii (strain ATCC MYA-826 / Pb01) OX=502779 GN=PAAG_00494 PE=4 SV=1
C1HDT8	1.03929	0.219032	540	0.00144128	0.0014979	Glutamate carboxypeptidase OS=Paracoccidioides lutzii (strain ATCC MYA-826 / Pb01) OX=502779 GN=PAAG_08931 PE=4 SV=1
C1GXS9	1.03966	0.191165	1244	0.0014273	0.00148391	Cap binding protein OS=Paracoccidioides lutzii (strain ATCC MYA-826 / Pb01) OX=502779 GN=PAAG_03652 PE=4 SV=2
C1H222	1.03981	0.318841	2326	0.000539546	0.000561025	Eukaryotic translation initiation factor 6 OS=Paracoccidioides lutzii (strain ATCC MYA-826 / Pb01) OX=502779 GN=TIF6 PE=3 SV=2
C1H1W3	1.03986	0.406735	1941	0.000799456	0.00083132	26S protease regulatory subunit 4 OS=Paracoccidioides lutzii (strain ATCC MYA-826 / Pb01) OX=502779 GN=PAAG_04899 PE=3 SV=2
A0A0A2V5Q0	1.0404	0.20779	964	0.00126103	0.00131198	Pro-apoptotic serine protease NMA111 OS=Paracoccidioides lutzii (strain ATCC MYA-826 / Pb01) OX=502779 GN=PAAG_11638 PE=4 SV=1
C1GSP0	1.04076	0.400972	342	0.000512176	0.000533051	Ser/Thr protein phosphatase family OS=Paracoccidioides lutzii (strain ATCC MYA-826 / Pb01) OX=502779 GN=PAAG_01535 PE=4 SV=1
A0A0A2UYM1	1.04124	0.452298	430	0.000112963	0.000117621	Farnesyl-diphosphate farnesyltransferase OS=Paracoccidioides lutzii (strain ATCC MYA-826 / Pb01) OX=502779 GN=PAAG_12679 PE=4 SV=1
C1GSU3	1.04134	0.330054	1946	0.000650716	0.000677615	SNARE Ykt6 OS=Paracoccidioides lutzii (strain ATCC MYA-826 / Pb01) OX=502779 GN=PAAG_01588 PE=4 SV=1
C1H6B7	1.042	0.375763	1698	0.000236649	0.00024659	Uncharacterized protein OS=Paracoccidioides lutzii (strain ATCC MYA-826 / Pb01) OX=502779 GN=PAAG_06308 PE=4 SV=1
C1GW98	1.04228	0.435467	1464	0.000137835	0.000143662	THO complex subunit 3 OS=Paracoccidioides lutzii (strain ATCC MYA-826 / Pb01) OX=502779 GN=PAAG_02793 PE=4 SV=2
C1GQB8	1.04292	0.408022	1072	0.000189632	0.000197772	60S ribosomal protein L38 OS=Paracoccidioides lutzii (strain ATCC MYA-826 / Pb01) OX=502779 GN=PAAG_00713 PE=3 SV=1
C1GS32	1.04502	0.359622	335	0.000595226	0.000622022	Uncharacterized protein OS=Paracoccidioides lutzii (strain ATCC MYA-826 / Pb01) OX=502779 GN=PAAG_01327 PE=4 SV=1
C1GSF9	1.04552	0.128806	2286	0.00257584	0.00269308	Catalase OS=Paracoccidioides lutzii (strain ATCC MYA-826 / Pb01) OX=502779 GN=PAAG_01454 PE=3 SV=2
C1HBN1	1.04564	0.318951	1249	0.00113416	0.00118592	Lysine--tRNA ligase OS=Paracoccidioides lutzii (strain ATCC MYA-826 / Pb01) OX=502779 GN=PAAG_08172 PE=3 SV=1
C1GR38	1.04589	0.423284	1380	0.000248871	0.00026029	Tetratricopeptide repeat domain-containing protein OS=Paracoccidioides lutzii (strain ATCC MYA-826 / Pb01) OX=502779 GN=PAAG_00983 PE=4 SV=1
C1GP50	1.04626	0.138886	1594	0.0018023	0.00188569	Ubiquitin carboxyl-terminal hydrolase OS=Paracoccidioides lutzii (strain ATCC MYA-826 / Pb01) OX=502779 GN=PAAG_00295 PE=3 SV=2
C1GZJ4	1.04636	0.272264	2278	0.00073407	0.000768099	Uncharacterized protein OS=Paracoccidioides lutzii (strain ATCC MYA-826 / Pb01) OX=502779 GN=PAAG_03938 PE=4 SV=2
C1H1Q2	1.04719	0.16064	368	0.000360152	0.000377148	ATP synthase subunit 4 OS=Paracoccidioides lutzii (strain ATCC MYA-826 / Pb01) OX=502779 GN=PAAG_04838 PE=4 SV=2
C1GXV6	1.04728	0.335657	449	0.000124324	0.000130203	Uncharacterized protein OS=Paracoccidioides lutzii (strain ATCC MYA-826 / Pb01) OX=502779 GN=PAAG_03239 PE=4 SV=1
C1HD43	1.04729	0.340864	773	0.000484949	0.000507885	Polyubiquitin binding protein OS=Paracoccidioides lutzii (strain ATCC MYA-826 / Pb01) OX=502779 GN=PAAG_08684 PE=4 SV=1
C1HE96	1.04759	0.384778	97	0.000346135	0.000362607	ATP phosphoribosyltransferase OS=Paracoccidioides lutzii (strain ATCC MYA-826 / Pb01) OX=502779 GN=PAAG_09095 PE=3 SV=2
C1HAY7	1.04765	0.25958	32	0.00119274	0.00124957	T-complex protein 1 subunit eta OS=Paracoccidioides lutzii (strain ATCC MYA-826 / Pb01) OX=502779 GN=PAAG_07851 PE=3 SV=2
C1GZK7	1.04865	0.309904	705	0.000982245	0.00103003	Prolyl-tRNA synthetase OS=Paracoccidioides lutzii (strain ATCC MYA-826 / Pb01) OX=502779 GN=PAAG_03951 PE=3 SV=2
C1H7W3	1.04881	0.230835	21	0.00144023	0.00151053	DNA-directed RNA polymerase subunit beta OS=Paracoccidioides lutzii (strain ATCC MYA-826 / Pb01) OX=502779 GN=PAAG_06854 PE=3 SV=1
C1GNA9	1.04923	0.187049	25	0.00137305	0.00144065	Coronin OS=Paracoccidioides lutzii (strain ATCC MYA-826 / Pb01) OX=502779 GN=PAAG_00004 PE=3 SV=1
C1H987	1.04941	0.377221	1070	0.000235174	0.000246792	Transport protein SEC61 subunit alpha OS=Paracoccidioides lutzii (strain ATCC MYA-826 / Pb01) OX=502779 GN=PAAG_07328 PE=3 SV=1
C1H6H6	1.04948	0.317463	714	0.000747059	0.000784026	30S ribosomal protein S17P OS=Paracoccidioides lutzii (strain ATCC MYA-826 / Pb01) OX=502779 GN=PAAG_06367 PE=3 SV=1
A0A0A2V3H6	1.0495	0.117247	1900	0.000346691	0.000363853	Uncharacterized protein OS=Paracoccidioides lutzii (strain ATCC MYA-826 / Pb01) OX=502779 GN=PAAG_11221 PE=4 SV=1
C1GYJ8	1.05028	0.333961	1250	0.000956817	0.00100493	CobW domain-containing protein OS=Paracoccidioides lutzii (strain ATCC MYA-826 / Pb01) OX=502779 GN=PAAG_03152 PE=4 SV=1
C1GP57	1.05091	0.202581	53	0.000817775	0.000859409	Exportin-1 OS=Paracoccidioides lutzii (strain ATCC MYA-826 / Pb01) OX=502779 GN=PAAG_00302 PE=4 SV=2
C1H938	1.05093	0.273811	976	0.000707233	0.000743251	Farnesyl pyrophosphate synthetase OS=Paracoccidioides lutzii (strain ATCC MYA-826 / Pb01) OX=502779 GN=PAAG_07279 PE=3 SV=1
C1H2P0	1.05122	0.418457	812	0.000235675	0.000247745	Mitogen-activated protein kinase OS=Paracoccidioides lutzii (strain ATCC MYA-826 / Pb01) OX=502779 GN=PAAG_05033 PE=3 SV=2
C1GSQ1	1.05145	0.430296	1097	0.000234367	0.000246425	Uncharacterized protein OS=Paracoccidioides lutzii (strain ATCC MYA-826 / Pb01) OX=502779 GN=PAAG_01546 PE=4 SV=1
C1HBZ6	1.05214	0.265404	46	0.000901188	0.000948172	T-complex protein 1 subunit theta OS=Paracoccidioides lutzii (strain ATCC MYA-826 / Pb01) OX=502779 GN=PAAG_08287 PE=3 SV=1
C1GUV4	1.05216	0.402756	1419	0.000221377	0.000232925	Serine/threonine-protein kinase ppk8 OS=Paracoccidioides lutzii (strain ATCC MYA-826 / Pb01) OX=502779 GN=PAAG_02427 PE=4 SV=2
C1GWJ4	1.05247	0.236488	1555	0.000580986	0.000611471	Ribosomal protein L35 OS=Paracoccidioides lutzii (strain ATCC MYA-826 / Pb01) OX=502779 GN=PAAG_02889 PE=3 SV=2
A0A0A2V3T3	1.05271	0.207429	542	0.00150957	0.00158914	Uncharacterized protein OS=Paracoccidioides lutzii (strain ATCC MYA-826 / Pb01) OX=502779 GN=PAAG_12288 PE=4 SV=1
A0A0A2V629	1.05288	0.435563	2352	0.0001847	0.000194467	Uncharacterized protein OS=Paracoccidioides lutzii (strain ATCC MYA-826 / Pb01) OX=502779 GN=PAAG_11515 PE=3 SV=1
C1HE24	1.05315	0.437308	1194	0.000122658	0.000129177	UBX domain-containing protein OS=Paracoccidioides lutzii (strain ATCC MYA-826 / Pb01) OX=502779 GN=PAAG_09017 PE=4 SV=1
C1HDG6	1.05381	0.423517	2040	0.000111434	0.00011743	Gamma-glutamylcyclotransferase OS=Paracoccidioides lutzii (strain ATCC MYA-826 / Pb01) OX=502779 GN=PAAG_08807 PE=3 SV=2
C1H0J6	1.0552	0.172285	695	0.00153978	0.00162478	Neutral alpha-glucosidase AB OS=Paracoccidioides lutzii (strain ATCC MYA-826 / Pb01) OX=502779 GN=PAAG_04290 PE=3 SV=1
C1H3E9	1.05542	0.271453	66	0.000664677	0.000701511	Glutathione reductase OS=Paracoccidioides lutzii (strain ATCC MYA-826 / Pb01) OX=502779 GN=PAAG_05292 PE=3 SV=2
C1GS03	1.05576	0.189461	984	0.000900406	0.000950616	M protein repeat protein OS=Paracoccidioides lutzii (strain ATCC MYA-826 / Pb01) OX=502779 GN=PAAG_01298 PE=4 SV=1
C1GQQ5	1.05685	0.156752	1585	0.00245309	0.00259255	Glucosamine-fructose-6-phosphate aminotransferase OS=Paracoccidioides lutzii (strain ATCC MYA-826 / Pb01) OX=502779 GN=PAAG_00850 PE=4 SV=2
C1GZ83	1.057	0.36529	1248	0.000790744	0.000835815	60S ribosomal protein L21-A OS=Paracoccidioides lutzii (strain ATCC MYA-826 / Pb01) OX=502779 GN=PAAG_03827 PE=4 SV=1
C1H4M3	1.05727	0.394178	113	0.000306697	0.000324261	Carbonic anhydrase OS=Paracoccidioides lutzii (strain ATCC MYA-826 / Pb01) OX=502779 GN=PAAG_05716 PE=3 SV=1
C1H5Y7	1.05738	0.419327	2050	0.000110863	0.000117225	Uncharacterized protein OS=Paracoccidioides lutzii (strain ATCC MYA-826 / Pb01) OX=502779 GN=PAAG_06097 PE=4 SV=2
C1H6C9	1.05821	0.269412	536	0.0012333	0.0013051	60S ribosomal protein L13 OS=Paracoccidioides lutzii (strain ATCC MYA-826 / Pb01) OX=502779 GN=PAAG_06320 PE=3 SV=1
C1GYG2	1.05834	0.252032	1290	0.000985533	0.00104303	Acyl-coenzyme A oxidase OS=Paracoccidioides lutzii (strain ATCC MYA-826 / Pb01) OX=502779 GN=PAAG_03116 PE=3 SV=1
C1GQC8	1.05885	0.25516	765	0.000443286	0.000469374	Uncharacterized protein OS=Paracoccidioides lutzii (strain ATCC MYA-826 / Pb01) OX=502779 GN=PAAG_00723 PE=4 SV=2
C1GSI4	1.05888	0.349228	1859	0.000551614	0.000584095	26S protease regulatory subunit 8 OS=Paracoccidioides lutzii (strain ATCC MYA-826 / Pb01) OX=502779 GN=PAAG_01479 PE=3 SV=1
C1H978	1.0591	0.256376	2298	0.000859107	0.000909878	Probable Xaa-Pro aminopeptidase P OS=Paracoccidioides lutzii (strain ATCC MYA-826 / Pb01) OX=502779 GN=AMPP PE=3 SV=2
A0A0A2V518	1.06003	0.17991	44	0.00109358	0.00115923	Protein transporter SEC23 OS=Paracoccidioides lutzii (strain ATCC MYA-826 / Pb01) OX=502779 GN=PAAG_12063 PE=3 SV=1
C1H1G1	1.06022	0.357061	2010	0.000153029	0.000162243	Transport protein sec22 OS=Paracoccidioides lutzii (strain ATCC MYA-826 / Pb01) OX=502779 GN=PAAG_04605 PE=3 SV=2
C1H929	1.0608	0.372419	2000	0.000160574	0.000170337	Uncharacterized protein OS=Paracoccidioides lutzii (strain ATCC MYA-826 / Pb01) OX=502779 GN=PAAG_07270 PE=4 SV=2
C1H429	1.06134	0.33021	1064	0.000317888	0.000337389	Ribosome biogenesis protein OS=Paracoccidioides lutzii (strain ATCC MYA-826 / Pb01) OX=502779 GN=PAAG_05522 PE=4 SV=2
A0A0A2V3B6	1.06165	0.321556	1342	0.000208182	0.000221016	Uncharacterized protein OS=Paracoccidioides lutzii (strain ATCC MYA-826 / Pb01) OX=502779 GN=PAAG_11161 PE=4 SV=1
C1H232	1.06201	0.170666	51	0.000734322	0.000779855	Cleavage and polyadenylation specificity factor subunit 5 OS=Paracoccidioides lutzii (strain ATCC MYA-826 / Pb01) OX=502779 GN=PAAG_04662 PE=4 SV=2
C1H231	1.06211	0.281145	1895	0.00073339	0.000778939	A-factor-processing enzyme OS=Paracoccidioides lutzii (strain ATCC MYA-826 / Pb01) OX=502779 GN=PAAG_04661 PE=4 SV=2
C1GZB3	1.06242	0.284375	1883	0.000429475	0.000456281	Phosphopantothenate-cysteine ligase OS=Paracoccidioides lutzii (strain ATCC MYA-826 / Pb01) OX=502779 GN=PAAG_03857 PE=4 SV=1
C1GWU6	1.06283	0.383709	1424	0.000137854	0.000146516	Uncharacterized protein OS=Paracoccidioides lutzii (strain ATCC MYA-826 / Pb01) OX=502779 GN=PAAG_03320 PE=4 SV=1
C1HDK6	1.06474	0.342228	794	0.000318893	0.000339539	60S ribosomal protein L28 OS=Paracoccidioides lutzii (strain ATCC MYA-826 / Pb01) OX=502779 GN=PAAG_08847 PE=3 SV=2
C1GNY9	1.06494	0.37339	164	0.000208029	0.000221539	Translation initiation factor IF-2 OS=Paracoccidioides lutzii (strain ATCC MYA-826 / Pb01) OX=502779 GN=PAAG_00234 PE=4 SV=1
C1GV25	1.06501	0.421316	2060	0.000120497	0.00012833	Uncharacterized protein OS=Paracoccidioides lutzii (strain ATCC MYA-826 / Pb01) OX=502779 GN=PAAG_02498 PE=4 SV=1
C1H4W2	1.06636	0.257653	318	0.000941653	0.00100414	Inosine-5'-monophosphate dehydrogenase OS=Paracoccidioides lutzii (strain ATCC MYA-826 / Pb01) OX=502779 GN=PAAG_05803 PE=3 SV=1
C1H293	1.06696	0.414317	2041	0.000119698	0.000127714	Cytoplasmic dynein 1 intermediate chain 2 OS=Paracoccidioides lutzii (strain ATCC MYA-826 / Pb01) OX=502779 GN=PAAG_04722 PE=4 SV=1
C1GXB5	1.06708	0.324741	126	0.00031878	0.000340162	Reticulon-like protein OS=Paracoccidioides lutzii (strain ATCC MYA-826 / Pb01) OX=502779 GN=PAAG_03489 PE=4 SV=2
C1H7D0	1.06759	0.318145	2001	0.000208	0.000222059	Molybdopterin synthase catalytic subunit OS=Paracoccidioides lutzii (strain ATCC MYA-826 / Pb01) OX=502779 GN=cnxH PE=3 SV=1
C1GU90	1.06814	0.414921	1153	0.000158392	0.000169184	Signal peptidase complex catalytic subunit SEC11 OS=Paracoccidioides lutzii (strain ATCC MYA-826 / Pb01) OX=502779 GN=SEC11 PE=3 SV=1
C1H2C1	1.06856	0.313651	1970	0.000291204	0.000311168	Uncharacterized protein OS=Paracoccidioides lutzii (strain ATCC MYA-826 / Pb01) OX=502779 GN=PAAG_04750 PE=4 SV=2
C1H2D0	1.0687	0.208444	1959	0.000804829	0.00086012	Uncharacterized protein OS=Paracoccidioides lutzii (strain ATCC MYA-826 / Pb01) OX=502779 GN=PAAG_04759 PE=4 SV=1
C1H4V7	1.06878	0.398824	2229	0.000122448	0.00013087	Uncharacterized protein OS=Paracoccidioides lutzii (strain ATCC MYA-826 / Pb01) OX=502779 GN=PAAG_05798 PE=4 SV=2
A0A0A2V6C0	1.06901	0.182585	36	0.00130355	0.00139351	Uncharacterized protein OS=Paracoccidioides lutzii (strain ATCC MYA-826 / Pb01) OX=502779 GN=PAAG_11612 PE=4 SV=1
C1GUP1	1.06939	0.311199	2318	0.000485718	0.000519424	Thioredoxin OS=Paracoccidioides lutzii (strain ATCC MYA-826 / Pb01) OX=502779 GN=PAAG_02364 PE=3 SV=1
C1H0N4	1.07	0.351791	1689	0.000120447	0.000128879	Endosomal cargo receptor (Erp3) OS=Paracoccidioides lutzii (strain ATCC MYA-826 / Pb01) OX=502779 GN=PAAG_04328 PE=3 SV=1
C1GQR1	1.07082	0.247094	723	0.000800149	0.000856812	Isocitrate dehydrogenase [NAD] subunit, mitochondrial OS=Paracoccidioides lutzii (strain ATCC MYA-826 / Pb01) OX=502779 GN=PAAG_00856 PE=3 SV=1
C1H3M4	1.07087	0.209334	1936	0.000914509	0.000979319	Alcohol dehydrogenase zinc-binding domain-containing protein OS=Paracoccidioides lutzii (strain ATCC MYA-826 / Pb01) OX=502779 GN=PAAG_05367 PE=4 SV=1
C1H7B6	1.07121	0.105182	736	0.000679921	0.00072834	Importin subunit alpha OS=Paracoccidioides lutzii (strain ATCC MYA-826 / Pb01) OX=502779 GN=PAAG_06657 PE=3 SV=1
C1GWE1	1.07182	0.205089	1967	0.000691112	0.000740745	Kynurenine formamidase OS=Paracoccidioides lutzii (strain ATCC MYA-826 / Pb01) OX=502779 GN=PAAG_02836 PE=3 SV=1
C1H2T4	1.07248	0.350594	1493	0.000140319	0.000150489	alpha-1,2-Mannosidase OS=Paracoccidioides lutzii (strain ATCC MYA-826 / Pb01) OX=502779 GN=PAAG_05077 PE=3 SV=2
C1H9M3	1.0728	0.378229	855	9.64275e-05	0.000103447	Uncharacterized protein OS=Paracoccidioides lutzii (strain ATCC MYA-826 / Pb01) OX=502779 GN=PAAG_07464 PE=4 SV=2
C1H800	1.07339	0.177974	2277	0.000873332	0.000937421	mRNA binding post-transcriptional regulator (Csx1) OS=Paracoccidioides lutzii (strain ATCC MYA-826 / Pb01) OX=502779 GN=PAAG_06891 PE=4 SV=2
C1GY07	1.0734	0.0859361	78	0.00058171	0.000624411	Thioredoxin OS=Paracoccidioides lutzii (strain ATCC MYA-826 / Pb01) OX=502779 GN=PAAG_03290 PE=4 SV=1
C1GPC0	1.07387	0.261004	1046	0.000291705	0.000313254	Uncharacterized protein OS=Paracoccidioides lutzii (strain ATCC MYA-826 / Pb01) OX=502779 GN=PAAG_00365 PE=4 SV=2
C1H2K5	1.0743	0.184057	935	0.00109368	0.00117494	60S ribosomal protein L8-B OS=Paracoccidioides lutzii (strain ATCC MYA-826 / Pb01) OX=502779 GN=PAAG_04998 PE=4 SV=2
C1GPB4	1.07587	0.236641	802	0.000386488	0.000415812	Uncharacterized protein OS=Paracoccidioides lutzii (strain ATCC MYA-826 / Pb01) OX=502779 GN=PAAG_00359 PE=4 SV=1
C1GXM5	1.07602	0.350519	359	0.000376301	0.000404908	Formate dehydrogenase OS=Paracoccidioides lutzii (strain ATCC MYA-826 / Pb01) OX=502779 GN=PAAG_03599 PE=3 SV=2
C1H8G5	1.07634	0.143633	1311	0.000569211	0.000612667	Aldehyde dehydrogenase OS=Paracoccidioides lutzii (strain ATCC MYA-826 / Pb01) OX=502779 GN=PAAG_06961 PE=3 SV=2
C1GX99	1.07643	0.261271	806	0.000277338	0.000298534	Neuronal calcium sensor 1 OS=Paracoccidioides lutzii (strain ATCC MYA-826 / Pb01) OX=502779 GN=PAAG_03473 PE=4 SV=2
C1GUJ1	1.07643	0.236779	547	0.00115109	0.00123907	Nuclear segregation protein Bfr1 OS=Paracoccidioides lutzii (strain ATCC MYA-826 / Pb01) OX=502779 GN=PAAG_02186 PE=4 SV=1
C1HED3	1.07679	0.287972	1326	0.000388048	0.000417845	Peptidylprolyl isomerase OS=Paracoccidioides lutzii (strain ATCC MYA-826 / Pb01) OX=502779 GN=PAAG_09122 PE=4 SV=1
C1GSM4	1.07751	0.246345	792	0.000278076	0.00029963	Inositol-1-monophosphatase OS=Paracoccidioides lutzii (strain ATCC MYA-826 / Pb01) OX=502779 GN=PAAG_01519 PE=3 SV=1
C1H860	1.07757	0.146888	333	0.000734238	0.000791191	Calnexin OS=Paracoccidioides lutzii (strain ATCC MYA-826 / Pb01) OX=502779 GN=PAAG_07037 PE=3 SV=1
C1GP85	1.07759	0.366006	1509	0.000225928	0.000243458	Pheromone-processing carboxypeptidase KEX1 OS=Paracoccidioides lutzii (strain ATCC MYA-826 / Pb01) OX=502779 GN=KEX1 PE=3 SV=1
C1HA92	1.07796	0.207105	1943	0.000749397	0.00080782	NAD dependent epimerase/dehydratase family protein OS=Paracoccidioides lutzii (strain ATCC MYA-826 / Pb01) OX=502779 GN=PAAG_07821 PE=4 SV=1
C1GVT2	1.07851	0.123273	73	0.000651454	0.000702602	RuvB-like helicase OS=Paracoccidioides lutzii (strain ATCC MYA-826 / Pb01) OX=502779 GN=PAAG_02627 PE=3 SV=2
C1GT55	1.07861	0.358417	1051	0.000265467	0.000286334	Uncharacterized protein OS=Paracoccidioides lutzii (strain ATCC MYA-826 / Pb01) OX=502779 GN=PAAG_01700 PE=4 SV=2
C1H6S5	1.07869	0.334295	2331	0.000635122	0.000685101	Coatomer subunit beta' OS=Paracoccidioides lutzii (strain ATCC MYA-826 / Pb01) OX=502779 GN=PAAG_06466 PE=3 SV=2
C1GQN3	1.07908	0.380485	2203	9.73043e-05	0.000104999	Uncharacterized protein OS=Paracoccidioides lutzii (strain ATCC MYA-826 / Pb01) OX=502779 GN=PAAG_00828 PE=4 SV=1
C1HB03	1.0791	0.293824	417	0.000165751	0.000178862	Uncharacterized protein OS=Paracoccidioides lutzii (strain ATCC MYA-826 / Pb01) OX=502779 GN=PAAG_07867 PE=4 SV=2
A0A0A2V318	1.07937	0.0600612	1245	0.00148089	0.00159843	Ribosomal protein L19 OS=Paracoccidioides lutzii (strain ATCC MYA-826 / Pb01) OX=502779 GN=PAAG_12568 PE=3 SV=1
C1GYW5	1.08002	0.346936	1680	0.000275807	0.000297876	5-formyltetrahydrofolate cyclo-ligase OS=Paracoccidioides lutzii (strain ATCC MYA-826 / Pb01) OX=502779 GN=PAAG_03709 PE=4 SV=1
C1GU31	1.08004	0.249277	118	0.000373933	0.000403862	Uncharacterized protein OS=Paracoccidioides lutzii (strain ATCC MYA-826 / Pb01) OX=502779 GN=PAAG_02026 PE=4 SV=1
C1GXQ3	1.08042	0.2417	63	0.000637003	0.00068823	Phenol 2-monooxygenase OS=Paracoccidioides lutzii (strain ATCC MYA-826 / Pb01) OX=502779 GN=PAAG_03627 PE=4 SV=2
C1GTP7	1.08081	0.418219	245	0.000118164	0.000127714	General negative regulator of transcription subunit 1 OS=Paracoccidioides lutzii (strain ATCC MYA-826 / Pb01) OX=502779 GN=PAAG_01892 PE=4 SV=1
C1GX73	1.08082	0.172269	1927	0.00120482	0.0013022	Acetyl-CoA acetyltransferase OS=Paracoccidioides lutzii (strain ATCC MYA-826 / Pb01) OX=502779 GN=PAAG_03447 PE=3 SV=1
C1GPQ8	1.08096	0.217214	1617	0.000902442	0.000975502	HAD-superfamily hydrolase OS=Paracoccidioides lutzii (strain ATCC MYA-826 / Pb01) OX=502779 GN=PAAG_00503 PE=4 SV=1
C1H198	1.08116	0.0686221	1270	0.00166015	0.00179489	Malate synthase OS=Paracoccidioides lutzii (strain ATCC MYA-826 / Pb01) OX=502779 GN=PAAG_04542 PE=3 SV=2
C1H307	1.08137	0.166936	1275	0.00167766	0.00181418	ATP-citrate synthase subunit 1 OS=Paracoccidioides lutzii (strain ATCC MYA-826 / Pb01) OX=502779 GN=PAAG_05150 PE=4 SV=1
A0A0A2V3C5	1.08185	0.216372	103	0.000470208	0.000508696	Mitochondrial outer membrane protein porin OS=Paracoccidioides lutzii (strain ATCC MYA-826 / Pb01) OX=502779 GN=PAAG_12425 PE=4 SV=1
C1HEB7	1.08227	0.172166	117	0.000360152	0.000389782	RPEL repeat protein OS=Paracoccidioides lutzii (strain ATCC MYA-826 / Pb01) OX=502779 GN=PAAG_09108 PE=4 SV=1
A0A0A2V4N1	1.08263	0.289992	1056	0.000262847	0.000284566	Argininosuccinate lyase OS=Paracoccidioides lutzii (strain ATCC MYA-826 / Pb01) OX=502779 GN=PAAG_12223 PE=4 SV=1
A0A0A2V289	1.08276	0.286815	418	0.000180034	0.000194934	IMP-specific 5'-nucleotidase 1 OS=Paracoccidioides lutzii (strain ATCC MYA-826 / Pb01) OX=502779 GN=PAAG_11311 PE=3 SV=1
C1GSA4	1.08331	0.223678	1873	0.000732539	0.00079357	NAD dependent epimerase/dehydratase family protein OS=Paracoccidioides lutzii (strain ATCC MYA-826 / Pb01) OX=502779 GN=PAAG_01399 PE=4 SV=1
C1GWJ9	1.0835	0.368798	888	0.000193717	0.000209892	(DL)-glycerol-3-phosphatase OS=Paracoccidioides lutzii (strain ATCC MYA-826 / Pb01) OX=502779 GN=PAAG_02894 PE=4 SV=1
C1HBB6	1.08373	0.195578	89	0.000457316	0.000495606	Cytochrome c oxidase polypeptide V OS=Paracoccidioides lutzii (strain ATCC MYA-826 / Pb01) OX=502779 GN=PAAG_08057 PE=4 SV=1
C1H9T5	1.08467	0.439805	2042	0.000118281	0.000128296	Polyadenylation factor subunit 2 OS=Paracoccidioides lutzii (strain ATCC MYA-826 / Pb01) OX=502779 GN=PAAG_07526 PE=4 SV=2
C1H7Z1	1.08468	0.209385	1292	0.000456915	0.000495606	40S ribosomal protein S24 OS=Paracoccidioides lutzii (strain ATCC MYA-826 / Pb01) OX=502779 GN=PAAG_06882 PE=3 SV=1
C1HCZ3	1.08501	0.0513874	325	0.000623236	0.000676217	40S ribosomal protein S12 OS=Paracoccidioides lutzii (strain ATCC MYA-826 / Pb01) OX=502779 GN=PAAG_08634 PE=3 SV=2
C1GS35	1.08504	0.291083	1111	0.0001561	0.000169375	Eukaryotic translation initiation factor 3 subunit G OS=Paracoccidioides lutzii (strain ATCC MYA-826 / Pb01) OX=502779 GN=TIF35 PE=3 SV=1
C1GUW3	1.08518	0.268641	1729	0.000138676	0.000150489	ATPase H+ transporting V1 subunit D OS=Paracoccidioides lutzii (strain ATCC MYA-826 / Pb01) OX=502779 GN=PAAG_02436 PE=4 SV=2
C1GWL7	1.08691	0.280219	491	0.000139311	0.000151419	Uncharacterized protein OS=Paracoccidioides lutzii (strain ATCC MYA-826 / Pb01) OX=502779 GN=PAAG_02912 PE=4 SV=1
C1H180	1.08712	0.336942	2340	0.000429406	0.000466815	Uncharacterized protein OS=Paracoccidioides lutzii (strain ATCC MYA-826 / Pb01) OX=502779 GN=PAAG_04524 PE=4 SV=2
C1GR08	1.08733	0.219349	1001	0.000609301	0.000662514	NADH-cytochrome b5 reductase OS=Paracoccidioides lutzii (strain ATCC MYA-826 / Pb01) OX=502779 GN=PAAG_00953 PE=3 SV=2
C1GZG6	1.08818	0.0159667	735	0.000692658	0.000753735	Aldehyde dehydrogenase OS=Paracoccidioides lutzii (strain ATCC MYA-826 / Pb01) OX=502779 GN=PAAG_03910 PE=3 SV=1
C1GSK5	1.08864	0.242923	973	0.000527478	0.000574232	GTP-binding protein SAS1 OS=Paracoccidioides lutzii (strain ATCC MYA-826 / Pb01) OX=502779 GN=PAAG_01500 PE=4 SV=1
C1GRY3	1.08943	0.237476	345	0.00069231	0.00075422	Karyopherin Kap123 OS=Paracoccidioides lutzii (strain ATCC MYA-826 / Pb01) OX=502779 GN=PAAG_01278 PE=4 SV=1
C1HAF1	1.08967	0.055471	697	0.00112216	0.00122279	Acetolactate synthase small subunit OS=Paracoccidioides lutzii (strain ATCC MYA-826 / Pb01) OX=502779 GN=PAAG_07605 PE=4 SV=1
C1H941	1.08969	0.278737	189	0.000179379	0.000195468	Splicing factor 3A subunit 3 OS=Paracoccidioides lutzii (strain ATCC MYA-826 / Pb01) OX=502779 GN=PAAG_07282 PE=4 SV=1
C1GRF2	1.09106	0.104002	978	0.000872023	0.000951427	Poly(RC)-binding protein OS=Paracoccidioides lutzii (strain ATCC MYA-826 / Pb01) OX=502779 GN=PAAG_01097 PE=4 SV=1
A0A0A2UZH0	1.0917	0.291192	2228	0.000165766	0.000180966	Uncharacterized protein OS=Paracoccidioides lutzii (strain ATCC MYA-826 / Pb01) OX=502779 GN=PAAG_12354 PE=4 SV=1
C1GSG2	1.09209	0.338505	1564	0.000594389	0.000649123	Uncharacterized protein OS=Paracoccidioides lutzii (strain ATCC MYA-826 / Pb01) OX=502779 GN=PAAG_01457 PE=4 SV=2
C1HBL0	1.09267	0.25247	403	0.000250348	0.000273547	VHS domain-containing protein OS=Paracoccidioides lutzii (strain ATCC MYA-826 / Pb01) OX=502779 GN=PAAG_08151 PE=4 SV=2
C1GVT8	1.0928	0.126063	1622	0.000595591	0.00065086	Ribose-phosphate pyrophosphokinase OS=Paracoccidioides lutzii (strain ATCC MYA-826 / Pb01) OX=502779 GN=PAAG_02633 PE=4 SV=2
C1GQI8	1.09293	0.211879	35	0.000773173	0.000845023	Serine/threonine-protein phosphatase OS=Paracoccidioides lutzii (strain ATCC MYA-826 / Pb01) OX=502779 GN=PAAG_00783 PE=3 SV=1
C1GXF6	1.09401	0.237221	383	0.000485184	0.000530798	Phosphoribosylamine-glycine ligase OS=Paracoccidioides lutzii (strain ATCC MYA-826 / Pb01) OX=502779 GN=PAAG_03530 PE=3 SV=1
C1HCC3	1.09402	0.368369	782	0.00024855	0.000271918	Histidinol-phosphatase OS=Paracoccidioides lutzii (strain ATCC MYA-826 / Pb01) OX=502779 GN=PAAG_08414 PE=3 SV=1
A0A0A2V3Q6	1.09542	0.182591	2287	0.00127086	0.00139212	Uncharacterized protein OS=Paracoccidioides lutzii (strain ATCC MYA-826 / Pb01) OX=502779 GN=PAAG_11057 PE=3 SV=1
C1GUN1	1.09646	0.135033	1559	0.000735476	0.000806419	Serine 3-dehydrogenase OS=Paracoccidioides lutzii (strain ATCC MYA-826 / Pb01) OX=502779 GN=PAAG_02354 PE=3 SV=2
C1H067	1.09723	0.133526	936	0.00137089	0.00150419	Uncharacterized protein OS=Paracoccidioides lutzii (strain ATCC MYA-826 / Pb01) OX=502779 GN=PAAG_04161 PE=4 SV=1
C1GWV7	1.09749	0.356915	1092	0.000179379	0.000196867	Uncharacterized protein OS=Paracoccidioides lutzii (strain ATCC MYA-826 / Pb01) OX=502779 GN=PAAG_03331 PE=4 SV=2
C1GPE0	1.09802	0.181608	1612	0.000748785	0.000822182	40S ribosomal protein S23 OS=Paracoccidioides lutzii (strain ATCC MYA-826 / Pb01) OX=502779 GN=PAAG_00385 PE=3 SV=1
C1GS26	1.09812	0.043335	13	0.00148035	0.0016256	Oxidoreductase 2-nitropropane dioxygenase family OS=Paracoccidioides lutzii (strain ATCC MYA-826 / Pb01) OX=502779 GN=PAAG_01321 PE=4 SV=2; Additional IDs concatenated into MaxParsimony group: Reverse_C1HCK4
C1GZN5	1.0994	0.24655	75	0.000623167	0.000685109	DNA damage-binding protein 1a OS=Paracoccidioides lutzii (strain ATCC MYA-826 / Pb01) OX=502779 GN=PAAG_03979 PE=4 SV=1
C1H9U4	1.1009	0.212236	1035	0.000401106	0.000441576	Uncharacterized protein OS=Paracoccidioides lutzii (strain ATCC MYA-826 / Pb01) OX=502779 GN=PAAG_07535 PE=4 SV=1
C1GQM0	1.1011	0.17623	67	0.000721528	0.000794473	Eukaryotic translation initiation factor 3 subunit A OS=Paracoccidioides lutzii (strain ATCC MYA-826 / Pb01) OX=502779 GN=TIF32 PE=3 SV=1
C1GNC8	1.10182	0.267877	1706	0.000236803	0.000260913	Sorting nexin-41 OS=Paracoccidioides lutzii (strain ATCC MYA-826 / Pb01) OX=502779 GN=PAAG_00023 PE=4 SV=1
C1GY91	1.10249	0.0589601	533	0.00135714	0.00149624	Aminomethyltransferase OS=Paracoccidioides lutzii (strain ATCC MYA-826 / Pb01) OX=502779 GN=PAAG_03045 PE=3 SV=2
C1GUW1	1.10254	0.14301	1305	0.000555359	0.000612308	Uncharacterized protein OS=Paracoccidioides lutzii (strain ATCC MYA-826 / Pb01) OX=502779 GN=PAAG_02434 PE=4 SV=2
C1GPH4	1.10281	0.349914	200	0.000153781	0.000169592	SNF2 family ATP-dependent chromatin-remodeling factor snf21 OS=Paracoccidioides lutzii (strain ATCC MYA-826 / Pb01) OX=502779 GN=PAAG_00419 PE=4 SV=2
C1H6W0	1.10286	0.336168	1396	0.000235841	0.000260099	Superoxide dismutase 1 copper chaperone OS=Paracoccidioides lutzii (strain ATCC MYA-826 / Pb01) OX=502779 GN=PAAG_06501 PE=4 SV=2
C1GY89	1.10294	0.174372	1626	0.000555681	0.000612884	Adenylyl-sulfate kinase OS=Paracoccidioides lutzii (strain ATCC MYA-826 / Pb01) OX=502779 GN=PAAG_03043 PE=3 SV=1
A0A0A2VJH9	1.10332	0.368063	394	0.000292985	0.000323256	Uncharacterized protein OS=Paracoccidioides lutzii (strain ATCC MYA-826 / Pb01) OX=502779 GN=PAAG_12242 PE=4 SV=1
A0A0A2V5C7	1.10353	0.143669	2329	0.00063625	0.00070212	Uncharacterized protein OS=Paracoccidioides lutzii (strain ATCC MYA-826 / Pb01) OX=502779 GN=PAAG_11932 PE=4 SV=1
C1GTD3	1.10371	0.338939	1006	0.000152861	0.000168713	Peptidyl-prolyl cis-trans isomerase OS=Paracoccidioides lutzii (strain ATCC MYA-826 / Pb01) OX=502779 GN=PAAG_01778 PE=3 SV=1
C1GVE2	1.1041	0.183007	2290	0.00055465	0.000612387	Thiamine-phosphate pyrophosphorylase OS=Paracoccidioides lutzii (strain ATCC MYA-826 / Pb01) OX=502779 GN=PAAG_02219 PE=3 SV=1
C1GPN6	1.10441	0.292128	2043	0.000165919	0.000183242	Protein YOP1 OS=Paracoccidioides lutzii (strain ATCC MYA-826 / Pb01) OX=502779 GN=PAAG_00481 PE=3 SV=2
C1HA84	1.10454	0.037275	710	0.00102596	0.00113321	Cysteine synthase OS=Paracoccidioides lutzii (strain ATCC MYA-826 / Pb01) OX=502779 GN=PAAG_07813 PE=4 SV=1
C1HE52	1.10475	0.18253	339	0.000484728	0.000535504	Eukaryotic translation initiation factor 4E-1 OS=Paracoccidioides lutzii (strain ATCC MYA-826 / Pb01) OX=502779 GN=PAAG_09045 PE=3 SV=1
C1H6P0	1.10517	0.14548	548	0.0010009	0.00110616	Ornithine aminotransferase OS=Paracoccidioides lutzii (strain ATCC MYA-826 / Pb01) OX=502779 GN=PAAG_06431 PE=3 SV=2
C1GW72	1.1075	0.0623463	1336	0.000388063	0.00042978	ATFPG-1/ATFPG-2/ATMMH-1/ATMMH-2/FPG-1/FPG-2-like protein OS=Paracoccidioides lutzii (strain ATCC MYA-826 / Pb01) OX=502779 GN=PAAG_02767 PE=4 SV=2
C1GR31	1.10847	0.243753	1048	0.000292527	0.000324258	LiPid Depleted family member OS=Paracoccidioides lutzii (strain ATCC MYA-826 / Pb01) OX=502779 GN=PAAG_00976 PE=4 SV=2
C1H6M5	1.10856	0.087679	1645	0.000458125	0.000507859	Pyridoxal phosphate homeostasis protein OS=Paracoccidioides lutzii (strain ATCC MYA-826 / Pb01) OX=502779 GN=PAAG_06416 PE=3 SV=1
C1HEC7	1.10908	0.239114	435	0.000188604	0.000209177	Nicotinate phosphoribosyltransferase OS=Paracoccidioides lutzii (strain ATCC MYA-826 / Pb01) OX=502779 GN=PAAG_09118 PE=3 SV=1
C1H3J5	1.10926	0.176167	998	0.000596536	0.000661714	Importin subunit beta-1 OS=Paracoccidioides lutzii (strain ATCC MYA-826 / Pb01) OX=502779 GN=PAAG_05338 PE=4 SV=1
C1HBZ4	1.10937	0.338203	840	0.000140829	0.000156232	50S ribosomal protein L12 OS=Paracoccidioides lutzii (strain ATCC MYA-826 / Pb01) OX=502779 GN=PAAG_08285 PE=3 SV=1
C1H2X7	1.10958	0.121093	1002	0.000691097	0.000766828	Coatomer subunit gamma OS=Paracoccidioides lutzii (strain ATCC MYA-826 / Pb01) OX=502779 GN=PAAG_05120 PE=3 SV=1
C1H0N3	1.10967	0.0518675	1619	0.0009852	0.00109325	Ubiquitin carboxyl-terminal hydrolase OS=Paracoccidioides lutzii (strain ATCC MYA-826 / Pb01) OX=502779 GN=PAAG_04327 PE=3 SV=2
C1GSJ9	1.10968	0.282857	1023	0.000304845	0.000338279	NADH-ubiquinone oxidoreductase 21 kDa subunit OS=Paracoccidioides lutzii (strain ATCC MYA-826 / Pb01) OX=502779 GN=PAAG_01494 PE=4 SV=1
C1HB42	1.11003	0.37471	180	0.000208998	0.000231994	Ribonuclease H OS=Paracoccidioides lutzii (strain ATCC MYA-826 / Pb01) OX=502779 GN=PAAG_07983 PE=4 SV=1
C1H240	1.11162	0.221828	1863	0.00076035	0.000845221	Cleavage and polyadenylation specificity factor subunit A OS=Paracoccidioides lutzii (strain ATCC MYA-826 / Pb01) OX=502779 GN=PAAG_04670 PE=4 SV=1
C1GVH7	1.11212	0.32863	1041	0.000233682	0.000259882	Ubiquitin carboxyl-terminal hydrolase OS=Paracoccidioides lutzii (strain ATCC MYA-826 / Pb01) OX=502779 GN=PAAG_02254 PE=3 SV=1
C1GZQ6	1.11216	0.263492	1356	0.000375479	0.000417592	Uncharacterized protein OS=Paracoccidioides lutzii (strain ATCC MYA-826 / Pb01) OX=502779 GN=PAAG_04000 PE=4 SV=2
C1H1W7	1.11329	0.229995	1387	0.000304928	0.000339475	NAD dependent epimerase/dehydratase family protein OS=Paracoccidioides lutzii (strain ATCC MYA-826 / Pb01) OX=502779 GN=PAAG_04903 PE=4 SV=1
C1GXS6	1.11488	0.104254	1247	0.00102547	0.00114327	WD repeat-containing protein OS=Paracoccidioides lutzii (strain ATCC MYA-826 / Pb01) OX=502779 GN=PAAG_03649 PE=4 SV=2
C1GZN4	1.1152	0.115704	942	0.000898612	0.00100213	3-hydroxyisobutyrate dehydrogenase OS=Paracoccidioides lutzii (strain ATCC MYA-826 / Pb01) OX=502779 GN=PAAG_03978 PE=4 SV=1
C1GQU4	1.11538	0.0894352	1601	0.00113504	0.00126599	Phosphomannomutase OS=Paracoccidioides lutzii (strain ATCC MYA-826 / Pb01) OX=502779 GN=PAAG_00889 PE=3 SV=1
C1H5W2	1.11546	0.128589	997	0.000525584	0.000586267	Branched-chain-amino-acid aminotransferase OS=Paracoccidioides lutzii (strain ATCC MYA-826 / Pb01) OX=502779 GN=PAAG_06072 PE=4 SV=1
C1GU69	1.11559	0.147729	799	0.000290981	0.000324616	Uncharacterized protein OS=Paracoccidioides lutzii (strain ATCC MYA-826 / Pb01) OX=502779 GN=PAAG_02064 PE=4 SV=1
C1GSP4	1.11732	0.251247	2324	0.000429405	0.000479784	Uncharacterized protein OS=Paracoccidioides lutzii (strain ATCC MYA-826 / Pb01) OX=502779 GN=PAAG_01539 PE=4 SV=2
C1GY13	1.11813	0.0293768	696	0.00124587	0.00139305	3-isopropylmalate dehydratase OS=Paracoccidioides lutzii (strain ATCC MYA-826 / Pb01) OX=502779 GN=PAAG_03296 PE=3 SV=2
C1H9E5	1.11817	0.1946	2186	0.000221643	0.000247835	Uncharacterized protein OS=Paracoccidioides lutzii (strain ATCC MYA-826 / Pb01) OX=502779 GN=PAAG_07386 PE=3 SV=1
C1H302	1.11852	0.252591	767	0.000454295	0.000508138	NEDD8-activating enzyme E1 regulatory subunit OS=Paracoccidioides lutzii (strain ATCC MYA-826 / Pb01) OX=502779 GN=PAAG_05145 PE=3 SV=2
C1H2N6	1.11932	0.175355	361	0.000442936	0.000495785	26S proteasome regulatory subunit RPN9 OS=Paracoccidioides lutzii (strain ATCC MYA-826 / Pb01) OX=502779 GN=PAAG_05029 PE=4 SV=1
C1GUS1	1.11944	0.400842	128	0.000137907	0.000154378	37S ribosomal protein S5 OS=Paracoccidioides lutzii (strain ATCC MYA-826 / Pb01) OX=502779 GN=PAAG_02394 PE=3 SV=1
C1HDK4	1.12037	0.190606	884	0.000139311	0.000156079	Uncharacterized protein OS=Paracoccidioides lutzii (strain ATCC MYA-826 / Pb01) OX=502779 GN=PAAG_08845 PE=4 SV=2
C1H1M4	1.12087	0.368249	853	0.000138661	0.000155421	Endoplasmic oxidoreductin-1 OS=Paracoccidioides lutzii (strain ATCC MYA-826 / Pb01) OX=502779 GN=PAAG_04810 PE=4 SV=2
A0A0A2VIV7	1.12093	0.185213	195	0.000220905	0.000247618	Uncharacterized protein OS=Paracoccidioides lutzii (strain ATCC MYA-826 / Pb01) OX=502779 GN=PAAG_12482 PE=4 SV=1
C1GST0	1.12139	0.283221	1655	0.000289491	0.000324631	Sterol 24-C-methyltransferase OS=Paracoccidioides lutzii (strain ATCC MYA-826 / Pb01) OX=502779 GN=PAAG_01575 PE=3 SV=1
C1GNL5	1.1214	0.282042	1068	0.000290981	0.000326306	Uncharacterized protein OS=Paracoccidioides lutzii (strain ATCC MYA-826 / Pb01) OX=502779 GN=PAAG_00110 PE=4 SV=2
C1H008	1.12157	0.035438	702	0.00099707	0.00111829	Isovaleryl-CoA dehydrogenase OS=Paracoccidioides lutzii (strain ATCC MYA-826 / Pb01) OX=502779 GN=PAAG_04102 PE=3 SV=2
C1GXQ0	1.12179	0.246546	756	0.000486883	0.000546181	Arp2/3 complex subunit Arc16 OS=Paracoccidioides lutzii (strain ATCC MYA-826 / Pb01) OX=502779 GN=PAAG_03624 PE=4 SV=1
C1H7F4	1.122	0.271195	2249	0.000208844	0.000234323	Uncharacterized protein OS=Paracoccidioides lutzii (strain ATCC MYA-826 / Pb01) OX=502779 GN=PAAG_06695 PE=4 SV=1
C1GRP1	1.12234	0.331955	871	0.000137854	0.000154719	Cell division control protein OS=Paracoccidioides lutzii (strain ATCC MYA-826 / Pb01) OX=502779 GN=PAAG_01186 PE=3 SV=1
C1GPX8	1.12331	0.257652	2035	6.93382e-05	7.78882e-05	Uncharacterized protein OS=Paracoccidioides lutzii (strain ATCC MYA-826 / Pb01) OX=502779 GN=PAAG_00573 PE=4 SV=2
C1H3A6	1.1236	0.0186276	516	0.00250917	0.00281932	Aldehyde dehydrogenase OS=Paracoccidioides lutzii (strain ATCC MYA-826 / Pb01) OX=502779 GN=PAAG_05249 PE=3 SV=2
C1HAL1	1.12374	0.270336	1293	0.000511915	0.00057526	4-coumarate-CoA ligase OS=Paracoccidioides lutzii (strain ATCC MYA-826 / Pb01) OX=502779 GN=PAAG_07665 PE=4 SV=1
C1GUE4	1.1243	0.266289	555	0.000193008	0.000217	Methyltransferase family OS=Paracoccidioides lutzii (strain ATCC MYA-826 / Pb01) OX=502779 GN=PAAG_02139 PE=4 SV=2
C1GP95	1.12453	0.0797885	990	0.000566759	0.000637336	Uncharacterized protein OS=Paracoccidioides lutzii (strain ATCC MYA-826 / Pb01) OX=502779 GN=PAAG_00340 PE=4 SV=1
C1HAB6	1.12487	0.297548	388	0.000358714	0.000403507	MSP domain-containing protein OS=Paracoccidioides lutzii (strain ATCC MYA-826 / Pb01) OX=502779 GN=PAAG_07570 PE=4 SV=2
C1H489	1.1254	0.180404	1570	0.000278022	0.000312884	Uncharacterized protein OS=Paracoccidioides lutzii (strain ATCC MYA-826 / Pb01) OX=502779 GN=PAAG_05582 PE=4 SV=2
C1GSS3	1.12565	0.00449113	1287	0.00146948	0.00165412	Glycine cleavage system P protein OS=Paracoccidioides lutzii (strain ATCC MYA-826 / Pb01) OX=502779 GN=PAAG_01568 PE=3 SV=2
C1GQ96	1.12808	0.307522	1155	0.000138676	0.000156438	Fumarylacetoacetate hydrolase domain-containing protein OS=Paracoccidioides lutzii (strain ATCC MYA-826 / Pb01) OX=502779 GN=PAAG_00691 PE=4 SV=2
A0A0A2UZL6	1.12808	0.0435499	758	0.000471906	0.000532349	26S proteasome regulatory subunit rpn11 OS=Paracoccidioides lutzii (strain ATCC MYA-826 / Pb01) OX=502779 GN=PAAG_12272 PE=4 SV=1
C1H416	1.12826	0.234621	410	0.000208182	0.000234884	26S proteasome non-ATPase regulatory subunit 11 OS=Paracoccidioides lutzii (strain ATCC MYA-826 / Pb01) OX=502779 GN=PAAG_05509 PE=4 SV=1
A0A0A2V2X4	1.12926	0.0173968	2258	0.00265107	0.00299373	Elongation factor 1-alpha OS=Paracoccidioides lutzii (strain ATCC MYA-826 / Pb01) OX=502779 GN=PAAG_11418 PE=3 SV=1
C1GZQ0	1.13018	0.147547	2205	0.000276531	0.000312529	Uncharacterized protein OS=Paracoccidioides lutzii (strain ATCC MYA-826 / Pb01) OX=502779 GN=PAAG_03994 PE=4 SV=2
C1H099	1.13039	0.0923658	2308	0.000873219	0.000987082	Cysteinyl-tRNA synthetase OS=Paracoccidioides lutzii (strain ATCC MYA-826 / Pb01) OX=502779 GN=PAAG_04193 PE=3 SV=2
C1GXT6	1.13084	0.151802	2307	0.000597608	0.000675797	Protein kinase gsk3 OS=Paracoccidioides lutzii (strain ATCC MYA-826 / Pb01) OX=502779 GN=PAAG_03659 PE=3 SV=1
C1GNM8	1.13092	0.389478	2217	8.75774e-05	9.90426e-05	30S ribosomal protein S10 OS=Paracoccidioides lutzii (strain ATCC MYA-826 / Pb01) OX=502779 GN=PAAG_00123 PE=3 SV=2
C1GRH8	1.13094	0.0831978	957	0.00127792	0.00144524	Retrograde regulation protein OS=Paracoccidioides lutzii (strain ATCC MYA-826 / Pb01) OX=502779 GN=PAAG_01123 PE=4 SV=2
A0A0A2UZ74	1.13301	0.265137	442	6.93382e-05	7.85611e-05	Uncharacterized protein OS=Paracoccidioides lutzii (strain ATCC MYA-826 / Pb01) OX=502779 GN=PAAG_12424 PE=4 SV=1
C1GWX9	1.13323	0.274733	193	0.000113243	0.00012833	Uncharacterized protein OS=Paracoccidioides lutzii (strain ATCC MYA-826 / Pb01) OX=502779 GN=PAAG_03353 PE=4 SV=2
C1GVU9	1.13341	0.180707	316	0.000817457	0.000926516	Kynurenine-oxoglutarate transaminase OS=Paracoccidioides lutzii (strain ATCC MYA-826 / Pb01) OX=502779 GN=PAAG_02644 PE=4 SV=2
A0A0A2V1X7	1.13581	0.126922	1320	0.000538962	0.000612158	Protein disulfide-isomerase domain OS=Paracoccidioides lutzii (strain ATCC MYA-826 / Pb01) OX=502779 GN=PAAG_11504 PE=3 SV=1
C1H1H6	1.13582	0.254282	1998	0.000537876	0.000610929	Importin alpha re-exporter OS=Paracoccidioides lutzii (strain ATCC MYA-826 / Pb01) OX=502779 GN=PAAG_04620 PE=4 SV=1
C1GNW1	1.13666	0.255131	813	0.000137953	0.000156805	40S ribosomal protein S30 OS=Paracoccidioides lutzii (strain ATCC MYA-826 / Pb01) OX=502779 GN=PAAG_00206 PE=3 SV=2
C1H2U4	1.13686	0.0300086	1549	0.000984556	0.0011193	Uncharacterized protein OS=Paracoccidioides lutzii (strain ATCC MYA-826 / Pb01) OX=502779 GN=PAAG_05087 PE=4 SV=2
C1GSN9	1.13772	0.0198565	2300	0.0011786	0.00134091	Pyruvate dehydrogenase E1 component subunit beta OS=Paracoccidioides lutzii (strain ATCC MYA-826 / Pb01) OX=502779 GN=PAAG_01534 PE=4 SV=1
contaminant_GR78_MAIZE	1.13901	0.369161	928	0.0002069	0.000235661	IMMUNOGLOBULIN BINDING PROTEIN HOMOLOG B70 (HEAT SHOCK PROTEIN...
C1HC04	1.13919	0.00914731	1913	0.00182917	0.00208377	Pyruvate dehydrogenase E1 component subunit alpha OS=Paracoccidioides lutzii (strain ATCC MYA-826 / Pb01) OX=502779 GN=PAAG_08295 PE=4 SV=1
C1H1Z2	1.13997	0.39494	2046	9.25942e-05	0.000105555	Uncharacterized protein OS=Paracoccidioides lutzii (strain ATCC MYA-826 / Pb01) OX=502779 GN=PAAG_04928 PE=4 SV=1
C1H986	1.14016	0.208287	154	0.000194316	0.000221551	Arginine biosynthesis bifunctional protein ArgJ, mitochondrial OS=Paracoccidioides lutzii (strain ATCC MYA-826 / Pb01) OX=502779 GN=PAAG_07327 PE=3 SV=1
C1GSP1	1.14028	0.0704152	1313	0.000718728	0.00081955	Trans-2-enoyl-CoA reductase OS=Paracoccidioides lutzii (strain ATCC MYA-826 / Pb01) OX=502779 GN=PAAG_01536 PE=4 SV=1
C1GWL8	1.14039	0.17978	419	0.000125063	0.00014262	Mitochondrial hypoxia responsive domain-containing protein OS=Paracoccidioides lutzii (strain ATCC MYA-826 / Pb01) OX=502779 GN=PAAG_02913 PE=4 SV=1
C1HCE7	1.14054	0.180765	1890	0.000456968	0.000521192	Purine nucleoside phosphorylase OS=Paracoccidioides lutzii (strain ATCC MYA-826 / Pb01) OX=502779 GN=PAAG_08438 PE=3 SV=2
C1GTA5	1.14101	0.229344	2311	0.000818376	0.000933775	Vacuolar protein sorting/targeting protein 10 OS=Paracoccidioides lutzii (strain ATCC MYA-826 / Pb01) OX=502779 GN=VPS10 PE=3 SV=1
C1GVL7	1.14107	0.362129	2255	0.000136817	0.000156117	Pyridoxamine 5'-phosphate oxidase OS=Paracoccidioides lutzii (strain ATCC MYA-826 / Pb01) OX=502779 GN=PAAG_02294 PE=4 SV=1
C1GNL1	1.14145	0.182111	341	0.000457386	0.000522085	Histone acetyltransferase type B catalytic subunit OS=Paracoccidioides lutzii (strain ATCC MYA-826 / Pb01) OX=502779 GN=PAAG_00106 PE=3 SV=2
C1H9J0	1.14184	0.18211	2289	0.000872981	0.000996803	UDP-glucose:glycoprotein glucosyltransferase OS=Paracoccidioides lutzii (strain ATCC MYA-826 / Pb01) OX=502779 GN=PAAG_07431 PE=4 SV=1
C1GUN8	1.14207	0.163027	2321	0.000501418	0.000572657	D-amino-acid oxidase OS=Paracoccidioides lutzii (strain ATCC MYA-826 / Pb01) OX=502779 GN=PAAG_02361 PE=4 SV=2
C1GZK8	1.14304	0.0682027	1297	0.000956575	0.0010934	T-complex protein 1 subunit alpha OS=Paracoccidioides lutzii (strain ATCC MYA-826 / Pb01) OX=502779 GN=PAAG_03952 PE=3 SV=1
C1H4Z1	1.14311	0.240318	2327	0.000431423	0.000493165	Eukaryotic translation initiation factor 2 subunit alpha OS=Paracoccidioides lutzii (strain ATCC MYA-826 / Pb01) OX=502779 GN=PAAG_05832 PE=4 SV=1
C1GVR8	1.14312	0.254297	1067	0.000263571	0.000301293	Geranylgeranyl transferase type-2 subunit alpha OS=Paracoccidioides lutzii (strain ATCC MYA-826 / Pb01) OX=502779 GN=PAAG_02613 PE=4 SV=2
C1GYF5	1.14339	0.343843	2058	0.000137418	0.000157122	tRNA (guanine-N(7)-)-methyltransferase OS=Paracoccidioides lutzii (strain ATCC MYA-826 / Pb01) OX=502779 GN=TRM8 PE=3 SV=2
C1GWD6	1.14415	0.304424	1675	0.000305403	0.000349429	Casein kinase II subunit beta OS=Paracoccidioides lutzii (strain ATCC MYA-826 / Pb01) OX=502779 GN=PAAG_02831 PE=3 SV=2
C1HB13	1.14432	0.0301489	717	0.000705951	0.000807832	Gamma-glutamyl phosphate reductase OS=Paracoccidioides lutzii (strain ATCC MYA-826 / Pb01) OX=502779 GN=PAAG_07954 PE=3 SV=2
C1H8F7	1.14464	0.0725551	1633	0.000443049	0.000507133	Short chain dehydrogenase/reductase family OS=Paracoccidioides lutzii (strain ATCC MYA-826 / Pb01) OX=502779 GN=PAAG_06953 PE=4 SV=2
C1H564	1.14504	0.242939	790	0.000194386	0.000222579	Uncharacterized protein OS=Paracoccidioides lutzii (strain ATCC MYA-826 / Pb01) OX=502779 GN=PAAG_05905 PE=4 SV=2
C1H0I0	1.14734	0.172118	2332	0.000249387	0.000286132	Uncharacterized protein OS=Paracoccidioides lutzii (strain ATCC MYA-826 / Pb01) OX=502779 GN=PAAG_04274 PE=4 SV=1
C1H9R5	1.14789	0.118192	83	0.000499009	0.000572807	Nuclear cap-binding protein subunit 2 OS=Paracoccidioides lutzii (strain ATCC MYA-826 / Pb01) OX=502779 GN=PAAG_07506 PE=3 SV=1
C1GVR3	1.14813	0.0843155	1044	0.000305319	0.000350546	Uncharacterized protein OS=Paracoccidioides lutzii (strain ATCC MYA-826 / Pb01) OX=502779 GN=PAAG_02608 PE=4 SV=1
C1GPZ9	1.14819	0.00255653	1580	0.0039369	0.00452032	Elongation factor 2 OS=Paracoccidioides lutzii (strain ATCC MYA-826 / Pb01) OX=502779 GN=PAAG_00594 PE=4 SV=2
C1HCV6	1.14827	0.0887146	2180	0.000318056	0.000365213	Thymidylate synthase OS=Paracoccidioides lutzii (strain ATCC MYA-826 / Pb01) OX=502779 GN=PAAG_08597 PE=3 SV=1
C1H5E3	1.14833	0.158682	52	0.000678834	0.000779523	Glutaryl-CoA dehydrogenase OS=Paracoccidioides lutzii (strain ATCC MYA-826 / Pb01) OX=502779 GN=PAAG_05984 PE=3 SV=1
A0A0A2V0U6	1.14854	0.234391	110	0.000247896	0.000284719	Uncharacterized protein OS=Paracoccidioides lutzii (strain ATCC MYA-826 / Pb01) OX=502779 GN=PAAG_12156 PE=4 SV=1
C1H665	1.1493	0.00696598	334	0.000498996	0.000573495	Peroxiredoxin OS=Paracoccidioides lutzii (strain ATCC MYA-826 / Pb01) OX=502779 GN=PAAG_06175 PE=3 SV=1
C1GRY5	1.14939	0.0293041	37	0.0011218	0.00128938	Ser/Thr protein phosphatase family protein OS=Paracoccidioides lutzii (strain ATCC MYA-826 / Pb01) OX=502779 GN=PAAG_01280 PE=4 SV=2
C1GS70	1.14943	0.0380497	1958	0.000804077	0.000924231	Choline dehydrogenase OS=Paracoccidioides lutzii (strain ATCC MYA-826 / Pb01) OX=502779 GN=PAAG_01365 PE=4 SV=1
C1HDU8	1.15009	0.0861459	781	0.000305264	0.00035108	DUF52 domain-containing protein OS=Paracoccidioides lutzii (strain ATCC MYA-826 / Pb01) OX=502779 GN=PAAG_08941 PE=3 SV=1
C1GXV2	1.15186	0.0595806	1069	0.000248718	0.000286487	Lysophospholipase OS=Paracoccidioides lutzii (strain ATCC MYA-826 / Pb01) OX=502779 GN=PAAG_03235 PE=3 SV=2
C1GR07	1.15198	0.222695	2309	0.000704588	0.000811669	60S ribosomal protein L20 OS=Paracoccidioides lutzii (strain ATCC MYA-826 / Pb01) OX=502779 GN=PAAG_00952 PE=3 SV=2
C1HB64	1.153	0.274921	1892	0.000125048	0.00014418	Uncharacterized protein OS=Paracoccidioides lutzii (strain ATCC MYA-826 / Pb01) OX=502779 GN=PAAG_08005 PE=4 SV=1
C1GPW9	1.15301	0.0597159	58	0.000608062	0.000701103	Actin OS=Paracoccidioides lutzii (strain ATCC MYA-826 / Pb01) OX=502779 GN=PAAG_00564 PE=3 SV=2
C1GZ28	1.1549	0.179501	1705	0.000124394	0.000143662	Mitochondrial import inner membrane translocase subunit tim9 OS=Paracoccidioides lutzii (strain ATCC MYA-826 / Pb01) OX=502779 GN=PAAG_03772 PE=4 SV=1
C1H016	1.15519	0.0151977	1557	0.000721125	0.000833036	Dolichyl-diphosphooligosaccharide--protein glycosyltransferase subunit WBP1 OS=Paracoccidioides lutzii (strain ATCC MYA-826 / Pb01) OX=502779 GN=PAAG_04110 PE=3 SV=1
C1H999	1.1555	0.346372	415	0.00014011	0.000161897	Mannosyltransferase OS=Paracoccidioides lutzii (strain ATCC MYA-826 / Pb01) OX=502779 GN=PAAG_07340 PE=3 SV=2
A0A0A2UZ57	1.15558	0.213778	1391	0.000306057	0.000353674	Uncharacterized protein OS=Paracoccidioides lutzii (strain ATCC MYA-826 / Pb01) OX=502779 GN=PAAG_12449 PE=4 SV=1
C1HDF6	1.15681	0.0324742	1607	0.00113562	0.0013137	GMP synthase OS=Paracoccidioides lutzii (strain ATCC MYA-826 / Pb01) OX=502779 GN=PAAG_08797 PE=3 SV=1
C1GS41	1.15818	0.219283	71	0.00046983	0.000544148	Long-chain-fatty-acid-CoA ligase OS=Paracoccidioides lutzii (strain ATCC MYA-826 / Pb01) OX=502779 GN=PAAG_01336 PE=4 SV=2
A0A0A2UZB0	1.15819	0.122337	307	0.000665889	0.000771228	T-complex protein 1, zeta subunit OS=Paracoccidioides lutzii (strain ATCC MYA-826 / Pb01) OX=502779 GN=PAAG_12391 PE=4 SV=1
C1H9W0	1.1586	0.308421	1488	7.04146e-05	8.15824e-05	Uncharacterized protein OS=Paracoccidioides lutzii (strain ATCC MYA-826 / Pb01) OX=502779 GN=PAAG_07551 PE=4 SV=2
C1GXJ5	1.15901	0.0926092	41	0.000650198	0.000753585	1,2-dihydroxy-3-keto-5-methylthiopentene dioxygenase OS=Paracoccidioides lutzii (strain ATCC MYA-826 / Pb01) OX=502779 GN=ADI1 PE=3 SV=1
C1GYZ5	1.15901	0.260669	841	0.000303035	0.000351221	CobW domain-containing protein OS=Paracoccidioides lutzii (strain ATCC MYA-826 / Pb01) OX=502779 GN=PAAG_03739 PE=4 SV=1
C1GW23	1.16053	0.0150721	1563	0.000694105	0.000805529	Mannose-1-phosphate guanyltransferase OS=Paracoccidioides lutzii (strain ATCC MYA-826 / Pb01) OX=502779 GN=PAAG_02718 PE=4 SV=2
C1H8F2	1.16065	0.100765	681	0.0011113	0.00128983	Mitogen-activated protein kinase OS=Paracoccidioides lutzii (strain ATCC MYA-826 / Pb01) OX=502779 GN=PAAG_06948 PE=3 SV=2
C1GQE4	1.16132	0.00891334	1546	0.000290981	0.000337923	Peptidyl-prolyl cis-trans isomerase OS=Paracoccidioides lutzii (strain ATCC MYA-826 / Pb01) OX=502779 GN=PAAG_00739 PE=3 SV=1
C1GT82	1.16187	0.0490939	724	0.000650379	0.000755653	T-complex protein 1 subunit delta OS=Paracoccidioides lutzii (strain ATCC MYA-826 / Pb01) OX=502779 GN=PAAG_01727 PE=3 SV=2
C1GV84	1.16256	0.273584	2253	8.29668e-05	9.64535e-05	CRAL/TRIO domain-containing protein OS=Paracoccidioides lutzii (strain ATCC MYA-826 / Pb01) OX=502779 GN=PAAG_02557 PE=4 SV=1
C1GNL4	1.1627	0.150719	2194	0.000152959	0.000177845	Mitochondrial intermembrane space translocase subunit Tim OS=Paracoccidioides lutzii (strain ATCC MYA-826 / Pb01) OX=502779 GN=PAAG_00109 PE=3 SV=1
C1HBU6	1.16351	0.0877598	2173	0.000291635	0.000339322	Signal recognition particle subunit SRP72 OS=Paracoccidioides lutzii (strain ATCC MYA-826 / Pb01) OX=502779 GN=PAAG_08237 PE=3 SV=1
C1GT02	1.16382	0.0595729	691	0.00137273	0.00159761	Tubulin alpha chain OS=Paracoccidioides lutzii (strain ATCC MYA-826 / Pb01) OX=502779 GN=PAAG_01647 PE=3 SV=1
C1H9H1	1.16397	0.0105871	1243	0.00143951	0.00167555	Serine hydroxymethyltransferase OS=Paracoccidioides lutzii (strain ATCC MYA-826 / Pb01) OX=502779 GN=PAAG_07412 PE=3 SV=1
C1H3R3	1.16429	0.00173732	1272	0.0018565	0.0021615	Histidine biosynthesis trifunctional protein OS=Paracoccidioides lutzii (strain ATCC MYA-826 / Pb01) OX=502779 GN=PAAG_05406 PE=3 SV=1
A0A0A2V435	1.16442	0.0970086	760	0.00041376	0.000481791	Uncharacterized protein OS=Paracoccidioides lutzii (strain ATCC MYA-826 / Pb01) OX=502779 GN=PAAG_12155 PE=4 SV=1
C1H328	1.16635	0.160196	2004	0.000234936	0.000274018	Peptidyl-prolyl cis-trans isomerase OS=Paracoccidioides lutzii (strain ATCC MYA-826 / Pb01) OX=502779 GN=PAAG_05171 PE=3 SV=2
C1GSD0	1.16714	0.0226489	1653	0.000401677	0.000468813	Eukaryotic translation initiation factor 3 subunit L OS=Paracoccidioides lutzii (strain ATCC MYA-826 / Pb01) OX=502779 GN=PAAG_01425 PE=3 SV=1
C1GPP3	1.16739	0.252403	127	0.000167311	0.000195318	DNA damage tolerance protein rad31 OS=Paracoccidioides lutzii (strain ATCC MYA-826 / Pb01) OX=502779 GN=PAAG_00488 PE=4 SV=2
C1GRL2	1.16766	0.112079	440	0.000189422	0.000221181	CwfJ domain-containing protein OS=Paracoccidioides lutzii (strain ATCC MYA-826 / Pb01) OX=502779 GN=PAAG_01157 PE=4 SV=1
C1H304	1.16957	0.0449217	332	0.000677819	0.000792754	Mitotic checkpoint protein BUB3 OS=Paracoccidioides lutzii (strain ATCC MYA-826 / Pb01) OX=502779 GN=PAAG_05147 PE=4 SV=1
C1H272	1.16966	0.15785	1312	0.000567261	0.000663504	Cystathionine gamma-lyase OS=Paracoccidioides lutzii (strain ATCC MYA-826 / Pb01) OX=502779 GN=PAAG_04701 PE=3 SV=1
C1HD01	1.17058	0.161196	1722	0.000166573	0.000194986	Inosine-uridine preferring nucleoside hydrolase OS=Paracoccidioides lutzii (strain ATCC MYA-826 / Pb01) OX=502779 GN=PAAG_08642 PE=4 SV=2
C1HE59	1.17059	0.0203212	59	0.000609538	0.00071352	DnaJ domain protein OS=Paracoccidioides lutzii (strain ATCC MYA-826 / Pb01) OX=502779 GN=PAAG_09056 PE=4 SV=2
A0A0A2V316	1.17095	0.259016	2192	0.000346037	0.000405192	Uncharacterized protein OS=Paracoccidioides lutzii (strain ATCC MYA-826 / Pb01) OX=502779 GN=PAAG_12581 PE=4 SV=1
C1H859	1.17105	0.0339931	1246	0.00127706	0.0014955	Methylmalonate-semialdehyde dehydrogenase OS=Paracoccidioides lutzii (strain ATCC MYA-826 / Pb01) OX=502779 GN=PAAG_07036 PE=4 SV=1
C1H7J0	1.17169	0.178578	160	0.000110863	0.000129897	Uncharacterized protein OS=Paracoccidioides lutzii (strain ATCC MYA-826 / Pb01) OX=502779 GN=PAAG_06731 PE=4 SV=2
C1GW03	1.1727	0.257646	1124	0.000111602	0.000130876	Uncharacterized protein OS=Paracoccidioides lutzii (strain ATCC MYA-826 / Pb01) OX=502779 GN=PAAG_02698 PE=4 SV=2
C1GWT5	1.17304	0.170862	721	0.000667795	0.000783351	Suaprga1 OS=Paracoccidioides lutzii (strain ATCC MYA-826 / Pb01) OX=502779 GN=PAAG_03309 PE=4 SV=2
C1GNT9	1.17421	0.0325687	1668	0.000277353	0.000325671	Uncharacterized protein OS=Paracoccidioides lutzii (strain ATCC MYA-826 / Pb01) OX=502779 GN=PAAG_00184 PE=4 SV=2
C1H7N5	1.17496	0.103186	1020	0.00044277	0.000520238	Peptide methionine sulfoxide reductase msrA OS=Paracoccidioides lutzii (strain ATCC MYA-826 / Pb01) OX=502779 GN=PAAG_06776 PE=3 SV=1
C1H120	1.17798	0.180047	1673	0.000373948	0.000440504	Glutamine-dependent NAD(+) synthetase OS=Paracoccidioides lutzii (strain ATCC MYA-826 / Pb01) OX=502779 GN=PAAG_04464 PE=3 SV=2
C1GSS5	1.17887	0.00541798	962	0.000970552	0.00114415	Choline-sulfatase OS=Paracoccidioides lutzii (strain ATCC MYA-826 / Pb01) OX=502779 GN=PAAG_01570 PE=4 SV=1
A0A0A2V7A1	1.17992	0.21231	1418	0.000264476	0.000312061	Uncharacterized protein OS=Paracoccidioides lutzii (strain ATCC MYA-826 / Pb01) OX=502779 GN=PAAG_11168 PE=4 SV=1
C1GXP9	1.18042	0.169215	1032	0.000320257	0.000378038	Salicylate hydroxylase OS=Paracoccidioides lutzii (strain ATCC MYA-826 / Pb01) OX=502779 GN=PAAG_03623 PE=4 SV=1
C1GZJ7	1.18043	0.0423058	987	0.000595438	0.000702871	G4 quadruplex nucleic acid binding protein OS=Paracoccidioides lutzii (strain ATCC MYA-826 / Pb01) OX=502779 GN=PAAG_03941 PE=4 SV=2
C1H5S3	1.18047	0.0294436	748	0.00048449	0.000571929	Cytochrome c OS=Paracoccidioides lutzii (strain ATCC MYA-826 / Pb01) OX=502779 GN=PAAG_06268 PE=3 SV=2
C1GX78	1.18139	0.214864	1425	0.000208599	0.000246437	Carnitine/acyl carnitine carrier OS=Paracoccidioides lutzii (strain ATCC MYA-826 / Pb01) OX=502779 GN=PAAG_03452 PE=3 SV=1
C1GZ79	1.18294	0.0547041	1686	0.000318209	0.000376422	Uncharacterized protein OS=Paracoccidioides lutzii (strain ATCC MYA-826 / Pb01) OX=502779 GN=PAAG_03823 PE=4 SV=2
C1GQE9	1.18486	0.124199	2323	0.000514894	0.000610075	CAAX prenyl protease OS=Paracoccidioides lutzii (strain ATCC MYA-826 / Pb01) OX=502779 GN=PAAG_00744 PE=3 SV=1
C1H9E0	1.1862	0.0844755	1976	0.000415806	0.000493229	Eukaryotic peptide chain release factor subunit 1 OS=Paracoccidioides lutzii (strain ATCC MYA-826 / Pb01) OX=502779 GN=PAAG_07381 PE=4 SV=2
A0A0A2V600	1.19242	0.14739	393	0.000304219	0.000362757	NADPH-cytochrome P450 reductase OS=Paracoccidioides lutzii (strain ATCC MYA-826 / Pb01) OX=502779 GN=PAAG_11783 PE=4 SV=1
C1GNF2	1.19243	0.0705031	1669	0.00020736	0.000247263	Uncharacterized protein OS=Paracoccidioides lutzii (strain ATCC MYA-826 / Pb01) OX=502779 GN=PAAG_00047 PE=4 SV=1
C1GUH5	1.19519	0.0499468	543	0.000912979	0.00109119	Adenylosuccinate synthetase OS=Paracoccidioides lutzii (strain ATCC MYA-826 / Pb01) OX=502779 GN=PAAG_02170 PE=3 SV=1
C1GTH6	1.19876	0.195949	1397	0.000193732	0.000232237	DnaJ domain-containing protein OS=Paracoccidioides lutzii (strain ATCC MYA-826 / Pb01) OX=502779 GN=PAAG_01821 PE=4 SV=1
C1GW65	1.1989	0.0521255	1381	0.000292527	0.00035071	1-phosphatidylinositol phosphodiesterase OS=Paracoccidioides lutzii (strain ATCC MYA-826 / Pb01) OX=502779 GN=PAAG_02760 PE=4 SV=2
C1HD61	1.19916	0.118199	2302	0.00102423	0.00122822	Seryl-tRNA synthetase OS=Paracoccidioides lutzii (strain ATCC MYA-826 / Pb01) OX=502779 GN=PAAG_08702 PE=4 SV=1
C1H8S4	1.1999	0.0509966	1285	0.00106475	0.0012776	T-complex protein 1 subunit gamma OS=Paracoccidioides lutzii (strain ATCC MYA-826 / Pb01) OX=502779 GN=PAAG_07165 PE=3 SV=2
C1H506	1.20003	0.0163019	759	0.000401746	0.000482109	Saccharopine dehydrogenase [NAD(+), L-lysine-forming] OS=Paracoccidioides lutzii (strain ATCC MYA-826 / Pb01) OX=502779 GN=PAAG_05847 PE=3 SV=1
C1HAX8	1.20165	0.180446	444	0.000173171	0.000208091	Uncharacterized protein OS=Paracoccidioides lutzii (strain ATCC MYA-826 / Pb01) OX=502779 GN=PAAG_07842 PE=4 SV=2
C1HD25	1.20248	0.315651	1690	0.00020437	0.000245752	ATP-dependent helicase NAM7 OS=Paracoccidioides lutzii (strain ATCC MYA-826 / Pb01) OX=502779 GN=PAAG_08666 PE=4 SV=2
C1HDW1	1.20361	0.0054363	18	0.00137197	0.00165131	GTP cyclohydrolase OS=Paracoccidioides lutzii (strain ATCC MYA-826 / Pb01) OX=502779 GN=PAAG_08954 PE=4 SV=2
C1GYR7	1.20365	0.0533053	776	0.000485214	0.000584028	Aldehyde dehydrogenase OS=Paracoccidioides lutzii (strain ATCC MYA-826 / Pb01) OX=502779 GN=PAAG_03221 PE=3 SV=2
C1GVA7	1.20509	0.265338	803	0.00019097	0.000230136	Cell cycle control protein cwf8 OS=Paracoccidioides lutzii (strain ATCC MYA-826 / Pb01) OX=502779 GN=PAAG_02580 PE=4 SV=1
C1H910	1.20554	0.0561127	370	0.000345814	0.000416892	Uncharacterized protein OS=Paracoccidioides lutzii (strain ATCC MYA-826 / Pb01) OX=502779 GN=PAAG_07251 PE=4 SV=1
C1H2P8	1.2056	0.138182	2191	0.000193509	0.000233295	Altered inheritance of mitochondria protein 24, mitochondrial OS=Paracoccidioides lutzii (strain ATCC MYA-826 / Pb01) OX=502779 GN=PAAG_05041 PE=3 SV=2
C1H8I6	1.20804	0.25522	2254	9.43352e-05	0.000113961	Uncharacterized protein OS=Paracoccidioides lutzii (strain ATCC MYA-826 / Pb01) OX=502779 GN=PAAG_06982 PE=4 SV=2
A0A0A2V215	1.20863	0.245189	1414	0.000277869	0.00033584	Uncharacterized protein OS=Paracoccidioides lutzii (strain ATCC MYA-826 / Pb01) OX=502779 GN=PAAG_11775 PE=4 SV=1
C1GV81	1.20878	0.00881242	704	0.000969593	0.00117203	3-hydroxyisobutyryl-CoA hydrolase, mitochondrial OS=Paracoccidioides lutzii (strain ATCC MYA-826 / Pb01) OX=502779 GN=PAAG_02554 PE=3 SV=2
C1H4H7	1.2089	0.199138	1750	0.000160574	0.000194118	Periodic tryptophan protein OS=Paracoccidioides lutzii (strain ATCC MYA-826 / Pb01) OX=502779 GN=PAAG_05670 PE=4 SV=2
C1GYM9	1.21044	0.0208364	19	0.00129924	0.00157265	Uncharacterized protein OS=Paracoccidioides lutzii (strain ATCC MYA-826 / Pb01) OX=502779 GN=PAAG_03183 PE=4 SV=2
C1GQH3	1.21212	0.0550553	371	0.000332506	0.000403039	Probable carboxypeptidase PAAG_00768 OS=Paracoccidioides lutzii (strain ATCC MYA-826 / Pb01) OX=502779 GN=PAAG_00768 PE=3 SV=1
C1H4T0	1.21313	0.241039	498	7.04394e-05	8.54525e-05	Glucan 1,3-beta-glucosidase OS=Paracoccidioides lutzii (strain ATCC MYA-826 / Pb01) OX=502779 GN=PAAG_05770 PE=3 SV=1
C1H7U4	1.21577	0.0947188	816	0.000235089	0.000285814	Cystathionine gamma-lyase OS=Paracoccidioides lutzii (strain ATCC MYA-826 / Pb01) OX=502779 GN=PAAG_06835 PE=3 SV=1
C1GVW1	1.21592	0.052507	2310	0.000898863	0.00109294	NADH dehydrogenase [ubiquinone] flavoprotein 1, mitochondrial OS=Paracoccidioides lutzii (strain ATCC MYA-826 / Pb01) OX=502779 GN=PAAG_02656 PE=3 SV=1
C1H3W0	1.21656	0.205982	2379	0.000160853	0.000195687	Uncharacterized protein OS=Paracoccidioides lutzii (strain ATCC MYA-826 / Pb01) OX=502779 GN=PAAG_05453 PE=4 SV=2
C1H8T2	1.21749	0.0788712	1406	0.000278007	0.000338471	Uncharacterized protein OS=Paracoccidioides lutzii (strain ATCC MYA-826 / Pb01) OX=502779 GN=PAAG_07173 PE=4 SV=2
C1GUJ0	1.2175	0.222709	2045	0.000180216	0.000219412	DNA-directed RNA polymerases I OS=Paracoccidioides lutzii (strain ATCC MYA-826 / Pb01) OX=502779 GN=PAAG_02185 PE=3 SV=1
C1GWR5	1.21767	0.03573	54	0.000567595	0.000691142	External NADH-ubiquinone oxidoreductase OS=Paracoccidioides lutzii (strain ATCC MYA-826 / Pb01) OX=502779 GN=PAAG_02960 PE=4 SV=1
C1GRB7	1.21808	0.133737	426	0.000138676	0.000168919	Small nuclear ribonucleoprotein Sm D1 OS=Paracoccidioides lutzii (strain ATCC MYA-826 / Pb01) OX=502779 GN=PAAG_01062 PE=3 SV=2
C1H1Y1	1.22006	0.151554	1364	0.000234533	0.000286144	Vacuolar protein sorting-associated protein 17 OS=Paracoccidioides lutzii (strain ATCC MYA-826 / Pb01) OX=502779 GN=PAAG_04917 PE=3 SV=1
C1H4C0	1.22239	0.131326	1348	0.000277466	0.000339172	Phosphoribosylglycinamide formyltransferase OS=Paracoccidioides lutzii (strain ATCC MYA-826 / Pb01) OX=502779 GN=PAAG_05613 PE=3 SV=1
C1HD27	1.22241	0.01558	1931	0.00119009	0.00145478	Multifunctional tryptophan biosynthesis protein OS=Paracoccidioides lutzii (strain ATCC MYA-826 / Pb01) OX=502779 GN=PAAG_08668 PE=3 SV=1
C1GVC0	1.22403	0.0555137	1982	0.000138676	0.000169745	SNF7 family protein OS=Paracoccidioides lutzii (strain ATCC MYA-826 / Pb01) OX=502779 GN=PAAG_02593 PE=4 SV=2
A0A0A2V2Z1	1.22549	0.142937	1060	0.000138676	0.000169947	Ribosomal protein L32 OS=Paracoccidioides lutzii (strain ATCC MYA-826 / Pb01) OX=502779 GN=PAAG_11087 PE=3 SV=1
C1GY84	1.22656	0.102596	1465	0.00013809	0.000169375	Ubiquitin-like modifier SUMO OS=Paracoccidioides lutzii (strain ATCC MYA-826 / Pb01) OX=502779 GN=PAAG_03038 PE=4 SV=1
C1H7K1	1.22677	0.149143	1695	0.000179881	0.000220672	Histone deacetylase RPD3 OS=Paracoccidioides lutzii (strain ATCC MYA-826 / Pb01) OX=502779 GN=PAAG_06742 PE=4 SV=2
C1H4T6	1.22755	0.0137954	1303	0.000719831	0.000883632	Dihydroxy-acid dehydratase OS=Paracoccidioides lutzii (strain ATCC MYA-826 / Pb01) OX=502779 GN=PAAG_05776 PE=4 SV=1
C1GPQ6	1.22775	0.214084	2193	0.000263932	0.000324041	ADP-ribose pyrophosphatase OS=Paracoccidioides lutzii (strain ATCC MYA-826 / Pb01) OX=502779 GN=PAAG_00501 PE=3 SV=1
C1GVS0	1.22853	0.24705	2059	0.000116515	0.000143142	4-hydroxyphenylpyruvate dioxygenase OS=Paracoccidioides lutzii (strain ATCC MYA-826 / Pb01) OX=502779 GN=PAAG_02615 PE=3 SV=1
C1H4N4	1.23088	0.0480005	99	0.000401341	0.000494003	Tricarballylate dehydrogenase OS=Paracoccidioides lutzii (strain ATCC MYA-826 / Pb01) OX=502779 GN=PAAG_05727 PE=4 SV=2
C1GVK3	1.2322	0.0570069	769	0.00030621	0.000377312	UDP-glucose 4-epimerase OS=Paracoccidioides lutzii (strain ATCC MYA-826 / Pb01) OX=502779 GN=PAAG_02280 PE=3 SV=1
C1GPM7	1.2334	0.0998021	80	0.000484714	0.000597846	Serine/threonine-protein phosphatase OS=Paracoccidioides lutzii (strain ATCC MYA-826 / Pb01) OX=502779 GN=PAAG_00472 PE=3 SV=2
C1H2P3	1.23361	0.0334978	1624	0.000525917	0.000648777	Transport protein SEC24 OS=Paracoccidioides lutzii (strain ATCC MYA-826 / Pb01) OX=502779 GN=PAAG_05036 PE=4 SV=1
C1H404	1.23413	0.141329	2005	0.000220974	0.00027271	V-type proton ATPase subunit OS=Paracoccidioides lutzii (strain ATCC MYA-826 / Pb01) OX=502779 GN=PAAG_05497 PE=3 SV=1
C1GVM0	1.2347	0.0751506	107	0.000305889	0.000377682	Cytochrome b-c1 complex subunit Rieske, mitochondrial OS=Paracoccidioides lutzii (strain ATCC MYA-826 / Pb01) OX=502779 GN=PAAG_02297 PE=4 SV=1
C1HBW9	1.23545	0.0797984	678	0.00106613	0.00131716	Hsp90 co-chaperone Cdc37 OS=Paracoccidioides lutzii (strain ATCC MYA-826 / Pb01) OX=502779 GN=PAAG_08260 PE=4 SV=1
C1H7Q7	1.23562	0.0820215	129	0.000220974	0.000273039	Uncharacterized protein OS=Paracoccidioides lutzii (strain ATCC MYA-826 / Pb01) OX=502779 GN=PAAG_06798 PE=4 SV=2
C1GS12	1.23669	0.0711372	2334	0.000388841	0.000480875	NADH dehydrogenase iron-sulfur protein OS=Paracoccidioides lutzii (strain ATCC MYA-826 / Pb01) OX=502779 GN=PAAG_01307 PE=3 SV=2
C1H3E4	1.23705	0.0976406	2026	0.000221796	0.000274373	Amidohydrolase OS=Paracoccidioides lutzii (strain ATCC MYA-826 / Pb01) OX=502779 GN=PAAG_05287 PE=4 SV=1
C1GTB0	1.23963	0.216251	1197	6.96369e-05	8.63238e-05	Uncharacterized protein OS=Paracoccidioides lutzii (strain ATCC MYA-826 / Pb01) OX=502779 GN=PAAG_01755 PE=4 SV=1
C1H6S4	1.24031	0.0398475	1040	0.000429475	0.000532681	Uncharacterized protein OS=Paracoccidioides lutzii (strain ATCC MYA-826 / Pb01) OX=502779 GN=PAAG_06465 PE=4 SV=1
C1H2L2	1.24034	0.0160424	1616	0.00103797	0.00128744	Anthranilate synthase component 1 OS=Paracoccidioides lutzii (strain ATCC MYA-826 / Pb01) OX=502779 GN=PAAG_05005 PE=4 SV=1
C1H9R9	1.24062	0.243239	2053	8.27989e-05	0.000102722	Uncharacterized protein OS=Paracoccidioides lutzii (strain ATCC MYA-826 / Pb01) OX=502779 GN=PAAG_07510 PE=4 SV=1
A0A0A2V3X6	1.24227	0.129206	2009	0.00034509	0.000428696	Uncharacterized protein OS=Paracoccidioides lutzii (strain ATCC MYA-826 / Pb01) OX=502779 GN=PAAG_12448 PE=4 SV=1
C1GSV8	1.24544	0.0259571	994	0.000552253	0.000687796	Cytochrome b2 OS=Paracoccidioides lutzii (strain ATCC MYA-826 / Pb01) OX=502779 GN=PAAG_01603 PE=3 SV=1
C1GT50	1.24572	0.0690492	1318	0.000375494	0.000467759	Uncharacterized protein OS=Paracoccidioides lutzii (strain ATCC MYA-826 / Pb01) OX=502779 GN=PAAG_01695 PE=4 SV=1
C1GUM8	1.24594	0.174259	1439	0.000166475	0.000207418	Ras-1 OS=Paracoccidioides lutzii (strain ATCC MYA-826 / Pb01) OX=502779 GN=PAAG_02351 PE=4 SV=2
C1GTB9	1.24702	0.0992467	1359	0.000388118	0.000483989	Actin binding protein OS=Paracoccidioides lutzii (strain ATCC MYA-826 / Pb01) OX=502779 GN=PAAG_01764 PE=4 SV=2
C1GNS4	1.24709	0.0207973	1332	0.000427874	0.000533597	Uncharacterized protein OS=Paracoccidioides lutzii (strain ATCC MYA-826 / Pb01) OX=502779 GN=PAAG_00169 PE=4 SV=1
C1GS86	1.24874	0.177409	2013	0.000125285	0.000156449	Uncharacterized protein OS=Paracoccidioides lutzii (strain ATCC MYA-826 / Pb01) OX=502779 GN=PAAG_01381 PE=4 SV=1
C1H8Z4	1.2498	0.0932998	1123	0.000125048	0.000156285	SNARE domain-containing protein OS=Paracoccidioides lutzii (strain ATCC MYA-826 / Pb01) OX=502779 GN=PAAG_07235 PE=4 SV=2
C1H6X1	1.25123	0.164277	1720	8.27989e-05	0.0001036	Uncharacterized protein OS=Paracoccidioides lutzii (strain ATCC MYA-826 / Pb01) OX=502779 GN=PAAG_06512 PE=4 SV=2
C1GV64	1.25199	0.0329655	1621	0.000291858	0.000365404	Small nuclear ribonucleoprotein Sm D2 OS=Paracoccidioides lutzii (strain ATCC MYA-826 / Pb01) OX=502779 GN=PAAG_02537 PE=3 SV=1
C1HC12	1.25611	0.153051	109	0.000248009	0.000311526	Glutathione S-transferase 103-1A OS=Paracoccidioides lutzii (strain ATCC MYA-826 / Pb01) OX=502779 GN=PAAG_08303 PE=3 SV=1
C1GSC0	1.25895	0.0626711	739	0.000537499	0.000676684	SH3 domain-containing protein OS=Paracoccidioides lutzii (strain ATCC MYA-826 / Pb01) OX=502779 GN=PAAG_01415 PE=4 SV=1
C1GVV1	1.26003	0.0793127	148	0.000248064	0.000312567	Centrin-3 OS=Paracoccidioides lutzii (strain ATCC MYA-826 / Pb01) OX=502779 GN=PAAG_02646 PE=4 SV=1
C1GWH0	1.26111	0.161022	201	0.000124339	0.000156805	Translation initiation factor RLI1 OS=Paracoccidioides lutzii (strain ATCC MYA-826 / Pb01) OX=502779 GN=PAAG_02865 PE=4 SV=2
A0A0A2V5C3	1.26249	0.172853	1733	0.000115425	0.000145723	Uncharacterized protein OS=Paracoccidioides lutzii (strain ATCC MYA-826 / Pb01) OX=502779 GN=PAAG_11927 PE=4 SV=1
C1H195	1.26293	0.231772	484	7.04146e-05	8.89288e-05	NADH-ubiquinone oxidoreductase 105 kDa subunit OS=Paracoccidioides lutzii (strain ATCC MYA-826 / Pb01) OX=502779 GN=PAAG_04539 PE=4 SV=1
C1GXE0	1.26656	0.175938	2066	0.000163593	0.000207201	Uncharacterized protein OS=Paracoccidioides lutzii (strain ATCC MYA-826 / Pb01) OX=502779 GN=PAAG_03514 PE=4 SV=1
C1GQ34	1.26793	0.0601299	1033	0.000428668	0.00054352	Oxidoreductase OS=Paracoccidioides lutzii (strain ATCC MYA-826 / Pb01) OX=502779 GN=PAAG_00629 PE=4 SV=2
C1H0P1	1.26933	0.0718234	839	0.000102575	0.000130203	Uncharacterized protein OS=Paracoccidioides lutzii (strain ATCC MYA-826 / Pb01) OX=502779 GN=PAAG_04335 PE=4 SV=2
C1H682	1.27237	0.0492892	106	0.000276614	0.000351956	Actin-related protein 2/3 complex subunit 4 OS=Paracoccidioides lutzii (strain ATCC MYA-826 / Pb01) OX=502779 GN=PAAG_06192 PE=3 SV=1
C1GQ66	1.27306	0.0886183	733	0.000471906	0.000600767	4-nitrophenylphosphatase OS=Paracoccidioides lutzii (strain ATCC MYA-826 / Pb01) OX=502779 GN=PAAG_00661 PE=4 SV=1
C1H9A6	1.27309	0.242033	497	0.000102681	0.000130723	Phytanoyl-CoA dioxygenase family protein OS=Paracoccidioides lutzii (strain ATCC MYA-826 / Pb01) OX=502779 GN=PAAG_07347 PE=4 SV=1
C1GW76	1.27365	0.0897752	2017	0.000194386	0.00024758	Vacuolar protein sorting-associated protein OS=Paracoccidioides lutzii (strain ATCC MYA-826 / Pb01) OX=502779 GN=PAAG_02771 PE=4 SV=2
C1GSR1	1.27437	0.0708331	1886	0.000345884	0.000440784	FAD dependent oxidoreductase superfamily OS=Paracoccidioides lutzii (strain ATCC MYA-826 / Pb01) OX=502779 GN=PAAG_01556 PE=4 SV=1
A0A0A2V5R6	1.27518	0.0728359	784	0.000153029	0.000195139	Uncharacterized protein OS=Paracoccidioides lutzii (strain ATCC MYA-826 / Pb01) OX=502779 GN=PAAG_11840 PE=3 SV=1
C1H0P3	1.2756	0.0483654	1090	0.00015229	0.000194261	Uncharacterized protein OS=Paracoccidioides lutzii (strain ATCC MYA-826 / Pb01) OX=502779 GN=PAAG_04337 PE=4 SV=2
C1GX42	1.27843	0.0541094	323	0.000570101	0.000728837	Golgi transport protein Sly1 OS=Paracoccidioides lutzii (strain ATCC MYA-826 / Pb01) OX=502779 GN=PAAG_03416 PE=3 SV=1
C1H7S4	1.28257	0.0767944	1351	0.000413814	0.000530748	Tricalbin-3 OS=Paracoccidioides lutzii (strain ATCC MYA-826 / Pb01) OX=502779 GN=PAAG_06815 PE=4 SV=2
C1H8P2	1.28266	0.0994141	96	0.000332393	0.000426348	Vesicular-fusion protein SEC18 OS=Paracoccidioides lutzii (strain ATCC MYA-826 / Pb01) OX=502779 GN=PAAG_07133 PE=4 SV=2
C1HAK5	1.28614	0.0788805	1377	0.000332018	0.000427021	Chorismate synthase OS=Paracoccidioides lutzii (strain ATCC MYA-826 / Pb01) OX=502779 GN=PAAG_07659 PE=3 SV=2
C1GP71	1.28673	0.110242	1061	0.000192855	0.000248153	Guanylate kinase OS=Paracoccidioides lutzii (strain ATCC MYA-826 / Pb01) OX=502779 GN=PAAG_00316 PE=3 SV=2
C1H3T3	1.28885	0.160637	657	9.1388e-05	0.000117786	Uncharacterized protein OS=Paracoccidioides lutzii (strain ATCC MYA-826 / Pb01) OX=502779 GN=PAAG_05426 PE=4 SV=1
A0A0A2V5R1	1.28906	0.0526692	1687	0.000262985	0.000339004	Uncharacterized protein OS=Paracoccidioides lutzii (strain ATCC MYA-826 / Pb01) OX=502779 GN=PAAG_11835 PE=4 SV=1
C1H6Z5	1.29037	0.219033	1851	0.00015232	0.000196549	Ubiquitin OS=Paracoccidioides lutzii (strain ATCC MYA-826 / Pb01) OX=502779 GN=PAAG_06536 PE=4 SV=1; Additional IDs concatenated into MaxParsimony group: A0A0A2V3S0, contaminant_UBIQUITIN08
C1GXU1	1.29104	0.169196	1017	0.000263892	0.000340694	Uncharacterized protein OS=Paracoccidioides lutzii (strain ATCC MYA-826 / Pb01) OX=502779 GN=PAAG_03664 PE=4 SV=1
C1GVT7	1.2918	0.220807	2247	0.000220486	0.000284824	E3 ubiquitin-protein ligase HUWE1 OS=Paracoccidioides lutzii (strain ATCC MYA-826 / Pb01) OX=502779 GN=PAAG_02632 PE=4 SV=1
C1GVA4	1.29299	0.0952517	1980	0.000412269	0.00053306	Uncharacterized protein OS=Paracoccidioides lutzii (strain ATCC MYA-826 / Pb01) OX=502779 GN=PAAG_02577 PE=4 SV=1
C1GQK4	1.29435	0.136072	1028	0.000319671	0.000413766	Uroporphyrinogen decarboxylase OS=Paracoccidioides lutzii (strain ATCC MYA-826 / Pb01) OX=502779 GN=PAAG_00799 PE=3 SV=1
C1GQD9	1.29606	0.24385	190	0.000138508	0.000179515	ATP-dependent RNA helicase DED1 OS=Paracoccidioides lutzii (strain ATCC MYA-826 / Pb01) OX=502779 GN=PAAG_00734 PE=3 SV=1
C1H6L3	1.30229	0.0866388	385	0.000277521	0.000361411	Aspartate aminotransferase OS=Paracoccidioides lutzii (strain ATCC MYA-826 / Pb01) OX=502779 GN=PAAG_06404 PE=4 SV=2
C1H4N8	1.30439	0.14542	1128	0.000180034	0.000234834	Vacuolar protein sorting-associated protein 33A OS=Paracoccidioides lutzii (strain ATCC MYA-826 / Pb01) OX=502779 GN=PAAG_05731 PE=3 SV=1
C1H9B3	1.30851	0.102701	1083	0.000318765	0.000417108	Lactonohydrolase OS=Paracoccidioides lutzii (strain ATCC MYA-826 / Pb01) OX=502779 GN=PAAG_07354 PE=4 SV=1
C1H7M5	1.31109	0.145145	2048	0.000138676	0.000181818	Uncharacterized protein OS=Paracoccidioides lutzii (strain ATCC MYA-826 / Pb01) OX=502779 GN=PAAG_06766 PE=3 SV=2
C1H3K6	1.31141	0.208327	2372	0.000138139	0.000181157	Alpha-amylase OS=Paracoccidioides lutzii (strain ATCC MYA-826 / Pb01) OX=502779 GN=PAAG_05349 PE=4 SV=2
C1H1I4	1.31285	0.103863	2032	6.93382e-05	9.10305e-05	Pre-mRNA-splicing factor CWC21 OS=Paracoccidioides lutzii (strain ATCC MYA-826 / Pb01) OX=502779 GN=PAAG_04628 PE=4 SV=1
C1GNM2	1.32018	0.109484	646	6.93382e-05	9.15388e-05	Uncharacterized protein OS=Paracoccidioides lutzii (strain ATCC MYA-826 / Pb01) OX=502779 GN=PAAG_00117 PE=4 SV=1
C1GXI6	1.32067	0.214657	869	9.72494e-05	0.000128434	Uncharacterized protein OS=Paracoccidioides lutzii (strain ATCC MYA-826 / Pb01) OX=502779 GN=PAAG_03560 PE=4 SV=2
C1HBV4	1.32403	0.185434	2025	0.000157528	0.000208573	FAD binding domain-containing protein OS=Paracoccidioides lutzii (strain ATCC MYA-826 / Pb01) OX=502779 GN=PAAG_08245 PE=4 SV=2
C1GSR4	1.32411	0.171826	416	0.000205409	0.000271984	Uncharacterized protein OS=Paracoccidioides lutzii (strain ATCC MYA-826 / Pb01) OX=502779 GN=PAAG_01559 PE=3 SV=1
C1GX92	1.33015	0.146988	1365	0.000398527	0.000530101	5'-nucleotidase OS=Paracoccidioides lutzii (strain ATCC MYA-826 / Pb01) OX=502779 GN=PAAG_03466 PE=3 SV=1

## Sheet: Orange
Protein id	Fold Change	pValue	GPI (Index in the sparse matrix)	Signal(Bottom)	Signal(Top)	Description
C1HCI0	-3.07667	0.000950238	878	0.000277839	9.03051e-05	Histone H2A OS=Paracoccidioides lutzii (strain ATCC MYA-826 / Pb01) OX=502779 GN=PAAG_08471 PE=3 SV=2
C1GS88	-2.593	0.00548147	1728	0.00023548	9.08135e-05	Phospho-2-dehydro-3-deoxyheptonate aldolase OS=Paracoccidioides lutzii (strain ATCC MYA-826 / Pb01) OX=502779 GN=PAAG_01383 PE=3 SV=2
C1GT72	-2.41418	0.000156686	2184	0.00025011	0.0001036	Uncharacterized protein OS=Paracoccidioides lutzii (strain ATCC MYA-826 / Pb01) OX=502779 GN=PAAG_01717 PE=4 SV=1
A0A0A2V3J7	-2.13711	0.00544746	223	0.000305904	0.00014314	Centromere/microtubule-binding protein cbf5 OS=Paracoccidioides lutzii (strain ATCC MYA-826 / Pb01) OX=502779 GN=PAAG_12386 PE=4 SV=1
C1GVL3	-2.12725	0.00469115	1696	0.000194401	9.13859e-05	Uncharacterized protein OS=Paracoccidioides lutzii (strain ATCC MYA-826 / Pb01) OX=502779 GN=PAAG_02290 PE=4 SV=2
C1H3S1	-2.01082	6.4412e-05	2008	0.000208014	0.000103447	Septum formation protein Maf OS=Paracoccidioides lutzii (strain ATCC MYA-826 / Pb01) OX=502779 GN=PAAG_05414 PE=3 SV=2
C1H7N8	-1.96731	0.00189282	463	0.000193662	9.84399e-05	Cell wall glucanase (Utr2) OS=Paracoccidioides lutzii (strain ATCC MYA-826 / Pb01) OX=502779 GN=PAAG_06779 PE=4 SV=2
C1HAQ4	-1.94789	0.00377815	1118	0.000153029	7.85611e-05	BCAS2 domain-containing protein OS=Paracoccidioides lutzii (strain ATCC MYA-826 / Pb01) OX=502779 GN=PAAG_07883 PE=4 SV=1
C1GV83	-1.88088	0.00479875	504	0.000122448	6.51013e-05	Nuclear protein SNF4 OS=Paracoccidioides lutzii (strain ATCC MYA-826 / Pb01) OX=502779 GN=PAAG_02556 PE=4 SV=1
C1H996	-1.85283	0.0044982	460	0.000120622	6.51013e-05	Uncharacterized protein OS=Paracoccidioides lutzii (strain ATCC MYA-826 / Pb01) OX=502779 GN=PAAG_07337 PE=4 SV=2
C1H4L8	-1.84126	0.00398669	1667	0.000262902	0.000142784	U2 snRNP auxiliary factor large subunit OS=Paracoccidioides lutzii (strain ATCC MYA-826 / Pb01) OX=502779 GN=PAAG_05711 PE=3 SV=1
C1H3N6	-1.84106	8.26301e-05	828	0.000360152	0.000195621	60S ribosomal protein L17 OS=Paracoccidioides lutzii (strain ATCC MYA-826 / Pb01) OX=502779 GN=PAAG_05379 PE=3 SV=2
C1H2Y5	-1.83064	0.00096735	1665	0.00033224	0.000181489	Uncharacterized protein OS=Paracoccidioides lutzii (strain ATCC MYA-826 / Pb01) OX=502779 GN=PAAG_05128 PE=4 SV=1
A0A0A2VIU4	-1.82857	0.0023224	2190	0.000331837	0.000181474	Uncharacterized protein OS=Paracoccidioides lutzii (strain ATCC MYA-826 / Pb01) OX=502779 GN=PAAG_12471 PE=4 SV=1
C1GYZ7	-1.80654	0.000482263	819	0.000375256	0.000207721	Uncharacterized protein OS=Paracoccidioides lutzii (strain ATCC MYA-826 / Pb01) OX=502779 GN=PAAG_03741 PE=4 SV=2
C1H7B3	-1.77237	0.00101314	1107	0.000138676	7.82436e-05	Signal sequence receptor alpha chain OS=Paracoccidioides lutzii (strain ATCC MYA-826 / Pb01) OX=502779 GN=PAAG_06654 PE=4 SV=1
C1H7N2	-1.72923	0.00546003	1372	0.000180048	0.00010412	Uncharacterized protein OS=Paracoccidioides lutzii (strain ATCC MYA-826 / Pb01) OX=502779 GN=PAAG_06773 PE=4 SV=2
C1GRZ9	-1.71248	0.00309781	459	0.000138676	8.09797e-05	BSD domain-containing protein OS=Paracoccidioides lutzii (strain ATCC MYA-826 / Pb01) OX=502779 GN=PAAG_01294 PE=4 SV=1
C1H8K8	-1.62096	0.00227573	822	0.000263739	0.000162706	Histone H3.3 OS=Paracoccidioides lutzii (strain ATCC MYA-826 / Pb01) OX=502779 GN=PAAG_07099 PE=3 SV=1
C1GP04	-1.51535	0.00752126	169	0.000275807	0.000182009	Endo-1,3(4)-beta-glucanase OS=Paracoccidioides lutzii (strain ATCC MYA-826 / Pb01) OX=502779 GN=PAAG_00249 PE=4 SV=2
C1GNI1	-1.49765	0.00046996	1346	0.000332338	0.000221906	U6 snRNA-associated Sm-like protein LSm1 OS=Paracoccidioides lutzii (strain ATCC MYA-826 / Pb01) OX=502779 GN=LSM1 PE=3 SV=2
C1GVX0	-1.46563	0.000282056	1659	0.000304442	0.000207721	DlpA domain-containing protein OS=Paracoccidioides lutzii (strain ATCC MYA-826 / Pb01) OX=502779 GN=PAAG_02665 PE=4 SV=2
C1GXX8	-1.33413	0.00464525	2338	0.000347415	0.000260405	Metallo-beta-lactamase family protein OS=Paracoccidioides lutzii (strain ATCC MYA-826 / Pb01) OX=502779 GN=PAAG_03261 PE=4 SV=1
C1H7Q1	-1.3296	0.00783192	2218	0.000208014	0.000156449	60S ribosomal protein L34-B OS=Paracoccidioides lutzii (strain ATCC MYA-826 / Pb01) OX=502779 GN=PAAG_06792 PE=4 SV=1
C1HBT2	1.31646	0.00388368	373	0.000276629	0.00036417	Small nuclear ribonucleoprotein Sm D3 OS=Paracoccidioides lutzii (strain ATCC MYA-826 / Pb01) OX=502779 GN=PAAG_08223 PE=3 SV=1
C1H5Q7	1.37264	0.00618547	1997	0.000236649	0.000324833	Cytochrome c oxidase subunit OS=Paracoccidioides lutzii (strain ATCC MYA-826 / Pb01) OX=502779 GN=PAAG_06252 PE=3 SV=1
C1H7G8	1.40803	0.00277847	832	0.000194386	0.0002737	Protein krueppel OS=Paracoccidioides lutzii (strain ATCC MYA-826 / Pb01) OX=502779 GN=PAAG_06709 PE=4 SV=2
C1H5J8	1.40834	1e-05	424	0.000138676	0.000195304	Uncharacterized protein OS=Paracoccidioides lutzii (strain ATCC MYA-826 / Pb01) OX=502779 GN=PAAG_06039 PE=4 SV=1
C1GWG6	1.43947	1e-05	2091	0.000135677	0.000195304	Pyridoxal reductase OS=Paracoccidioides lutzii (strain ATCC MYA-826 / Pb01) OX=502779 GN=PAAG_02861 PE=4 SV=1
C1HDS3	1.47559	0.00700577	1730	0.0001939	0.000286117	LYR family protein OS=Paracoccidioides lutzii (strain ATCC MYA-826 / Pb01) OX=502779 GN=PAAG_08916 PE=3 SV=1
C1HA62	1.50055	0.00024894	2204	0.000138676	0.000208091	NADH-ubiquinone oxidoreductase OS=Paracoccidioides lutzii (strain ATCC MYA-826 / Pb01) OX=502779 GN=PAAG_07791 PE=4 SV=1
C1HB83	1.55537	0.000496851	387	0.000233934	0.000363853	Uncharacterized protein OS=Paracoccidioides lutzii (strain ATCC MYA-826 / Pb01) OX=502779 GN=PAAG_08024 PE=4 SV=1
C1GSC4	1.64391	0.00211227	149	0.000165766	0.000272505	Kynureninase OS=Paracoccidioides lutzii (strain ATCC MYA-826 / Pb01) OX=502779 GN=BNA5 PE=3 SV=1
C1H656	1.64529	0.00581892	2212	0.000110933	0.000182517	3' exoribonuclease family protein OS=Paracoccidioides lutzii (strain ATCC MYA-826 / Pb01) OX=502779 GN=PAAG_06166 PE=4 SV=1
C1H296	1.6676	0.00155395	133	0.000194569	0.000324463	Dolichyl-phosphate-mannose-protein mannosyltransferase OS=Paracoccidioides lutzii (strain ATCC MYA-826 / Pb01) OX=502779 GN=PAAG_04725 PE=4 SV=1
C1GPN1	1.67261	0.00254412	1399	0.000175487	0.000293521	Pre-mRNA-splicing factor cwc2 OS=Paracoccidioides lutzii (strain ATCC MYA-826 / Pb01) OX=502779 GN=PAAG_00476 PE=4 SV=1
C1GSF7	1.67348	0.00189943	2199	0.000194386	0.000325301	ADP-ribosylation factor OS=Paracoccidioides lutzii (strain ATCC MYA-826 / Pb01) OX=502779 GN=PAAG_01452 PE=3 SV=2
C1GNM1	1.70413	0.00654789	186	8.36905e-05	0.00014262	Pyrroline-5-carboxylate reductase OS=Paracoccidioides lutzii (strain ATCC MYA-826 / Pb01) OX=502779 GN=PAAG_00116 PE=3 SV=1
C1GPL7	1.70768	0.00106711	408	0.000152305	0.000260088	Glutathione synthetase OS=Paracoccidioides lutzii (strain ATCC MYA-826 / Pb01) OX=502779 GN=PAAG_00462 PE=3 SV=1
C1H570	1.70855	0.00783043	464	8.36905e-05	0.000142989	Uncharacterized protein OS=Paracoccidioides lutzii (strain ATCC MYA-826 / Pb01) OX=502779 GN=PAAG_05911 PE=4 SV=1
C1GXV4	1.72427	0.0017403	2233	0.000165751	0.0002858	Phospho-2-dehydro-3-deoxyheptonate aldolase OS=Paracoccidioides lutzii (strain ATCC MYA-826 / Pb01) OX=502779 GN=PAAG_03237 PE=3 SV=2
C1H569	1.7593	0.000768687	163	0.000207193	0.000364514	Dolichyl-phosphate-mannose-protein mannosyltransferase OS=Paracoccidioides lutzii (strain ATCC MYA-826 / Pb01) OX=502779 GN=PAAG_05910 PE=4 SV=2
C1GYZ2	1.78976	0.00135538	401	0.000174144	0.000311677	Lon protease homolog, mitochondrial OS=Paracoccidioides lutzii (strain ATCC MYA-826 / Pb01) OX=502779 GN=PIM1 PE=3 SV=1
C1GR03	1.81531	0.00347008	405	0.000164944	0.000299424	NADH dehydrogenase iron-sulfur protein OS=Paracoccidioides lutzii (strain ATCC MYA-826 / Pb01) OX=502779 GN=PAAG_00948 PE=3 SV=1
C1HCD5	1.87183	0.00765513	2047	0.000153112	0.000286599	Uncharacterized protein OS=Paracoccidioides lutzii (strain ATCC MYA-826 / Pb01) OX=502779 GN=PAAG_08426 PE=4 SV=2
C1HBJ4	1.87779	1e-05	644	6.93382e-05	0.000130203	Uncharacterized protein OS=Paracoccidioides lutzii (strain ATCC MYA-826 / Pb01) OX=502779 GN=PAAG_08135 PE=4 SV=2
C1HDT5	1.88188	0.00102645	1073	0.000110765	0.000208446	Cystathionine gamma-synthase OS=Paracoccidioides lutzii (strain ATCC MYA-826 / Pb01) OX=502779 GN=PAAG_08928 PE=4 SV=2
C1H108	1.91952	0.00693341	1052	0.000152305	0.000292352	SET domain-containing protein OS=Paracoccidioides lutzii (strain ATCC MYA-826 / Pb01) OX=502779 GN=PAAG_04452 PE=4 SV=1
C1GRJ0	1.95451	0.000804118	161	0.000153197	0.000299424	Uncharacterized protein OS=Paracoccidioides lutzii (strain ATCC MYA-826 / Pb01) OX=502779 GN=PAAG_01135 PE=4 SV=2
C1GZA1	1.95688	0.00554014	1055	0.000165904	0.000324654	Succinate-semialdehyde dehydrogenase OS=Paracoccidioides lutzii (strain ATCC MYA-826 / Pb01) OX=502779 GN=PAAG_03845 PE=4 SV=1
C1GSC8	1.95772	0.00733476	1878	0.00013933	0.00027277	HHE domain-containing protein OS=Paracoccidioides lutzii (strain ATCC MYA-826 / Pb01) OX=502779 GN=PAAG_01423 PE=4 SV=1
C1HCE0	2.03889	0.00254964	2057	0.000179379	0.000365736	Dolichyl-phosphate-mannose-protein mannosyltransferase OS=Paracoccidioides lutzii (strain ATCC MYA-826 / Pb01) OX=502779 GN=PAAG_08431 PE=4 SV=1
C1H4Y7	2.16066	0.00338261	2070	0.000120622	0.000260622	Cation-transporting ATPase OS=Paracoccidioides lutzii (strain ATCC MYA-826 / Pb01) OX=502779 GN=PAAG_05828 PE=3 SV=2
C1H1R1	2.1673	0.00499873	428	0.000168035	0.000364182	Protein phosphatase PP2A regulatory subunit B OS=Paracoccidioides lutzii (strain ATCC MYA-826 / Pb01) OX=502779 GN=PAAG_04847 PE=3 SV=2
C1GTB6	2.18426	0.00524904	1856	9.62597e-05	0.000210256	Dynamin-A OS=Paracoccidioides lutzii (strain ATCC MYA-826 / Pb01) OX=502779 GN=PAAG_01761 PE=3 SV=2
C1GTG1	2.25245	0.00223639	798	8.64814e-05	0.000194796	Uncharacterized protein OS=Paracoccidioides lutzii (strain ATCC MYA-826 / Pb01) OX=502779 GN=PAAG_01806 PE=4 SV=1
C1GQS4	2.28452	0.00375031	1115	9.64275e-05	0.000220291	Fumarylacetoacetate hydrolase domain-containing protein OS=Paracoccidioides lutzii (strain ATCC MYA-826 / Pb01) OX=502779 GN=PAAG_00869 PE=4 SV=1
C1H2I0	2.50478	0.000145121	1054	0.000125063	0.000313254	Acyl-coenzyme A synthetase ACSM5 OS=Paracoccidioides lutzii (strain ATCC MYA-826 / Pb01) OX=502779 GN=PAAG_04973 PE=4 SV=1
C1HBJ7	2.55951	0.00277061	1744	9.64275e-05	0.000246807	Uncharacterized protein OS=Paracoccidioides lutzii (strain ATCC MYA-826 / Pb01) OX=502779 GN=PAAG_08138 PE=4 SV=2
